# Supplementary material for: Transcriptomic Responses to Water Deficit and Nematode Infection in Mycorrhizal Tomato Roots
Source: Front Microbiol. 2019 Aug 13;10:1807. doi: 10.3389/fmicb.2019.01807 (PMC6700261; doi:10.3389/fmicb.2019.01807)
Supplement: Supplementary file 3 [file Table_1.XLSX]

## Sheet: Table_S1
Table S1. Differentially expressed genes (DEGs) significantly up or down regulated (P≤ 0.05), in at least one condition
	C vs AM			C vs AM_WS			C vs RKN			C vs RKN_AM				C vs AM	C vs AM_WS	C vs RKN	C vs RKN_AM
Transcript ID	EDGE test: c vs am, tagwise dispersions - P-value	RPKM AM1	RPKM AM2	EDGE test: c vs am_ws, tagwise dispersions - P-value	RPKM AM_WS1	RPKM AM_WS2	EDGE test: c vs rkn, tagwise dispersions - P-value	RPKM RKN1	RPKM RKN2	EDGE test: c vs rkn_am, tagwise dispersions - P-value	RPKM RKN_AM1	RPKM RKN_AM2	Annotations - Gene symbol	EDGE test: c vs am, tagwise dispersions - Fold change	EDGE test: c vs am_ws, tagwise dispersions - Fold change	EDGE test: c vs rkn, tagwise dispersions - Fold change	EDGE test: c vs rkn_am, tagwise dispersions - Fold change
Solyc00g005000.2.1	2.95e-05	16.79	17.36	0.0854819	5.41	8.53	0.123268	5.76	5.7	0.0503685	4.97	8.74	"Aspartic proteinase nepenthesin I (AHRD V1 **-- A9ZMF9_NEPAL); contains Interpro domain(s) IPR001461 Peptidase A1 "	8.98332	3.6044	2.80552	3.25778
Solyc00g006690.2.1	0.490262	52.76	26.31	0.00993	60.69	151.54	0.0536166	108.53	49.98	0.0702511	41.71	107.02	Unknown Protein (AHRD V1)	1.40289	3.62794	2.54548	2.33179
Solyc00g007300.2.1	0.0494529	4.84	8.45	0.758395	24.31	13.61	0.34023	13.73	9.05	0.447037	11.52	15.23	Lrr, resistance protein fragment	-2.3072	1.18107	-1.47803	-1.29569
Solyc00g008580.1.1	0.464947	2.38	2.91	0.0130067	3.63	12.69	0.289875	2.91	3.15	1	0.66	0.81	Unknown Protein (AHRD V1)	2.64616	7.74863	2.77531	-1.34564
Solyc00g009040.2.1	1	0	0.14	1	0.79	0	4.5e-05	7.58	9.46	0.000498	7.14	5.89	"Polyadenylate-binding protein 2 (AHRD V1 **** B6U4M0_MAIZE); contains Interpro domain(s) IPR006515 Polyadenylate binding protein, human types 1, 2, 3, 4 "	1.21565	3.18062	50.3953	38.1288
Solyc00g009060.2.1	0.146653	10.36	13.42	0.331512	10.34	11.39	0.0457758	16.17	14.75	0.0320366	15.27	15.61	"Hypoxanthine phosphoribosyltransferase (AHRD V1 ***- B4UWA8_ARAHY); contains Interpro domain(s) IPR005904 Hypoxanthine phosphoribosyl transferase "	1.84965	1.64413	2.20017	2.13743
Solyc00g009070.1.1	1	0.21	1.17	0.134841	1.94	1.7	0.0627585	3.65	1.87	0.0313931	2.48	4.26	Unknown Protein (AHRD V1)	6.36326	14.9243	21.574	25.7554
Solyc00g009110.2.1	0.41709	48.32	45.24	0.123235	38	33.97	0.00712	25.36	21.35	0.00327	21.6	27.12	"Inositol-1 4 5-trisphosphate 5-Phosphatase-like protein (AHRD V1 *-*- Q9M1W5_ARATH); contains Interpro domain(s) IPR000300 Inositol polyphosphate related phosphatase "	-1.34767	-1.81187	-2.94963	-2.90411
Solyc00g009120.2.1	0.158003	48.18	30.72	0.492786	35.26	69.71	0.00504	28.52	17.49	0.000649	21.96	21.7	"Short-chain dehydrogenase/reductase family protein (AHRD V1 ***- D7LXC9_ARALY); contains Interpro domain(s) IPR002198 Short-chain dehydrogenase/reductase SDR "	-1.7001	-1.32183	-3.20168	-3.47691
Solyc00g009130.2.1	0.274499	19.42	8.77	0.121649	11.71	12.37	0.010013	7.39	8.94	0.00252	9.61	5.36	"Dehydrogenase/reductase SDR family member 12 (AHRD V1 ***- C0HAG0_SALSA); contains Interpro domain(s) IPR002198 Short-chain dehydrogenase/reductase SDR "	-1.64248	-2.00123	-3.11415	-3.49068
Solyc00g024150.2.1	1.66e-06	18.56	25.94	0.000819	9.64	22.87	0.391305	4.54	4.04	0.267803	6.13	4.07	"Pterin-4-alpha-carbinolamine dehydratase (AHRD V1 *-** B6T9C1_MAIZE); contains Interpro domain(s) IPR001533 Transcriptional coactivator/pterin dehydratase "	10.3646	7.42205	1.8871	2.17295
Solyc00g030000.1.1	1.63e-19	283.6	241.05	5.04e-11	69.14	104.42	0.290927	1.03	1.16	0.170984	9.02	5.37	"Cellulose synthase-4 (AHRD V1 **** Q9LLI6_MAIZE); contains Interpro domain(s) IPR005150 Cellulose synthase "	84.4412	27.1158	-2.76826	2.09898
Solyc00g042840.1.1	0.0196418	1.59	3.98	0.211315	5.62	8.09	0.512741	20.92	27.86	0.516227	26.07	21.83	"F-box domain containing protein (AHRD V1 ***- Q2QXK7_ORYSJ); contains Interpro domain(s) IPR005174 Protein of unknown function DUF295 "	-5.29078	-2.25249	1.46068	1.39403
Solyc00g048510.2.1	1.75e-13	1.97	1.29	1.7e-08	6.43	7.87	4.04e-06	14.07	13.9	1.22e-08	11.02	10.27	Phloem lectin (AHRD V1 ***- Q8LK67_9ROSI)	-51.0807	-12.7283	-6.97066	-9.39357
Solyc00g049520.2.1	1.33e-06	120.7	205.89	3.13e-08	131.23	110.99	0.00674	126.12	495.82	1.79e-06	250.92	145.95	Unknown Protein (AHRD V1)	-6.53515	-9.01607	-3.76047	-6.02953
Solyc00g050130.1.1	0.00244	15.69	12.42	0.00342	10.65	20.42	0.259857	6.76	6.08	0.33357	6.04	5.94	"UDP-glucose glucosyltransferase (AHRD V1 **** D2KTV5_LOTJA); contains Interpro domain(s) IPR002213 UDP-glucuronosyl/UDP-glucosyltransferase "	4.62916	4.9591	1.95702	1.78164
Solyc00g050430.2.1	0.000505	4.51	5.77	0.00215	9.01	6.64	0.829044	16.46	125.21	0.335761	32.17	58.17	"BHLH transcription factor (AHRD V1 *-*- A9YWR2_MEDTR); contains Interpro domain(s) IPR011598 Helix-loop-helix DNA-binding "	-14.4891	-9.89814	-1.18883	-1.87823
Solyc00g052940.2.1	0.0182653	10.89	13.83	8.75e-05	3.55	5.48	1.54e-06	2.73	3.29	0.000102	5.77	8.02	"Nodulin-like protein (AHRD V1 **-- B6TIX8_MAIZE); contains Interpro domain(s) IPR000620 Protein of unknown function DUF6, transmembrane "	-2.7692	-7.65031	-12.0185	-5.51037
Solyc00g056680.1.1	0.694157	9.83	7.66	0.202936	6.05	5.29	0.00625	3.89	1.93	0.0022	3.39	2.71	"Lipase-like protein (AHRD V1 ***- Q949E1_ORYSA); contains Interpro domain(s) IPR002921 Lipase, class 3 "	-1.21469	-1.92196	-3.87269	-3.79939
Solyc00g058890.1.1	0.0355331	6.2	4.77	2.45e-07	22.3	43.14	1	3.16	0.18	0.741459	4.83	0.23	Unknown Protein (AHRD V1)	4.29969	24.4928	1.26942	1.81886
Solyc00g059500.1.1	0.00302	23.72	28.48	0.0502005	18.59	20.31	0.466607	16.91	9.22	0.0259377	21.87	19.38	CDP-alcohol phosphatidyltransferase (AHRD V1 **-- D3BS60_POLPA)	3.19222	2.31474	1.47477	2.25439
Solyc00g063110.2.1	0.0102593	16.15	10.95	0.135752	1.28	0.94	0.0668086	1.26	1.24	0.267803	1.85	2.18	"Non-specific lipid-transfer protein (AHRD V1 ***- B9HZI0_POPTR); contains Interpro domain(s) IPR013770 Plant lipid transfer protein and hydrophobic protein, helical "	3.12914	-3.65064	-3.45869	-2.28862
Solyc00g068980.1.1	1	87.16	28.31	0.163613	107.47	99.49	0.0733448	214.67	77.33	0.0160692	111.17	233.42	Unknown Protein (AHRD V1)	1.00039	1.69971	2.27806	2.61519
Solyc00g071180.2.1	1.8e-12	0	0.27	1.6e-08	4.78	0.59	6.17e-07	1.43	9.02	7.5e-05	7.97	21.09	"Cysteine proteinase inhibitor (AHRD V1 *-** Q2VY67_9ERIC); contains Interpro domain(s) IPR000010 Proteinase inhibitor I25, cystatin "	-384.442	-37.3827	-20.8041	-7.70632
Solyc00g072100.2.1	1	4.33	5.14	0.810963	4.27	2.04	0.0897787	12.21	8.61	0.0499924	13.01	9.28	LTRGag-pol-polymerase 3 (AHRD V1 *-*- B2BXJ4_ARALY)	1.1428	-1.33702	2.27068	2.35941
Solyc00g072400.2.1	0.108737	52.25	153.76	0.028382	131.27	105.98	0.0649371	112.4	114.3	0.0108768	108.02	175.6	"Peroxidase 1 (AHRD V1 ***- A0SWU6_SESRO); contains Interpro domain(s) IPR002016 Haem peroxidase, plant/fungal/bacterial "	1.90135	2.15822	1.94834	2.38268
Solyc00g090860.1.1	0.0567268	0.74	0.68	0.237008	1.52	1.48	0.0473049	0.47	0.82	1	1.08	10.06	"Nitrate transporter (AHRD V1 ***- O04431_NICPL); contains Interpro domain(s) IPR016196 Major facilitator superfamily, general substrate transporter "	-6.41791	-3.39958	-7.60349	-1.04752
Solyc00g104940.1.1	0.0189901	2.76	4.72	0.13883	1.51	2.94	1	0.38	0	0.500152	1.53	0.27	Bax inhibitor-1 like (AHRD V1 ***- Q8LAY4_ARATH)	30.013	18.0575	2.41293	7.60926
Solyc00g106650.1.1	0.0429385	5.84	10.05	0.501818	13.02	17.51	0.366505	9.89	19.01	0.329151	16.12	14.76	BZIP transcription factor family protein expressed (AHRD V1 *--- Q2R8T2_ORYSJ)	-2.55936	-1.37306	-1.54765	-1.4879
Solyc00g112930.2.1	0.000687	26.04	36.63	0.0703275	8.55	36.37	0.0130574	1.57	1.56	0.0443498	3.37	2.57	"Alpha-N-acetylglucosaminidase (AHRD V1 ***- Q9ZR45_TOBAC); contains Interpro domain(s) IPR007781 Alpha-N-acetylglucosaminidase "	3.94233	2.77719	-5.11337	-2.86624
Solyc00g125980.1.1	0.706951	0.81	3.69	1	1.47	0	0.460273	4.16	1.42	0.0102865	10.07	3.86	NADH-ubiquinone oxidoreductase chain 2 (AHRD V1 ***- NU2M_BETVU)	2.27077	-1.24375	2.58653	6.10488
Solyc00g134620.1.1	0.000152	12.22	8.05	1	0.26	0	1	0.02	0	1	0.08	0.03	"Transferase family protein (AHRD V1 **-* D7KID7_ARALY); contains Interpro domain(s) IPR003480 Transferase "	26.5757	-1.52006	-2.8738	-2.25243
Solyc00g136560.2.1	0.0125898	1.68	0.95	0.00165	1.42	0	0.00284	1.13	1.03	0.00241	1.61	0.64	"Undecaprenyl pyrophosphate synthase (AHRD V1 *-*- D8G636_9CYAN); contains Interpro domain(s) IPR001441 Di-trans-poly-cis-decaprenylcistransferase-like "	-5.38282	-9.55277	-7.01774	-6.9179
Solyc00g138060.2.1	0.0367724	0	2.77	1	9.2	16.07	0.065924	4.3	0.7	0.57085	10.83	8.9	"2-oxoglutarate-dependent dioxygenase (AHRD V1 **** B9GL08_POPTR); contains Interpro domain(s) IPR005123 Oxoglutarate and iron-dependent oxygenase "	-8.81325	-1.0549	-5.41215	-1.48163
Solyc00g154480.1.1	1.28e-11	39.88	26.27	5.19e-05	9.31	9.64	1	0.01	0	0.500152	0.74	0.88	"Cellulose synthase-like protein E1 (AHRD V1 *-*- CSLE1_ARATH); contains Interpro domain(s) IPR005630 Terpene synthase, metal-binding domain "	219.57	61.9637	-1.14199	5.8378
Solyc00g165080.1.1	0.000164	5.36	11.59	0.00763	3.33	6.12	1	0	0	1	0.16	0.11	Unknown Protein (AHRD V1)	66.5201	37.2574	1	1.99568
Solyc00g166690.1.1	0.000292	8.01	6.44	0.00692	3.72	5.61	1	0.26	0.62	1	0.23	0.49	Unknown Protein (AHRD V1)	57.2175	36.7903	4.26632	3.66109
Solyc00g170200.1.1	1.33e-13	215.5	194.27	4.66e-06	51.27	121.41	0.0208523	0.83	5.85	0.821468	20.14	5.23	Hydrolase alpha/beta fold family protein (AHRD V1 ***- D7L528_ARALY)	20.5419	8.44633	-3.15133	1.13125
Solyc00g171810.2.1	0.820655	4.25	3.23	0.384617	4.55	0.97	0.0130162	0.95	0.64	0.0118502	1.01	0.78	"ATP synthase subunit a (AHRD V1 ***- Q45KQ5_CAPAN); contains Interpro domain(s) IPR000568 ATPase, F0 complex, subunit A "	-1.28123	-1.77969	-5.82211	-5.39514
Solyc00g174330.2.1	1	0	0	1	0.17	0	0.000885	11.91	2.99	3.24e-06	14.9	7.44	"Pathogenesis related protein PR-1 (AHRD V1 ***- Q9SC15_SOLTU); contains Interpro domain(s) IPR001283 Allergen V5/Tpx-1 related "	1	1.64194	56.7659	82.9487
Solyc00g174340.1.1	1	0	0	0.514272	1.72	0	2.75e-05	47.79	4.98	1.26e-12	38.07	32.75	"Pathogenesis-related protein 1b (AHRD V1 ***- Q941G6_SOLTU); contains Interpro domain(s) IPR018244 Allergen V5/Tpx-1 related, conserved site "	-2.88153	2.60421	67.4697	86.9901
Solyc00g183050.1.1	0.00607	0	1.26	0.00733	0.63	0	0.00209	0.31	1.21	0.0983355	3.99	1.19	FYVE zinc finger containing protein (AHRD V1 **-- Q6ASX1_ORYSJ)	-8.55655	-15.0262	-7.90587	-2.66741
Solyc00g196060.2.1	0.944413	22.33	21.82	0.472661	40.58	19.02	0.00573	67.12	63.85	0.00501	56.2	67.61	"Auxin response factor 6 (AHRD V1 ***- E0AD21_SOLLC); contains Interpro domain(s) IPR010525 Auxin response factor "	1.04396	1.35402	2.81888	2.59532
Solyc00g201160.2.1	0.834129	13.14	12.05	0.777485	7.85	16.1	0.0309726	6.35	6.06	0.0236994	7.83	4.56	"Receptor protein kinase (AHRD V1 **** Q40096_IPOTF); contains Interpro domain(s) IPR002290 Serine/threonine protein kinase "	-1.09042	-1.17963	-2.39431	-2.46521
Solyc00g206460.1.1	0.00167	58.62	36.75	0.000383	95.61	41.73	0.000925	187.56	26.23	9.36e-05	51.84	94.82	"Os06g0220000 protein (Fragment) (AHRD V1 **-- Q0DDJ2_ORYSJ); contains Interpro domain(s) IPR006766 Phosphate-induced protein 1 conserved region "	4.51877	6.17713	9.22184	6.15412
Solyc00g209460.1.1	1	0.74	0	0.519264	0	1.97	0.031444	2.83	3.48	0.125229	1.64	2.15	"GDSL esterase/lipase At1g71691 (AHRD V1 ***- GDL29_ARATH); contains Interpro domain(s) IPR001087 Lipase, GDSL "	3.87618	8.5767	24.5039	14.9534
Solyc00g233480.1.1	0.189254	283	215.69	0.244953	237.81	255.77	0.0520058	89.75	77.23	0.00599	85.18	55.62	ABC transporter-like protein (AHRD V1 *-*- Q6K376_ORYSJ)	1.5804	1.50733	-2.07808	-2.54655
Solyc00g272810.1.1	1.01e-13	1.02	2.7	6.88e-09	9.52	3.62	0.0197462	22.64	56.32	0.0372384	61.47	45.68	"N-acetyltransferase (AHRD V1 ***- B6SUK9_MAIZE); contains Interpro domain(s) IPR000182 GCN5-related N-acetyltransferase "	-49.511	-15.1746	-2.72686	-2.05951
Solyc00g313930.1.1	0.0687053	0	80.38	0.000322	58.11	30.64	0.119141	28.02	7.73	0.00166	22.81	40.46	Unknown Protein (AHRD V1)	6.10211	6.67607	2.59279	4.40795
Solyc00g323130.2.1	0.00079	215.47	217.84	0.000469	371.9	186.14	9.77e-05	431.53	276.29	5.21e-07	373.33	516.35	"Major latex-like protein (AHRD V1 **-- B5THI3_PANGI); contains Interpro domain(s) IPR000916 Bet v I allergen "	3.24189	4.0096	4.84993	5.92964
Solyc01g005000.2.1	0.288173	6.32	15.89	0.143074	14.05	13.39	0.313683	13.46	8.7	0.0489467	15.55	14.44	"Glutamate decarboxylase (AHRD V1 ***- Q1I1D8_CITSI); contains Interpro domain(s) IPR010107 Glutamate decarboxylase "	1.71218	2.0632	1.5754	2.06031
Solyc01g005010.2.1	0.134674	3.22	3.02	0.0542529	3.22	4.78	0.00396	4.65	7.59	0.00103	5.61	9.51	Protein XRI1 (AHRD V1 *-*- XRI1_ARATH)	8.88643	11.0258	15.9022	19.1251
Solyc01g005020.2.1	0.00562	36.1	36.02	0.0589762	31.42	24.76	0.285524	22.25	19.67	0.30031	18.83	23.59	"Sodium/hydrogen exchanger Na+ H+ antiporter (AHRD V1 *--* Q8IET0_PLAF7); contains Interpro domain(s) IPR018418 Na+/H+ exchanger, isoforms 7/8, conserved region "	2.76857	2.08725	1.47456	1.4522
Solyc01g005030.2.1	7.12e-07	53.88	41.54	0.000905	19.24	31.87	0.474388	8.37	8.95	0.46502	8.9	9.3	"Serine/threonine-protein kinase 36 (AHRD V1 *-*- STK36_HUMAN); contains Interpro domain(s) IPR004240 Nonaspanin (TM9SF) "	8.39438	4.36491	1.40232	1.4314
Solyc01g005060.2.1	0.572063	5.57	3.6	1	5.62	8.6	0.038089	2.18	2.68	0.0643264	2.74	2.5	"Zinc finger protein (AHRD V1 *-*- Q764N7_MALDO); contains Interpro domain(s) IPR007087 Zinc finger, C2H2-type "	-1.47959	1.00549	-2.97597	-2.84037
Solyc01g005090.2.1	0.000344	96.86	112.96	0.248344	26.06	48.88	0.00093	1.65	3.43	0.00108	4.26	2.13	"Inositol 1 4 5-trisphosphate 5-phosphatase-like protein (AHRD V1 **** Q6H453_ORYSJ); contains Interpro domain(s) IPR000300 Inositol polyphosphate related phosphatase "	5.23164	1.82905	-8.22055	-6.78439
Solyc01g005100.2.1	0.0254531	12.26	15.34	0.14082	11.15	10.88	0.848382	6.37	7.15	0.840513	6.59	7.92	"Prolyl 3-hydroxylase 1 (AHRD V1 *--- P3H1_CHICK); contains Interpro domain(s) IPR006620 Prolyl 4-hydroxylase, alpha subunit "	2.64171	2.05153	1.19909	1.25196
Solyc01g005140.2.1	2.38e-05	20.81	13.18	0.000141	12.59	17.94	1	1.17	0.86	1	2.06	2.79	"Cytochrome b561 (AHRD V1 ***- Q3LGX5_CITLA); contains Interpro domain(s) IPR006593 Cytochrome b561/ferric reductase transmembrane "	10.8781	9.46472	-1.5054	1.44151
Solyc01g005160.2.1	1	8.03	26.72	0.468711	20.44	36.89	0.00829	3.44	0.42	0.0192614	4.65	3.48	"U-box domain-containing protein (AHRD V1 ***- D7MID4_ARALY); contains Interpro domain(s) IPR003613 U box domain "	-1.02812	1.59177	-9.30357	-4.73487
Solyc01g005210.2.1	0.0243936	40.48	34.27	0.127293	29.71	28.36	0.236144	24.75	29.3	0.228456	25.35	28.99	"Alpha alpha-trehalose-phosphate synthase (UDP-forming) (AHRD V1 **** A3CXN9_METMJ); contains Interpro domain(s) IPR001830 Glycosyl transferase, family 20 "	2.43654	1.82953	1.60447	1.57016
Solyc01g005270.2.1	0.0195145	20.8	16.28	0.0525391	16.93	16.62	0.459284	11.79	10.52	0.235182	12.36	13.87	"SEC14 cytosolic factor family protein (AHRD V1 **-- D7M8H6_ARALY); contains Interpro domain(s) IPR001251 Cellular retinaldehyde-binding/triple function, C-terminal "	2.57807	2.25613	1.42186	1.62383
Solyc01g005300.2.1	0.13884	29.21	21.79	0.125387	32.21	24.41	0.0130086	3.89	5.13	0.0213953	6.83	4.25	"Flavin-binding kelch domain F box protein (AHRD V1 **-* D7KVS5_ARALY); contains Interpro domain(s) IPR015915 Kelch-type beta propeller "	1.82086	1.94232	-3.33288	-2.80287
Solyc01g005320.2.1	0.136226	1.12	15.17	0.0534626	9.87	6.16	0.012832	12.48	6.56	0.0252991	6.07	10.21	"Conserved membrane protein (AHRD V1 **-- D5ZCG4_MYCTU); contains Interpro domain(s) IPR010721 Protein of unknown function DUF1295 "	3.7706	3.65346	4.09421	3.40317
Solyc01g005330.2.1	0.425182	20.21	27.29	0.169362	36.51	27.68	0.028165	42.55	50.68	0.00711	50.87	53.97	"microtubule associated protein Type 1 (AHRD V1 **-* Q9C9X0_ARATH); contains Interpro domain(s) IPR009768 Myosin II heavy chain-like "	1.37555	1.80399	2.47047	2.70291
Solyc01g005370.2.1	5.19e-08	7.98	8.94	6.97e-07	10.21	9.92	7.12e-11	3.29	3.83	6.14e-13	4.58	2.96	"Calmodulin-2 (AHRD V1 ***- D7LFI7_ARALY); contains Interpro domain(s) IPR011992 EF-Hand type "	-8.49748	-7.37979	-21.5943	-21.0348
Solyc01g005390.2.1	0.00219	40.74	46.24	0.054115	71.51	65.29	0.00367	57.54	23.58	6.95e-06	33.54	22.43	"Nudix hydrolase 4 (AHRD V1 ***- B6T5N7_MAIZE); contains Interpro domain(s) IPR000086 NUDIX hydrolase domain "	-3.1306	-2.0547	-3.64492	-5.47562
Solyc01g005410.2.1	0.0035	20.99	21.5	0.000725	17.21	15.11	0.0371312	26.81	39.54	0.0732104	51.27	31.01	"Calcium binding protein Caleosin (AHRD V1 **-* A8N0P5_COPC7); contains Interpro domain(s) IPR007736 Caleosin related "	-3.69569	-5.01176	-2.60506	-2.16524
Solyc01g005420.2.1	0.499202	20.57	18.04	0.926322	15.99	11.91	7.31e-06	1.57	0.44	7.25e-06	1.9	1.79	"SRC2-like protein (AHRD V1 ***- A4K8J5_CAPAN); contains Interpro domain(s) IPR018029 C2 membrane targeting protein "	1.31811	-1.08484	-14.1605	-8.35939
Solyc01g005430.2.1	0.147971	36.17	36.99	0.0710063	38.21	26.46	0.000399	17.24	15.62	0.00011	20.14	13.92	"UBX domain protein 6 (AHRD V1 ***- Q7SXA8_DANRE); contains Interpro domain(s) IPR018997 PUB domain "	-1.65941	-1.94346	-4.02498	-4.00549
Solyc01g005440.2.1	0.0684926	112.3	118.44	0.00423	83.67	76.36	0.047109	73.91	141.23	0.0131247	94.75	119.12	"Jasmonate ZIM-domain protein 3 (AHRD V1 **-- B2XVS2_SOLLC); contains Interpro domain(s) IPR010399 Tify "	-1.81888	-2.70687	-2.14639	-2.20289
Solyc01g005460.2.1	0.142566	1.69	2.69	1	5.05	7.21	0.0415281	17.04	12.93	0.0254822	18.12	14.85	"Dynein light chain 1 cytoplasmic (AHRD V1 ***- C1BWV4_ESOLU); contains Interpro domain(s) IPR001372 Dynein light chain, type 1 and 2 "	-2.62242	1.00134	2.27923	2.43228
Solyc01g005470.2.1	1.83e-08	55.33	45.41	9.3e-07	69.63	65.67	0.0633766	125.72	293.76	0.000191	155.78	106.4	"Cell number regulator 10 (AHRD V1 **-- D9HP26_MAIZE); contains Interpro domain(s) IPR006461 Protein of unknown function Cys-rich "	-8.05732	-6.2255	-2.14688	-3.51993
Solyc01g005480.2.1	0.0145649	2.72	2.77	0.120567	5.83	3.89	0.795381	11.96	12.36	0.76027	8.06	10.34	"Unknown Protein (AHRD V1); contains Interpro domain(s) IPR007749 Protein of unknown function DUF677 "	-3.50655	-2.0867	1.11588	-1.21221
Solyc01g005500.2.1	1	0.34	0	1	0.39	0	0.000489	6.73	10.35	0.0393201	5.17	3.88	"3-phenylpropionate-dihydrodiol/cinnamic acid-dihydrodiol dehydrogenase (AHRD V1 *-*- HCAB_SHIFL); contains Interpro domain(s) IPR002347 Glucose/ribitol dehydrogenase "	-1.76688	-1.66853	15.1828	7.96356
Solyc01g005520.2.1	0.530343	3.89	1.96	1	2.12	1	0.0155954	6.78	8.41	0.0077	9.25	6.82	"Tetratricopeptide TPR_2 repeat protein (AHRD V1 *--- A8ZVN6_DESOH); contains Interpro domain(s) IPR001478 PDZ/DHR/GLGF "	2.19052	1.17648	5.08523	5.23641
Solyc01g005530.2.1	0.228346	6.91	7.83	0.0182479	8.85	17.07	0.0370736	10.52	11.75	0.0186046	12.24	11.8	Genomic DNA chromosome 3 P1 clone MRP15 (AHRD V1 ***- Q9LJE3_ARATH)	2.01099	3.42064	2.7655	2.90272
Solyc01g005550.2.1	0.0168046	57.77	71.09	0.368122	32	47.17	0.106663	50.8	59.28	0.101771	55.09	51.63	"Carboxyl-terminal peptidase (AHRD V1 ***- B6U8T6_MAIZE); contains Interpro domain(s) IPR004314 Protein of unknown function DUF239, plant "	2.36586	1.42101	1.8513	1.74568
Solyc01g005570.2.1	0.0219014	26.91	33.12	0.0350347	23.94	37.77	0.0273242	25.11	42.56	0.0343434	32.1	28.58	"Unknown Protein (AHRD V1); contains Interpro domain(s) IPR012438 Protein of unknown function DUF1639 "	2.31405	2.32288	2.38212	2.08237
Solyc01g005590.2.1	0.0460068	73.92	91.22	0.417485	65.25	171.24	0.000496	38.92	54.98	3.73e-06	39.79	38.58	Unknown Protein (AHRD V1)	-1.95505	-1.39011	-3.75701	-4.61451
Solyc01g005630.1.1	1.04e-07	19.7	17.53	0.152712	4.48	1.86	1	0.29	0.21	1	0.68	0.51	"Ethylene responsive transcription factor 2a (AHRD V1 *-*- C0J9I7_9ROSA); contains Interpro domain(s) IPR001471 Pathogenesis-related transcriptional factor and ERF, DNA-binding "	47.8781	8.17824	-1.09958	1.68833
Solyc01g005680.2.1	0.000166	8.2	8.62	0.000336	7.89	8.87	0.315282	16.15	34.82	0.0104447	17.72	14.31	"Cytokinin riboside 5&apos;-monophosphate phosphoribohydrolase LOG (AHRD V1 **-- LOG_ORYSJ); contains Interpro domain(s) IPR005269 Conserved hypothetical protein CHP00730 "	-4.12033	-4.26073	-1.51046	-2.45413
Solyc01g005840.2.1	0.022971	15.43	18.14	1	6.42	7.9	0.253632	8.39	15.09	0.494555	10.79	9.29	"Ubiquitin-conjugating enzyme E2 E3 (AHRD V1 **** B6T544_MAIZE); contains Interpro domain(s) IPR000608 Ubiquitin-conjugating enzyme, E2 "	2.54773	1.06844	1.63513	1.3616
Solyc01g005930.2.1	0.0474865	10.35	7.96	0.520794	3.91	6.18	0.757329	1.69	2.26	0.754281	2.92	1.9	Unknown Protein (AHRD V1)	3.2002	1.72737	-1.50221	-1.27625
Solyc01g005940.2.1	4.39e-18	159.57	171.29	7.7e-07	20.46	57.03	0.12531	0	0	1	2.89	1.15	Phytoene synthase 3	80.6519	18.5739	-16.7021	-1.07063
Solyc01g005980.2.1	0.442718	5.47	8.06	0.840994	4.7	5.3	0.159754	9	10.39	0.0206356	14.57	11.45	"POT family domain containing protein expressed (AHRD V1 *-*- D8L9H8_WHEAT); contains Interpro domain(s) IPR007493 Protein of unknown function DUF538 "	1.57699	1.14265	2.05688	2.67392
Solyc01g005990.2.1	1	3.33	3.58	0.5851	4.68	6.5	0.275912	7.33	8.53	0.0226765	7.18	24.48	"Non-specific lipid-transfer protein (AHRD V1 *-*- B9REN2_RICCO); contains Interpro domain(s) IPR003612 Plant lipid transfer protein/seed storage/trypsin-alpha amylase inhibitor "	-1.10921	1.40076	1.84652	3.61238
Solyc01g006060.2.1	1	2.11	1.43	0.171143	8.74	1.78	0.01472	8.16	8.93	0.0503685	5.37	9.08	"Disease resistance response protein (AHRD V1 ***- A8IXC7_BRACM); contains Interpro domain(s) IPR004265 Plant disease resistance response protein "	1.04381	2.85193	4.37286	3.61259
Solyc01g006100.2.1	0.41044	0.26	0.55	1	4.17	1.32	0.015404	12.31	7.97	0.00138	12.51	12.62	"Cytosine-specific methyltransferase (AHRD V1 *-*- B4XTS9_ELAGV); contains Interpro domain(s) IPR001525 C-5 cytosine-specific DNA methylase "	-4.59938	1.13584	3.82019	4.57846
Solyc01g006170.2.1	0.000203	6.91	12.55	0.129699	24.76	24.75	0.218101	30.61	27.89	0.340337	38.51	31.07	"rRNA processing protein ebna1-binding protein-related (AHRD V1 *--* C4QG91_SCHMA); contains Interpro domain(s) IPR008610 Eukaryotic rRNA processing "	-4.33305	-1.76113	-1.5811	-1.37141
Solyc01g006310.2.1	0.000898	10.31	13.94	0.124791	4.09	8	0.687887	1.45	0.21	1	1.18	2.11	"Peroxidase (AHRD V1 ***- D7LZC8_ARALY); contains Interpro domain(s) IPR002016 Haem peroxidase, plant/fungal/bacterial "	5.93677	2.91847	-2.33844	-1.29883
Solyc01g006320.2.1	1	1.24	0.57	0.634363	0.56	0	0.0281048	14.72	2.63	0.00275	8.75	9.91	"Non-race specific disease resistance protein 1-like protein b (AHRD V1 ***- D2CFI3_COFAR); contains Interpro domain(s) IPR010847 Harpin-induced 1 "	-1.51477	-3.89161	5.22273	5.41601
Solyc01g006370.2.1	0.118439	7.2	10.74	1	26.98	14	0.012934	68.13	60.76	0.00778	61.34	68.92	"Glucan synthase like 3 (AHRD V1 ***- D8R8I5_SELML); contains Interpro domain(s) IPR003440 Glycosyl transferase, family 48 "	-2.13693	1.02754	3.05413	2.99926
Solyc01g006380.2.1	1.98e-05	66.81	65.86	0.125259	15.88	33.98	0.00144	3.02	1.31	0.00445	3.97	2.84	U-box domain-containing protein (AHRD V1 ***- B6V8G2_HELAN)	5.51082	2.02364	-5.72802	-3.81988
Solyc01g006400.2.1	1.78e-06	8.34	21.51	0.000349	33.21	17.5	0.193019	54.11	76.92	0.415226	59.73	102.86	Cysteine-rich extensin-like protein-4 (AHRD V1 *-*- Q08197_TOBAC)	-6.47602	-3.92352	-1.61134	-1.32476
Solyc01g006450.2.1	1	3.06	4.49	1	4.68	1.78	0.0438008	9.22	8.64	0.0957595	7.88	9.74	"Enoyl reductase (AHRD V1 ***- P93062_BRANA); contains Interpro domain(s) IPR014358 Enoyl-[acyl-carrier-protein] reductase (NADH) "	1.21262	1.01167	2.57923	2.47653
Solyc01g006510.2.1	0.0270462	31.22	25.69	0.128051	20.09	26.49	0.404545	17.34	20.85	0.321928	19.1	19.9	"L-threonine 3-dehydrogenase (AHRD V1 ***- TDH_ANADF); contains Interpro domain(s) IPR002328 Alcohol dehydrogenase, zinc-containing, conserved site "	2.33491	1.85314	1.42797	1.41812
Solyc01g006580.2.1	0.112551	9.8	7.17	0.230392	2.59	14.48	0.12148	9.52	7.94	0.00758	12.69	12.09	"2-oxoglutarate-dependent dioxygenase (AHRD V1 **** B9GL08_POPTR); contains Interpro domain(s) IPR005123 Oxoglutarate and iron-dependent oxygenase "	2.46361	2.40821	2.32182	3.19341
Solyc01g006620.2.1	0.0305493	7.13	6.41	0.741975	2.17	3.35	0.0950439	4.33	6.48	0.0929241	5.91	4.82	"Phosphoribosylanthranilate transferase (Fragment) (AHRD V1 *--- Q43085_PEA); contains Interpro domain(s) IPR013583 Phosphoribosyltransferase C-terminal, plant "	4.37178	1.77953	3.21657	3.1105
Solyc01g006640.1.1	5.06e-11	35.02	42.12	0.00593	6.11	10.57	0.500207	0.02	0	1	0.53	0.45	"AMP-dependent synthetase and ligase (AHRD V1 *--- B2J012_NOSP7); contains Interpro domain(s) IPR011614 Catalase, N-terminal "	44.2784	9.45798	-6.5843	-1.55101
Solyc01g006660.1.1	0.00178	1.22	2.97	0.0161746	3.85	5.5	0.0157167	7.99	2.14	0.152179	9.82	15.77	"Subtilisin-like serine protease (AHRD V1 **-* Q8LAE1_ARATH); contains Interpro domain(s) IPR015500 Peptidase S8, subtilisin-related "	-13.0058	-6.13664	-5.99251	-2.48644
Solyc01g006720.2.1	0.0148068	11.94	6.41	0.000615	10.64	20.33	1	2.61	0.69	0.375381	0.28	0.53	"ABC transporter G family member 22 (AHRD V1 ***- AB22G_ARATH); contains Interpro domain(s) IPR013525 ABC-2 type transporter "	4.10535	6.67549	-1.39279	-4.69086
Solyc01g006830.2.1	0.00597	37.56	68.42	0.0337196	40.08	44.23	0.00617	53.65	59.11	0.00568	59.39	47.17	"Os02g0200800 protein (Fragment) (AHRD V1 *-*- Q0E303_ORYSJ); contains Interpro domain(s) IPR009675 Targeting for Xklp2 "	2.86177	2.23236	2.808	2.57768
Solyc01g006840.2.1	2.09e-05	16.26	18.33	0.0810992	5.73	7.86	0.375516	0.53	0.94	1	2.7	1.1	"Calcium dependent protein kinase 26 (AHRD V1 **** B9H9M4_POPTR); contains Interpro domain(s) IPR002290 Serine/threonine protein kinase "	8.76451	3.38634	-2.50138	-1.09709
Solyc01g006890.2.1	3.36e-05	9.28	12.98	0.000328	15.34	12.45	0.0114861	21.47	24.51	0.0111672	23.92	27.57	Genomic DNA chromosome 5 P1 clone MUK11 (AHRD V1 ***- Q9FMC4_ARATH)	-4.79184	-3.96095	-2.5471	-2.33512
Solyc01g006900.2.1	0.146219	119.13	138.22	0.0545473	156.21	164.49	0.139921	194.81	108.82	0.0363329	158.29	197.22	"Phosphatidylglycerol/phosphatidylinositol transfer protein (AHRD V1 -**- C5M4H0_CANTT); contains Interpro domain(s) IPR003172 MD-2-related lipid-recognition "	1.70615	2.06627	1.85218	2.10277
Solyc01g006930.2.1	0.000663	101	107.87	0.111661	64.08	51.25	0.524238	45.05	40.85	0.507107	42.65	44.99	"Nuclear transcription factor Y subunit A-2 (AHRD V1 **** B6SM21_MAIZE); contains Interpro domain(s) IPR001289 CCAAT-binding transcription factor, subunit B "	3.41317	1.82464	1.28592	1.27676
Solyc01g006950.2.1	0.22498	152.51	149.98	0.219939	214.45	73.8	0.0279837	132.05	73.96	0.00115	93.56	75.76	"Syntaxin (AHRD V1 ***- Q6X9V9_HORVD); contains Interpro domain(s) IPR010989 t-SNARE "	-1.53827	-1.68744	-2.4636	-3.1017
Solyc01g006990.2.1	0.0151998	18.08	13.95	0.144731	22.95	24.31	0.0376375	20.56	18	0.0473997	25.13	19.78	"F-box family protein (AHRD V1 ***- D7KNJ0_ARALY); contains Interpro domain(s) IPR001810 Cyclin-like F-box "	-2.45617	-1.72742	-2.24221	-1.98627
Solyc01g007000.2.1	0.0476041	157.36	104.86	0.0822118	152.09	151.02	3.38e-05	61.56	28.33	5.96e-08	42.59	23.32	"U-box domain-containing protein (AHRD V1 ***- D7LU64_ARALY); contains Interpro domain(s) IPR003613 U box domain "	-2.20585	-1.98748	-7.05484	-9.99424
Solyc01g007010.2.1	0.740521	142.84	109.04	0.868583	83.15	125.06	0.00312	35.93	23.83	0.000266	29.74	20.41	"U-box domain-containing protein (AHRD V1 ***- D7LU64_ARALY); contains Interpro domain(s) IPR003613 U box domain "	1.15797	-1.0797	-3.9859	-4.90836
Solyc01g007020.2.1	0.358932	188.72	131.36	0.490544	114.18	242.07	0.0228575	115.63	61.7	0.000796	74.38	54.16	"U-box domain-containing protein (AHRD V1 ***- D7LU64_ARALY); contains Interpro domain(s) IPR003613 U box domain "	-1.4832	-1.37497	-2.93908	-4.20116
Solyc01g007030.2.1	0.737335	306.49	203.07	0.427684	121.25	292.7	0.0119254	127.47	44.98	0.000218	74.84	48.14	"U-box domain-containing protein (AHRD V1 ***- D7LU64_ARALY); contains Interpro domain(s) IPR016024 Armadillo-type fold "	-1.1636	-1.47725	-3.76657	-5.49518
Solyc01g007110.2.1	0.0105115	47.73	29.27	0.235006	79.64	60.18	0.250307	96.39	46.45	0.109152	66.77	69.49	"NC domain-containing protein (AHRD V1 **-- D7LZP9_ARALY); contains Interpro domain(s) IPR007053 NC "	-2.74026	-1.57871	-1.62573	-1.76062
Solyc01g007130.2.1	0.00863	8.73	7.84	0.057948	7.54	4.88	4.1e-07	21.92	24.69	3.54e-07	19.99	23.1	Receptor like kinase, RLK	4.86875	3.55242	12.4203	11.1925
Solyc01g007170.2.1	0.0278208	0	0.31	0.440136	2.35	2.26	0.698795	3.82	2.47	1	5.06	5.71	"Protein unc-13 homolog C (AHRD V1 *--- UN13C_RAT); contains Interpro domain(s) IPR013583 Phosphoribosyltransferase C-terminal, plant "	-16.1676	-1.94541	-1.53723	1.05785
Solyc01g007220.2.1	0.227193	148.17	143.78	0.309331	111.58	195.28	0.225716	146.17	163.09	0.0251504	103.12	134.25	"NHL1 (Fragment) (AHRD V1 **-- B0LZM3_ARATH); contains Interpro domain(s) IPR010847 Harpin-induced 1 "	-1.49076	-1.45634	-1.54455	-2.0607
Solyc01g007410.2.1	0.238903	3.91	14.35	0.0108627	7.16	0	0.021932	6.16	6.9	0.000408	3.26	4.39	"Cytochrome b559 subunit alpha (AHRD V1 *-*- D4PBC8_PHODC); contains Interpro domain(s) IPR006217 Photosystem II protein cytochrome b559, alpha subunit "	-1.6469	-4.2311	-2.47984	-4.29025
Solyc01g007500.2.1	0.209959	1.37	2.51	0.246885	3.6	0.71	0.0235487	0.3	0.78	0.0207224	0.96	0.15	"Photosystem II CP47 chlorophyll apoprotein (AHRD V1 ***- D3WBA3_9BORA); contains Interpro domain(s) IPR017486 Photosystem II, PsbB "	-3.33783	-3.14005	-11.1361	-11.198
Solyc01g007700.2.1	0.677676	23.42	27.08	0.88582	19.91	38.14	0.00874	11.8	5.79	0.00557	5.47	11.84	Conserved protein (AHRD V1 *-*- C7TFZ2_LACRL)	-1.21653	-1.08421	-3.76478	-3.92724
Solyc01g007710.2.1	0.434088	14.37	15.42	0.906052	22.27	18.2	0.0350797	11.82	5.56	0.0693208	9.05	12.53	Unknown Protein (AHRD V1)	-1.40751	-1.07356	-2.61466	-2.17112
Solyc01g007720.2.1	0.943438	5.57	19.73	0.56602	7.72	11.12	0.013963	3.62	2.21	0.00295	2.16	0.81	ORF42f (AHRD V1 *-*- Q32989_PINTH)	-1.06793	-1.44349	-4.80281	-9.31175
Solyc01g007740.2.1	0.123507	20.18	16.11	0.0641374	21.64	22.04	0.0312588	24.51	23.82	0.0254577	22.13	27.5	"Peroxiredoxin (AHRD V1 **-- Q9FE12_PHAVU); contains Interpro domain(s) IPR000866 Alkyl hydroperoxide reductase/ Thiol specific antioxidant/ Mal allergen "	1.8228	2.11988	2.21004	2.20866
Solyc01g007770.2.1	0.039112	14.36	17	0.00656	13.23	9.94	0.0913365	20.95	16.95	0.00551	11.77	16.17	Genomic DNA chromosome 5 P1 clone MHF15 (AHRD V1 ***- Q9FNI0_ARATH)	-2.16981	-3.02214	-1.96169	-2.72581
Solyc01g007890.1.1	4.66e-07	40.91	32.61	0.077302	10.9	9.82	0.390434	2.04	2.68	0.388578	2.17	2.67	Unknown Protein (AHRD V1)	9.27238	2.54532	-1.75041	-1.75618
Solyc01g007920.2.1	0.00106	11.05	10	0.124902	4.53	5.74	0.229002	3.42	4.75	0.508412	2.99	3.78	"Isochorismatase family protein (AHRD V1 ***- B5IAW4_ACIB4); contains Interpro domain(s) IPR000868 Isochorismatase-like "	6.91904	3.31361	2.51408	2.0408
Solyc01g007980.2.1	0.193998	6.39	6.51	0.196327	4.24	8.1	0.0239265	5.29	3.13	0.040988	8.08	3.34	RLK, Receptor like protein, putative resistance protein with an antifungal domain	-1.77257	-1.90643	-2.93109	-2.24128
Solyc01g007990.2.1	0.0346317	7.32	6.81	0.00139	5.11	2.35	0.0673301	11.75	7.1	0.0607469	10.93	9.45	RLK, Receptor like protein, putative resistance protein with an antifungal domain	-2.46998	-4.76581	-2.03132	-1.9347
Solyc01g008030.2.1	0.0143636	18.61	47.43	0.104899	44.42	52.15	0.00196	25.06	31.77	0.00313	38.65	31.83	Unknown Protein (AHRD V1)	-2.58436	-1.7959	-3.24209	-2.68969
Solyc01g008050.2.1	0.603439	2.56	3.13	0.657787	5.1	0	0.137718	10.54	7.28	0.00342	14.89	16.24	"Leaf senescence protein-like (AHRD V1 ***- Q67V91_ORYSJ); contains Interpro domain(s) IPR004253 Protein of unknown function DUF231, plant "	-1.39081	-1.59805	2.00159	3.37716
Solyc01g008070.2.1	0.0115419	21.41	16.45	0.248852	9.84	14.33	0.636823	8.74	10.69	1	6.84	8.56	"Alpha/beta superfamily hydrolase (AHRD V1 *--- D0CIF5_9SYNE); contains Interpro domain(s) IPR010765 Protein of unknown function DUF1350 "	2.848	1.76634	1.3426	1.041
Solyc01g008090.2.1	0.0463126	90.72	124.33	0.211854	184.4	89.91	0.634406	294.98	262.1	0.488665	313.28	287.16	"Ribosomal protein S27 (AHRD V1 ***- Q3HVK9_SOLTU); contains Interpro domain(s) IPR000592 Ribosomal protein S27e "	-1.99074	-1.61481	1.19556	1.25061
Solyc01g008210.2.1	0.00116	59.79	30.64	0.00264	53.14	58.78	0.00183	65.81	20.77	0.000494	37.9	64.31	Unknown Protein (AHRD V1)	-4.00295	-3.37904	-4.59938	-4.01859
Solyc01g008220.2.1	3.47e-05	33.47	15.91	0.0015	50.55	36.65	0.000219	41.06	12.14	0.000252	42.53	45.69	Arabinogalactan protein (AHRD V1 ***- B6SST2_MAIZE)	-5.90422	-3.513	-6.0301	-3.77146
Solyc01g008300.1.1	0.0082	7.87	8.04	0.0784998	7.56	5.57	1	1.53	1.67	1	2.16	2.92	"Hydroxycinnamoyl CoA shikimate/quinate hydroxycinnamoyltransferase-like protein (AHRD V1 **-* B9IAS9_POPTR); contains Interpro domain(s) IPR003480 Transferase "	4.30094	3.45491	-1.18221	1.27068
Solyc01g008330.2.1	0.0154504	104.45	120.34	0.372642	70.44	46.7	0.953806	41.79	34.49	0.529568	56.53	52.51	"Acetyl-CoA carboxylase biotin carboxylase (AHRD V1 ***- B4VQU4_9CYAN); contains Interpro domain(s) IPR004549 Acetyl-CoA carboxylase, biotin carboxylase "	3.07034	1.54899	-1.04409	1.32631
Solyc01g008450.1.1	0.0255315	0.69	1.45	0.276503	5.32	0	0.0183384	1.85	0.78	0.0135363	0.98	1.29	Unknown Protein (AHRD V1)	-5.12282	-2.29236	-4.59514	-5.3758
Solyc01g008490.2.1	0.0267633	10.17	11.56	0.123072	6.85	10.47	0.375799	5.64	7.16	0.629961	5.61	4.95	"Nuclear transcription factor Y subunit A-1 (AHRD V1 *-** B6TAR1_MAIZE); contains Interpro domain(s) IPR001289 CCAAT-binding transcription factor, subunit B "	2.93762	2.2858	1.59708	1.28861
Solyc01g008530.2.1	1	6	6.11	0.594336	11.86	6.78	0.00425	22.4	22.78	0.00768	21.1	19.87	"Cinnamoyl CoA reductase-like protein (AHRD V1 ***- B9HNY0_POPTR); contains Interpro domain(s) IPR016040 NAD(P)-binding domain "	-1.07777	1.37289	3.11474	2.74329
Solyc01g008560.2.1	0.0215252	36.96	24.78	0.560903	72.39	49.51	0.0535305	50.42	14.35	0.0072	33.15	31.96	"NAD kinase 1 (AHRD V1 **** B6SWV6_MAIZE); contains Interpro domain(s) IPR002504 ATP-NAD/AcoX kinase "	-2.36027	-1.25008	-2.46135	-2.53765
Solyc01g008620.2.1	0.508876	46.33	66.73	0.0097	12.34	18.24	0.530062	23.78	49.93	1	67.44	30.18	"Beta-1 3-glucanase (AHRD V1 ***- Q9SYX6_TOBAC); contains Interpro domain(s) IPR000490 Glycoside hydrolase, family 17 "	1.28974	-2.91377	-1.29984	-1.01194
Solyc01g008650.2.1	3.85e-05	18.02	16.13	0.0143814	10.57	7.85	0.0488923	7.93	7.64	0.144499	6.78	6.45	Cytochrome P450	7.64021	4.01069	3.22042	2.67295
Solyc01g008690.2.1	5.9e-09	13.53	7.01	1.89e-09	9.37	9.77	3.49e-12	4.87	4.18	1.22e-13	2.99	7.56	GDP-mannose transporter (AHRD V1 **** B2VUF6_PYRTR)	-11.1879	-12.4662	-27.5148	-24.3077
Solyc01g008730.2.1	0.00539	27.69	25.7	0.240131	15.18	15.74	0.601456	13.29	11.47	0.779434	11.49	12.72	"BZIP transcription factor (AHRD V1 **** Q9SQK1_TOBAC); contains Interpro domain(s) IPR011616 bZIP transcription factor, bZIP-1 "	2.96535	1.66828	1.26442	1.20395
Solyc01g008780.2.1	0.0108467	17.53	19.99	0.226383	11.92	12.18	0.199208	13.67	12.44	0.170829	13.02	12.99	"Phospholipase A22 (AHRD V1 ***- B9SJ74_RICCO); contains Interpro domain(s) IPR016090 Phospholipase A2 "	2.78345	1.74208	1.77957	1.72339
Solyc01g008810.2.1	0.0588139	13.43	10.61	0.036257	12.81	8.57	0.536053	15.47	25.41	0.265138	17.44	19.05	"Zinc finger family protein (AHRD V1 **-- D7LZ79_ARALY); contains Interpro domain(s) IPR018957 Zinc finger, C3HC4 RING-type "	-1.98928	-2.31605	-1.29198	-1.48337
Solyc01g008850.2.1	0.000756	9.93	26.08	0.140682	48.71	31.33	0.384432	53.14	52.53	0.303567	58.21	49.68	"CBL-interacting protein kinase 18 (AHRD V1 ***- C4P7W7_VITVI); contains Interpro domain(s) IPR002290 Serine/threonine protein kinase "	-3.73226	-1.72486	-1.38106	-1.39252
Solyc01g008910.2.1	0.00417	9.9	10.43	0.164222	4.25	6.94	0.552246	2.25	4.98	0.754281	2.86	3.91	"Scarecrow transcription factor family protein (AHRD V1 **-* D7MIP9_ARALY); contains Interpro domain(s) IPR005202 GRAS transcription factor "	4.82925	2.60979	1.61191	1.47346
Solyc01g008960.2.1	0.119694	150.59	136.69	0.112971	165.53	141.73	0.043266	201.21	189.34	0.0284976	191.64	192.8	"Argonaute 4-like protein (AHRD V1 ***- D5FQ91_PELHO); contains Interpro domain(s) IPR003165 Stem cell self-renewal protein Piwi "	1.67149	1.72459	2.07046	1.98119
Solyc01g009040.2.1	0.300659	1.23	2.6	0.572837	9.24	6.41	0.00404	19.66	20.24	0.00051	27.4	22.26	"Cyclin B1 (AHRD V1 **** Q9LD02_TOBAC); contains Interpro domain(s) IPR014400 Cyclin, A/B/D/E "	-2.58646	1.461	3.46467	4.17731
Solyc01g009100.2.1	0.0431518	61.25	100.41	0.872602	150.19	171.04	0.834025	197.78	194.48	0.745607	230.96	185.8	"Ribosomal protein L30 (AHRD V1 ***- B3TLP4_ELAGV); contains Interpro domain(s) IPR000231 Ribosomal protein L30e "	-2.06175	-1.06039	1.08369	1.11679
Solyc01g009200.2.1	0.522338	1.7	1.56	0.774773	3.11	0.68	0.0222332	8.76	11.11	0.33357	6.52	5.64	"Restricted tev movement 2 (AHRD V1 *--- D5K219_ARATH); contains Interpro domain(s) IPR008978 HSP20-like chaperone "	-1.81192	-1.6261	2.89079	1.73715
Solyc01g009370.1.1	0.0234208	0.32	16.12	0.240079	2.37	3.02	2.51e-08	24.02	16.98	1.6e-06	11.54	15.36	Cytochrome P450	11.8744	4.00222	27.7698	17.7935
Solyc01g009400.2.1	0.0124062	0	13.45	0.515061	1.75	0	1	0.22	0.07	1	0.46	0.02	"Peroxidase 57 (AHRD V1 ***- D7LXN0_ARALY); contains Interpro domain(s) IPR002016 Haem peroxidase, plant/fungal/bacterial "	40.2802	5.97573	1.60704	2.15195
Solyc01g009430.2.1	1	10.74	8.27	0.020867	2.68	1.8	0.154716	15.42	21.34	1	11.45	8.8	Os02g0448600 protein (Fragment) (AHRD V1 *--- Q0E1G8_ORYSJ)	1.05669	-3.98845	1.84983	1.00077
Solyc01g009440.1.1	0.00052	0.52	0	0.0101063	1.9	0	0.00155	0.98	0	0.00112	0.65	0.11	"Ethylene-responsive transcription factor 10 (AHRD V1 *-** ERF77_ARATH); contains Interpro domain(s) IPR001471 Pathogenesis-related transcriptional factor and ERF, DNA-binding "	-25.852	-9.66466	-17.5391	-21.8491
Solyc01g009480.2.1	0.105868	2.71	3.17	0.00106	1.52	0	0.00169	0.55	1.36	0.00453	2.11	1.11	"Hydrolase alpha/beta fold family protein (AHRD V1 **** D7LRW3_ARALY); contains Interpro domain(s) IPR000073 Alpha/beta hydrolase fold-1 "	-2.64232	-9.38368	-8.13283	-5.22476
Solyc01g009560.1.1	0.0849564	0	0.86	0.0973451	0.14	1.24	0.0173386	0	0	0.0615445	0	1	"Terminal flower 1 (Fragment) (AHRD V1 **-- B3VT07_9ROSA); contains Interpro domain(s) IPR008914 Phosphatidylethanolamine-binding protein PEBP "	-7.23312	-5.02183	-32.5478	-7.06058
Solyc01g009580.1.1	0.148407	1.84	2.93	0.746168	3.26	6.87	0.00056	0.14	0	0.03903	1.23	2.82	"Terminal flower 1 (Fragment) (AHRD V1 **-- B3VT07_9ROSA); contains Interpro domain(s) IPR008914 Phosphatidylethanolamine-binding protein PEBP "	-2.73478	-1.36151	-36.6027	-3.55604
Solyc01g009810.2.1	1.28e-13	73.7	75.98	5.24e-08	26.01	37.15	1.94e-05	16.34	17.25	1.71e-07	31.09	19.2	LRR receptor-like serine/threonine-protein kinase, RLP	44.1271	18.1645	9.14046	13.2519
Solyc01g009820.2.1	0.170803	14.31	16.4	0.208998	18.61	14.01	0.150574	17.19	14.8	0.0308003	13.56	13.75	Hydroxyproline-rich glycoprotein family protein (AHRD V1 ***- D7LGA9_ARALY)	-1.67231	-1.627	-1.75381	-2.10934
Solyc01g009860.2.1	0.000259	107.32	145.6	2.4e-06	90.63	64.2	1.97e-08	45.22	51.93	2.1e-09	66.85	42.05	"NAC domain transcription factor (AHRD V1 **** Q5DM36_WHEAT); contains Interpro domain(s) IPR003441 No apical meristem (NAM) protein "	-3.7752	-6.34899	-10.6958	-9.8473
Solyc01g009990.2.1	0.00714	58.96	50.24	0.0655526	34.14	53.53	0.376246	35.34	27.5	0.124149	34.97	42.81	"Peptidyl-prolyl cis-trans isomerase (AHRD V1 ***- B9RMA5_RICCO); contains Interpro domain(s) IPR002130 Peptidyl-prolyl cis-trans isomerase, cyclophilin-type "	2.7805	2.16854	1.46229	1.7574
Solyc01g010040.2.1	0.033451	9.14	7.5	0.335652	15.26	11.67	0.633046	8.93	25.69	0.415243	21.78	10.13	"S-adenosylmethionine decarboxylase uORF (AHRD V1 *-*- Q6RUQ6_DAUCA); contains Interpro domain(s) IPR012511 S-adenosyl-l-methionine decarboxylase leader peptide "	-2.34075	-1.504	-1.24719	-1.3902
Solyc01g010060.2.1	0.00134	38.28	44.22	0.0517628	21.19	29.93	0.117582	30.51	15.9	0.260707	19.69	15.79	Unknown Protein (AHRD V1)	4.31508	2.60753	2.23564	1.66354
Solyc01g010180.2.1	1	0.16	0.14	1	0	0	1	0.73	1.38	0.0396549	2.4	6.31	Unknown Protein (AHRD V1)	-1.61936	-3.54214	2.44505	9.01565
Solyc01g010200.2.1	1.09e-07	61.8	65.82	1.74e-05	43.09	49.59	0.264328	14.27	9.47	0.121436	15.02	13.56	LTRGag-pol-polymerase 3 (AHRD V1 ***- B2BXJ4_ARALY)	9.70279	6.84455	1.67323	1.9565
Solyc01g010230.2.1	5.43e-05	57.02	33.41	0.00143	33.32	27.73	0.000259	64.57	30.84	1.22e-06	55.85	59.06	Unknown Protein (AHRD V1)	5.58915	3.62004	5.36496	6.25135
Solyc01g010260.2.1	4.33e-14	85.66	80.32	2.44e-07	21.76	41.04	0.25031	0.07	0	1	2.41	1.03	Cytochrome P450	57.4851	21.2363	-9.20118	1.14545
Solyc01g010290.2.1	0.00476	78.12	82.39	0.188389	44.38	56.93	0.457564	28.79	19.68	0.758882	30.95	29.07	"Ureide permease 2 (AHRD V1 ***- B6U6B9_MAIZE); contains Interpro domain(s) IPR009834 Fatty acid elongase 3-ketoacyl-CoA synthase 1 "	2.67965	1.64514	-1.34404	-1.11992
Solyc01g010350.2.1	3.1e-14	87.26	79.8	7.96e-07	18.27	41.57	0.25031	0.12	0.1	1	1.38	1.44	"Glucose-6-phosphate/phosphate translocator (AHRD V1 **** Q7XY15_WHEAT); contains Interpro domain(s) IPR004696 Tpt phosphate/phosphoenolpyruvate translocator "	50.6705	17.7488	-7.29499	-1.19863
Solyc01g010360.2.1	0.0478421	2.99	5.18	1	0.99	1.33	1	0	0.07	1	0.14	0.05	"14-3-3-like protein GF14 epsilon (AHRD V1 **-- 14310_ARATH); contains Interpro domain(s) IPR000308 14-3-3 protein "	8.18862	2.44074	-3.24939	-2.48171
Solyc01g010390.2.1	0.000397	3.3	2.76	0.00195	5.9	1.94	0.319231	13.09	13.27	0.250978	11.76	14.07	"Beta-glucosidase (AHRD V1 ***- D3YJ59_VITVI); contains Interpro domain(s) IPR001360 Glycoside hydrolase, family 1 "	-5.71952	-4.62451	-1.48483	-1.55471
Solyc01g010420.2.1	0.38783	9.54	7.93	0.0885387	6.9	4.43	3.58e-05	2.09	0.78	6.77e-06	0.65	1.35	"NPH3 domain containing protein-like (AHRD V1 *-*- Q8GVF8_ORYSJ); contains Interpro domain(s) IPR007679 Protein of unknown function DUF569 "	-1.44501	-2.28903	-8.93378	-12.6611
Solyc01g010430.2.1	0.517685	235.65	154.41	0.836367	285.37	284.85	0.00319	98.6	47.43	3.44e-05	60.09	55.32	"cDNA clone J023121M11 full insert sequence (AHRD V1 **-- B7F743_ORYSJ); contains Interpro domain(s) IPR007679 Protein of unknown function DUF569 "	-1.29291	1.08506	-3.79163	-4.96225
Solyc01g010540.2.1	0.0401412	40.68	40.05	0.463393	70.9	60.36	0.862792	106.57	86.87	0.726962	105.66	103.51	"Ribosomal protein (AHRD V1 ***- B3TM27_ELAGV); contains Interpro domain(s) IPR002942 RNA-binding S4 IPR018079 Ribosomal protein S4, conserved site IPR001912 Ribosomal protein S4 "	-2.04466	-1.3025	1.06952	1.12224
Solyc01g010660.2.1	1.43e-06	22.68	5.66	0.0305445	72.85	53.62	6.2e-05	33.65	8.13	4.69e-08	17.55	23.29	"Receptor-like protein kinase At3g21340 (AHRD V1 **** RLK6_ARATH); contains Interpro domain(s) IPR002290 Serine/threonine protein kinase "	-9.17913	-2.18327	-6.90196	-7.3019
Solyc01g010700.2.1	0.256399	5.06	3.33	0.015273	10.52	5.72	1	2.02	1.98	1	2.15	1.35	"AKIN gamma (AHRD V1 **-- B4FX20_MAIZE); contains Interpro domain(s) IPR000644 Cystathionine beta-synthase, core "	2.75516	5.07767	1.24604	1.0715
Solyc01g010710.2.1	0.16181	15.38	18.32	0.0328878	31.53	17.29	0.106382	24.83	15.64	0.0439673	19.44	24.84	"Serine carboxypeptidase 1 (AHRD V1 **** B6U0V5_MAIZE); contains Interpro domain(s) IPR001563 Peptidase S10, serine carboxypeptidase "	1.72459	2.41172	1.89927	2.01695
Solyc01g010750.2.1	0.0947285	176.71	136.54	0.0359575	165.22	220.31	0.186613	156.56	157.84	0.290831	127.98	153.13	"Stress responsive protein (AHRD V1 *--- B6STP1_MAIZE); contains Interpro domain(s) IPR008997 Ricin B-related lectin "	1.75499	2.08735	1.599	1.39342
Solyc01g010770.2.1	0.0803602	4.91	3.9	0.0361535	5.76	5.23	1	1.35	1.23	1	2.32	1.14	"Spfh domain / band 7 family protein (AHRD V1 **-- B4AS86_FRANO); contains Interpro domain(s) IPR001107 Band 7 protein "	4.78775	5.76249	1.38265	1.76531
Solyc01g010920.1.1	0.151481	3.84	2.64	0.518783	1.76	7.68	0.208689	3.27	4.52	0.0427938	1.73	3.77	"Os03g0169000 protein (Fragment) (AHRD V1 ***- Q0DUS7_ORYSJ); contains Interpro domain(s) IPR004348 Protein of unknown function DUF246, plant "	-2.16688	-1.54473	-1.98677	-2.85055
Solyc01g011350.2.1	0.0449228	40.94	34.47	0.247386	26.31	33.6	0.255735	13.73	11.98	0.381202	14.43	15.7	cDNA clone J013057D02 full insert sequence (AHRD V1 **-- B7EBX1_ORYSJ)	2.08234	1.60329	-1.53707	-1.35078
Solyc01g011430.2.1	7.13e-05	29.4	35.8	0.282529	10.67	12.4	0.00898	1	0.87	0.0496185	2.62	1.76	"Diacylglycerol O-acyltransferase (AHRD V1 ***- A5UWY0_ROSS1); contains Interpro domain(s) IPR009721 Protein of unknown function DUF1298 "	4.82989	1.67407	-6.91759	-3.27369
Solyc01g014140.2.1	0.654836	4.48	3.08	0.684776	1.71	5.97	0.01213	0.64	0.49	0.0389187	1.24	1.47	Hcr9-9D (AHRD V1 ***- O50021_SOLPI)	-1.35256	-1.37208	-8.2297	-3.98665
Solyc01g014230.2.1	0.227492	11.36	13.28	0.03014	9.64	7.5	0.349974	15.36	14.94	0.230288	15.84	14.29	"U-box domain-containing protein 4 (AHRD V1 **-- PUB4_ARATH); contains Interpro domain(s) IPR011989 Armadillo-like helical "	-1.6053	-2.36939	-1.42873	-1.47707
Solyc01g014840.2.1	0.365421	42.84	25.55	0.71692	50.46	37.27	0.00654	23.49	7.29	0.000349	16.11	14.21	Tir-nbs-lrr, resistance protein	-1.41939	-1.15686	-3.44642	-3.62002
Solyc01g015050.1.1	1	0	0	0.024707	12.13	0	1	0	0	1	0	0	Unknown Protein (AHRD V1)	1	46.5627	1	1
Solyc01g015080.2.1	0.376771	181.41	209.1	0.0582657	26.28	95.62	9.18e-05	6.51	35.73	1.97e-06	34.37	19.55	"Peroxidase (AHRD V1 ***- D7LZC8_ARALY); contains Interpro domain(s) IPR002016 Haem peroxidase, plant/fungal/bacterial "	1.36291	-2.38658	-7.44447	-5.9718
Solyc01g016470.2.1	0.0441782	32.8	39.29	0.748332	53.56	80.27	0.879577	82.34	68.55	0.670368	98.18	91.98	"Unknown Protein (AHRD V1); contains Interpro domain(s) IPR001813 Ribosomal protein 60S "	-2.03793	-1.12641	-1.0633	1.14953
Solyc01g017600.2.1	5.65e-06	1.12	0	0.0178775	5.88	2.49	0.00772	7.25	1.93	0.00172	1.72	5.99	"Plant viral-response family protein (AHRD V1 **-- B6SQA7_MAIZE); contains Interpro domain(s) IPR006904 Protein of unknown function DUF716 "	-19.6724	-3.25417	-3.14489	-3.83323
Solyc01g020190.2.1	1	4.7	2.78	0.556855	2.22	1.21	0.133355	0.35	0.8	0.0313931	0	0.18	"Membrane-associated ring finger 6 (AHRD V1 *--- B3VKM1_PIG); contains Interpro domain(s) IPR011016 Zinc finger, RING-CH-type "	1.24421	-1.74754	-4.78446	-15.5273
Solyc01g020410.1.1	0.00828	3.58	8.89	0.0863168	3.85	3.37	1	0.05	0	1	0.53	0.18	Unknown Protein (AHRD V1)	12.4026	7.13769	-3.47699	-1.14946
Solyc01g021600.2.1	0.817394	3.31	5.68	0.548776	3.61	7.68	0.00186	31.26	10.73	9.42e-07	30.84	28.64	"Disease resistance response protein (AHRD V1 ***- A8IXC7_BRACM); contains Interpro domain(s) IPR004265 Plant disease resistance response protein "	1.22408	1.48915	5.15814	7.05699
Solyc01g028800.1.1	0.0182046	3.47	3.59	0.50512	1.35	1.18	0.12531	2.04	2.57	0.250229	1.38	1.88	"Pumilio-family RNA binding protein (AHRD V1 *-*- A8N273_COPC7); contains Interpro domain(s) IPR011989 Armadillo-like helical "	20.4648	7.65704	12.9116	9.18596
Solyc01g028830.2.1	0.00314	46.21	50.06	0.0264008	44.94	32.89	0.932393	16.74	17.42	1	17.1	15.81	"ATP binding / serine-threonine kinase (AHRD V1 **** C5DB71_VITVI); contains Interpro domain(s) IPR002290 Serine/threonine protein kinase "	3.24472	2.53664	1.05946	-1.00546
Solyc01g044240.2.1	1	1.84	1.59	0.226013	2.08	5.2	0.00876	5.67	7.94	0.00751	6.23	7.34	Unknown Protein (AHRD V1)	1.64539	3.26976	5.6833	5.52591
Solyc01g049650.2.1	1	20.39	22.86	1	29.27	17.07	0.0350557	53	53.92	0.0612128	41.38	52.77	"Pyruvate kinase (AHRD V1 ***- B9SBM7_RICCO); contains Interpro domain(s) IPR001697 Pyruvate kinase "	-1.00064	1.03488	2.25413	1.93452
Solyc01g050040.2.1	0.570742	17.51	11.81	0.316245	7.79	17.69	0.0709977	11.14	9.94	0.0178687	8.16	9.77	"RING finger protein 13 (AHRD V1 *-*- RNF13_CHICK); contains Interpro domain(s) IPR018957 Zinc finger, C3HC4 RING-type "	-1.30621	-1.54907	-1.98777	-2.3942
Solyc01g056850.2.1	0.246427	3.97	2.95	1	6.24	8.57	0.0532179	23.59	13.06	0.00726	25.13	17.8	"CTP synthase (AHRD V1 ***- B6U7R1_MAIZE); contains Interpro domain(s) IPR004468 CTP synthase "	-2.01694	1.0115	2.33874	2.64588
Solyc01g057080.1.1	1.1e-10	0	0	0.000928	4.39	7.68	3.39e-08	2.2	1.27	2.16e-08	4.2	0.77	"Ethylene-responsive transcription factor 13 (AHRD V1 *-*- ERF99_ARATH); contains Interpro domain(s) IPR001471 Pathogenesis-related transcriptional factor and ERF, DNA-binding "	-184.754	-3.96808	-13.8844	-10.2106
Solyc01g057460.2.1	0.0190365	38.58	57.94	0.00384	44.17	35.2	0.229031	64.53	88.31	0.0187235	68.19	44.34	CTV.22 (AHRD V1 ***- Q8H6Q7_PONTR)	-2.26137	-2.82382	-1.55863	-2.17844
Solyc01g057770.2.1	0.711413	91.99	68.06	0.00999	235.89	170.96	0.224294	268.43	34.3	0.0638624	114.53	208.16	"AE family transporter anion exchange (AHRD V1 *--* A4RY02_OSTLU); contains Interpro domain(s) IPR003020 Bicarbonate transporter, eukaryotic "	1.17063	2.85056	2.032	2.09436
Solyc01g057910.2.1	0.79254	35.31	19.47	0.835931	12.75	33.13	3.86e-07	2.68	3.66	1.09e-08	3.51	1.53	"MYB transcription factor (AHRD V1 **** Q39550_CRAPL); contains Interpro domain(s) IPR015495 Myb transcription factor "	1.10903	-1.11142	-8.30319	-10.6196
Solyc01g058100.2.1	6.28e-05	25.33	20.85	0.000833	11.31	44.63	1	7.64	1.41	0.155017	9.64	7.83	Unknown Protein (AHRD V1)	5.82892	6.90281	1.06968	1.97581
Solyc01g058260.2.1	0.00699	50.15	35.06	0.108913	77.11	61.73	0.0239391	64.28	42.38	0.00532	50.33	50.36	"Poly(A) polymerase (AHRD V1 ***- Q56XM9_ARATH); contains Interpro domain(s) IPR007012 Poly(A) polymerase, central region "	-2.9195	-1.86909	-2.5658	-2.80228
Solyc01g058320.2.1	0.436902	18.63	19.42	0.00856	41.17	43.9	0.184837	36.84	17.94	0.280551	26.32	20.52	T6A9.7 protein (AHRD V1 *-*- Q9FZ23_ARATH)	1.36061	2.93509	1.79193	1.48585
Solyc01g058670.2.1	0.00338	57.4	62.09	0.162286	33.45	41.98	0.680924	28.48	26.44	0.210132	36.3	37.32	Transcription factor (AHRD V1 *-** D7L4N5_ARALY)	2.811	1.72723	1.18481	1.54264
Solyc01g058720.2.1	0.00111	54.71	43.95	0.00233	62.43	44.26	0.0241441	91.01	41.48	3.16e-05	49.52	39.04	"NaCl-inducible Ca2+-binding protein (AHRD V1 **-* O22368_ARATH); contains Interpro domain(s) IPR011992 EF-Hand type "	-3.06124	-2.94547	-2.49341	-3.86331
Solyc01g059860.2.1	0.027959	17.39	15.27	0.419254	13.01	9.34	0.24835	11.15	13.58	0.138317	14.99	11.86	"Kinase family protein (AHRD V1 ***- D7L5X4_ARALY); contains Interpro domain(s) IPR002290 Serine/threonine protein kinase "	2.34355	1.55622	1.62314	1.71207
Solyc01g059880.2.1	0.110438	77.09	82.79	0.0298545	80.46	46.82	0.0555408	79.64	67.78	0.0148663	76.15	65.04	"ATP citrate lyase a-subunit (AHRD V1 **** Q93YH4_LUPAL); contains Interpro domain(s) IPR016141 Citrate synthase-like, core "	-1.68709	-2.19691	-1.99897	-2.15183
Solyc01g059900.2.1	0.0218764	89.2	134.05	0.0164287	82.94	183.69	4.55e-10	2.21	1.58	8.34e-08	4.01	7.64	"Dirigent-like protein (AHRD V1 ***- A6YR04_PICSI); contains Interpro domain(s) IPR004265 Plant disease resistance response protein "	2.26633	2.66695	-26.405	-9.22099
Solyc01g059950.1.1	0.0459113	4.19	4.11	0.39365	1.6	2.34	1	1.07	0.86	0.625229	1.95	1.16	"GAI-like protein 1 (Fragment) (AHRD V1 *--- A1YWX1_9ROSI); contains Interpro domain(s) IPR005202 GRAS transcription factor "	9.54898	4.56831	2.2736	3.41045
Solyc01g059960.1.1	4.62e-05	8.17	9.77	0.137635	1.64	2.78	1	0	0	1	0.34	0.07	"GAI-like protein 1 (Fragment) (AHRD V1 **-- A1YWM9_9ROSI); contains Interpro domain(s) IPR005202 GRAS transcription factor "	70.6451	17.9262	1	2.48835
Solyc01g059980.2.1	0.00033	6.96	21.13	4.53e-07	7.53	3.15	0.116874	116.99	288.18	0.167154	37.43	67.08	"Beta-glucanase (AHRD V1 ***- Q53X08_NICPL); contains Interpro domain(s) IPR000490 Glycoside hydrolase, family 17 "	-6.14304	-16.2556	2.14431	-1.83171
Solyc01g059990.2.1	0.00597	1.45	3.15	0.00428	3.14	0.54	0.774644	6.74	21.32	0.406506	13.67	2	"Serine/threonine-protein phosphatase 7 long form homolog (AHRD V1 *--- PPP7L_ARATH); contains Interpro domain(s) IPR019557 Aminotransferase-like, plant mobile domain "	-4.52039	-5.73829	1.1773	-1.55539
Solyc01g060020.2.1	0.00056	7.51	20.07	0.000308	15.72	10.53	0.873818	34.48	118.3	0.354427	78.56	10.13	"Beta-glucanase (AHRD V1 ***- Q53X08_NICPL); contains Interpro domain(s) IPR000490 Glycoside hydrolase, family 17 "	-4.63176	-4.97042	1.08887	-1.63576
Solyc01g060130.2.1	0.0452066	16.37	21.04	0.218124	15.04	14.16	0.134926	16.97	16.45	0.0722276	17.64	18.54	"ADP-ribosylation factor-like protein 3 (AHRD V1 **-- ARL3_CAEEL); contains Interpro domain(s) IPR006687 GTP-binding protein SAR1 "	2.27864	1.73303	1.86665	1.96214
Solyc01g060180.2.1	0.00254	79.24	79.8	0.358315	38.79	42.84	0.480496	23.63	22.92	0.321957	23.96	20.38	"AMP-dependent synthetase and ligase (AHRD V1 ***- A1U2F4_MARAV); contains Interpro domain(s) IPR000873 AMP-dependent synthetase and ligase "	2.85056	1.42047	-1.30735	-1.41221
Solyc01g060240.2.1	0.00465	16.53	23.12	0.0378999	18.41	31.39	0.330169	32.29	49.97	0.0814187	38.18	31.55	"Unknown Protein (AHRD V1); contains Interpro domain(s) IPR012482 Lg106-like "	-2.74588	-2.23844	-1.45203	-1.75714
Solyc01g060260.2.1	0.0459374	7.04	9.22	0.412766	8.86	2.19	0.00142	15.77	10.81	4.18e-05	16.37	16.74	Unknown Protein (AHRD V1)	3.27858	2.15802	4.89452	5.92404
Solyc01g060410.2.1	0.714016	0.56	1.07	0.78881	2.32	4.23	0.0427112	7.9	6.83	0.00518	9.21	9.82	Unknown Protein (AHRD V1)	-2.35532	1.49262	3.07602	3.84523
Solyc01g065490.2.1	0.098864	18.64	10.85	0.0390109	12.83	28.03	0.585131	5.55	6.43	0.560785	6.41	6.22	"Aldo/keto reductase (AHRD V1 **-- A2Q5A8_MEDTR); contains Interpro domain(s) IPR001395 Aldo/keto reductase "	1.98608	2.66514	-1.34702	-1.31598
Solyc01g065500.2.1	0.734375	2.58	2.34	1	3.41	0.77	0.0245727	7.63	6.01	0.0496185	6.8	6.8	"Phosphoribosylanthranilate transferase (Fragment) (AHRD V1 *--- Q43085_PEA); contains Interpro domain(s) IPR013583 Phosphoribosyltransferase C-terminal, plant "	1.46733	1.21999	3.61664	3.51151
Solyc01g065510.2.1	0.0217501	24.34	19.2	0.000622	36.05	39.04	0.00148	78.69	21.86	3.29e-05	40.4	64.83	Unknown Protein (AHRD V1)	2.44322	4.07027	5.19123	5.24495
Solyc01g065530.2.1	0.147902	399.38	218.81	0.021934	458.26	409.43	0.28442	185.59	36.9	0.0117873	69.16	93.12	"COBRA-like protein (AHRD V1 ***- Q655F2_ORYSJ); contains Interpro domain(s) IPR006918 Glycosyl-phosphatidyl inositol-anchored, plant "	1.75773	2.35602	-1.73317	-2.46144
Solyc01g065550.2.1	0.0330594	12.79	15.51	0.0738787	14.64	16.68	0.0175526	13.93	13.08	0.00289	13.2	11.21	"Protein DEHYDRATION-INDUCED 19 homolog 4 (AHRD V1 ***- DI194_ARATH); contains Interpro domain(s) IPR008598 Drought induced 19 "	-2.18586	-2.03481	-2.50051	-2.84336
Solyc01g065690.2.1	0.270204	8.26	6.34	0.037538	2.95	5.15	0.0879165	5.46	6.61	0.0180148	3.76	5.86	"Heavy-metal associated domain protein (AHRD V1 *--- C3SA91_BRADI); contains Interpro domain(s) IPR006121 Heavy metal transport/detoxification protein "	-1.58038	-2.89964	-2.08417	-2.67139
Solyc01g065700.2.1	0.000965	160.81	154.94	0.705933	25.94	76.91	2.99e-06	4.4	3.33	4.31e-05	8.77	5.63	"Integrin-linked kinase-associated serine/threonine phosphatase 2C (AHRD V1 **** ILKAP_BOVIN); contains Interpro domain(s) IPR015655 Protein phosphatase 2C "	3.82252	1.21903	-11.3265	-6.36722
Solyc01g065840.2.1	0.131321	12.37	10.56	0.0352825	11.23	19.96	0.20541	11.23	10.91	0.231734	12.01	10.13	"F-box/LRR-repeat protein At3g03360 (AHRD V1 *-*- FBL42_ARATH); contains Interpro domain(s) IPR001810 Cyclin-like F-box "	2.00147	2.63919	1.76662	1.71874
Solyc01g065980.2.1	0.0133241	55.05	59.99	0.26852	116.61	64.61	0.696879	135.55	195.71	0.231025	81.61	116.62	"Ethylene responsive transcription factor 2b (AHRD V1 *-** C0J9I6_9ROSA); contains Interpro domain(s) IPR001471 Pathogenesis-related transcriptional factor and ERF, DNA-binding "	-2.26441	-1.49274	1.15731	-1.47384
Solyc01g066260.2.1	0.623975	19.71	10.29	1	11.92	13.33	0.0222262	5.01	4.15	0.00506	4.04	3.53	Unknown Protein (AHRD V1)	1.29697	1.05291	-2.72385	-3.36285
Solyc01g066290.2.1	0.0435008	4.88	4.23	0.0682756	2.48	6.5	0.0357503	4.32	5.62	0.237362	9.37	6.7	Unknown Protein (AHRD V1)	-2.51185	-2.62184	-2.52033	-1.61874
Solyc01g066310.2.1	0.0241633	48.82	44.15	0.196646	31.95	39.39	0.898444	25.28	23.26	1	22.79	24.44	"Acyl-CoA dehydrogenase (AHRD V1 *-** A6F634_9ALTE); contains Interpro domain(s) IPR009100 Acyl-CoA dehydrogenase/oxidase, middle and N-terminal "	2.25085	1.67458	1.07463	1.0177
Solyc01g066430.2.1	0.030157	251.14	236.13	0.499906	84.49	204.26	0.76936	127.67	72.11	0.106829	65.61	61.45	"Ring H2 finger protein (AHRD V1 *-*- D9ZHD8_HYPPE); contains Interpro domain(s) IPR018957 Zinc finger, C3HC4 RING-type "	2.34178	1.35528	-1.1369	-1.84549
Solyc01g066700.2.1	0.371366	2.63	4.1	0.536496	3.13	4.2	0.00663	0.48	0.46	0.21123	4.16	1.95	"Bifunctional polymyxin resistance protein ArnA (AHRD V1 **-- ARNA_SALPC); contains Interpro domain(s) IPR016040 NAD(P)-binding domain "	-1.64215	-1.55452	-10.3271	-2.02155
Solyc01g066710.2.1	0.571513	2.36	1.89	0.584313	2.7	1.18	0.0707649	0.3	0.52	0.0393201	0.25	0.99	Unknown Protein (AHRD V1)	-1.72435	-1.93952	-7.78902	-5.82137
Solyc01g066720.2.1	0.00709	68.99	50.84	0.0684548	92.04	76.79	0.764427	95.36	293.69	0.0400613	89.48	92.56	"Hypoxia induced protein conserved region containing protein (AHRD V1 ***- B6UCX6_MAIZE); contains Interpro domain(s) IPR007667 Hypoxia induced protein conserved region "	-2.55724	-1.88982	1.14056	-1.90789
Solyc01g066740.2.1	0.698474	0.82	2.91	0.702393	2.59	1.19	0.00982	8.31	4.97	0.013123	5.11	7.89	"Transducin family protein (Fragment) (AHRD V1 *--- D7L607_ARALY); contains Interpro domain(s) IPR017986 WD40 repeat, region "	1.93564	1.91013	6.06727	5.78766
Solyc01g066760.2.1	0.590094	0.91	3.05	0.80079	2.9	2.41	0.0152301	17.95	9.73	0.0152209	13.21	11.68	Unknown Protein (AHRD V1)	-1.86518	-1.44743	3.27089	2.84756
Solyc01g066860.2.1	0.190908	7.95	4.86	0.914404	11.28	14.67	0.000904	44.2	52.17	0.00493	34.05	35.99	Unknown Protein (AHRD V1)	-1.76555	1.0997	3.81293	2.70335
Solyc01g066910.2.1	1	0.14	0	0.504585	0.51	1.11	4.54e-05	5.11	16.11	1.02e-06	8.76	17.05	"PVR3-like protein (AHRD V1 ***- B6TYX6_MAIZE); contains Interpro domain(s) IPR003612 Plant lipid transfer protein/seed storage/trypsin-alpha amylase inhibitor "	1.53746	7.16984	79.6365	96.1094
Solyc01g066970.2.1	0.494689	609	360.35	0.934455	220.46	526.63	4.97e-09	35.96	27.52	2.01e-11	30.72	32.61	Flowering promoting factor-like 1 (Fragment) (AHRD V1 *--- A6MZJ6_ORYSI)	1.29474	-1.03603	-12.993	-13.408
Solyc01g066980.2.1	0.0466966	387.87	261.59	0.462158	98.09	339.76	1.44e-05	22.79	27.76	1.07e-07	21.23	20.15	Flowering promoting factor-like 1 (Fragment) (AHRD V1 *--- A6MZJ6_ORYSI)	2.15626	1.41452	-6.56153	-8.2227
Solyc01g067000.2.1	0.322898	82.64	73.82	0.12511	59.76	72.01	0.0401934	50.99	62.19	0.000546	42.65	38.12	"SRC2 homolog (Fragment) (AHRD V1 *-*- B3IYJ9_9SOLA); contains Interpro domain(s) IPR018029 C2 membrane targeting protein "	-1.3935	-1.70837	-2.11706	-3.04567
Solyc01g067010.2.1	0.247135	18.84	13.91	0.278693	10.09	25.84	0.897264	13.67	7.18	0.0277773	4.88	3.7	"F-box family protein (AHRD V1 **-- B9HCS6_POPTR); contains Interpro domain(s) IPR017451 F-box associated type 1 "	1.57752	1.68144	-1.08535	-2.66591
Solyc01g067020.2.1	0.773624	27.21	18.81	0.518154	20.52	21.13	0.000135	7.91	4.49	1.37e-05	7.81	3.61	Receptor like kinase, RLK	-1.14282	-1.30932	-4.58646	-5.12434
Solyc01g067120.2.1	0.112215	38.59	29.26	0.110117	27.56	40	0.00287	24.69	13.71	0.000474	21.8	16.52	"Cullin 1-like protein C (AHRD V1 ***- A0ELU7_PETIN); contains Interpro domain(s) IPR016159 Cullin repeat-like "	-1.79916	-1.86766	-3.47637	-3.599
Solyc01g067130.2.1	0.450844	30.66	34.06	0.622793	24.03	37.8	0.0251624	10.69	8.5	0.00615	10.65	6.52	"Nuclear transcription factor Y subunit B-3 (AHRD V1 **** B6SUG8_MAIZE); contains Interpro domain(s) IPR003957 Transcription factor, CBFA/NFYB, DNA topoisomerase "	1.36174	1.26728	-2.67688	-3.0779
Solyc01g067300.2.1	0.0034	252.91	170.76	0.325846	96.63	112.11	0.392845	112.56	101.03	0.199605	119.21	125.47	"UPF0497 membrane protein 13 (AHRD V1 ***- U497D_SOYBN); contains Interpro domain(s) IPR006459 Uncharacterised protein family UPF0497, trans-membrane plant subgroup "	3.06393	1.4534	1.40032	1.56009
Solyc01g067330.2.1	3.4e-08	18.07	25.38	1.42e-08	17.39	20.31	1.55e-11	6.39	11.63	1.71e-12	15.92	9.47	"UPF0497 membrane protein 4 (AHRD V1 ***- U4974_VITVI); contains Interpro domain(s) IPR006459 Uncharacterised protein family UPF0497, trans-membrane plant subgroup "	-7.72023	-9.12006	-20.1669	-14.7851
Solyc01g067360.2.1	0.00217	26.17	18.16	0.389064	7.76	11.87	0.724149	6.28	9.42	1	8.01	5.98	"CHY zinc finger family protein expressed (AHRD V1 ***- Q2QP88_ORYSJ); contains Interpro domain(s) IPR008913 Zinc finger, CHY-type "	3.69431	1.59274	1.20403	1.04773
Solyc01g067370.2.1	1.77e-12	133.1	172.71	0.000423	27.43	64.11	0.00103	0.75	1.29	0.116146	6.51	2.21	Pollen-specific lysine-rich protein SBgLR (AHRD V1 *--- Q6JLA6_SOLTU)	18.1277	5.33697	-7.93993	-2.10064
Solyc01g067400.2.1	0.203623	16.42	20.88	0.274896	20.27	16.92	0.0432606	25.19	27.03	0.0184584	29.88	28.5	"Serine/threonine-protein kinase (AHRD V1 **** C6ZRV0_SOYBN); contains Interpro domain(s) IPR002290 Serine/threonine protein kinase "	1.61711	1.56569	2.07047	2.24943
Solyc01g067510.2.1	0.287143	1.63	7.18	0.397758	5.22	1.66	0.0110071	9.76	6.4	0.000537	10.07	11.61	"Receptor-like kinase (AHRD V1 **** A7VM36_MARPO); contains Interpro domain(s) IPR002290 Serine/threonine protein kinase "	2.88494	2.21835	4.83084	6.27701
Solyc01g067550.2.1	0.487056	5.93	9.11	0.456882	11.98	6	0.00907	17.31	17.34	0.00406	17.24	18.7	"Zinc finger CCCH domain-containing protein 58 (AHRD V1 ***- C3H58_ARATH); contains Interpro domain(s) IPR000571 Zinc finger, CCCH-type "	1.38135	1.59883	2.8907	2.9144
Solyc01g067620.2.1	0.000307	13.97	28.01	0.0334798	52.13	26.02	0.0160914	34.96	40.95	0.0212754	41.18	47.63	"1-aminocyclopropane-1-carboxylate oxidase (AHRD V1 **-- ACCO_MUSAC); contains Interpro domain(s) IPR005123 Oxoglutarate and iron-dependent oxygenase "	-4.33573	-2.40289	-2.60893	-2.28743
Solyc01g067690.2.1	0.0490412	1.63	0.75	0.348676	2.23	3.25	1	5.69	4.9	1	6.32	5.56	Unknown Protein (AHRD V1)	-3.85528	-1.82085	-1.02053	1.06632
Solyc01g067750.2.1	0.184503	34.67	71.2	0.0495747	49.77	35.6	0.51822	63.78	83.93	0.246035	65.58	65.47	"Shikimate dehydrogenase (AHRD V1 ***- B6TSW1_MAIZE); contains Interpro domain(s) IPR001381 Dehydroquinase class I "	-1.65688	-2.09983	-1.2877	-1.48916
Solyc01g067790.2.1	0.769254	2.02	1.88	0.780405	3.13	1.12	0.0687692	7.66	9.51	0.0365694	10.2	8.55	"Mediator of DNA damage checkpoint protein 1 (AHRD V1 *--- MDC1_PIG); contains Interpro domain(s) IPR001357 BRCT "	-1.49283	-1.421	2.56487	2.7192
Solyc01g067850.2.1	0.105296	5.72	6.32	1	1.48	1.76	3.37e-06	25.5	17.67	2.34e-08	24.81	32.19	"Peroxidase (AHRD V1 **** Q07446_SOLLC); contains Interpro domain(s) IPR002016 Haem peroxidase, plant/fungal/bacterial "	3.29495	-1.10327	10.682	13.7181
Solyc01g067860.2.1	0.650612	0.06	3.6	0.394626	2.26	1.52	1.32e-13	63.47	94.93	1.59e-14	56.17	103.4	"Peroxidase 24 (AHRD V1 **** B6SRH9_MAIZE); contains Interpro domain(s) IPR002016 Haem peroxidase, plant/fungal/bacterial "	3.38035	3.40899	127.091	126.057
Solyc01g067870.2.1	0.021911	0	10.2	0.135706	2.46	1.95	0.0627585	3.67	2.1	0.500152	0.92	1.19	"Peroxidase 24 (AHRD V1 **** B6SRH9_MAIZE); contains Interpro domain(s) IPR002016 Haem peroxidase, plant/fungal/bacterial "	15.4793	6.92487	8.54391	3.28843
Solyc01g067890.2.1	0.0311253	19.14	17.49	0.143697	13.8	16.03	0.0527216	13.49	24.76	0.142466	15.4	14.89	"1-deoxy-D-xylulose 5-phosphate synthase 1 (AHRD V1 ***- C7U110_SOLLC); contains Interpro domain(s) IPR005474 Transketolase, N-terminal IPR005475 Transketolase, central region IPR005477 Deoxyxylulose-5-phosphate synthase "	2.34757	1.85778	2.23232	1.72272
Solyc01g068000.2.1	0.941819	45.08	30.03	0.370507	53.42	53.71	0.258032	33.81	14.8	0.0446485	16.75	21.89	"Serine/threonine phosphatase family protein (AHRD V1 **** C1E0J1_9CHLO); contains Interpro domain(s) IPR015655 Protein phosphatase 2C "	1.03729	1.42155	-1.63207	-2.11239
Solyc01g068110.2.1	0.0356602	1.99	3.81	1	0.08	0	1	0	0	1	0	0.02	Unknown Protein (AHRD V1)	23.5199	1.29079	1	1.08878
Solyc01g068140.2.1	0.363764	2.84	4.18	0.377891	4.35	2.83	4.44e-05	14.42	17.39	0.00464	8.73	10.27	"10-deacetylbaccatin III-10-O-acetyl transferase-like (AHRD V1 **-* Q9FTH0_ORYSJ); contains Interpro domain(s) IPR003480 Transferase "	2.11862	2.1049	8.56925	5.01589
Solyc01g068190.2.1	0.117168	5.95	3.77	0.0295207	3.66	12.96	1	2.48	1.62	1	2.97	2.11	Unknown Protein (AHRD V1)	2.72598	4.51177	1.0923	1.30149
Solyc01g068260.2.1	1	3.12	3.01	0.618707	4.02	1.66	0.0716577	9.74	10.81	0.0383941	11.01	10.13	"BRCT domain-containing protein (AHRD V1 *--- D3BB36_POLPA); contains Interpro domain(s) IPR001357 BRCT "	-1.25542	-1.39171	2.37459	2.37494
Solyc01g068280.2.1	0.77907	8.9	10.63	0.699846	12.06	9.02	0.0540928	18.65	19.72	0.0372807	18.92	19.84	"Chromodomain-helicase-DNA-binding protein 1-like (AHRD V1 *--- CHD1L_DANRE); contains Interpro domain(s) IPR000330 SNF2-related "	1.19437	1.25046	2.13497	2.09668
Solyc01g068380.2.1	0.0450209	59.06	60.33	0.528579	14.95	31.6	2.92e-07	1.61	4.78	1.81e-08	3.7	3.52	"Purple acid phosphatase (AHRD V1 *-** B6TKL3_MAIZE); contains Interpro domain(s) IPR004843 Metallophosphoesterase "	1.98387	-1.32159	-9.93256	-9.06489
Solyc01g068390.2.1	0.207987	19.31	21.06	0.0470931	17.48	13.47	0.376016	23.32	26.93	0.198152	22.49	24.05	"Zinc finger family protein (AHRD V1 ***- D7LSV3_ARALY); contains Interpro domain(s) IPR001841 Zinc finger, RING-type "	-1.58031	-2.12461	-1.39131	-1.54168
Solyc01g068410.2.1	0.034001	23.61	28.18	0.258172	3.85	9.96	0.78139	1.65	19.26	0.0312635	4.79	6.9	"Auxin Efflux Carrier (AHRD V1 **** Q673E6_MEDTR); contains Interpro domain(s) IPR004776 Auxin efflux carrier "	2.21741	-1.71096	-1.22129	-2.20441
Solyc01g068420.2.1	0.856402	0	5.83	0.834597	2.16	3.24	0.0279294	0.28	0	0.188368	1.97	0.43	"Os06g0207500 protein (Fragment) (AHRD V1 ***- Q0DDQ9_ORYSJ); contains Interpro domain(s) IPR004253 Protein of unknown function DUF231, plant "	-1.32197	-1.43473	-15.7639	-3.34132
Solyc01g068460.2.1	0.207792	66.74	59.86	0.0117995	42.91	37.69	0.213013	51.58	82.96	0.0246272	53.92	51.68	"Pathogen-induced calmodulin-binding protein (Fragment) (AHRD V1 *-*- Q8H6W8_PHAVU); contains Interpro domain(s) IPR012417 Calmodulin-binding, plant "	-1.54973	-2.51922	-1.60738	-2.09672
Solyc01g068490.2.1	0.140187	19.06	19.91	0.000847	6.87	9.33	2.03e-07	3.12	0.97	8.52e-08	2.68	2.86	"U-box domain-containing protein (AHRD V1 **-- Q1ENX4_MUSAC); contains Interpro domain(s) IPR011989 Armadillo-like helical "	-1.85408	-4.5517	-18.2154	-14.0638
Solyc01g068520.1.1	0.000487	5.72	7.5	0.00181	10.47	3.27	0.00063	7.5	7.94	0.0272826	2.04	7.49	Unknown Protein (AHRD V1)	21.476	21.6246	23.3395	14.2767
Solyc01g068560.2.1	0.0483462	8.29	8.02	0.0305781	10	3.68	0.900199	17.03	23.66	0.890826	21.38	19.81	Unknown Protein (AHRD V1)	-2.42747	-2.99917	-1.07778	-1.0915
Solyc01g068600.2.1	0.0351492	9.47	12.29	0.118443	18.62	6.42	0.75731	21.04	23.8	0.477262	19.86	21.5	Paladin-like protein (AHRD V1 **-- D0NS27_PHYIN)	-2.1838	-1.97004	-1.16498	-1.29561
Solyc01g068630.2.1	0.0286139	106.97	120.83	0.476351	56.93	88.69	1.12e-06	6.83	7.01	3.42e-06	13.44	8.4	"Pyrimidine 5&apos-nucleotidase (AHRD V1 ***- D3P8R6_DEFDS); contains Interpro domain(s) IPR010237 Pyrimidine 5-nucleotidase "	2.10143	1.31098	-8.4107	-5.52976
Solyc01g073640.2.1	0.0301165	8.27	20.72	0.713667	76.44	46.87	0.829078	101.34	41.61	0.605287	109.27	140.28	"Uncharacterized oxidoreductase Mb1385 (AHRD V1 ***- Y1385_MYCBO); contains Interpro domain(s) IPR002347 Glucose/ribitol dehydrogenase "	-5.40712	-1.30766	-1.18165	1.42929
Solyc01g073660.2.1	0.0132745	51.52	40.81	0.44983	24.19	28.19	0.599232	27.76	22.82	0.760762	26.86	20.25	"Uncharacterized MFS-type transporter C19orf28 (AHRD V1 **-- CS028_HUMAN); contains Interpro domain(s) IPR016196 Major facilitator superfamily, general substrate transporter "	2.47842	1.36081	1.23915	1.12013
Solyc01g073670.2.1	0.0122365	42.53	26.42	0.0192171	28.52	39.37	0.00679	64.51	28.87	0.00785	34.14	43.68	"Uncharacterized MFS-type transporter C19orf28 (AHRD V1 **-- CS028_HUMAN); contains Interpro domain(s) IPR016196 Major facilitator superfamily, general substrate transporter "	2.84105	2.6959	3.49744	2.83402
Solyc01g073680.2.1	0.00215	11.79	10.25	0.0144067	10.86	7.68	0.000239	21.58	10.09	0.001	11.42	11.55	"Non-specific lipid-transfer protein (AHRD V1 ***- C6TMC6_SOYBN); contains Interpro domain(s) IPR013770 Plant lipid transfer protein and hydrophobic protein, helical "	5.53836	4.51537	7.28175	5.14746
Solyc01g073710.2.1	0.0332163	15.91	12.96	0.318077	23.53	20.3	0.0648076	20.93	12.86	0.0414844	20.05	15	"Calcium-binding EF hand family protein (AHRD V1 ***- D7LKY8_ARALY); contains Interpro domain(s) IPR011992 EF-Hand type "	-2.16773	-1.48299	-2.029	-2.02035
Solyc01g073720.2.1	0.535915	306.49	157.82	0.142921	193.24	514.85	0.000217	54.74	28.29	4.07e-05	54.04	42.49	Unknown Protein (AHRD V1)	1.27427	1.87649	-4.83821	-4.3105
Solyc01g073730.2.1	0.00189	9.3	9.12	0.0341905	12.89	14.02	0.173718	14.18	24.15	0.362777	27.52	20.88	"Molybdenum cofactor biosynthesis protein A (AHRD V1 ***- D0MDU9_RHOM4); contains Interpro domain(s) IPR013483 Molybdenum cofactor biosynthesis protein A "	-3.20655	-2.27358	-1.70407	-1.38758
Solyc01g073740.2.1	0.0465191	43.64	57.9	0.0782944	68.14	40.09	0.3555	76.44	80.21	0.129038	68.98	70	"Citrate synthase (AHRD V1 ***- O24135_TOBAC); contains Interpro domain(s) IPR010109 Citrate synthase, eukaryotic "	-1.978	-1.91697	-1.39914	-1.62033
Solyc01g073780.2.1	0.0220563	8.73	12.89	0.00039	7.09	4.36	0.000807	7.44	8.34	0.0120353	13.27	11.12	"CHP-rich zinc finger protein-like (AHRD V1 *--- Q9LTY3_ARATH); contains Interpro domain(s) IPR011424 C1-like "	-2.33568	-4.49428	-3.47521	-2.326
Solyc01g073800.2.1	0.00354	5.47	9.04	0.0141006	7.29	11.46	0.923021	27.63	41.43	0.690965	36.65	25.61	"CHP-rich zinc finger protein-like (AHRD V1 **-- Q8H5Y9_ORYSJ); contains Interpro domain(s) IPR011424 C1-like "	-4.62361	-3.66948	-1.07456	-1.2261
Solyc01g073810.2.1	0.00228	3.4	10.78	0.00409	9.71	5.77	0.179976	19.96	20.01	0.509144	35.73	22.21	"DC1 domain containing protein (AHRD V1 **-- A8CCN1_TOBAC); contains Interpro domain(s) IPR011424 C1-like "	-4.91466	-4.61127	-1.90651	-1.36173
Solyc01g073820.2.1	0.00139	26.81	23.71	0.00491	29.68	27.74	0.032311	36.85	40.57	0.0562809	53.7	40.39	"CHP-rich zinc finger protein-like (AHRD V1 **-- Q9FNE5_ARATH); contains Interpro domain(s) IPR011424 C1-like "	-3.04324	-2.77315	-2.18437	-1.85255
Solyc01g073830.1.1	3.13e-09	5.46	8.72	0.00122	30.28	16.89	1.17e-05	14.06	16.47	4.56e-05	25.09	19.41	"CHP-rich zinc finger protein-like (AHRD V1 *--- Q8H5Y9_ORYSJ); contains Interpro domain(s) IPR011424 C1-like "	-10.9367	-3.43878	-5.59496	-3.96254
Solyc01g073860.2.1	0.0012	2.03	3.14	0.00135	3.91	0	0.927473	16.89	28.6	0.648007	30.39	32.76	"CHP-rich zinc finger protein (AHRD V1 **-- C8CBB1_WHEAT); contains Interpro domain(s) IPR011424 C1-like "	-8.24457	-11.1069	-1.07143	1.26263
Solyc01g073880.2.1	0.449504	9.99	12.62	0.200487	6.42	11.86	7.02e-06	1.52	1.55	9.21e-06	2.81	1.88	"CHP-rich zinc finger protein-like (AHRD V1 **-- Q9LRV1_ARATH); contains Interpro domain(s) IPR011424 C1-like "	-1.35968	-1.72107	-10.1956	-7.04313
Solyc01g073890.2.1	6.75e-05	21.23	18.65	0.00405	33.22	29.93	4.54e-06	17.9	7.82	7.78e-08	14.86	11.46	"CHP-rich zinc finger protein-like (AHRD V1 *--- Q9FJG5_ARATH); contains Interpro domain(s) IPR011424 C1-like "	-4.41332	-2.89155	-7.45013	-7.52695
Solyc01g073910.2.1	0.000371	14.15	9.22	0.00612	14.84	19.52	0.0237553	27.09	17.17	0.00763	22.2	22.22	"Homeobox-leucine zipper protein 14 (AHRD V1 *-*- D7LZT3_ARALY); contains Interpro domain(s) IPR003106 Leucine zipper, homeobox-associated "	-4.23138	-2.9894	-2.46427	-2.53066
Solyc01g073950.2.1	0.419692	20.93	21.06	0.195791	19.11	16.5	0.106372	20.89	11.06	0.0460086	15.84	16.23	"Bromodomain protein (AHRD V1 ***- B9N6H8_POPTR); contains Interpro domain(s) IPR001487 Bromodomain "	-1.36842	-1.66607	-1.95942	-2.01133
Solyc01g073970.2.1	0.0185879	9	13.89	0.655321	48.74	30.83	0.28215	118.84	91.28	0.165175	128.79	117.96	"Histone H3 (AHRD V1 ***- D8L9K7_WHEAT); contains Interpro domain(s) IPR000164 Histone H3 "	-4.41189	-1.31797	1.89856	2.16041
Solyc01g074000.2.1	0.0231092	5.5	12.42	0.725205	48.96	35.74	0.369642	117.36	102.83	0.286969	127.31	121.76	"Histone H3 (AHRD V1 ***- D8L9K7_WHEAT); contains Interpro domain(s) IPR000164 Histone H3 "	-5.96133	-1.30356	1.88492	2.06982
Solyc01g074020.2.1	0.748247	5.5	8.29	0.0308706	3.29	1.31	0.499544	5.86	6.87	0.472996	7.72	6.04	"Box C/D snoRNA (AHRD V1 *--- A6ZSU7_YEAS7); contains Interpro domain(s) IPR007529 Zinc finger, HIT-type "	-1.20773	-3.60818	-1.42387	-1.35608
Solyc01g074030.2.1	0.411707	31.38	100.6	0.00319	30.17	29.99	0.753858	76.96	100.41	0.863109	80.04	112.3	"Beta-glucosidase 01 (AHRD V1 ***- B5M9E4_SOLLC); contains Interpro domain(s) IPR013781 Glycoside hydrolase, subgroup, catalytic core "	-1.41792	-3.13705	-1.13461	-1.06944
Solyc01g074040.1.1	7.39e-05	17.61	17.04	0.035958	5.81	14.33	0.0627585	0	0.1	0.219179	1.04	0.36	"Beta-glucosidase 01 (AHRD V1 ***- B5M9E4_SOLLC); contains Interpro domain(s) IPR001360 Glycoside hydrolase, family 1 "	6.77329	3.85498	-15.4359	-3.44866
Solyc01g079100.2.1	1	0.1	0.87	1	1.34	0.84	0.00844	6.59	7.12	0.00241	8.04	7.81	"Palmitoyltransferase erf2 (AHRD V1 *-*- C5FZI1_NANOT); contains Interpro domain(s) IPR001594 Zinc finger, DHHC-type "	-1.41713	1.36589	7.39457	8.30077
Solyc01g079110.2.1	0.019934	3.31	13.1	0.919544	39.32	41.24	0.119616	132.68	111.61	0.0598723	154.19	139.85	"Histone H3 (AHRD V1 ***- D8L9K7_WHEAT); contains Interpro domain(s) IPR000164 Histone H3 "	-5.16954	-1.07893	2.64582	3.08794
Solyc01g079150.2.1	0.742134	2.75	11.37	0.857503	7.46	4.64	0.0213619	18.06	13.29	0.0120067	15.52	15.93	"AE family transporter anion exchange (AHRD V1 *--* A4RY02_OSTLU); contains Interpro domain(s) IPR003020 Bicarbonate transporter, eukaryotic "	1.36487	1.14665	2.7722	2.70016
Solyc01g079160.2.1	0.000223	29.53	23.87	0.0189187	7.91	36.42	0.0705929	1.45	0.82	0.126825	1.38	1.96	"GDSL esterase/lipase At1g09390 (AHRD V1 ***- GDL2_ARATH); contains Interpro domain(s) IPR001087 Lipase, GDSL "	5.17936	4.1789	-4.48427	-3.23484
Solyc01g079200.2.1	0.0575907	67.73	41.62	0.538859	121.07	60.27	0.0341161	71.19	19.9	0.0114943	59.5	49.19	"Gibberellin 2-oxidase (AHRD V1 **** A4GVL7_SOLLC); contains Interpro domain(s) IPR005123 Oxoglutarate and iron-dependent oxygenase "	-2.00326	-1.26962	-2.63428	-2.29449
Solyc01g079260.2.1	5.8e-08	12.73	11.25	0.00447	48.24	15.81	0.507971	168.34	121.08	0.625354	116.29	156.41	"WRKY transcription factor 4 (AHRD V1 ***- A7UGD1_SOLTU); contains Interpro domain(s) IPR003657 DNA-binding WRKY "	-8.49314	-3.34306	1.28681	1.18007
Solyc01g079340.2.1	0.686157	9.7	11.02	0.36704	13.3	14.29	0.0492129	19.29	19.97	0.0343255	19.93	22.72	"Receptor-like kinase (AHRD V1 *-*- A7VM33_MARPO); contains Interpro domain(s) IPR002290 Serine/threonine protein kinase "	1.22025	1.57406	2.10271	2.22059
Solyc01g079370.2.1	0.00434	4.36	9.04	0.638161	1.08	2.29	1	0.71	0.9	1	1.19	0.74	"GRAS transcription factor (Fragment) (AHRD V1 *--- A2Q2Y2_MEDTR); contains Interpro domain(s) IPR005202 GRAS transcription factor "	8.53272	2.21284	1.08146	1.23947
Solyc01g079380.1.1	6.16e-12	31.2	29.27	0.000679	4.95	9.71	1	0.1	0.19	1	0.28	0.43	"GRAS transcription factor (Fragment) (AHRD V1 **-* A2Q2Y2_MEDTR); contains Interpro domain(s) IPR005202 GRAS transcription factor "	118.538	28.5024	1.02928	1.75218
Solyc01g079390.2.1	0.0340584	28.01	24.26	0.121156	21.16	23.44	0.537358	16.41	17.09	0.644741	15.93	15.2	"Histone-lysine N-methyltransferase MEDEA (AHRD V1 *--- MEDEA_ARATH); contains Interpro domain(s) IPR001214 SET "	2.23448	1.84596	1.31009	1.18631
Solyc01g079410.2.1	0.0167761	33.9	26.71	0.300378	16.52	22.36	0.131495	29.06	19.58	0.0487658	23.57	30.31	"SMP-30/Gluconolaconase/LRE domain protein (AHRD V1 *-*- D2QD53_SPILD); contains Interpro domain(s) IPR011042 Six-bladed beta-propeller, TolB-like "	2.46544	1.53389	1.80705	1.94368
Solyc01g079500.2.1	0.079105	0.94	2.21	0.897805	9.54	6.23	0.0219712	21.16	21.16	0.00205	27.53	25.31	"DNA replication licensing factor (AHRD V1 **** Q2U020_ASPOR); contains Interpro domain(s) IPR008050 MCM protein 7 "	-4.02918	1.13275	2.83088	3.42499
Solyc01g079570.2.1	1	1.12	1.46	0.319351	3.47	2.55	0.00642	9.22	5.43	0.0658722	3.91	5.99	"Beta xylosidase (AHRD V1 ***- Q6RXY3_FRAAN); contains Interpro domain(s) IPR001764 Glycoside hydrolase, family 3, N-terminal "	1.44492	3.11075	6.99206	4.63747
Solyc01g079600.2.1	0.720872	37.51	24.92	0.360974	60.48	47.1	0.067901	26.11	7.14	0.0129767	17.18	14.96	"Lipase (AHRD V1 *-*- C1FIH0_9CHLO); contains Interpro domain(s) IPR002921 Lipase, class 3 "	-1.16208	1.42029	-2.38111	-2.54894
Solyc01g079660.2.1	0.000715	94.28	60.48	0.000104	109.94	92.51	0.13966	79.73	8.36	0.260018	23.67	32.38	Long cell-linked locus protein (AHRD V1 ***- Q946U8_MAIZE)	5.16665	6.47323	2.6885	1.6599
Solyc01g079670.2.1	0.00092	22.23	24.24	8.78e-05	45.81	26.88	0.0246193	34.62	8.59	0.0104517	13.91	23.4	Long cell-linked locus protein (AHRD V1 ***- B6SJT6_MAIZE)	4.05073	6.08678	3.45773	2.91261
Solyc01g079680.2.1	0.390741	12.98	23	0.171324	27.97	19.29	0.105463	28.44	25.03	0.0132624	39.81	31.77	"Ran GTPase activating protein (Fragment) (AHRD V1 **-* A7M8K5_NICBE); contains Interpro domain(s) IPR003590 Leucine-rich repeat, ribonuclease inhibitor subtype "	1.40414	1.79295	1.91794	2.48647
Solyc01g079750.2.1	0.294583	1.13	1.83	0.491074	5.78	7.44	0.0155484	14.84	13.81	0.00188	18.19	16.48	"Protein serine/threonine kinase (AHRD V1 *-** D3BP85_POLPA); contains Interpro domain(s) IPR015748 Mitogen activated protein kinase kinase kinase 3 "	-2.72658	1.49388	3.00679	3.52481
Solyc01g079830.2.1	0.0714069	0.23	0.21	0.239805	1.25	0	0.0369136	0.23	0.2	0.110609	0.95	0.63	Unknown Protein (AHRD V1)	-9.87231	-4.68567	-10.6651	-4.19879
Solyc01g079870.2.1	0.0209751	125.77	124.15	0.141541	125.92	75.75	0.872049	71.09	59.46	0.958088	61.3	66.6	"Nuclear transcription factor Y subunit C-2 (AHRD V1 *-** B4FLF9_MAIZE); contains Interpro domain(s) IPR003958 Transcription factor CBF/NF-Y/archaeal histone "	2.25141	1.74879	1.07546	1.02465
Solyc01g079880.2.1	1.35e-05	1015.02	788.68	0.0214132	260.67	592.86	0.565994	99	157.48	0.0697471	79.69	88.75	Asparagine synthetase (AHRD V1 *--- Q9ZST6_ARATH)	6.07585	2.79622	-1.27898	-1.99175
Solyc01g079920.2.1	0.0336942	0	1.21	0.131669	2.33	1.13	0.0241949	0.87	0.58	0.724868	9.61	3.09	"Xylanase inhibitor (Fragment) (AHRD V1 **-- Q53IQ4_WHEAT); contains Interpro domain(s) IPR001461 Peptidase A1 "	-10.009	-4.05249	-9.29322	-1.28084
Solyc01g079930.1.1	1	0	0	1	0	0	0.00204	5.75	4.96	0.00198	6.15	4.44	"Xylanase inhibitor (Fragment) (AHRD V1 **-- Q53IQ4_WHEAT); contains Interpro domain(s) IPR001461 Peptidase A1 "	-1.66477	-1.67553	24.0698	23.3791
Solyc01g079940.2.1	0.00403	10.12	16.17	0.102539	35.91	14.51	0.198941	132.97	103.25	0.14074	144.97	110.02	"Xylanase inhibitor (Fragment) (AHRD V1 **-- Q53IQ4_WHEAT); contains Interpro domain(s) IPR001461 Peptidase A1 "	-4.39498	-2.37975	1.86849	1.95059
Solyc01g079950.2.1	0.269503	11.7	8.23	0.039894	17.81	13.16	0.0947627	17.04	10.12	0.239242	8.8	12.53	"Xylanase inhibitor (Fragment) (AHRD V1 **-- Q53IQ3_WHEAT); contains Interpro domain(s) IPR001461 Peptidase A1 "	1.69298	2.52918	2.10236	1.60858
Solyc01g079960.2.1	0.0178933	6.77	13.47	0.050213	16.65	8.27	0.902044	36.37	52.74	0.750745	35.88	35.83	"Xylanase inhibitor (Fragment) (AHRD V1 **-- Q53IQ3_WHEAT); contains Interpro domain(s) IPR001461 Peptidase A1 "	-3.72924	-3.12247	1.07526	-1.18455
Solyc01g079980.2.1	4.86e-05	1.02	2.38	0.01304	9.19	15.34	0.512671	48.61	74.19	0.28108	44.69	49.59	"Xylanase inhibitor (Fragment) (AHRD V1 **-- Q53IQ3_WHEAT); contains Interpro domain(s) IPR001461 Peptidase A1 "	-50.1304	-7.52694	-1.62353	-2.16267
Solyc01g080010.2.1	0.0512682	2.19	2.94	0.687358	5.57	8.12	5.76e-05	56.56	55.42	3.89e-06	67.55	59.07	"Xylanase inhibitor (Fragment) (AHRD V1 **-- Q53IQ4_WHEAT); contains Interpro domain(s) IPR001461 Peptidase A1 "	-3.30594	-1.31448	5.76002	6.33501
Solyc01g080020.2.1	0.00141	3.43	2.31	0.0430818	10.78	8.05	0.00573	4.47	6.8	0.250001	30.72	8.03	"Xylanase inhibitor (Fragment) (AHRD V1 **-- Q53IQ4_WHEAT); contains Interpro domain(s) IPR001461 Peptidase A1 "	-12.4967	-4.07609	-7.15204	-2.19547
Solyc01g080070.2.1	0.299605	3.98	6.22	0.510877	22.62	11.04	0.0287981	45.95	32.68	0.0190322	34.73	47.97	"Copper chaperone (AHRD V1 *--- B6TJ24_MAIZE); contains Interpro domain(s) IPR006121 Heavy metal transport/detoxification protein "	-2.13465	1.47065	3.25164	3.32237
Solyc01g080080.2.1	0.0575003	42.22	34.47	0.0278845	36.28	58.77	0.606781	26.47	25.23	0.369403	30.18	29.54	"RING finger protein B (AHRD V1 *--- RNGB_DICDI); contains Interpro domain(s) IPR001841 Zinc finger, RING-type "	1.99671	2.39998	1.22744	1.37691
Solyc01g080090.2.1	0.0131747	14.21	20.69	0.169396	18.89	8.19	0.0137536	16.36	21.45	0.0216105	18.73	14.97	Zinc finger RING-type protein (AHRD V1 *-*- B3U2A9_CUCSA)	2.72058	2.04375	2.70298	2.34915
Solyc01g080130.2.1	0.420759	8.15	14.3	0.224976	15.26	12.36	0.0116657	30.73	17.63	0.00655	19.81	26.72	Unknown Protein (AHRD V1)	1.47827	1.76449	2.91349	2.72647
Solyc01g080200.2.1	0.01	24.02	27.2	0.166042	16.28	18.72	1	7.3	12.85	0.528599	9.63	7.03	At2g23590-like protein (Fragment) (AHRD V1 *-*- B2CXK6_CARAS)	2.60499	1.73401	-1.05972	-1.31527
Solyc01g080220.2.1	0.789859	136.27	139.26	0.918083	93.29	155.16	0.0120968	56.55	54.3	0.00229	59.85	48.06	"Dienelactone hydrolase family protein (AHRD V1 **-- D7L3C7_ARALY); contains Interpro domain(s) IPR002925 Dienelactone hydrolase "	1.09214	-1.042	-2.48832	-2.63407
Solyc01g080230.2.1	0.363609	9.75	10.48	0.00119	17.83	46.25	0.286458	5.29	2.42	0.526677	4.38	5.67	"Dienelactone hydrolase family protein (AHRD V1 **-- D7L3C7_ARALY); contains Interpro domain(s) IPR002925 Dienelactone hydrolase "	1.5353	4.71894	-1.82629	-1.45288
Solyc01g080280.2.1	0.00351	4.64	7.34	0.298332	21.11	20.67	0.946687	31.03	56.48	0.526127	65.31	55.06	"Glutamine synthetase (AHRD V1 ***- B5LAU9_CAPAN); contains Interpro domain(s) IPR008146 Glutamine synthetase, catalytic region "	-6.23775	-1.86237	1.05223	1.40999
Solyc01g080290.2.1	0.077119	3.28	3.01	0.606941	11.11	0.87	0.0109828	21.24	27.42	0.0102191	25.97	21.92	"Plasma membrane associated protein-like (AHRD V1 ***- Q8LG79_ARATH); contains Interpro domain(s) IPR008390 AWPM-19-like "	-2.58649	-1.44118	2.63747	2.52617
Solyc01g080340.2.1	0.0116936	10.51	17.74	0.000243	11.02	4.76	0.0240709	13.37	19.43	0.0107674	17.68	15.5	"BSD domain containing 1 (AHRD V1 *-*- A9JT15_DANRE); contains Interpro domain(s) IPR005607 BSD "	-2.54601	-4.66345	-2.39424	-2.42963
Solyc01g080400.2.1	0.0151932	15.72	13.62	0.128545	10.59	13.11	0.583598	8.25	7.6	0.560785	8.31	8.02	"Integrin-linked kinase-associated serine/threonine phosphatase 2C (AHRD V1 **** ILKAP_RAT); contains Interpro domain(s) IPR015655 Protein phosphatase 2C "	2.71443	2.1299	1.34836	1.34992
Solyc01g080480.2.1	2.39e-05	15.01	15.98	1.7e-05	17.37	17.79	0.0157932	13.19	4.26	0.000309	10.85	11.59	"Endonuclease/exonuclease/phosphatase family protein (AHRD V1 ***- D7L0T9_ARALY); contains Interpro domain(s) IPR005135 Endonuclease/exonuclease/phosphatase "	10.7602	11.8344	5.61427	6.99378
Solyc01g080490.2.1	1	1.37	0.72	1	2.87	0.78	0.000809	8.47	13.77	0.0929241	4.91	5.82	"Genomic DNA chromosome 5 P1 clone MCL19 (AHRD V1 ***- Q9FNL3_ARATH); contains Interpro domain(s) IPR007770 Protein of unknown function DUF679 "	-1.42931	1.13017	6.13097	2.91772
Solyc01g080500.2.1	0.664968	569.76	434.86	0.773978	323.73	462.52	0.145899	292.17	225.96	0.0276617	222.65	212.44	Unknown Protein (AHRD V1)	1.17855	-1.1213	-1.80897	-2.22062
Solyc01g080570.2.1	1.99e-07	1.17	3.8	0.000699	11.13	3.26	0.831161	33.85	38.36	0.379903	53.06	38.94	"Inosine-uridine preferring nucleoside hydrolase family protein (AHRD V1 *-** D7LYI5_ARALY); contains Interpro domain(s) IPR001910 Inosine/uridine-preferring nucleoside hydrolase "	-11.5561	-4.26246	1.09934	1.3591
Solyc01g080590.2.1	0.0151198	28.33	22.7	0.0467228	18.2	29.57	0.555587	13.32	16.21	0.767527	9.88	10.39	Unknown Protein (AHRD V1)	2.5227	2.29061	1.33487	-1.1155
Solyc01g080600.2.1	0.0144581	0.49	8.71	0.56671	24.16	31.13	0.686118	63.65	53.49	0.46706	78.18	70.9	"Histone H3 (AHRD V1 ***- D8L9K7_WHEAT); contains Interpro domain(s) IPR000164 Histone H3 "	-8.85509	-1.50979	1.31752	1.6256
Solyc01g080640.2.1	4.39e-05	33.25	43.45	0.00824	77.68	48.49	0.000272	50.75	34.29	0.000687	55.9	63.71	"Multidrug resistance protein ABC transporter family (AHRD V1 **-- B9GS96_POPTR); contains Interpro domain(s) IPR001140 ABC transporter, transmembrane region "	-4.10557	-2.58139	-4.02753	-2.95159
Solyc01g080680.2.1	0.0007	0.23	1.85	0.0242944	5.15	5.85	0.0112469	5.58	2.95	0.188365	20.51	5.22	"Glucose transporter 8 (AHRD V1 ***- Q2KKJ3_SOLIN); contains Interpro domain(s) IPR003663 Sugar/inositol transporter "	-26.0314	-5.50097	-7.45825	-2.63179
Solyc01g080750.2.1	0.110372	0.22	3.02	0.256578	13.55	12.56	0.000244	47.73	43.12	7.04e-06	60.22	52.59	"HEAT repeat family protein (AHRD V1 **-- B4FX70_MAIZE); contains Interpro domain(s) IPR016024 Armadillo-type fold "	-3.90998	1.87698	6.1203	7.35515
Solyc01g080770.2.1	1	3.36	4.06	1	2.65	3.86	0.0336656	8.73	13.09	0.00311	13.65	13.12	Receptor like kinase, RLK	1.14762	-1.01505	3.01949	3.59612
Solyc01g080790.2.1	2.7e-10	34.24	45.17	2.92e-07	20.19	71.87	0.23952	9.26	0.72	0.0136126	5.28	9.6	"PBSP domain-containing protein (AHRD V1 **-- C9S7G7_VERA1); contains Interpro domain(s) IPR007541 Plant Basic Secretory Protein "	28.2596	32.3179	3.37281	4.81621
Solyc01g080800.2.1	9.65e-12	34.06	36.39	4.1e-05	7.45	28.4	1	0.31	0.26	1	0.99	0.6	"PBSP domain-containing protein (AHRD V1 **-- C9S7G7_VERA1); contains Interpro domain(s) IPR007541 Plant Basic Secretory Protein "	59.1394	29.6363	-1.54811	1.40362
Solyc01g080890.2.1	0.0143756	108.29	137.34	0.00226	110.17	76.26	0.0144791	83.04	157.04	0.00312	140.42	84.86	Unknown Protein (AHRD V1)	-2.61853	-3.55941	-2.93685	-3.21774
Solyc01g080910.2.1	0.015437	10.63	9.34	8.35e-05	5.54	3.09	0.546117	8.59	31.96	0.125434	17.72	14.3	Unknown Protein (AHRD V1)	-2.39413	-5.63718	-1.31049	-1.69175
Solyc01g080920.2.1	1.43e-05	2.89	4.28	0.000289	6.12	4.05	6.98e-07	2.88	2.42	1.03e-06	4.1	3.73	"U-box domain-containing protein (AHRD V1 ***- A8IXJ0_BRACM); contains Interpro domain(s) IPR003613 U box domain "	-6.92117	-5.0833	-10.0782	-7.12307
Solyc01g081040.2.1	1	1.49	1.5	1	1.5	1.78	0.00855	6.1	7.95	0.0658722	4.84	4.72	"RING finger protein (AHRD V1 *-*- C6EUD3_SOYBN); contains Interpro domain(s) IPR018957 Zinc finger, C3HC4 RING-type "	1.53996	1.63195	6.23594	4.17167
Solyc01g081060.2.1	0.868767	142.94	101.28	0.778021	106.11	158.64	0.00668	47.89	46.6	0.000362	46.85	34.67	"Xyloglucan endotransglucosylase/hydrolase 14 (AHRD V1 **** C0IRH3_ACTDE); contains Interpro domain(s) IPR016455 Xyloglucan endotransglucosylase/hydrolase "	1.06024	1.11035	-2.68456	-3.20691
Solyc01g081080.1.1	2.63e-13	36.12	42.38	0.000156	7.5	9.36	1	0.03	0	0.500152	1.14	0.66	"Replication factor C subunit (AHRD V1 *-*- B8BYF4_THAPS); contains Interpro domain(s) IPR019483 DNA polymerase III, clamp-loader complex, subunit E, C-terminal "	305.608	65.6162	1.1035	7.62205
Solyc01g081190.2.1	0.0114822	74.85	82	0.0941668	64.22	55.27	1	32.89	33.34	1	34.15	33.71	"Calcium-binding EF hand family protein (AHRD V1 **** D7KZ13_ARALY); contains Interpro domain(s) IPR018248 EF hand "	2.60529	1.92294	1.00795	1.00529
Solyc01g081270.2.1	8.67e-08	94.98	81.67	2.99e-05	47.21	86.18	1	11.54	9.94	1	12.92	9.93	"Glutathione S-transferase (AHRD V1 ***- Q8H9E5_CUCMA); contains Interpro domain(s) IPR004046 Glutathione S-transferase, C-terminal "	8.37124	6.14349	-1.06466	-1.02968
Solyc01g081280.2.1	1.66e-07	32.17	35.4	0.00311	13.64	16.36	0.767297	1.54	3.35	0.757686	2.68	1.36	Unknown Protein (AHRD V1)	11.0332	4.77852	-1.2976	-1.59182
Solyc01g081310.2.1	1	22.83	25.49	0.77195	17.82	26.14	0.0207559	9.22	12.5	0.0146876	11.07	12.48	"Glutathione-S-transferase (AHRD V1 ***- B2BY02_9BRAS); contains Interpro domain(s) IPR004045 Glutathione S-transferase, N-terminal IPR017933 Glutathione S-transferase/chloride channel, C-terminal "	-1.01262	-1.14334	-2.44729	-2.3179
Solyc01g081440.2.1	0.0502688	21.49	32.86	0.596011	22.03	13.05	0.0137304	40.39	36.02	0.000482	45.06	57.82	"Unknown Protein (AHRD V1); contains Interpro domain(s) IPR010410 Protein of unknown function DUF1005 "	2.07068	1.30147	2.67442	3.50451
Solyc01g081540.2.1	0.0152834	12.89	34.58	0.0148531	31.94	16.45	0.391799	44.15	51.87	0.119458	38.83	42.66	"Myosin XI-F (AHRD V1 ***- B0CN60_NICBE); contains Interpro domain(s) IPR001609 Myosin head, motor region "	-2.55408	-2.56392	-1.36839	-1.65334
Solyc01g081600.2.1	0.0109705	77.82	42.75	0.000767	106.47	67.74	1.29e-05	159.53	133.78	1.08e-08	220.34	196.78	"Non-specific lipid-transfer protein (AHRD V1 ***- Q6E0V1_NICGL); contains Interpro domain(s) IPR013770 Plant lipid transfer protein and hydrophobic protein, helical "	2.93141	4.03315	6.43824	8.88912
Solyc01g081610.2.1	1.42e-11	165.37	104.98	4.36e-05	30.8	49.24	0.857939	7.5	7.58	0.849799	8.85	6.16	"Beta-hexosaminidase 1 (AHRD V1 **** D3TI69_SOLLC); contains Interpro domain(s) IPR015883 Glycoside hydrolase, family 20, catalytic core "	22.2797	6.37694	1.14818	1.11351
Solyc01g081620.2.1	2.88e-06	16.89	15.48	1.08e-07	13.18	6.92	1.32e-07	13.66	6.46	4.6e-06	23.69	18.13	"Vacuolar sorting protein (AHRD V1 *--- C6HJD3_AJECH); contains Interpro domain(s) IPR009291 Protein of unknown function DUF946, plant "	-5.96181	-9.91512	-10.43	-5.22008
Solyc01g081630.2.1	2.83e-06	38.66	46.38	0.0957218	12.17	17.13	0.00214	0.41	0.45	0.0215765	2.73	1.16	"Auxin-regulated protein (AHRD V1 *-*- Q945F5_SOLLC); contains Interpro domain(s) IPR010369 Protein of unknown function DUF966 "	6.63657	2.24051	-12.4983	-3.4551
Solyc01g086640.2.1	0.00176	81.23	79.68	0.00263	74.62	95.68	0.379927	63.3	21.93	1	27.61	31.19	"Os03g0169000 protein (Fragment) (AHRD V1 ***- Q0DUS7_ORYSJ); contains Interpro domain(s) IPR004348 Protein of unknown function DUF246, plant "	3.0028	3.08442	1.46362	-1.02261
Solyc01g086650.2.1	6.55e-07	7.25	17.53	0.000665	32.49	19.7	0.0498616	21.39	64.82	0.48462	76.66	85.55	"Siroheme synthase (AHRD V1 ***- A3LD64_PSEAE); contains Interpro domain(s) IPR006366 Uroporphyrin-III C-methyltransferase, C-terminal "	-7.24914	-3.55117	-2.29257	-1.2437
Solyc01g086660.2.1	0.00105	26.92	19.36	0.0122296	34.27	29.53	2.25e-06	14.49	8.54	5.99e-05	19.79	23.59	Unknown Protein (AHRD V1)	-3.31827	-2.50452	-7.27696	-4.00062
Solyc01g086730.2.1	0.0166874	9.6	7.66	0.000361	5.01	4.77	0.00156	7.91	6.36	3.59e-06	4.7	3.22	"DUF803 domain membrane protein (AHRD V1 **-- Q4WRL6_ASPFU); contains Interpro domain(s) IPR008521 Protein of unknown function DUF803 "	-2.56963	-4.63423	-3.39127	-6.20783
Solyc01g086800.2.1	0.0196121	3.43	4.28	0.437423	13.92	13.16	0.699184	36.82	27.23	0.28456	58.05	41.64	"Histone H3 (AHRD V1 **** Q53NE3_ORYSJ); contains Interpro domain(s) IPR000164 Histone H3 "	-5.74917	-1.72473	1.28944	1.93628
Solyc01g086810.2.1	6.66e-05	15.83	12.93	0.00966	5.97	12.38	0.346077	3.97	3.07	0.726896	2.92	2.87	Cc-nbs-lrr, resistance protein	8.66025	5.3959	1.99956	1.61645
Solyc01g086820.2.1	0.00367	1.46	12.18	0.718664	51.77	58.47	0.280277	141.38	154.43	0.152762	204.11	163.05	"Histone H3 (AHRD V1 ***- D8L9K7_WHEAT); contains Interpro domain(s) IPR000164 Histone H3 "	-10.0006	-1.26439	1.99279	2.40072
Solyc01g086850.2.1	0.174555	22.09	25.5	0.551365	34.17	29.7	0.0321698	22.15	13.05	0.0201703	19.55	18.69	"Ras-related protein Rab-25 (AHRD V1 ***- RAB25_HUMAN); contains Interpro domain(s) IPR015595 Rab11-related "	-1.634	-1.25765	-2.40213	-2.2815
Solyc01g086870.2.1	4.29e-12	30.78	32.47	5.59e-07	78.91	41.39	0.00222	88.29	176.81	0.000334	148.28	145.74	"BHLH transcription factor (AHRD V1 *-** B6TXR4_MAIZE); contains Interpro domain(s) IPR011598 Helix-loop-helix DNA-binding "	-12.6632	-6.92658	-3.33531	-3.07535
Solyc01g086920.2.1	0.385239	0.34	4.95	0.459157	11.18	10.1	0.00111	33.93	32.22	0.00211	20.23	48.15	LRR receptor-like serine/threonine-protein kinase, RLP	-2.25417	1.68782	4.8895	4.96584
Solyc01g086960.2.1	0.296917	596.51	410.86	0.457457	626.1	550.89	0.026907	385.13	288.17	0.00101	243.76	276.89	"Zinc finger A20 and AN1 domain-containing stress-associated protein 6 (AHRD V1 *-*- C1BNQ4_9MAXI); contains Interpro domain(s) IPR000058 Zinc finger, AN1-type "	-1.47673	-1.31782	-2.43417	-3.23946
Solyc01g087000.2.1	0.0196977	2.13	0.98	0.0123862	1.95	0	0.0583954	2.5	2.58	0.386364	6.2	4.72	Unknown Protein (AHRD V1)	-4.88363	-7.69505	-3.37112	-1.6629
Solyc01g087010.2.1	0.00804	0	0.68	0.0750951	0.6	2.97	0.0179593	0.64	1.31	0.0135062	1.16	0.73	"Acetyl xylan esterase A (AHRD V1 **-- Q8A041_BACTN); contains Interpro domain(s) IPR005181 Protein of unknown function DUF303, acetylesterase putative "	-13.1166	-3.30099	-6.07768	-6.42925
Solyc01g087020.2.1	0.000184	81.65	75.84	2.34e-06	114.28	141.47	0.20341	67.1	15.04	0.203279	32.24	39.79	Unknown Protein (AHRD V1)	3.8611	6.07669	1.85852	1.57168
Solyc01g087060.2.1	0.738888	1.73	3.43	1	4.47	0	0.148721	4.67	5.45	0.0129483	8.38	6.4	"Ring-h2 finger protein (AHRD V1 *-*- C1ECT6_9CHLO); contains Interpro domain(s) IPR018957 Zinc finger, C3HC4 RING-type "	1.64901	1.39761	2.90368	4.09413
Solyc01g087080.2.1	0.242071	0.91	1.36	1	4.21	4.54	0.001	15.41	18.86	0.000373	18.19	16.63	Unknown Protein (AHRD V1)	-2.82218	1.22927	4.41291	4.35421
Solyc01g087090.2.1	0.00443	14.4	17.45	0.00322	18.46	11.3	0.766554	25.72	94.85	0.267432	45.52	42.77	cDNA clone J023009A03 full insert sequence (AHRD V1 ***- B7EG04_ORYSJ)	-4.04067	-4.46647	-1.18294	-1.6462
Solyc01g087140.2.1	0.464534	2.12	2.63	0.0409753	7.86	3.98	0.0017	11.45	6.21	0.000753	9.07	9.07	Harpin-induced protein (AHRD V1 *-*- B6TDG9_MAIZE)	2.37106	5.5632	7.82708	7.81694
Solyc01g087150.2.1	0.000123	57.3	65.97	0.038509	24.24	36.7	0.0289026	3.85	2.53	0.0126392	2.31	3.57	"Mate efflux family protein (AHRD V1 **-- D7KHQ9_ARALY); contains Interpro domain(s) IPR002528 Multi antimicrobial extrusion protein MatE "	5.42625	2.61926	-3.73961	-4.14728
Solyc01g087180.2.1	1	0.46	0	0.00359	6.02	4.62	1	0.42	0.1	1	0	0	Unknown Protein (AHRD V1)	2.79608	41.703	2.95877	1
Solyc01g087240.2.1	0.0109501	40.41	27.62	0.0161278	38.57	29.61	0.123093	26.07	23.4	0.179165	23.22	21.82	"Nuclear transcription factor Y subunit A-1 (AHRD V1 *-** B6TAR1_MAIZE); contains Interpro domain(s) IPR001289 CCAAT-binding transcription factor, subunit B "	2.8345	2.72691	1.87685	1.66426
Solyc01g087250.2.1	2.67e-05	73.19	81.48	0.0570392	30.77	39.41	0.488277	13.16	13.09	0.606541	14.97	13.81	Carotenoid cleavage dioxygenase 1A	4.90569	2.16921	-1.2999	-1.21896
Solyc01g087280.1.1	0.0113843	0.45	0	0.0135107	0.06	0	0.00815	0.25	0.11	0.00788	0.11	0.21	"Polygalacturonase A (AHRD V1 **** Q9M6S2_ACTCH); contains Interpro domain(s) IPR000743 Glycoside hydrolase, family 28 "	-11.8116	-26.9729	-14.3919	-16.0021
Solyc01g087310.2.1	0.500926	5.87	5.51	0.640058	6.82	5.57	0.0825035	3.32	4.21	0.0362909	3.4	3.57	"Histone-lysine N-methyltransferase MLL (AHRD V1 *--- MLL1_HUMAN); contains Interpro domain(s) IPR011011 Zinc finger, FYVE/PHD-type "	-1.45601	-1.38418	-2.37627	-2.62753
Solyc01g087320.2.1	0.00153	15.91	16.41	0.128101	10.3	7.94	1	4.71	4.38	1	3.04	5.01	"tRNA-dihydrouridine synthase A (AHRD V1 ***- C9X2X8_NEIM8); contains Interpro domain(s) IPR001269 tRNA-dihydrouridine synthase "	4.31356	2.36967	1.13728	-1.01575
Solyc01g087330.2.1	0.290958	7.98	2.58	0.0133736	3.01	30.02	0.473963	6.25	2.9	0.42803	4.3	5.32	PHD finger family protein (AHRD V1 ***- D7LU24_ARALY)	2.39924	7.14505	1.90764	1.96032
Solyc01g087490.2.1	0.311355	77.38	63.21	0.372186	65.98	84.37	0.0343553	54.47	46.07	0.00323	45.01	42.29	"CONSTANS interacting protein 6 (Fragment) (AHRD V1 **-- Q2VY13_SOLLC); contains Interpro domain(s) IPR004082 Protein of unknown function DUF1423, plant "	-1.41784	-1.37081	-2.17633	-2.58004
Solyc01g087500.2.1	0.0186878	0.8	2.63	0.747564	11.12	7.91	0.0505244	35.99	38.33	0.0167481	44.89	42.23	"DNA topoisomerase 2 (AHRD V1 **** Q8GSC4_TOBAC); contains Interpro domain(s) IPR001241 DNA topoisomerase, type IIA, subunit B or N-terminal "	-6.50204	-1.27446	2.86067	3.25528
Solyc01g087540.2.1	0.828848	4.14	6.46	0.00784	31.33	8.93	1.46e-10	114.18	86.7	4.8e-12	81.06	134.4	"Os01g0611000 protein (Fragment) (AHRD V1 ***- Q0JLB5_ORYSJ); contains Interpro domain(s) IPR006946 Protein of unknown function DUF642 "	1.21757	4.38116	20.7614	21.7242
Solyc01g087580.2.1	0.0107656	120.21	97.4	0.0804796	48.76	113.52	0.50472	34.14	12.15	0.00827	8.74	8.64	Unknown Protein (AHRD V1)	3.49784	2.53769	-1.46307	-3.99098
Solyc01g087590.2.1	0.0518373	58.77	25.01	0.990053	122.05	87.32	0.0308386	55.74	6.23	5.15e-05	21.05	22.85	"Polyamine oxidase (AHRD V1 **** Q4H439_TOBAC); contains Interpro domain(s) IPR002937 Amine oxidase "	-2.38428	-1.00585	-3.53841	-5.18359
Solyc01g087600.2.1	0.619851	11.31	13.19	0.441639	16.61	11.36	0.10452	19.85	19.33	0.0478066	20.69	22.27	Protein E03H4.4 partially confirmed by transcript evidence (AHRD V1 *-*- O17744_CAEEL)	1.2656	1.39812	1.84593	1.9672
Solyc01g087620.2.1	0.113521	489.11	412.86	0.502019	481.11	771.16	0.0714974	456.31	411.89	0.0075	392.29	332.48	Unknown Protein (AHRD V1)	-1.73119	-1.28528	-1.97635	-2.44065
Solyc01g087680.2.1	0.00166	10.83	14.66	0.105799	8.13	5.97	1	2.6	3.89	1	3.36	2.24	"Uncharacterized membrane protein (AHRD V1 ***- A5GLU3_SYNPW); contains Interpro domain(s) IPR016804 Uncharacterised conserved protein UCP022348 "	4.94556	2.67568	1.19352	1.00821
Solyc01g087730.2.1	0.0245545	33.65	25.74	0.11109	19.17	31.08	0.207738	19.01	26.2	0.319517	21.36	19.22	"50S ribosomal protein L1 (AHRD V1 ***- A8YGI8_MICAE); contains Interpro domain(s) IPR005878 Ribosomal protein L1, bacterial-type "	2.35086	1.9294	1.62761	1.42264
Solyc01g087740.1.1	0.000269	0.18	1.17	0.0353609	7.84	0.57	0.299241	6.72	19.87	0.387306	12.36	19.65	"Subtilisin-like protease (AHRD V1 **-- O82777_SOLLC); contains Interpro domain(s) IPR015500 Peptidase S8, subtilisin-related "	-30.9908	-5.97483	-2.03395	-1.72122
Solyc01g087810.2.1	1	0.13	0	1	0.21	0	0.031444	2.99	3.31	0.125229	2.8	1.67	"Subtilisin-like protease (AHRD V1 **-- O82777_SOLLC); contains Interpro domain(s) IPR015500 Peptidase S8, subtilisin-related "	1.50295	1.79288	24.4685	17.4241
Solyc01g087820.2.1	0.141401	5.85	5.83	0.578473	4.12	2.77	7.19e-09	33.32	43.65	3.08e-06	18.11	18.65	"Subtilisin-like protease (AHRD V1 **-- O82777_SOLLC); contains Interpro domain(s) IPR015500 Peptidase S8, subtilisin-related IPR000209 Peptidase S8 and S53, subtilisin, kexin, sedolisin "	2.91106	1.68856	17.2322	8.052
Solyc01g087840.2.1	1	0.85	0.75	1	0.66	0.25	0.00212	4.26	10.33	0.0393201	4.26	3.85	"Subtilisin-like protease (AHRD V1 **-- O82006_SOLLC); contains Interpro domain(s) IPR015500 Peptidase S8, subtilisin-related "	1.21016	-1.34434	8.92159	4.9159
Solyc01g087850.2.1	0.0495634	6.32	10.09	0.295291	18.08	7.18	2.3e-05	121.46	152.76	0.00203	81.44	66.06	"Subtilisin-like protease (AHRD V1 **-- O82777_SOLLC); contains Interpro domain(s) IPR015500 Peptidase S8, subtilisin-related IPR000209 Peptidase S8 and S53, subtilisin, kexin, sedolisin "	-2.46329	-1.66005	6.13633	3.20771
Solyc01g087860.2.1	0.657422	2.19	4.71	0.165961	3.04	0.76	0.0232618	1.22	1.59	0.33357	4.36	2.3	Unknown Protein (AHRD V1)	-1.54685	-2.80863	-3.90939	-1.79031
Solyc01g087870.2.1	1.38e-05	5.81	9.3	0.000707	15.1	6.67	0.00109	14.47	10.74	0.00144	17.26	13.42	"Glucosamine--fructose-6-phosphate aminotransferase (AHRD V1 ***- A8IZE7_CHLRE); contains Interpro domain(s) IPR005855 Glucosamine-fructose-6-phosphate aminotransferase, isomerising "	-5.63167	-4.05935	-3.69692	-3.1391
Solyc01g087880.2.1	0.00374	10.59	17.08	0.100352	20.19	25.49	0.203052	25.58	30.51	0.112494	32.95	22.33	Unknown Protein (AHRD V1)	-3.00595	-1.87193	-1.62383	-1.69715
Solyc01g087970.2.1	0.00842	9.11	22.84	0.000971	15.84	7.85	0.00522	11.5	20.67	0.00981	19.82	20.96	"Serine carboxypeptidase 1 (AHRD V1 **** B6SW38_MAIZE); contains Interpro domain(s) IPR001563 Peptidase S10, serine carboxypeptidase "	-2.86524	-3.94937	-3.08764	-2.49844
Solyc01g087980.2.1	2.43e-06	289.25	252.96	0.00577	101.84	170.68	0.232335	39.44	12.36	0.0664655	29.8	15.14	Unknown Protein (AHRD V1)	6.51611	3.18138	-1.74538	-2.09108
Solyc01g088100.2.1	0.000579	85.42	93.68	0.0108893	80.53	61.5	0.21867	45.57	45.46	0.0828756	48.74	58.35	"Zinc finger CCCH domain-containing protein 22 (AHRD V1 ***- C3H22_ORYSJ); contains Interpro domain(s) IPR000571 Zinc finger, CCCH-type "	3.40697	2.61521	1.58626	1.81646
Solyc01g088110.1.1	2.71e-11	151.9	63.17	4.92e-08	33.4	102.81	0.063094	0.19	0	0.726896	1.73	1.81	Unknown Protein (AHRD V1)	45.3401	27.6774	-11.4326	-1.41506
Solyc01g088120.1.1	0.00292	4.17	6.22	1	0.95	0	1	0.12	0	1	0	0.15	Unknown Protein (AHRD V1)	41.3313	4.65017	1.44556	1.55749
Solyc01g088150.2.1	0.0213881	15.39	16.66	0.0750692	23.99	14.8	0.0562818	23.36	15.6	0.0348301	20.23	20.33	"Glycerol-3-phosphate dehydrogenase-like protein (AHRD V1 **** Q8S2G5_ORYSJ); contains Interpro domain(s) IPR006168 NAD-dependent glycerol-3-phosphate dehydrogenase "	-2.40307	-2.05875	-2.16002	-2.13728
Solyc01g088160.2.1	0.861805	8.95	2.37	0.323296	8.81	7.56	0.0454116	9.09	15.07	0.0143031	13.08	13.95	"Cytokinin oxidase/dehydrogenase (AHRD V1 **** C3VPM6_SOLTU); contains Interpro domain(s) IPR015345 Cytokinin dehydrogenase 1, FAD and cytokinin binding "	1.30192	1.79815	2.49313	2.72049
Solyc01g088240.2.1	0.005	14.55	15.39	0.112871	11.02	8.65	0.32013	8.34	7.17	0.31467	8.34	8.36	"F-box family protein (AHRD V1 ***- D7M7Q4_ARALY); contains Interpro domain(s) IPR001810 Cyclin-like F-box "	3.6212	2.31199	1.73335	1.81783
Solyc01g088390.2.1	0.698404	1.37	1.07	1	2.99	2.73	0.00715	8.56	10.94	0.00761	9.52	9.16	"Sister chromatid cohesion protein DCC1 (AHRD V1 ***- B5XCA8_SALSA); contains Interpro domain(s) IPR019128 Sister chromatid cohesion protein DCC1 "	-1.64601	1.30767	4.06948	3.7929
Solyc01g088460.2.1	0.0550547	3.16	6.9	0.701985	2.89	1.2	0.180501	3.87	3.59	0.0227171	6.27	6.04	Unknown Protein (AHRD V1)	4.13725	1.6988	2.85098	4.52339
Solyc01g088470.2.1	0.0124915	16.41	8.91	0.20492	6.39	9.71	0.150262	7.67	8.17	0.136784	8.6	8.13	"50S ribosomal protein L18 family (AHRD V1 ***- D7LAX4_ARALY); contains Interpro domain(s) IPR005484 Ribosomal protein L18/L5 "	3.67803	2.27164	2.1049	2.16094
Solyc01g088500.2.1	1	0.15	1.07	0.148353	2.28	4.1	0.0124879	6.43	3.81	0.0216724	3.78	6.09	Genomic DNA chromosome 5 TAC clone K6A12 (AHRD V1 ***- Q9FGR6_ARATH)	1.83833	8.05512	12.1328	11.4325
Solyc01g088530.2.1	0.00168	4.68	3.87	0.00151	3.14	4.74	0.00589	5.73	6.81	0.00745	7.03	7.4	Transposon protein (AHRD V1 ***- B6TXP6_MAIZE)	-3.88247	-4.33025	-2.92601	-2.6224
Solyc01g088560.2.1	1.69e-05	45.06	48.48	0.0122917	133.97	64.69	0.00601	112.41	74.08	0.00229	91.78	103.71	"Ras-related protein Rab-6A (AHRD V1 ***- B6STE7_MAIZE); contains Interpro domain(s) IPR015600 Rab6-related "	-6.07126	-2.97666	-3.32533	-3.26836
Solyc01g088600.2.1	0.418331	3.81	4.44	0.435828	4.79	3.16	0.0074	8.21	11.3	0.0123941	8.65	9.07	PDE320 (AHRD V1 ***- D7L613_ARALY)	1.99226	1.86755	4.23957	3.75092
Solyc01g088620.2.1	0.500448	0.59	1.44	0.0500137	1.25	4.7	0.00802	5.17	3.37	0.00395	4.16	5.55	Ferredoxin-like (AHRD V1 ***- Q6EP30_ORYSJ)	8.86507	23.8815	32.7847	36.6985
Solyc01g088660.2.1	0.0128528	21.91	27.11	0.0601708	41.19	14.59	0.622425	50.81	56.16	0.490036	82.64	81.79	"Os04g0585900 protein (Fragment) (AHRD V1 *-*- Q0JAP2_ORYSJ); contains Interpro domain(s) IPR007650 Protein of unknown function DUF581 "	-2.38507	-2.178	-1.1975	1.24814
Solyc01g088710.2.1	0.0125083	20.45	15.78	0.0718217	21.47	27.17	0.000423	13.37	11.01	0.000138	12.3	13.75	"Metacaspase (AHRD V1 ***- A8NU42_COPC7); contains Interpro domain(s) IPR011600 Peptidase C14, caspase catalytic "	-2.54162	-1.96103	-4.13206	-3.97903
Solyc01g088760.2.1	0.00747	13.36	9.34	0.0858672	6.9	8.83	0.457423	1.26	0.85	0.453625	1.52	1.1	Cytochrome P450	4.774	3.21481	-2.21287	-1.86173
Solyc01g088770.2.1	0.826707	15.03	33	0.159508	19.17	11.86	0.133603	15.49	16.69	0.042478	17	11.97	"Os04g0665000 protein (Fragment) (AHRD V1 ***- Q0J999_ORYSJ); contains Interpro domain(s) IPR010625 CHCH "	-1.0983	-1.73539	-1.7691	-2.02047
Solyc01g088780.2.1	0.631137	1.02	2.03	1	1.4	0	0.000689	8.01	7.9	0.000296	10.38	6.8	"Rho-related GTP-binding protein RhoC (AHRD V1 **-- RHOC_PONAB); contains Interpro domain(s) IPR003578 Ras small GTPase, Rho type "	2.26487	1.10711	10.1839	10.7011
Solyc01g088830.2.1	0.887683	11.81	6.81	0.890598	11.42	3.6	0.0624331	3.25	3.72	0.0361314	3.47	3.01	"Ankyrin repeat protein (AHRD V1 **** B1Q4U3_9ROSI); contains Interpro domain(s) IPR002110 Ankyrin "	1.14417	-1.12487	-2.50213	-2.7606
Solyc01g089880.2.1	0.000715	8.16	4.65	0.00127	5.04	7.05	0.500207	2.28	0.19	0.125229	2.57	1.6	"Unknown Protein (AHRD V1); contains Interpro domain(s) IPR004895 Prenylated rab acceptor PRA1 "	50.9949	47.3557	10.2023	16.3465
Solyc01g090150.1.1	1	0	0	0.0021	0	28.55	1	0	0	1	0	0	Unknown Protein (AHRD V1)	1	112.756	1	1
Solyc01g090180.2.1	0.00017	0.3	2.05	0.00714	2.73	3.58	0.870733	12.33	22.1	1	14.6	17.76	"Extradiol ring-cleavage dioxygenase class III protein subunit B (AHRD V1 ***- B8GF38_METPE); contains Interpro domain(s) IPR014436 Extradiol aromatic ring-opening dioxygenase, DODA type "	-10.9812	-4.47551	1.10826	1.01527
Solyc01g090210.2.1	0.0773337	9.03	9.09	0.00673	6.55	5.28	0.0027	6.52	5.93	0.00446	8.26	6.25	Genomic DNA chromosome 5 P1 clone MCA23 (AHRD V1 ***- Q9FIK5_ARATH)	-2.10692	-3.30555	-3.33394	-2.9568
Solyc01g090240.2.1	0.525234	3.62	2.74	0.18362	3.91	5.56	0.0152077	7.24	7.27	0.0077	7.36	8.68	"Protein kinase 5 (AHRD V1 ***- Q8W4K8_ARATH); contains Interpro domain(s) IPR002290 Serine/threonine protein kinase "	1.97435	2.81755	4.04293	4.34424
Solyc01g090270.2.1	0.10805	10.63	12.8	0.133712	13.3	10.29	0.00253	18.29	25.45	0.00274	17.97	22.04	"Bzip-like transcription factor-like (AHRD V1 *-*- Q7X997_ORYSJ); contains Interpro domain(s) IPR006867 Protein of unknown function DUF632 "	2.02239	1.97269	3.43458	3.0701
Solyc01g090300.2.1	1	1.49	4.83	0.0170151	12.89	8.24	1	6.31	0	1	4.96	2.13	"Ethylene responsive transcription factor 1b (AHRD V1 *-*- C0J9I8_9ROSA); contains Interpro domain(s) IPR001471 Pathogenesis-related transcriptional factor and ERF, DNA-binding "	1.3123	4.14341	1.20999	1.3174
Solyc01g090340.2.1	0.146572	1.33	4.42	0.0519695	4.64	3.99	0.000739	6.87	9.47	0.000423	5.54	13.01	"Ethylene responsive transcription factor 1b (AHRD V1 *-*- C0J9I8_9ROSA); contains Interpro domain(s) IPR001471 Pathogenesis-related transcriptional factor and ERF, DNA-binding "	5.77428	8.33561	14.7802	16.409
Solyc01g090430.2.1	0.205743	5.77	7.95	0.0387034	5.73	3.13	0.704018	10.5	10.81	0.236441	8.07	8.08	Cc-nbs-lrr, resistance protein	-1.70429	-2.69239	-1.20721	-1.63224
Solyc01g090440.2.1	0.703015	1.51	0.94	1	2.98	0.43	0.00772	8.33	11.24	0.027699	8.58	8.33	Unknown Protein (AHRD V1)	-1.68283	-1.27828	3.98522	3.35356
Solyc01g090610.2.1	5.86e-15	217.08	256.96	1.55e-09	98.97	135.59	0.284448	13.67	10.75	0.00507	18.68	30.61	"2-oxoglutarate-dependent dioxygenase (AHRD V1 ***- B9GL06_POPTR); contains Interpro domain(s) IPR005123 Oxoglutarate and iron-dependent oxygenase "	33.7323	16.2817	1.61634	3.1625
Solyc01g090630.2.1	1.21e-08	78.21	75.48	5.53e-06	39.51	91.14	0.584341	5.75	1.87	1	4.48	7.91	"2-oxoglutarate-dependent dioxygenase (AHRD V1 ***- B9GL06_POPTR); contains Interpro domain(s) IPR005123 Oxoglutarate and iron-dependent oxygenase "	14.4083	11.9221	-1.4807	1.05832
Solyc01g090660.2.1	1.89e-08	57.78	69.5	0.004	15.02	30.82	0.00129	0.2	0.16	0.0227171	1.51	0.54	Carotenoid cleavage dioxygenase 7	11.5384	4.07636	-18.8703	-5.30172
Solyc01g090670.2.1	1	5.55	9.1	1	9.53	5.91	0.150684	15.07	13.87	0.0312977	19.36	16.1	"Nuclear pore glycoprotein p62 (AHRD V1 *--- C0HBQ2_SALSA); contains Interpro domain(s) IPR007758 Nucleoporin, Nsp1-like, C-terminal "	1.0218	1.04514	1.83497	2.17979
Solyc01g090680.2.1	5.58e-08	29.4	27.71	0.00113	8.98	22.01	0.551222	3.19	4.27	0.774826	4.46	3.57	Genomic DNA chromosome 5 TAC clone K11J9 (AHRD V1 *-*- Q9FKH0_ARATH)	12.6073	6.68483	1.5571	1.62865
Solyc01g090760.2.1	0.00121	0.23	4.06	0.170391	33.1	20.75	0.00241	4.66	3.84	0.0339004	10.69	18.21	"GATA transcription factor 9 (AHRD V1 *-*- B6STZ1_MAIZE); contains Interpro domain(s) IPR016679 Transcription factor, GATA, plant "	-38.8693	-3.31289	-21.5496	-6.63436
Solyc01g090800.2.1	1	2.87	3.56	0.000389	19.15	21.6	0.118417	12.17	5.66	0.00416	13.29	15.67	"Cyclin-dependent kinase (AHRD V1 **** A6YTD1_CUCME); contains Interpro domain(s) IPR012389 Negative regulatory factor PREG "	-1.0698	5.56559	2.32253	3.6564
Solyc01g090810.2.1	1	0.62	0.25	1	0.63	0	0.00161	8.02	3.22	1.1e-12	27.04	28.06	"Expansin protein (AHRD V1 ***- Q14F61_WHEAT); contains Interpro domain(s) IPR007112 Expansin 45, endoglucanase-like "	4.3928	3.41263	42.91	203.607
Solyc01g090890.2.1	0.464244	3.89	4.02	0.110534	2.6	1.3	0.000719	0.52	0.07	0.00321	0.88	0.4	"Xenotropic and polytropic retrovirus receptor (AHRD V1 **-- B2GU54_XENTR); contains Interpro domain(s) IPR004331 SPX, N-terminal "	-1.65854	-3.35961	-17.2115	-9.85326
Solyc01g091160.2.1	0.603194	8.87	5.52	1	8.8	3.01	0.248228	9.63	10.57	0.0442976	15.49	11.33	"Agmatinase (AHRD V1 ***- Q1IPT1_ACIBL); contains Interpro domain(s) IPR006035 Ureohydrolase "	1.40624	1.11177	1.79504	2.31101
Solyc01g091190.2.1	0.021857	38.48	61.36	0.0309501	58.16	47.75	0.519419	86.2	102.85	0.133429	74.56	78.95	"3-phosphoshikimate 1-carboxyvinyltransferase (AHRD V1 ***- Q30CZ8_FAGSY); contains Interpro domain(s) IPR001986 3-phosphoshikimate 1-carboxyvinyltransferase, core "	-2.19846	-2.12667	-1.26461	-1.59763
Solyc01g091220.2.1	0.0388015	34.77	45.71	0.842952	83.43	82.17	1	96.53	91.79	0.897309	104.81	100.84	"40S ribosomal protein S13 (AHRD V1 ***- D7LRU2_ARALY); contains Interpro domain(s) IPR000589 Ribosomal protein S15 "	-2.16041	-1.08055	-1.00761	1.05268
Solyc01g091250.2.1	0.146336	6.26	2.33	2.4e-05	10.82	28.92	1	2	0.09	1	2.04	0.71	"Unknown Protein (AHRD V1); contains Interpro domain(s) IPR009902 Protein of unknown function DUF1442 "	3.3853	14.9199	-1.22091	1.024
Solyc01g091320.2.1	0.00176	3.18	8.53	0.22894	33.05	25.4	0.359836	45.41	29.55	0.990335	55.79	85.13	"Sterol 4-alpha-methyl-oxidase 2 (AHRD V1 **** D7KH21_ARALY); contains Interpro domain(s) IPR006694 Fatty acid hydroxylase "	-10.8598	-2.25977	-1.85904	-1.01741
Solyc01g091360.2.1	0.00274	0	0.31	0.0584376	2.02	0	0.660212	3.16	5.78	1	7.38	6.19	"Homology to unknown gene (AHRD V1 ***- Q00VP3_OSTTA); contains Interpro domain(s) IPR010865 Protein of unknown function DUF1499 "	-19.1085	-4.91637	-1.2912	1.13115
Solyc01g091370.2.1	0.238739	8.75	9.71	0.0154962	16.46	14.96	0.00113	24.47	19.41	0.000177	22.37	25.17	"AT-hook motif nuclear localized protein 1 (AHRD V1 ***- Q8VYJ2_ARATH); contains Interpro domain(s) IPR005175 Protein of unknown function DUF296 "	1.76352	2.89594	3.81153	4.01332
Solyc01g091470.2.1	0.069293	51.6	58.93	0.020929	38.62	52.16	0.000519	21.01	37.06	0.000182	35.59	31.4	"AT-hook DNA-binding protein (Fragment) (AHRD V1 *--* A1DR81_CATRO); contains Interpro domain(s) IPR014476 Predicted AT-hook DNA-binding "	-1.83916	-2.29843	-3.83141	-3.408
Solyc01g091520.2.1	0.0727847	9.16	6.26	0.206305	7.24	4.96	0.00644	9.79	14.31	0.00774	13.25	9.48	"Enoyl-CoA hydratase/isomerase family protein (AHRD V1 **** D7KSC7_ARALY); contains Interpro domain(s) IPR001753 Crotonase, core "	2.81192	2.15647	3.99221	3.67436
Solyc01g091530.2.1	0.881669	6.59	47.22	0.465059	52.42	37.37	0.0362498	116.87	80.57	0.0116739	98.48	136.66	"Fasciclin-like arabinogalactan protein 13 (AHRD V1 ***- A9XTL8_GOSHI); contains Interpro domain(s) IPR000782 FAS1 domain "	-1.13451	1.45749	3.03727	3.51685
Solyc01g091590.2.1	6.49e-05	301.49	311.2	0.012179	101.37	187.38	0.944311	62.17	17.82	0.494046	30.43	24.96	"SRC2 protein (AHRD V1 ***- A7XAJ8_9CONI); contains Interpro domain(s) IPR000008 C2 calcium-dependent membrane targeting "	8.76848	4.03309	1.05707	-1.41633
Solyc01g091630.2.1	0.00594	0.33	0.8	0.422351	4.15	3.7	0.056027	2.8	1.75	0.264638	3.99	3.58	"Homeobox-leucine zipper protein ATHB-9 (AHRD V1 *-*- ATBH9_ARATH); contains Interpro domain(s) IPR002913 Lipid-binding START "	-9.24606	-1.62323	-2.89877	-1.83409
Solyc01g091640.2.1	1	8	13.14	0.232397	18.53	16.78	0.0249333	29.56	26.46	0.0133331	27.31	32.15	"Dehydration responsive protein (AHRD V1 ***- C0JJG7_SOYBN); contains Interpro domain(s) IPR004159 Protein of unknown function DUF248, methyltransferase putative "	1.01043	1.63568	2.44402	2.5205
Solyc01g091700.2.1	0.0135279	1.76	1.68	0.122398	4.54	2.44	0.684582	5.5	11.45	0.715216	15.71	13.57	"F-box protein PP2-B1 (AHRD V1 ***- PP2B1_ARATH); contains Interpro domain(s) IPR001810 Cyclin-like F-box "	-5.82713	-3.07586	-1.37581	1.21182
Solyc01g091730.2.1	0.0439528	115.56	123.01	0.232986	107.82	83.67	0.303218	89.15	103.49	0.253784	95.37	101.41	"Peroxisomal membrane protein 11-5 (AHRD V1 ***- PX115_ORYSJ); contains Interpro domain(s) IPR008733 Peroxisomal biogenesis factor 11 "	1.963	1.52391	1.44736	1.44024
Solyc01g091760.2.1	3.38e-13	74.65	68.85	1.97e-07	22.6	38.95	0.25031	0.06	0	1	1.42	0.35	"Ethylene responsive transcription factor 2a (AHRD V1 *-*- C0J9I7_9ROSA); contains Interpro domain(s) IPR001471 Pathogenesis-related transcriptional factor and ERF, DNA-binding "	49.3365	20.6367	-9.70083	-1.59582
Solyc01g091770.2.1	0.000114	12.63	13.56	0.0153366	6.27	10.78	0.508625	2.66	3.47	0.227348	5.39	3.62	"Ring H2 finger protein (AHRD V1 *-*- D9ZHD8_HYPPE); contains Interpro domain(s) IPR018957 Zinc finger, C3HC4 RING-type "	7.63292	4.86744	1.69409	2.39161
Solyc01g091870.2.1	0.00109	8.76	9.19	0.0224129	4.38	9.49	0.500207	0.00851	0.1	0.500152	0	0.04	"Major facilitator superfamily domain-containing protein 8 (AHRD V1 *--- MFSD8_XENLA); contains Interpro domain(s) IPR004331 SPX, N-terminal "	8.87984	6.70917	-5.93458	-7.2529
Solyc01g091910.2.1	2.44e-06	7.52	9.93	0.0041	29.67	12.67	0.00125	24.33	13.87	0.000642	16.69	24.84	"Phospholipase D (AHRD V1 **** Q9XGT0_GOSHI); contains Interpro domain(s) IPR011402 Phospholipase D, plant "	-8.36418	-3.60378	-4.18719	-3.96197
Solyc01g091930.2.1	1	0.7	1.68	0.143808	2.58	3.51	0.000119	8.88	9.89	0.00644	5.89	6.31	"Subtilisin-like serine protease (AHRD V1 **-- Q8L7D2_ARATH); contains Interpro domain(s) IPR015500 Peptidase S8, subtilisin-related "	2.08245	4.89077	13.8992	8.88443
Solyc01g093980.2.1	3.01e-06	8.63	15.72	0.0124215	2.96	4.99	1	0.59	0.05	1	0.24	0.4	"Gibberellin 20-oxidase 4 (AHRD V1 ***- B2MWW5_SOLLC); contains Interpro domain(s) IPR005123 Oxoglutarate and iron-dependent oxygenase "	52.9146	17.3777	1.83438	1.79829
Solyc01g094040.2.1	0.0209607	25.74	22.02	0.405227	40.48	43.28	0.0755247	36.37	24.17	0.0130135	24.51	28.3	"Plastocyanin-like domain containing protein expressed (AHRD V1 **-- Q2QRP3_ORYSJ); contains Interpro domain(s) IPR003245 Plastocyanin-like "	-2.29406	-1.35611	-1.98413	-2.33972
Solyc01g094120.2.1	1.25e-05	16.36	12.86	0.0894633	5.27	4.37	1	0.47	0.22	1	0.83	0.29	Cytochrome P450	14.319	4.65654	-2.34592	-1.6562
Solyc01g094130.2.1	1.42e-16	163.78	166.3	3.1e-08	44.04	55.04	0.063094	0.45	0.13	0.754281	2.97	1.57	Cytochrome P450	58.3244	17.0371	-7.32582	-1.31534
Solyc01g094140.2.1	2.14e-11	114.77	120.2	5.89e-06	42.86	55.63	0.173651	2.62	1.52	0.521939	5.04	3.22	Cytochrome P450	21.5368	8.78265	-2.70337	-1.43169
Solyc01g094150.2.1	0.0146945	15.91	15.49	0.0843511	11.57	14.02	0.106927	11.59	14.58	0.142554	13.08	10.68	"26S protease regulatory subunit 6A (AHRD V1 *--- PRS6A_RAT); contains Interpro domain(s) IPR003959 ATPase, AAA-type, core "	2.69832	2.13869	2.05661	1.81727
Solyc01g094160.1.1	2.72e-14	0.4	3.64	4.98e-16	0.73	0	5.39e-08	4.46	14.88	2.12e-10	13.23	6.35	Unknown Protein (AHRD V1)	-49.8443	-222.563	-11.9348	-12.1083
Solyc01g094210.2.1	0.0164572	5.78	4.88	0.301296	0.42	5.19	1	0.21	0.75	1	0.27	0.38	"Carbonyl reductase 3 (AHRD V1 **** B6TRS7_MAIZE); contains Interpro domain(s) IPR002347 Glucose/ribitol dehydrogenase "	9.12828	4.7873	-1.06068	-1.44407
Solyc01g094240.2.1	9.23e-12	31.89	42.12	0.00776	9.7	3.66	0.219331	2.66	2.76	0.375381	2.29	2.26	"Short-chain dehydrogenase/reductase (AHRD V1 ***- B0KZQ5_CAPAN); contains Interpro domain(s) IPR002347 Glucose/ribitol dehydrogenase "	91.4403	16.2985	6.52233	5.4015
Solyc01g094370.2.1	0.000306	51.02	88.42	0.00253	109.73	69.66	0.0102529	114.18	111.82	0.00231	118.33	97.44	"Remorin 2 (AHRD V1 ***- Q9XEX9_SOLLC); contains Interpro domain(s) IPR005516 Remorin, C-terminal region "	-4.23998	-3.38592	-2.83744	-3.06219
Solyc01g094380.2.1	0.27212	0.26	1.45	0.047154	0.19	0	0.112582	0.51	0.19	0.389856	1.76	1.26	"Glycosyltransferase CAZy family GT90 (Fragment) (AHRD V1 **-- D8SQN9_SELML); contains Interpro domain(s) IPR008539 Protein of unknown function DUF821, CAP10-like "	-3.82603	-16.9966	-8.54825	-2.59016
Solyc01g094410.2.1	7.66e-06	171.66	136.35	0.000711	99.77	116.24	0.908747	49.62	19.22	0.677723	24.13	32.05	"Phosphoribosylanthranilate transferase (Fragment) (AHRD V1 *--- Q43085_PEA); contains Interpro domain(s) IPR013583 Phosphoribosyltransferase C-terminal, plant "	5.27244	3.57105	1.08013	-1.16896
Solyc01g094430.1.1	1.63e-25	296.1	288.39	1.89e-13	49.56	67.17	1	0.07	0.26	0.00788	5.91	2.4	"Ripening-related protein 3 (AHRD V1 **-- RIP3_ORYSJ); contains Interpro domain(s) IPR009009 Barwin-related endoglucanase "	2277.14	449.482	2.19949	31.5633
Solyc01g094440.1.1	1.46e-29	570.77	505.53	3.89e-18	110.07	155.53	1	0.03	0.13	0.000126	8.89	5.66	"Ripening-related protein 3 (AHRD V1 **-- RIP3_ORYSJ); contains Interpro domain(s) IPR009009 Barwin-related endoglucanase "	4201.09	1022.21	1.59659	54.4494
Solyc01g094450.1.1	5.41e-28	503.21	413.45	9.39e-18	102.9	123.92	1	0.12	0.19	0.000258	9.36	4.57	"Ripening-related protein 3 (AHRD V1 *--- RIP3_ORYSJ); contains Interpro domain(s) IPR009009 Barwin-related endoglucanase "	2856.41	692.339	1.695	41.0568
Solyc01g094460.2.1	1	1.1	0.85	1	1.27	0.46	0.00084	7.41	11.97	0.00751	6.86	6.81	"AT-hook motif nuclear localized protein 1 (AHRD V1 ***- O04696_PEA); contains Interpro domain(s) IPR005175 Protein of unknown function DUF296 "	1.05597	-1.07881	8.62238	5.96183
Solyc01g094490.2.1	0.0238314	16.68	17.39	0.0729918	9.47	23.51	0.870927	7.45	10	1	5.81	8.05	"NAC transcription factor (AHRD V1 *-*- B3VK71_TOBAC); contains Interpro domain(s) IPR003441 No apical meristem (NAM) protein "	2.52194	2.37848	1.19111	-1.0796
Solyc01g094520.2.1	0.0473757	3.88	4.86	0.0949904	5.08	4.08	0.579661	7.78	10.4	0.662422	10.28	8.97	"Kelch-like protein 14 (AHRD V1 ***- B6T7I5_MAIZE); contains Interpro domain(s) IPR015915 Kelch-type beta propeller "	-2.39004	-2.35563	-1.27485	-1.23697
Solyc01g094550.2.1	1.83e-08	16.03	15.35	0.000121	41.6	13.52	0.000123	32.88	36.37	1.55e-05	30.89	39.4	"Acyl-CoA thioesterase family protein (AHRD V1 ***- D7KP80_ARALY); contains Interpro domain(s) IPR003703 Acyl-CoA thioesterase "	-8.8757	-5.2902	-4.42902	-4.47346
Solyc01g094570.2.1	0.25807	7.87	7.82	0.0394168	10.99	15.28	0.679309	7.36	5.06	0.526677	6.74	7.39	"Calmodulin-binding heat-shock-like protein (AHRD V1 **-* Q9SMU2_ARATH); contains Interpro domain(s) IPR002921 Lipase, class 3 "	1.83032	2.9575	1.33394	1.47269
Solyc01g094610.2.1	0.637346	0.36	2.92	1	0.99	0.82	0.125542	3.08	3.81	0.0216724	5.44	3.75	"Rop guanine nucleotide exchange factor 2 (AHRD V1 **-* ROGF2_ARATH); contains Interpro domain(s) IPR005512 Rop nucleotide exchanger, PRONE "	3.17324	1.81149	5.94564	7.66953
Solyc01g094660.2.1	3.7e-05	114.4	116.38	0.00547	57.34	92.71	0.0267027	9.67	10.12	0.0392561	11.79	10.99	"Receptor-like protein kinase (AHRD V1 *-*- Q9FZP2_ARATH); contains Interpro domain(s) IPR002290 Serine/threonine protein kinase "	5.02194	3.17958	-2.51094	-2.24445
Solyc01g094690.2.1	1	16.11	29.42	0.17348	57.31	26.58	7.49e-06	175.04	153.28	1.5e-06	146.88	153.71	"Aquaporin (AHRD V1 ***- Q40266_MESCR); contains Interpro domain(s) IPR012269 Aquaporin "	1.00675	1.79683	6.67173	5.93105
Solyc01g094700.2.1	0.201194	6.69	7.15	0.107761	11.48	5.77	0.000549	15.75	14.64	0.000966	14.35	15.99	"Glycerol-3-phosphate acyltransferase 4 (AHRD V1 **** D7KQ54_ARALY); contains Interpro domain(s) IPR002123 Phospholipid/glycerol acyltransferase "	2.21649	2.6647	4.4165	4.28829
Solyc01g094720.2.1	0.24993	3.55	4.57	0.74477	3.69	1.96	0.00129	8.07	13.47	0.0077	7.16	8.66	"Vesicular glutamate transporter (AHRD V1 **-* B3A011_9PULM); contains Interpro domain(s) IPR016196 Major facilitator superfamily, general substrate transporter "	2.90746	1.99506	6.9441	4.99166
Solyc01g094790.2.1	0.00038	48.05	69.21	0.111848	25.35	33.14	0.872236	10.93	25.61	1	19.69	14.95	"Cysteine synthase (AHRD V1 ***- Q9FS29_SOLTU); contains Interpro domain(s) IPR005859 Cysteine synthase A "	3.77159	1.84283	1.08093	-1.0006
Solyc01g094810.2.1	3.49e-05	104.32	114.12	0.110192	28.99	73.53	0.508333	27.38	46.54	0.787216	36.95	26.41	"Ubiquitin-conjugating enzyme (AHRD V1 **** D2VN46_NAEGR); contains Interpro domain(s) IPR015581 Ubiquitin-conjugating enzyme "	4.28502	1.97301	1.32446	1.10565
Solyc01g094830.2.1	0.0311179	8.53	7.17	0.0384409	8.64	6.87	0.0241706	8.93	6.75	0.0195503	8.32	7.66	"Receptor-like protein kinase (AHRD V1 **** Q39203_ARATH); contains Interpro domain(s) IPR002528 Multi antimicrobial extrusion protein MatE "	3.98792	3.81819	3.64902	3.61617
Solyc01g094840.2.1	0.0231859	23.78	34.11	0.716207	9.69	20.7	0.270649	14.96	27.63	0.667967	20.4	13.69	"RING finger protein 13 (AHRD V1 *-*- RNF13_RAT); contains Interpro domain(s) IPR018957 Zinc finger, C3HC4 RING-type "	2.32424	1.19864	1.56765	1.22546
Solyc01g094950.2.1	0.765969	503.9	445.53	0.394355	420.32	385.56	0.0754247	294.43	296.29	0.0148583	265.43	264.24	Protein BPS1, chloroplastic (AHRD V1 **-- BPS1_ARATH)	-1.10887	-1.35412	-1.95808	-2.24502
Solyc01g094960.2.1	0.000679	26.28	32.13	0.00306	41.15	24.36	0.0207641	47.13	42.23	0.00402	41.96	42.58	"Mitogen-activated protein kinase 4 (AHRD V1 **** D7R517_SOLLC); contains Interpro domain(s) IPR008351 JNK MAP kinase "	-3.34789	-3.08846	-2.39108	-2.59913
Solyc01g095050.2.1	0.19137	346.94	357.45	0.525314	405.55	490.28	0.125727	308.79	369.77	0.0332174	340.17	277.5	"Negatively light-regulated protein (AHRD V1 ***- B4FAY8_MAIZE); contains Interpro domain(s) IPR012482 Lg106-like "	-1.54244	-1.24896	-1.75627	-1.98501
Solyc01g095060.2.1	0.235075	6.46	8.04	0.0395044	3.17	27.67	0.776484	2.81	2.24	0.3445	1.54	2.08	Unknown Protein (AHRD V1)	1.97392	4.07778	-1.53351	-2.15286
Solyc01g095080.2.1	0.00049	0.84	1.13	0.000219	1.49	0	0.118359	8.24	2.95	0.00102	2.68	2.2	"1-aminocyclopropane-1-carboxylate synthase (AHRD V1 **** O65209_NICGU); contains Interpro domain(s) IPR004839 Aminotransferase, class I and II IPR004838 Aminotransferases, class-I, pyridoxal-phosphate-binding site "	-9.49195	-12.4609	-2.01043	-4.59824
Solyc01g095100.2.1	0.0409521	65.99	36.94	0.00529	38.08	43.45	4.94e-05	25.31	21.91	3.96e-06	24.19	22.98	"WRKY transcription factor 23 (AHRD V1 ***- C9DI12_9ROSI); contains Interpro domain(s) IPR003657 DNA-binding WRKY "	-2.21234	-2.90902	-5.31771	-5.48092
Solyc01g095140.2.1	2.97e-09	210.17	123.32	0.00017	665.22	315.13	8.25e-06	436.86	231.17	3.27e-07	391.78	346.91	"Late embryogenesis abundant protein (Fragment) (AHRD V1 **-- B7TGG5_PINSY); contains Interpro domain(s) IPR013990 Water Stress and Hypersensitive response "	-14.5749	-5.22498	-8.02086	-7.5087
Solyc01g095150.2.1	0.561994	1484.65	934.48	0.94351	1694.41	1546.3	0.005	652.53	223.12	0.000162	409.68	457.29	"Late embryogenesis abundant protein (Fragment) (AHRD V1 **-- B7TGE2_PINSY); contains Interpro domain(s) IPR013990 Water Stress and Hypersensitive response "	-1.24891	1.02722	-3.78533	-3.95978
Solyc01g095170.2.1	6.53e-07	2.85	4.25	4.76e-05	3.02	7.83	7.4e-06	4.62	6.13	8.02e-06	7.87	5.6	"Harpin-induced protein (AHRD V1 ***- B6SP51_MAIZE); contains Interpro domain(s) IPR010847 Harpin-induced 1 "	-8.48819	-5.7715	-6.19633	-5.11263
Solyc01g095240.2.1	4.62e-05	48.54	49.13	0.00242	29.11	37.88	0.774451	8.23	5.91	0.881935	9.28	6.26	Unknown Protein (AHRD V1)	6.05124	4.03459	-1.22579	-1.14932
Solyc01g095250.1.1	2.48e-25	427.01	334.34	1.73e-15	88.79	93.7	1	0.25	0.97	0.00655	8.24	3.54	"Acidic chitinase (AHRD V1 ***- Q71HN4_FICAW); contains Interpro domain(s) IPR001223 Glycoside hydrolase, family 18, catalytic domain "	536.411	124.429	-1.03895	7.58772
Solyc01g095260.1.1	6.89e-32	788.15	706.66	1.31e-19	144	225.48	1	0.15	0	5.73e-05	14.57	4.58	"Acidic chitinase (AHRD V1 **-- Q71HN4_FICAW); contains Interpro domain(s) IPR001223 Glycoside hydrolase, family 18, catalytic domain "	5832.84	1423.38	1.54763	71.0752
Solyc01g095290.2.1	1	2.11	1.98	0.747743	3.08	2.25	0.0987185	5.75	4.46	0.0496185	6.82	6.92	"1 3-alpha-D-xylosyltransferase (AHRD V1 **-* Q9ZSJ2_ARATH); contains Interpro domain(s) IPR003388 Reticulon "	1.18162	1.47787	2.60904	3.39403
Solyc01g095310.1.1	2.27e-24	286.67	242.56	5.14e-14	54.72	70.8	1	0.27	0.32	0.0157252	5.27	2.23	"Acidic chitinase (AHRD V1 **-- Q71HN4_FICAW); contains Interpro domain(s) IPR001223 Glycoside hydrolase, family 18, catalytic domain "	2068.05	483.001	3.1912	28.5797
Solyc01g095320.2.1	0.842654	6.33	3.2	0.0198963	16.66	10.41	0.592367	2.62	1.75	1	4.69	2.53	"BCL-2-associated athanogene 6 (AHRD V1 *-*- D7LDX9_ARALY); contains Interpro domain(s) IPR003103 Apoptosis regulator Bcl-2 protein, BAG "	1.4342	3.85237	-1.61044	-1.02259
Solyc01g095360.2.1	0.0509569	2.43	5.38	0.394169	1.57	2.29	0.01213	4.88	5.75	0.0118502	5.43	5.02	"C2 domain-containing protein (AHRD V1 *-*- D7M4Y1_ARALY); contains Interpro domain(s) IPR018029 C2 membrane targeting protein "	7.11946	3.54689	8.88673	8.52718
Solyc01g095370.2.1	0.216777	7.63	12.2	0.432071	8.57	7.86	0.0377985	13.44	15.2	0.0146114	15.56	15.57	"F-box family protein (AHRD V1 ***- B9I8S9_POPTR); contains Interpro domain(s) IPR001810 Cyclin-like F-box "	1.84021	1.48879	2.42641	2.56035
Solyc01g095430.2.1	0.104772	9.16	11.95	0.317674	7.81	8.45	0.0385635	10.65	13.99	0.0701608	11.66	9.68	Threonine endopeptidase (AHRD V1 **-- B6TCN7_MAIZE)	2.32831	1.75092	2.48283	2.09425
Solyc01g095550.2.1	0.0555728	7.54	12.01	0.824874	3.46	5.66	0.0157609	0.07	0	0.0157252	0.27	0.17	"Receptor-interacting serine/threonine-protein kinase 1 (AHRD V1 *--* RIPK1_HUMAN); contains Interpro domain(s) IPR010632 Protein of unknown function DUF1221 "	2.57186	1.18645	-24.5636	-12.1097
Solyc01g095560.2.1	0.0499064	7.24	5.53	0.023369	2.85	16.88	1	2.01	1.86	1	2.85	1.73	Unknown Protein (AHRD V1)	3.6452	5.46588	1.06107	1.20908
Solyc01g095620.2.1	0.032747	67.54	37.51	0.10304	74.22	61.79	0.0301698	70.97	35.89	0.0150884	70.77	49.63	"UDP-glucosyltransferase (AHRD V1 **-* B8QI32_9MAGN); contains Interpro domain(s) IPR002213 UDP-glucuronosyl/UDP-glucosyltransferase "	-2.18064	-1.7621	-2.36137	-2.1741
Solyc01g095630.2.1	0.0190757	175.77	112.31	0.0243775	123.73	166.01	0.357229	142.35	58.25	0.55831	90.05	81.1	"WRKY transcription factor (AHRD V1 ***- D3YEX5_SOLLC); contains Interpro domain(s) IPR003657 DNA-binding WRKY "	2.3149	2.24188	1.46845	1.20959
Solyc01g095670.2.1	0.693892	2.54	1.86	1	2	0.41	0.0396492	4.5	6.32	0.0658722	4.83	4.74	"Rhodanese-related sulfurtransferase (AHRD V1 *--- A0NUG1_9RHOB); contains Interpro domain(s) IPR001763 Rhodanese-like "	2.23753	1.24013	4.88997	4.2269
Solyc01g095700.2.1	0.000528	32.93	29.91	4.7e-07	17.28	13.78	0.0370572	42.72	63.71	0.0152985	55.84	53.57	"Abscisic acid receptor PYL8 (AHRD V1 **-* PYL8_ARATH); contains Interpro domain(s) IPR019587 Polyketide cyclase/dehydrase "	-3.31039	-6.9078	-2.15433	-2.14909
Solyc01g095720.2.1	2.76e-08	79.27	110.34	0.0844176	21.52	18.31	0.773353	6.93	8.92	0.892519	12.51	10.45	"Lipase (AHRD V1 *-*- C1FIH0_9CHLO); contains Interpro domain(s) IPR002921 Lipase, class 3 "	10.2431	2.10358	-1.25671	1.11386
Solyc01g095750.2.1	0.0124669	12.24	16.38	0.0418835	27.02	6.54	0.000839	25.6	18.03	0.000114	23.81	22.85	"Long-chain-fatty-acid-CoA ligase (AHRD V1 **** B2WS80_ARAHA); contains Interpro domain(s) IPR000873 AMP-dependent synthetase and ligase "	2.96915	3.32889	4.14354	4.3076
Solyc01g095770.2.1	0.000159	7.87	13.85	0.169329	42.07	15.72	0.488175	59.51	19.8	0.244077	44.52	29.81	"Cyclic nucleotide gated channel (AHRD V1 ***- A9CRE4_MALDO); contains Interpro domain(s) IPR000595 Cyclic nucleotide-binding "	-4.55619	-1.78552	-1.35916	-1.50614
Solyc01g095810.2.1	0.628058	8.29	8.64	0.588306	2.31	5.58	0.00494	0.6	0.69	0.0789595	2.25	2.33	"Ring H2 finger protein (AHRD V1 *-*- D9ZHD8_HYPPE); contains Interpro domain(s) IPR001841 Zinc finger, RING-type "	1.42499	-1.52534	-8.43005	-2.77955
Solyc01g095820.2.1	0.841178	3.41	5.53	0.0128828	0.72	0	0.0071	0.42	1.27	0.0227171	0.44	1.6	"RING finger protein (AHRD V1 *-*- C6EUD3_SOYBN); contains Interpro domain(s) IPR001841 Zinc finger, RING-type "	-1.23829	-11.977	-6.32361	-5.51847
Solyc01g095970.2.1	0.000858	25.02	28.05	0.00752	39.79	27.83	0.0439455	52.11	38.2	0.0110924	41.44	44.41	"Dynamin 2 (AHRD V1 ***- Q4V8Z7_DANRE); contains Interpro domain(s) IPR001401 Dynamin, GTPase region "	-3.43512	-2.79136	-2.20671	-2.38919
Solyc01g096000.2.1	0.0396015	11.74	9.16	0.0740775	5.95	14.58	0.00225	19.56	12.95	0.000179	19.82	17.48	"Harpin-induced protein (AHRD V1 ***- B6SQ86_MAIZE); contains Interpro domain(s) IPR010847 Harpin-induced 1 "	2.76546	2.64613	3.91789	4.35972
Solyc01g096040.2.1	0.00832	12.45	16.25	1	46.26	37.05	0.0867048	85.72	85.09	0.0724134	64.81	109.63	"Aspartic proteinase nepenthesin I (AHRD V1 **-- A9ZMF9_NEPAL); contains Interpro domain(s) IPR001461 Peptidase A1 "	-2.82213	-1.00815	1.9187	1.91557
Solyc01g096050.2.1	0.0270853	20.5	13.37	0.0517077	19.11	19.61	0.0231694	21.63	12.74	0.00163	16.17	11.87	"Transcription factor (AHRD V1 *--* Q9M4A8_MAIZE); contains Interpro domain(s) IPR011598 Helix-loop-helix DNA-binding "	-2.39954	-2.18115	-2.5971	-3.28142
Solyc01g096080.2.1	1	3.49	1.89	0.582252	4.5	3.17	0.000529	11.17	18.54	0.00172	11.56	11.97	Unknown Protein (AHRD V1)	1.24496	1.69513	6.04472	4.67016
Solyc01g096100.2.1	0.0268008	59.9	43.88	0.125105	34.93	50.11	0.251353	17.15	69.26	1	23.85	25.54	AT2G46550 protein (Fragment) (AHRD V1 ***- B9DHY8_ARATH)	2.33335	1.84968	1.75073	-1.01792
Solyc01g096120.2.1	0.130372	34.82	30.67	0.454485	52.32	39.15	0.00303	18.46	18.04	0.00273	23.23	18.57	"Dof zinc finger protein 2 (AHRD V1 *-*- A5HWF1_HORVD); contains Interpro domain(s) IPR003851 Zinc finger, Dof-type "	-1.81182	-1.34796	-3.55712	-3.20053
Solyc01g096140.2.1	0.00278	17.44	29.96	0.172494	2.69	0.7	0.026368	0.49	0.46	0.0584777	0.88	0.91	"Aluminum-activated malate transporter (Fragment) (AHRD V1 *--- C6EP55_SECCE); contains Interpro domain(s) IPR006214 Uncharacterised protein family UPF0005 "	4.22881	-3.20162	-10.0228	-6.13245
Solyc01g096190.2.1	0.0975187	27	28.98	0.317809	40.4	31.46	0.00676	24.3	11.58	0.00223	18.56	19.59	"Calcium-transporting ATPase (AHRD V1 ***- A8NHF4_COPC7); contains Interpro domain(s) IPR005782 ATPase, P-type, calcium-transporting "	-1.79314	-1.44541	-3.03934	-2.95034
Solyc01g096200.2.1	0.000191	20.01	11.94	0.0894209	55.29	18.18	0.00119	26.55	13.74	4.34e-05	16.62	18.67	"Pentatricopeptide repeat-containing protein (AHRD V1 *-*- D7M1E8_ARALY); contains Interpro domain(s) IPR011989 Armadillo-like helical "	-4.57796	-2.10218	-3.99436	-4.69754
Solyc01g096220.2.1	0.0283196	9.41	14.17	0.0127759	23.76	8.42	2.66e-05	38.77	21.01	1.41e-06	30.36	32.92	"Ras-related protein Rab-25 (AHRD V1 ***- RAB25_BOVIN); contains Interpro domain(s) IPR015595 Rab11-related "	2.94314	3.85701	6.81956	7.01012
Solyc01g096230.2.1	0.421343	28.97	28.65	0.0807355	22.94	18.55	0.00293	12.56	13.59	0.00631	15.17	18.25	"ATPase AAA family protein expressed (AHRD V1 **-- Q8GZX0_ORYSJ); contains Interpro domain(s) IPR003959 ATPase, AAA-type, core "	-1.34194	-1.92451	-3.22213	-2.59378
Solyc01g096240.2.1	0.566681	3.43	3.83	0.586621	5.17	2.15	0.000934	13.99	13.06	0.000726	14.41	11.68	Homology to unknown gene (AHRD V1 ***- Q01FV7_OSTTA)	1.6721	1.63415	5.57038	5.22767
Solyc01g096250.2.1	0.373613	2.01	0.62	1	5.34	3.22	0.00247	14.32	18.12	0.0398793	11.07	10.83	Unknown Protein (AHRD V1)	-2.71729	1.08683	3.81068	2.51842
Solyc01g096280.1.1	0.115433	10.37	9.6	0.00251	3.25	5.28	6.93e-05	2.27	3.41	0.000321	5.08	4.28	Cytochrome P450	-1.89438	-4.49683	-7.05647	-4.47282
Solyc01g096300.2.1	0.167552	4.33	5.16	0.179407	5.08	4.04	0.0231467	7.83	7.96	0.0195503	8.77	7.36	Cysteine-type endopeptidase/ ubiquitin thiolesterase (AHRD V1 **-- B6TDL6_MAIZE)	2.77907	2.59358	4.20095	4.18076
Solyc01g096340.2.1	0.447236	29.44	22.38	0.943219	18.53	19.68	0.0374602	9.07	10.77	0.000621	6.06	6.87	"Auxin-induced SAUR-like protein (AHRD V1 ***- Q8S351_CAPAN); contains Interpro domain(s) IPR003676 Auxin responsive SAUR protein "	1.3211	-1.06164	-2.15595	-3.36878
Solyc01g096430.2.1	0.000149	34.28	33.44	0.0142747	54.67	57.54	0.0314164	55.13	72.43	0.00774	65.71	58.52	"Predicted NADPH-dependent FMN reductase (AHRD V1 ***- Q0W0S0_UNCMA); contains Interpro domain(s) IPR005025 NADPH-dependent FMN reductase "	-3.78544	-2.36172	-2.21057	-2.33167
Solyc01g096450.2.1	0.388689	6.76	56.04	0.962148	66.84	38.09	0.00959	172.23	157.33	0.00155	161.24	239.1	"Aspartic proteinase nepenthesin-1 (AHRD V1 **-- B6TDX6_MAIZE); contains Interpro domain(s) IPR001461 Peptidase A1 "	-1.61852	1.02212	3.04145	3.60452
Solyc01g096460.2.1	3.72e-08	16.13	15.72	2e-08	14.69	13.7	5.58e-05	21.71	36.14	1.79e-05	32.69	36.87	"U-box domain-containing protein 4 (AHRD V1 **-- PUB4_ARATH); contains Interpro domain(s) IPR011989 Armadillo-like helical "	-8.08764	-9.36401	-4.91326	-4.18439
Solyc01g096470.2.1	0.013336	16.3	11.66	0.0346024	9.95	15.9	0.167376	9.04	9.85	0.0411086	11.78	11.79	Transcription factor (AHRD V1 *--* D7LUT4_ARALY)	3.32228	2.97339	2.06007	2.50034
Solyc01g096510.2.1	1.36e-07	83.7	40.57	0.00228	11.46	40.06	0.00799	24.9	10.67	0.0269888	20.15	7.7	"Sigma factor binding protein 1 (AHRD V1 *-*- D1MWZ4_CITLA); contains Interpro domain(s) IPR008889 VQ "	14.0389	5.63387	3.66587	2.77677
Solyc01g096540.2.1	0.0115538	15.35	14.65	0.0656483	20.85	17.91	0.164721	23.2	26.27	0.263347	31.04	27.74	"AT5g06970/MOJ9_14 (AHRD V1 **-- Q8RX56_ARATH); contains Interpro domain(s) IPR008528 Protein of unknown function DUF810 "	-2.53695	-2.03415	-1.69233	-1.46542
Solyc01g096620.2.1	0.39797	11.46	10.2	0.0100693	5.78	3.84	1	10.17	23.56	0.763837	16.87	13.91	Unknown Protein (AHRD V1)	-1.4368	-3.30126	-1.02019	-1.14243
Solyc01g096640.2.1	0.308462	8.39	5.34	0.000514	1.86	0.71	0.800317	6.28	14.25	0.448561	8.53	9.44	Unknown Protein (AHRD V1)	-1.54188	-7.90595	-1.1396	-1.3321
Solyc01g096670.2.1	0.00264	26.9	38.29	0.00383	27.67	38.22	0.689284	73.57	101.1	0.0810975	54.85	64.83	Cytochrome P450	-2.84121	-2.8769	-1.16065	-1.73311
Solyc01g096680.2.1	0.638931	0.21	0.86	1	2	2.05	0.0869983	6.54	6.34	0.0496185	7.56	6.86	"Microtubule-associated protein MAP65-1a (AHRD V1 **** Q9FEV9_TOBAC); contains Interpro domain(s) IPR007145 MAP65/ASE1 "	-2.92165	1.07431	3.08419	3.34859
Solyc01g096690.1.1	3.32e-13	95	146.46	2.21e-05	23.08	35.71	0.0188713	0.09	0.04	0.550401	2.62	1.34	"Receptor-like kinase (AHRD V1 *-** C6ZRP5_SOYBN); contains Interpro domain(s) IPR002290 Serine/threonine protein kinase "	34.9008	8.36946	-18.6903	-1.81272
Solyc01g096730.2.1	0.00303	3.41	7.45	0.942493	19.96	17.33	0.00235	7.13	4.8	0.00194	6.65	6.55	"Major facilitator superfamily transporter (AHRD V1 **-- A8NUY3_COPC7); contains Interpro domain(s) IPR016196 Major facilitator superfamily, general substrate transporter "	-3.48894	-1.06305	-3.45825	-3.22179
Solyc01g096790.2.1	0.744981	19.11	14.02	0.052196	9.51	8.48	0.0165185	5.99	10.87	0.0127039	9.73	7.84	"B3 domain-containing protein REM20 (AHRD V1 ***- REM20_ARATH); contains Interpro domain(s) IPR003340 Transcriptional factor B3 "	-1.14973	-2.17905	-2.46608	-2.42876
Solyc01g096800.2.1	0.0417671	9.31	11.72	0.174332	18.45	8.51	0.62882	21.05	19.34	0.77586	24.6	20.32	"SWI4 1 Peter Pan-like protein suppressor (AHRD V1 **-- D0MSA0_PHYIN); contains Interpro domain(s) IPR007109 Brix domain "	-2.10111	-1.70058	-1.20123	-1.11255
Solyc01g096810.2.1	1	151.28	133.05	0.25903	95.61	102.58	0.0474186	70.43	79.77	0.00249	63.1	56.23	"Ethylene insensitive 3 class transcription factor (AHRD V1 **** D5L146_MALDO); contains Interpro domain(s) IPR006957 Ethylene insensitive 3 "	1.00116	-1.48193	-2.07773	-2.68767
Solyc01g096820.2.1	0.0216993	83.67	71.76	0.2074	42.44	74.25	2.93e-07	5.32	1.85	2.5e-06	6.34	6.2	"Calcium-dependent protein kinase 1 (AHRD V1 ***- Q3YAS9_PETIN); contains Interpro domain(s) IPR002290 Serine/threonine protein kinase "	2.24989	1.64089	-10.1904	-6.09638
Solyc01g096930.2.1	0.151224	30.1	29.53	0.237641	37.88	28.41	0.0249883	27.79	16.26	0.00262	20.1	19.01	"Phospholipid-transporting ATPase (AHRD V1 **** B6JZB6_SCHJY); contains Interpro domain(s) IPR006539 ATPase, P-type, phospholipid-translocating, flippase "	-1.68456	-1.57003	-2.48632	-2.88647
Solyc01g096940.2.1	1	1.08	0.29	1	1.74	0.76	0.125542	3.1	3.24	0.0393201	2.92	6.15	Receptor like kinase, RLK	1.14628	1.89185	4.29565	5.92899
Solyc01g097040.2.1	0.306094	27.18	30.07	0.0520537	18.58	21.38	0.119942	19.1	29.66	0.00874	19.09	17.6	"IFA-binding protein-like (AHRD V1 *-*- Q5ZC01_ORYSJ); contains Interpro domain(s) IPR007656 Protein of unknown function DUF593 "	-1.43131	-2.10747	-1.84172	-2.50522
Solyc01g097060.2.1	0.0180875	0	0	0.0109481	0.24	0	0.0394117	0.3	1.15	0.109911	1.52	0.95	Unknown Protein (AHRD V1)	-30.9656	-16.443	-5.06725	-3.26562
Solyc01g097120.2.1	0.00132	36.06	49.02	0.000201	42.22	20.1	0.109896	61.93	95.57	0.0508739	87.43	69.48	"Os02g0200800 protein (Fragment) (AHRD V1 *-*- Q0E303_ORYSJ); contains Interpro domain(s) IPR009675 Targeting for Xklp2 "	-3.08186	-4.34628	-1.82278	-1.87857
Solyc01g097150.2.1	0.0458062	13.09	5.24	0.208236	6.33	6.01	0.165411	5.77	6.77	0.14584	7.02	5.51	Unknown Protein (AHRD V1)	3.5939	2.34313	2.25542	2.19898
Solyc01g097200.1.1	1	6.22	4.64	0.205496	3.16	1.84	0.275441	1.58	5.08	0.0355635	1.53	1.61	"Ankyrin repeat protein-like (AHRD V1 ***- Q6K268_ORYSJ); contains Interpro domain(s) IPR002110 Ankyrin "	-1.12773	-2.46836	-1.98143	-4.12179
Solyc01g097210.2.1	0.932312	14.18	19.9	0.010075	7.49	5.31	0.0309087	6	11.33	0.000235	6.64	3.67	"Ankyrin-like protein (AHRD V1 ***- Q8H9C2_SOLTU); contains Interpro domain(s) IPR011990 Tetratricopeptide-like helical "	-1.06542	-2.88302	-2.27117	-3.87893
Solyc01g097240.2.1	0.0149173	6.41	2.03	0.0204968	4.15	3.54	0.500207	1.47	1.17	0.0313931	3.13	2.96	"Pathogenesis-related protein 4B (Fragment) (AHRD V1 **-- Q6LBM4_TOBAC); contains Interpro domain(s) IPR018226 Barwin, conserved site IPR001153 Barwin "	24.5311	21.7905	7.70137	16.5443
Solyc01g097260.2.1	0.257385	1.82	3.89	0.625535	0.83	7.27	0.0921934	1.39	3.21	0.013123	1.52	0.97	Unknown Protein (AHRD V1)	-2.01259	-1.47241	-2.6878	-4.86927
Solyc01g097270.2.1	0.00611	5.86	8.66	0.0506761	14.15	14.97	0.698538	80.17	85.65	0.703843	52.71	48.64	"Chitinase (Fragment) (AHRD V1 *--- Q38777_ALLSA); contains Interpro domain(s) IPR000726 Glycoside hydrolase, family 19, catalytic IPR001153 Barwin "	-7.93476	-4.09391	1.29995	-1.2933
Solyc01g097340.2.1	0.844804	5.77	16.99	0.441895	25.03	13.54	0.132944	35.32	19.76	0.0343108	28.84	35.58	"NAD-dependent epimerase/dehydratase family protein-like protein (AHRD V1 ***- Q2XPW6_SOLTU); contains Interpro domain(s) IPR016040 NAD(P)-binding domain "	-1.16768	1.40933	1.91034	2.16364
Solyc01g097370.1.1	0.000477	9.25	4.84	0.135491	2.1	2.29	1	0	0	1	0.29	0.23	"Ammonium transporter (AHRD V1 ***- B9I5F0_POPTR); contains Interpro domain(s) IPR001905 Ammonium transporter "	39.9264	12.6414	-1.42278	2.03865
Solyc01g097380.1.1	0.00258	0.9	0.15	0.0261749	2.77	0	0.00108	1.17	0.43	0.0242802	4.17	0.5	"Aldo/keto reductase family protein (AHRD V1 ***- D7KWQ9_ARALY); contains Interpro domain(s) IPR020471 Aldo/keto reductase subgroup "	-12.4385	-5.55202	-9.5607	-3.73224
Solyc01g097390.2.1	0.0344316	1.58	1.9	0.338238	4.29	3.41	0.858262	7.49	5.86	1	8.37	6.11	"Aldo/keto reductase family protein (AHRD V1 ***- D7KWQ9_ARALY); contains Interpro domain(s) IPR001395 Aldo/keto reductase "	-3.68957	-1.78688	-1.10851	-1.054
Solyc01g097410.2.1	0.0075	0.55	3.01	0.0328412	4.51	0	0.168227	7.41	1.93	0.116246	5.48	4.78	Unknown Protein (AHRD V1)	-4.9915	-4.14303	-2.15262	-2.01953
Solyc01g097430.2.1	1.87e-17	81.14	92.36	1.46e-06	10.85	18.71	1	0.02	0.03	0.125229	2.58	1.49	"ABC transporter G family member 2 (AHRD V1 *-*- AB2G_ARATH); contains Interpro domain(s) IPR013525 ABC-2 type transporter "	674.499	114.616	1.1778	15.9546
Solyc01g097470.2.1	0.000144	15.96	9.15	1.71e-05	34.42	10.15	0.182114	5.01	2.8	0.000784	10.95	6.91	Neurogenic locus notch protein-like (AHRD V1 ***- B6SSE6_MAIZE)	12.8089	21.5822	3.73571	8.16348
Solyc01g097480.1.1	3.72e-10	18.86	27.67	0.00326	7.99	3.17	1	0.14	0.18	1	0.17	0.17	Unknown Protein (AHRD V1)	181.08	43.5388	2.1604	2.24385
Solyc01g097490.1.1	3.09e-06	13.11	14.74	0.0524672	4.64	3.38	1	0.07	0.19	1	0.26	0.28	IQ calmodulin-binding motif family protein (AHRD V1 ***- B6SSD5_MAIZE)	26.8548	7.70006	-2.14487	-1.42729
Solyc01g097510.2.1	0.482487	52.39	67.21	0.289317	28.19	36.54	2.04e-05	7.94	9.22	2.88e-06	11.32	7.2	"Annexin 3 (AHRD V1 ***- A9X4R3_BRAJU); contains Interpro domain(s) IPR015472 Annexin like protein IPR001464 Annexin "	1.26919	-1.48987	-5.91223	-5.64897
Solyc01g097520.2.1	0.217049	159.9	239.89	0.00283	122.3	94.14	6.38e-06	66.46	37.33	5.23e-07	72.21	50.9	"Annexin 11 (AHRD V1 ***- D6QX28_SOYBN); contains Interpro domain(s) IPR009118 Annexin, type plant "	-1.51334	-2.86972	-6.2956	-5.50121
Solyc01g097540.2.1	0.586117	13.65	20.43	0.449657	15.84	16.28	0.00577	8.33	7.67	0.0140936	12.39	7.44	"Annexin 3 (AHRD V1 ***- A9X4R3_BRAJU); contains Interpro domain(s) IPR015472 Annexin like protein IPR001464 Annexin "	-1.24646	-1.35741	-2.86656	-2.39092
Solyc01g097550.2.1	0.016729	0.14	20.55	0.00451	15.99	9.28	0.00103	11.82	10.18	0.00774	22.47	9.75	"Annexin 11 (AHRD V1 ***- D6QX28_SOYBN); contains Interpro domain(s) IPR015472 Annexin like protein IPR001464 Annexin "	-4.30296	-3.54845	-4.2955	-3.0477
Solyc01g097650.2.1	0.877797	8.84	5.6	0.350943	14.14	13.45	0.0446973	21.13	18.98	0.15715	18.23	13.09	"Serine incorporator 1 (AHRD V1 **-- B5X3W1_SALSA); contains Interpro domain(s) IPR005016 TMS membrane protein/tumour differentially expressed protein "	-1.1504	1.59228	2.17968	1.65795
Solyc01g097810.2.1	7.64e-05	99.53	107.3	0.0841503	42.11	58.66	0.137121	15.83	16.08	0.137475	15.67	18.03	Zeta-carotene desaturase	4.09976	1.94617	-1.71653	-1.66974
Solyc01g097830.2.1	0.174258	8.24	6.66	0.0199167	12.34	11.92	0.00027	21.5	15.85	5.65e-05	16.42	25.91	"AT5G28150-like protein (Fragment) (AHRD V1 *-*- D6PS19_9BRAS); contains Interpro domain(s) IPR008586 Protein of unknown function DUF868, plant "	2.19862	3.445	4.99527	5.51118
Solyc01g097880.2.1	0.0192672	87.36	92.36	0.0282324	111.63	74.45	0.179891	134.62	130.57	0.0310139	115.66	109.39	"Deaminase (AHRD V1 *-*- D6B5U0_9ACTO); contains Interpro domain(s) IPR016193 Cytidine deaminase-like "	-2.19812	-2.1999	-1.6306	-1.97709
Solyc01g097890.2.1	0.114563	10.78	13.88	0.00975	7.84	7.66	0.250008	12.52	19.23	0.166729	15.88	15.25	"Os03g0370250 protein (Fragment) (AHRD V1 *--- C7J0C0_ORYSJ); contains Interpro domain(s) IPR007592 Protein of unknown function DUF573 "	-1.78168	-2.90061	-1.51717	-1.58797
Solyc01g097900.1.1	0.00296	5.67	4.33	1	0.43	0	1	0	0	1	0	0	Unknown Protein (AHRD V1)	39.8927	2.6528	1	1
Solyc01g097930.2.1	0.000255	4.82	10.36	0.0240184	2.2	4.95	0.500207	0.35	1.58	0.500152	1.61	0.86	"Cysteine synthase (AHRD V1 ***- Q9FSF5_TOBAC); contains Interpro domain(s) IPR005859 Cysteine synthase A "	26.6416	12.5943	3.55333	4.33849
Solyc01g097950.2.1	0.00117	8.11	6.72	0.03987	1.79	8.37	1	0.35	0.4	1	0.76	0.97	"Cysteine synthase (AHRD V1 ***- Q9FSF5_TOBAC); contains Interpro domain(s) IPR005859 Cysteine synthase A "	10.8739	7.33265	-1.47989	1.29789
Solyc01g097970.2.1	0.215048	1.14	3.55	0.168056	8.95	16.37	0.0245298	20.1	15.46	0.0039	19.91	21.28	"Deoxyuridine 5&apos-triphosphate nucleotidohydrolase (AHRD V1 ***- C1E7B9_9CHLO); contains Interpro domain(s) IPR008181 DeoxyUTP pyrophosphatase subfamily 1 "	-2.35824	2.14802	2.81495	3.15565
Solyc01g098120.2.1	0.0417871	8.64	4.61	0.19752	5.84	3.09	1	3.06	1.14	1	2.69	2.96	Unknown Protein (AHRD V1)	3.75514	2.46021	1.13706	1.46684
Solyc01g098130.2.1	0.0190626	13.78	6.49	0.149322	5.2	8.08	1	3.39	3.35	0.302874	6.32	4.56	Unknown Protein (AHRD V1)	4.11588	2.6195	1.27965	1.98102
Solyc01g098200.2.1	0.0257947	15.54	17.96	0.105119	12.36	17.01	0.0659047	13.85	18.12	0.186538	13.39	12.46	"Vesicle-associated membrane protein-associated protein A (AHRD V1 **-- B6UGD8_MAIZE); contains Interpro domain(s) IPR016763 Vesicle-associated membrane protein "	2.44975	2.09561	2.13833	1.6827
Solyc01g098340.2.1	0.0293384	7.64	9.69	0.0725278	7.88	7.82	0.308028	5.09	5.31	0.424954	5.38	4.88	"DNAJ heat shock N-terminal domain-containing protein (Fragment) (AHRD V1 *-*- D7L312_ARALY); contains Interpro domain(s) IPR015609 Molecular chaperone, heat shock protein, Hsp40, DnaJ "	3.35238	2.95452	1.8644	1.79118
Solyc01g098400.2.1	0.2715	9.03	12.16	0.326087	16.51	4.42	0.0400967	24.68	62.18	0.0432536	39.29	36.27	"Histidine phosphotransfer protein (AHRD V1 **** B9I823_POPTR); contains Interpro domain(s) IPR008207 Signal transduction histidine kinase, phosphotransfer (Hpt) region "	-1.51837	-1.59483	2.4333	2.07227
Solyc01g098440.1.1	0.000218	17.35	11.77	0.317047	6.17	3.12	1	1.15	2.85	0.754281	2.7	3.33	"Serine/threonine protein kinase-like (AHRD V1 **** Q9FGC3_ARATH); contains Interpro domain(s) IPR002290 Serine/threonine protein kinase "	6.74905	2.11624	-1.1154	1.28427
Solyc01g098500.2.1	0.0198926	47.74	51.87	0.0608133	45.33	45.21	0.184217	48.62	30.95	0.0506286	38.73	58.98	"Glucose transporter 8 (AHRD V1 ***- Q2KKJ3_SOLIN); contains Interpro domain(s) IPR003663 Sugar/inositol transporter "	2.35832	2.079	1.72836	2.06591
Solyc01g098510.2.1	0.00162	2.15	1.12	0.0556845	3.36	4.9	0.0095	2.85	4.06	0.0238173	4.47	4.06	Unknown Protein (AHRD V1)	-6.32507	-2.70202	-3.40258	-2.84786
Solyc01g098520.2.1	0.000504	1.05	0.48	0.624774	4.56	10.49	0.0813863	5.72	3.01	0.777742	8.53	9.85	"Unknown Protein (AHRD V1); contains Interpro domain(s) IPR002099 DNA mismatch repair protein "	-10.9909	-1.32116	-2.38393	-1.18094
Solyc01g098530.2.1	0.000981	5.72	9.17	0.013986	13.72	0	0.00106	8.58	8.2	0.000649	8.13	10.25	"CTP synthase like protein (AHRD V1 ***- O65445_ARATH); contains Interpro domain(s) IPR000991 Glutamine amidotransferase class-I, C-terminal "	-3.50209	-3.96123	-3.39535	-3.18624
Solyc01g098580.2.1	0.00224	13.13	12.04	0.311766	26.28	29.09	0.0120092	19.07	12.16	0.00699	18.14	15.93	"Phosphoglycerate mutase family protein (AHRD V1 ***- C1DZH2_9CHLO); contains Interpro domain(s) IPR013078 Phosphoglycerate mutase "	-3.11349	-1.46928	-2.74876	-2.59976
Solyc01g098590.2.1	0.857938	8.48	3.95	0.226978	9	10.91	0.0240483	33.37	5.96	0.017639	20.58	10.11	"Phosphoglycerate mutase family protein (AHRD V1 ***- C1DZH2_9CHLO); contains Interpro domain(s) IPR013078 Phosphoglycerate mutase "	1.27725	1.96094	3.65085	2.7555
Solyc01g098600.2.1	0.0604978	7.48	8.11	0.00573	10.47	13.52	0.0859192	12	5.22	0.0361314	8.29	9.69	"Unknown Protein (AHRD V1); contains Interpro domain(s) IPR010471 Protein of unknown function DUF1068 "	2.83109	4.2073	2.86679	2.90524
Solyc01g098650.2.1	1	4.48	9.78	1	11.56	2.13	0.00316	21.08	26.25	0.00893	21.67	17.81	"GDSL esterase/lipase At1g54790 (AHRD V1 ***- GDL22_ARATH); contains Interpro domain(s) IPR001087 Lipase, GDSL "	1.09106	1.01107	3.28318	2.67059
Solyc01g098690.2.1	0.0130318	80.48	53.41	0.0086	79.84	66.28	0.866621	37.99	6.36	0.451245	18.47	19.99	LRR receptor-like serine/threonine-protein kinase, RLP	2.88987	3.02349	-1.13922	-1.3576
Solyc01g098720.2.1	1	0	0.12	1	1.65	0	0.0217393	4.58	5.01	0.0216724	4.5	5.12	"Transcription factor (Fragment) (AHRD V1 *-** D6MJZ9_9ASPA); contains Interpro domain(s) IPR011598 Helix-loop-helix DNA-binding "	-3.14294	1.55502	7.61931	7.46718
Solyc01g098730.2.1	0.523802	89.01	61.23	0.254423	58.13	71.2	0.128694	66.02	51.44	0.00476	40.78	41.02	Unknown Protein (AHRD V1)	-1.26453	-1.52415	-1.78087	-2.63072
Solyc01g098740.2.1	1	0.53	0.09	0.505147	1.28	1.16	0.0627585	1.5	3.41	0.0157252	2.05	5.01	"Receptor protein kinase-like protein (AHRD V1 *-*- Q9LJU5_ARATH); contains Interpro domain(s) IPR002290 Serine/threonine protein kinase "	2.25918	6.81183	12.5606	17.495
Solyc01g098750.2.1	0.124402	21.57	18.32	0.565773	30.71	28.89	0.00879	14.77	12.87	0.00372	13.73	13.45	"RING finger protein B (AHRD V1 *--- RNGB_DICDI); contains Interpro domain(s) IPR018957 Zinc finger, C3HC4 RING-type "	-1.82471	-1.26727	-2.87983	-3.01094
Solyc01g098760.2.1	0.0035	96.4	101.66	0.11419	196.23	123.58	0.00981	116.97	108.47	0.00639	106.25	138.45	"Heavy metal-associated domain containing protein expressed (AHRD V1 *--- Q2RAL3_ORYSJ); contains Interpro domain(s) IPR006121 Heavy metal transport/detoxification protein "	-2.80399	-1.80206	-2.6953	-2.54745
Solyc01g098800.2.1	0.00533	40.18	30.25	0.000348	51.74	56.15	0.302013	37.9	6.56	0.185352	18.63	23.56	"Sodium/calcium exchanger family protein (AHRD V1 *-** C5PBJ7_COCP7); contains Interpro domain(s) IPR004837 Sodium/calcium exchanger membrane region "	2.99075	4.41364	1.73314	1.5939
Solyc01g098910.2.1	0.962006	103.56	68.28	0.304623	129.38	137.92	0.34996	92.92	34.56	0.0378298	53.04	43.37	"Mitochondrial carrier protein (AHRD V1 ***- C5P0Z3_COCP7); contains Interpro domain(s) IPR001993 Mitochondrial substrate carrier "	-1.02031	1.46476	-1.50774	-2.06641
Solyc01g098980.2.1	0.167216	0.33	0.66	0.790287	3.01	1.45	0.0751258	8.27	9.02	0.0269722	9.79	9.45	"Kinesin (AHRD V1 *-*- A6YTD6_CUCME); contains Interpro domain(s) IPR015748 Mitogen activated protein kinase kinase kinase 3 "	-5.04903	-1.3801	2.52979	2.72913
Solyc01g099030.2.1	0.705606	0.58	1.83	1	4.36	1.26	0.0275321	9.26	7.03	0.00339	8.56	11.52	"GDSL esterase/lipase At1g28590 (AHRD V1 **** GDL8_ARATH); contains Interpro domain(s) IPR001087 Lipase, GDSL "	-1.64483	1.30536	3.46391	4.13803
Solyc01g099090.2.1	0.134202	13.77	13.72	0.16043	15.8	12.16	0.0111129	21.3	22.77	0.00588	21.56	22.99	"Beta-mannosidase (AHRD V1 ***- D7IJR3_9BACE); contains Interpro domain(s) IPR013781 Glycoside hydrolase, subgroup, catalytic core "	1.90447	1.87689	2.78128	2.73235
Solyc01g099140.2.1	0.117131	4.33	6.12	0.189958	3.82	5.57	0.097859	5.96	4.3	0.0355635	6.8	6.08	Transmembrane protein 49 (AHRD V1 ***- B6TDW5_MAIZE)	3.12606	2.74641	2.81992	3.42492
Solyc01g099210.2.1	0.563115	5.41	8.21	0.474019	11.43	17.05	0.0183291	3.19	2.01	0.248656	6.28	5.65	"Lipoxygenase (AHRD V1 **** Q0ZDG1_ACTDE); contains Interpro domain(s) IPR001246 Lipoxygenase, plant "	-1.38699	1.4579	-3.83697	-1.77507
Solyc01g099270.2.1	1	0.05	0.19	1	1.49	0.84	0.000412	7.29	9.39	0.00135	8.95	7.78	Microtubule binding protein (AHRD V1 ***- A6YTD5_CUCME)	-3.057	1.64136	10.1429	9.92132
Solyc01g099290.2.1	0.00532	1.57	3.81	0.0450371	7.09	0	1	11.82	16.51	0.920597	17.09	14.36	"Cullin-like protein1 (AHRD V1 ***- Q8LP18_PEA); contains Interpro domain(s) IPR016159 Cullin repeat-like "	-4.70273	-3.76205	-1.01186	1.06872
Solyc01g099330.2.1	0.0292701	2.49	2.25	0.022663	3.74	0.59	0.148809	4.68	4.99	0.275417	7.16	4.64	Os10g0578600 protein (Fragment) (AHRD V1 *-*- Q0IVC7_ORYSJ)	-3.59387	-4.04581	-1.97841	-1.67361
Solyc01g099340.2.1	0.000191	26.93	39.29	0.792902	7.12	11.39	0.762681	8.74	10.39	0.376223	13.61	10.14	"Zinc finger protein (AHRD V1 *--- Q764N7_MALDO); contains Interpro domain(s) IPR007087 Zinc finger, C2H2-type "	4.44127	1.22454	1.19366	1.43846
Solyc01g099370.2.1	0.861452	566.64	416.68	0.441202	610.12	681.14	0.0272828	249.33	41.84	0.00017	124.82	122.03	"SRC2 homolog (Fragment) (AHRD V1 ***- B3IYJ9_9SOLA); contains Interpro domain(s) IPR018029 C2 membrane targeting protein "	1.07096	1.35455	-3.43428	-4.21607
Solyc01g099380.2.1	0.201688	13.21	11.95	0.203419	12.16	13.37	0.0742929	10.79	12.51	0.0324048	14.09	7.48	"U4/U6.U5 tri-snRNP-associated protein 1 (AHRD V1 *--- B0WPY3_CULQU); contains Interpro domain(s) IPR005011 SART-1 protein "	-1.59916	-1.6273	-1.89076	-2.10158
Solyc01g099410.2.1	0.0146102	15.71	53.53	0.64491	157.78	177.05	0.603397	347.84	356.18	0.459753	475.6	358.76	"Histone H2A (AHRD V1 ***- Q8H0G7_TOBAC); contains Interpro domain(s) IPR002119 Histone H2A "	-6.58631	-1.37706	1.43608	1.65019
Solyc01g099420.1.1	0.482433	3.42	3.14	0.0579007	1.83	0	0.0232618	1.18	0.76	0.0578953	2.14	1.16	"Catalase (AHRD V1 ***- Q52PH2_EUPCH); contains Interpro domain(s) IPR002226 Catalase "	-1.58358	-5.34362	-5.36411	-3.39923
Solyc01g099480.2.1	0.0963142	1.27	0.33	0.832375	3.99	2.91	0.026783	0.58	0.64	0.0671458	1.97	0.53	"Unknown Protein (AHRD V1); contains Interpro domain(s) IPR015940 Ubiquitin-associated/translation elongation factor EF1B, N-terminal, eukaryote "	-5.07	-1.36509	-6.89786	-3.81592
Solyc01g099580.1.1	0.0028	4.61	5.76	0.5112	0.43	1.9	1	0.01	0	1	0.24	0.06	"Desiccation-related protein PCC13-62 (AHRD V1 *-*- B6TNA6_MAIZE); contains Interpro domain(s) IPR011424 C1-like "	41.2641	9.95201	1.04061	2.07664
Solyc01g099620.2.1	0.0178226	7.97	5.35	0.0354987	8.48	6.69	0.000456	33.95	298.4	0.0499208	32.06	47.36	"Respiratory burst oxidase-like protein (AHRD V1 **** C1IHQ9_9ROSI); contains Interpro domain(s) IPR013121 Ferric reductase, NAD binding "	-2.57705	-2.34654	8.54992	2.02745
Solyc01g099630.2.1	0.0847376	2.19	42.98	0.00172	34.06	22.47	5.99e-10	167.84	157.18	1.12e-10	115.55	144.44	"Xyloglucan endotransglucosylase/hydrolase 5 (AHRD V1 **** C0IRG4_ACTDE); contains Interpro domain(s) IPR016455 Xyloglucan endotransglucosylase/hydrolase IPR008263 Glycoside hydrolase, family 16, active site "	3.72594	4.60827	25.0461	19.4779
Solyc01g099680.2.1	0.016476	304.6	262.43	0.00308	265.71	191.34	0.000702	226.02	131.92	4.21e-06	148.9	151.5	"REF-like stress related protein 1 (AHRD V1 *--- Q6XNP4_HEVBR); contains Interpro domain(s) IPR008802 Rubber elongation factor "	-2.33924	-3.01812	-4.05441	-4.98773
Solyc01g099800.2.1	0.561661	17.05	15.33	0.0433167	23.64	38.68	0.25359	10.25	7.47	0.174872	9.44	7.9	Unknown Protein (AHRD V1)	1.24453	2.31663	-1.59541	-1.67509
Solyc01g099840.2.1	0.00121	330.1	171.65	0.00641	132.96	327.22	0.400082	142.41	71.76	0.433791	111.21	93.27	"Auxin-repressed protein (AHRD V1 ***- B4FA62_MAIZE); contains Interpro domain(s) IPR008406 Dormancyauxin associated "	3.66265	3.24314	1.4168	1.30525
Solyc01g099860.2.1	0.00151	14.08	17.59	0.000623	16.67	11.21	0.0528635	23.01	31.08	0.0327001	30.55	26.5	"Serine/threonine-protein phosphatase (AHRD V1 **** Q84T16_PHAAT); contains Interpro domain(s) IPR006186 Serine/threonine-specific protein phosphatase and bis(5-nucleosyl)-tetraphosphatase "	-3.24032	-3.79573	-2.08272	-2.02821
Solyc01g099870.1.1	0.00509	0	0.27	0.0312709	1.08	0	0.0217393	0.84	0.26	0.146733	1.84	1.63	"RAG1-activating protein 1 homolog (AHRD V1 **-- R1AP1_DANRE); contains Interpro domain(s) IPR018179 RAG1-activating protein 1 homologue "	-17.7627	-7.22234	-7.45383	-2.8138
Solyc01g099880.2.1	0.502136	0.49	1.79	0.0150458	10.65	0.56	1	0.24	0	1	0.35	0.08	"RAG1-activating protein 1 homolog (AHRD V1 **-- R1AP1_DANRE); contains Interpro domain(s) IPR018179 RAG1-activating protein 1 homologue "	7.91259	34.6255	1.50668	2.04593
Solyc01g099910.2.1	0.177992	2.88	8.11	0.168352	5.33	5.61	3.27e-05	21.53	16.54	0.0021	13.75	10.41	"Epoxide hydrolase (AHRD V1 ***- B3VMR4_NICBE); contains Interpro domain(s) IPR000639 Epoxide hydrolase-like "	2.44777	2.3829	7.71906	4.79126
Solyc01g099980.2.1	0.00454	24.34	20.7	0.242282	11.33	15.33	0.655231	8.77	11.62	0.632746	10.63	10.46	"Glycine-rich protein (AHRD V1 *--- D7M9Z2_ARALY); contains Interpro domain(s) IPR009836 Protein of unknown function DUF1399 "	2.99492	1.72533	1.242	1.24819
Solyc01g100000.2.1	0.0594607	16.74	16.54	1	5.81	12.11	0.0154773	3.28	1.72	0.0120672	1.98	2.1	"F-box protein PP2-B1 (AHRD V1 ***- PP2B1_ARATH); contains Interpro domain(s) IPR001810 Cyclin-like F-box "	2.09246	1.10222	-3.32806	-4.1366
Solyc01g100010.2.1	0.188178	69.47	51.77	0.485662	72.57	83.3	0.000858	34.65	19.94	7.86e-07	22.24	10.8	"F-box protein PP2-B1 (AHRD V1 ***- PP2B1_ARATH); contains Interpro domain(s) IPR001810 Cyclin-like F-box "	-1.5924	-1.28473	-3.87209	-6.61209
Solyc01g100030.2.1	0.156979	1.63	3.13	0.186932	16.33	21.1	0.00024	57.62	67.98	1.48e-05	76.08	69.96	"Deoxyuridine 5&apos-triphosphate nucleotidohydrolase (AHRD V1 ***- D0NVQ2_PHYIN); contains Interpro domain(s) IPR008181 DeoxyUTP pyrophosphatase subfamily 1 "	-3.43889	2.12503	6.66081	7.51615
Solyc01g100090.1.1	1	0	0	0.0439158	1.69	4.23	1	0.18	0	1	0.44	0.08	Wall-associated receptor kinase-like 20 (AHRD V1 ***- WAKLQ_ARATH)	1	23.7342	1.67802	2.90298
Solyc01g100130.2.1	0.332072	24.48	28.23	0.114249	19.68	22.43	0.0723477	17.24	24.14	0.0286297	20.31	19.04	"PHD-finger family protein (AHRD V1 *-*- B6U0S2_MAIZE); contains Interpro domain(s) IPR019787 Zinc finger, PHD-finger "	-1.43467	-1.84542	-1.99866	-2.1553
Solyc01g100200.2.1	0.00735	89.28	87.73	0.0358112	73.71	78.85	0.00776	140.37	80.67	0.0179508	101.79	72.9	"GRAS family transcription factor (AHRD V1 **-* B9GJL6_POPTR); contains Interpro domain(s) IPR005202 GRAS transcription factor "	2.63694	2.20189	3.01532	2.30243
Solyc01g100230.2.1	0.354049	28.45	23.81	0.140507	21.68	21.12	0.000163	6.74	9.47	0.000111	9.32	10.19	"Chaperone protein dnaJ (AHRD V1 ***- B6U761_MAIZE); contains Interpro domain(s) IPR001623 Heat shock protein DnaJ, N-terminal "	-1.43581	-1.81368	-5.03482	-4.29923
Solyc01g100240.2.1	7.73e-05	40.62	34.17	0.000239	33.15	40.99	0.0195956	39.39	12.38	0.000291	38.16	28.55	"Calmodulin-binding protein (AHRD V1 **** D7L2U6_ARALY); contains Interpro domain(s) IPR012416 Calmodulin binding protein-like "	4.86314	4.66465	3.08842	3.84165
Solyc01g100370.2.1	0.000181	20.96	20.25	9.1e-05	22.34	13.9	0.450218	19.47	389.49	0.0100151	49.25	36.48	"Universal stress protein (AHRD V1 ***- B6SNQ1_MAIZE); contains Interpro domain(s) IPR006016 UspA "	-5.26989	-6.21052	1.68312	-2.87214
Solyc01g100390.2.1	1.45e-09	1.55	1.01	8.14e-09	0.36	2.19	2.07e-06	4.43	5.06	3.8e-08	5.13	2.06	"Pyrophosphate-energized proton pump (AHRD V1 ***- B0SRX3_LEPBP); contains Interpro domain(s) IPR004131 Inorganic H+ pyrophosphatase "	-22.6138	-23.3326	-7.15412	-9.63441
Solyc01g100430.2.1	0.0163283	8.25	10.02	0.0667788	14.4	9.29	0.414243	19.42	18.92	0.324321	19.41	17.64	"Ribosomal RNA small subunit methyltransferase A (AHRD V1 ***- RSMA_CYAP8); contains Interpro domain(s) IPR011530 rRNA adenine dimethylase "	-2.55512	-2.04083	-1.33922	-1.4263
Solyc01g100440.1.1	1.31e-07	0.16	0.1	2.62e-06	0.77	0	0.322259	4.25	21.57	0.498773	20.58	13.76	Transcription regulatory protein SNF5 (AHRD V1 *-*- D3B6R9_POLPA)	-77.5593	-39.7949	-1.6805	-1.29075
Solyc01g100510.2.1	0.0171626	2.8	1.91	0.0384123	2.8	3.12	0.00557	2.48	2.53	0.00103	1.19	2.33	"Knotted-like homeobox protein (AHRD V1 ***- Q49RB7_POPTO); contains Interpro domain(s) IPR001356 Homeobox IPR005539 ELK IPR017970 Homeobox, conserved site "	-4.32757	-3.59547	-4.45721	-6.35933
Solyc01g100530.2.1	9.95e-06	48.25	42.09	0.00972	28.35	18.71	0.173015	16.6	11.62	0.00905	20.05	21.02	"Protein EFR3 homolog A (AHRD V1 *--- EFR3A_HUMAN); contains Interpro domain(s) IPR016024 Armadillo-type fold "	6.45085	3.24435	1.84602	2.59784
Solyc01g100660.2.1	0.179866	26.09	54.65	0.0154515	30.83	23.07	0.641011	69.32	107.61	0.536386	66.38	55.61	Transcription factor (AHRD V1 ***- D7L4N5_ARALY)	-1.67909	-2.56652	1.2008	-1.23943
Solyc01g100710.2.1	0.796679	27.45	20.89	0.158459	8.71	16.42	3.81e-05	4.58	4.61	3.33e-06	4.98	2.72	Unknown Protein (AHRD V1)	1.11201	-1.77717	-5.07505	-6.20487
Solyc01g100760.2.1	0.502674	0.11	1.6	0.00197	16.47	1.74	0.000277	5.93	7.99	0.000993	7	5.24	"Susceptibility homeodomain transcription factor (Fragment) (AHRD V1 *-*- Q8SAA7_ORYSA); contains Interpro domain(s) IPR007493 Protein of unknown function DUF538 "	4.3245	39.1282	29.2929	25.313
Solyc01g100770.2.1	0.500195	0.64	0.98	0.000238	20.74	3.42	0.500207	0.83	0.85	0.125229	3.12	0.81	"Susceptibility homeodomain transcription factor (Fragment) (AHRD V1 *-*- Q8SAA7_ORYSA); contains Interpro domain(s) IPR007493 Protein of unknown function DUF538 "	3.35745	42.1138	3.25547	6.85472
Solyc01g100900.2.1	0.0066	10.06	9.55	0.0862292	5.41	8.04	0.687887	1.51	0.68	1	1.72	2.75	"MtN21 nodulin protein-like (AHRD V1 ***- B6TBZ6_MAIZE); contains Interpro domain(s) IPR000620 Protein of unknown function DUF6, transmembrane "	4.37436	2.92877	-2.01809	-1.07138
Solyc01g100920.2.1	0.135024	3.12	3.45	0.0341666	6.09	3.44	1	1.26	0.05	0.625229	1.61	1.31	"Nodulin-like protein (AHRD V1 ***- Q84TV1_GOSHI); contains Interpro domain(s) IPR000620 Protein of unknown function DUF6, transmembrane "	9.17982	12.8115	1.9668	3.90421
Solyc01g100930.2.1	0.753204	0.54	4.19	0.186897	5.02	3.91	0.000497	15.57	11.08	0.000259	12.09	13.48	"GDSL esterase/lipase At1g09390 (AHRD V1 ***- GDL2_ARATH); contains Interpro domain(s) IPR001087 Lipase, GDSL "	1.33885	2.40484	6.65529	6.20358
Solyc01g100950.2.1	0.000475	43.14	33.53	0.00385	22.78	49.18	1	10.24	9.85	0.759005	8.64	9.98	"Glucose-6-phosphate 1-dehydrogenase (AHRD V1 ***- B9RFN8_RICCO); contains Interpro domain(s) IPR001282 Glucose-6-phosphate dehydrogenase "	3.9572	3.60873	-1.04846	-1.16044
Solyc01g100970.2.1	0.0361031	227.61	194.24	0.151021	159.43	193.21	0.476982	148.46	144.03	0.679435	126.79	137.81	"Pyrrolidone-carboxylate peptidase (AHRD V1 **** B6SP89_MAIZE); contains Interpro domain(s) IPR000816 Peptidase C15, pyroglutamyl peptidase I "	2.06507	1.6699	1.30291	1.1475
Solyc01g101030.2.1	1	0.43	1.58	0.206537	2.85	6.31	0.0161148	7.95	7.31	0.00275	9.97	8.73	"FACT complex subunit SPT16 (AHRD V1 ***- D3AWW1_POLPA); contains Interpro domain(s) IPR013953 FACT complex subunit Spt16p/Cdc68p "	-1.40782	2.88131	4.45746	5.29856
Solyc01g101050.2.1	0.000863	46.58	31.02	0.000303	41.64	27.55	4.51e-05	26.91	28.93	1.19e-06	23.5	23.89	"Peroxidase 1 (AHRD V1 **** B6T173_MAIZE); contains Interpro domain(s) IPR002016 Haem peroxidase, plant/fungal/bacterial "	-4.19004	-4.90814	-6.42274	-7.76589
Solyc01g101060.2.1	0.081064	1540.9	899.24	0.0215916	1150.79	2105.77	0.533947	593.94	481.13	0.221371	405.39	511.4	"S-adenosylmethionine synthase (AHRD V1 ***- B8LFH4_IPOBA); contains Interpro domain(s) IPR002133 S-adenosylmethionine synthetase "	1.96557	2.52928	-1.27745	-1.53888
Solyc01g101070.2.1	0.000148	5.93	11.55	1.4e-05	7.53	5.69	1.5e-06	5.44	5.38	1.82e-06	6.84	7.5	"ABC transporter G family member 37 (AHRD V1 ***- AB37G_ARATH); contains Interpro domain(s) IPR013525 ABC-2 type transporter "	-4.41038	-5.96393	-7.68117	-5.9882
Solyc01g101120.2.1	9.79e-06	14.06	14.67	4.87e-05	20.84	9.19	0.456364	38.03	85.83	0.265639	62.65	56.39	"Glucan endo-1 3-beta-glucosidase 1 (AHRD V1 *-*- B4FGE4_MAIZE); contains Interpro domain(s) IPR012946 X8 "	-5.23302	-5.19835	-1.34609	-1.43196
Solyc01g101130.2.1	0.873823	25.57	20.47	0.854369	30.22	27.44	0.0340355	12.46	9.36	0.0444894	12.97	12.02	Plant IF-like protein (AHRD V1 ***- B6TAT2_MAIZE)	-1.09919	1.09715	-2.52782	-2.2747
Solyc01g101180.2.1	1	0.25	0.09	1	0	0	0.00422	5.98	3.07	1	0.29	0.14	"Alpha-humulene/(-)-(E)-beta-caryophyllene synthase (AHRD V1 **** HUMS_ARATH); contains Interpro domain(s) IPR005630 Terpene synthase, metal-binding domain "	2.30252	1	34.694	2.5754
Solyc01g101190.2.1	1	0	0	1	0	0	0.0021	3.68	6.63	0.250229	2.7	0.67	"Alpha-humulene/(-)-(E)-beta-caryophyllene synthase (AHRD V1 **** HUMS_ARATH); contains Interpro domain(s) IPR005630 Terpene synthase, metal-binding domain "	1	1	39.3624	13.3999
Solyc01g101210.2.1	1	0	0	1	0	0	0.00604	2.21	7.53	1	0.61	0.23	"Alpha-humulene/(-)-(E)-beta-caryophyllene synthase (AHRD V1 **** HUMS_ARATH); contains Interpro domain(s) IPR005630 Terpene synthase, metal-binding domain "	1	1	37.2109	4.05661
Solyc01g102300.2.1	0.0486009	5.56	8.62	0.0245239	6.43	10.8	0.186466	4.93	6.18	0.267803	5.58	4.53	"BHLH transcription factor (AHRD V1 *-** B6TXR4_MAIZE); contains Interpro domain(s) IPR011598 Helix-loop-helix DNA-binding "	3.55013	4.19992	2.56644	2.27732
Solyc01g102330.2.1	0.0426019	0.97	7.15	0.522646	16.1	10.38	0.160193	27.55	72.44	0.428864	27.11	38.91	"Acetyl xylan esterase A (AHRD V1 **-- D0TLQ4_9BACE); contains Interpro domain(s) IPR005181 Protein of unknown function DUF303, acetylesterase putative "	-4.69072	-1.49617	2.35545	1.52941
Solyc01g102350.2.1	4.12e-06	21.38	21.95	0.0365043	70.57	45.31	0.338385	104.05	79.84	0.276836	90.33	100.1	"Pectinacetylesterase like protein (Fragment) (AHRD V1 *--- Q56WP8_ARATH); contains Interpro domain(s) IPR004963 Pectinacetylesterase "	-5.54303	-2.15675	-1.43342	-1.42452
Solyc01g102360.1.1	7.29e-24	235.62	228.12	8.51e-14	51.9	74.64	1	0.01	0.04	0.0313931	3.07	3.41	"Peptide transporter-like protein (AHRD V1 **-* Q9LSE8_ARATH); contains Interpro domain(s) IPR000109 TGF-beta receptor, type I/II extracellular region "	1560.84	420.109	1.01761	21.2312
Solyc01g102380.2.1	0.00444	10.52	15.3	9.06e-09	2.41	2.17	0.0038	14.61	11.28	0.0686702	28.48	15.37	"Germin-like protein (AHRD V1 ***- O64439_SOLLC); contains Interpro domain(s) IPR019780 Germin, manganese binding site "	-2.89601	-16.0448	-3.14502	-1.92757
Solyc01g102420.1.1	0.000266	51.02	64.06	0.0319794	24.36	52.21	0.190866	7.67	10.42	0.0106286	6.91	5.85	Unknown Protein (AHRD V1)	3.92233	2.55816	-1.74566	-2.52454
Solyc01g102450.2.1	0.0101418	0.4	0	1	0.55	8.01	0.033897	1.2	0.18	0.016874	0.33	1.11	"Transmembrane protein 34 (AHRD V1 ***- A9UM61_XENTR); contains Interpro domain(s) IPR005178 Protein of unknown function DUF300 "	-14.7351	-1.11526	-6.48907	-6.40779
Solyc01g102490.2.1	4.18e-05	5.95	6.65	0.105471	26.86	8.14	0.10498	24.78	14.05	0.123431	20.9	23.68	"NADPH adrenodoxin oxidoreductase fprA (NADPH-ferredoxin reductase) (AHRD V1 **-* A2VNR6_MYCTU); contains Interpro domain(s) IPR000759 Adrenodoxin reductase "	-5.49534	-2.08756	-1.97084	-1.76931
Solyc01g102500.2.1	0.0180362	14.3	15.85	0.0509078	16.7	17.92	0.0164651	17.89	12.69	0.0146001	18.52	15.54	Genomic DNA chromosome 5 TAC clone K1F13 (AHRD V1 *-*- Q9FJZ1_ARATH)	-2.384	-2.14118	-2.5654	-2.37626
Solyc01g102520.2.1	1	2.92	2.07	1	4.39	3.38	0.00354	11.51	13.62	0.0045	12.86	10.71	"MLO-like protein 1 (AHRD V1 ***- Q94CG7_MAIZE); contains Interpro domain(s) IPR004326 Mlo-related protein "	-1.1531	1.28593	3.84134	3.51273
Solyc01g102530.2.1	0.227038	29.54	28.27	0.158039	32.07	22.09	0.0484361	25.64	19.61	0.0394857	25.73	24	"SNARE associated Golgi protein (AHRD V1 *--- B7KHF6_CYAP7); contains Interpro domain(s) IPR015414 SNARE associated Golgi protein "	-1.54741	-1.71227	-2.16039	-2.02594
Solyc01g102650.2.1	0.0411662	21	20.09	0.195839	13.36	20.06	0.344279	5.03	7.85	0.409803	6.84	7.7	Unknown Protein (AHRD V1)	2.20305	1.74121	-1.56237	-1.42217
Solyc01g102660.2.1	0.00122	241.58	291.98	0.130486	140.52	161.3	0.833472	99.45	101.39	1	100.88	88.01	"Maleylacetoacetate isomerase / glutathione S-transferase (AHRD V1 ***- Q6MR10_BDEBA); contains Interpro domain(s) IPR005955 Maleylacetoacetate isomerase "	3.1624	1.74246	1.09129	-1.00261
Solyc01g102680.2.1	0.480714	70.99	66.84	0.785568	45.26	53.83	1.87e-05	8.9	9.7	1.64e-05	13.48	10.42	Receptor like kinase, RLK	1.29023	-1.11185	-6.22536	-5.00068
Solyc01g102700.2.1	0.00242	70.15	55.01	0.00289	68.22	61.51	0.000225	51.12	44.66	2.96e-05	49.03	49.6	Receptor like kinase, RLK	-3.07127	-3.0776	-4.41076	-4.40716
Solyc01g102800.2.1	0.725007	12.26	17.47	1	23.16	12.79	0.0531546	38.27	42.77	0.0476834	42.76	37.27	"Histidyl-tRNA synthetase (AHRD V1 *-*- Q52NV4_HUMAN); contains Interpro domain(s) IPR015807 Histidyl-tRNA synthetase, class IIa, subgroup "	-1.17415	-1.00293	2.1187	2.03287
Solyc01g102840.2.1	0.00062	190.98	108.18	0.000433	123	204.43	0.813425	62.26	9.1	0.102919	24.51	22.17	Tir-nbs, resistance protein fragment	4.00555	4.22131	-1.14446	-1.81412
Solyc01g102850.1.1	0.00966	4.46	6.48	0.505341	0.91	0.71	1	0.41	0.39	1	0.66	0.33	Tir-nbs-lrr, resistance protein	16.055	2.62539	1.41991	1.64686
Solyc01g102890.2.1	9.83e-07	155.28	69.42	3.96e-06	74.92	104.61	0.00061	55.47	59.35	1.31e-08	125.46	107.35	"Germin-like protein 4 (AHRD V1 ***- A8QK90_VITVI); contains Interpro domain(s) IPR014710 RmlC-like jelly roll fold "	8.39087	6.4176	3.85579	7.58716
Solyc01g102900.2.1	0.000162	71.95	36.05	0.00632	35.07	30.26	1.86e-06	94.03	76.41	5.44e-11	142.86	144.62	"Germin-like protein 4 (AHRD V1 ***- A8QK90_VITVI); contains Interpro domain(s) IPR014710 RmlC-like jelly roll fold "	5.07221	2.93738	7.22629	11.8378
Solyc01g102910.2.1	2.82e-12	169.07	90.79	4.34e-11	97.24	94.19	4.32e-07	58	43.53	1.85e-15	135.49	180.34	"Germin-like protein 4 (AHRD V1 ***- A8QK90_VITVI); contains Interpro domain(s) IPR014710 RmlC-like jelly roll fold "	29.9527	21.1218	10.6062	32.0849
Solyc01g102940.2.1	0.656733	19.1	28.25	0.520091	35.51	18.8	0.0608914	51.42	40.69	0.022331	50.58	51.4	"Methionine s-methyltransferase (AHRD V1 **** B9N0J3_POPTR); contains Interpro domain(s) IPR015424 Pyridoxal phosphate-dependent transferase, major region "	1.19038	1.32345	2.12769	2.28426
Solyc01g103000.1.1	6.44e-06	11.49	9.72	0.012027	2.02	7.06	0.500207	0.61	1.56	0.250229	1.1	1.93	Unknown Protein (AHRD V1)	83.5461	35.976	9.0675	12.1382
Solyc01g103030.2.1	0.0011	21.34	18.35	0.000534	21	14.54	0.000261	20.02	13.58	0.000183	22.32	18.88	"Nitrate transporter (AHRD V1 **** Q7XAK5_PRUPE); contains Interpro domain(s) IPR000109 TGF-beta receptor, type I/II extracellular region "	-3.38738	-3.92234	-4.37638	-3.68667
Solyc01g103060.2.1	0.190367	12.9	29.57	0.0415504	60.29	12.41	0.0166333	36	32.24	0.00575	40.79	33.48	"Non-specific lipid-transfer protein (AHRD V1 ***- B9RGU5_RICCO); contains Interpro domain(s) IPR003612 Plant lipid transfer protein/seed storage/trypsin-alpha amylase inhibitor "	1.7996	2.95883	2.66966	2.82164
Solyc01g103070.2.1	1	1.38	1.11	0.0882589	5.3	4.15	0.0002	12.96	8.93	0.0001	12.25	12.93	Unknown Protein (AHRD V1)	1.1514	3.93818	8.5198	9.53001
Solyc01g103110.2.1	0.0821892	9.88	6.59	0.468285	10.68	13.98	0.000977	5.12	3.71	0.00363	6.34	5.68	"Unknown Protein (AHRD V1); contains Interpro domain(s) IPR007434 Protein of unknown function DUF482 "	-2.01301	-1.39702	-4.0567	-3.08716
Solyc01g103140.2.1	0.0778909	0.77	1.2	0.031741	1.33	0	0.819534	4.08	4.85	1	5.59	4.42	"Voltage-gated chloride channel (AHRD V1 **** Q96325_ARATH); contains Interpro domain(s) IPR002251 Chloride channel plant CLC "	-4.33622	-6.26331	-1.14732	-1.05453
Solyc01g103170.2.1	0.17069	23.58	20.91	0.9435	41.7	38.63	0.0264455	20.02	12.71	0.238158	24.38	30.59	"Lysine ketoglutarate reductase trans-splicing related 1-like (AHRD V1 ***- Q5JLN0_ORYSJ); contains Interpro domain(s) IPR007877 Protein of unknown function DUF707 "	-1.67178	1.04077	-2.48112	-1.52414
Solyc01g103200.2.1	0.00711	28.79	30.92	0.0864065	49.29	34.72	0.0457719	38.33	41.77	0.0421181	43.91	44.64	Unknown Protein (AHRD V1)	-2.51701	-1.85373	-2.0563	-1.91159
Solyc01g103220.2.1	0.00211	136.29	159.49	0.188693	246.4	285.62	0.139102	286.7	228.3	0.0696386	267.47	252.87	"Cytochrome c (AHRD V1 ***- B6SKR4_MAIZE); contains Interpro domain(s) IPR002327 Cytochrome c, class IA/ IB "	-2.73108	-1.5608	-1.71054	-1.74513
Solyc01g103250.2.1	0.30287	6.47	6.92	0.196565	7.02	8.29	0.0202198	13.35	10.87	0.0129727	12.27	12.24	"Histone-lysine N-methyltransferase NSD3 (AHRD V1 *--- NSD3_HUMAN); contains Interpro domain(s) IPR018144 Plus-3 domain, subgroup "	1.80568	1.99763	2.96681	2.92051
Solyc01g103260.2.1	0.316492	3.78	2.05	0.0187069	4.1	10.07	0.00892	7.51	6.05	0.013123	6.53	5.94	Unknown Protein (AHRD V1)	3.20176	7.37121	6.68681	6.00322
Solyc01g103290.2.1	1	0.99	0	1	0.91	0	0.687887	2.61	1.31	0.0389187	7.42	3.6	Unknown Protein (AHRD V1)	-1.68586	-1.85669	1.82969	4.80212
Solyc01g103360.2.1	0.568524	4.14	3.5	1	3.56	1.27	0.00466	11.73	10.95	0.144499	6.56	6.11	"Expressed protein (Fragment) (AHRD V1 ***- B3VV14_POPTN); contains Interpro domain(s) IPR006514 Protein of unknown function DUF579, plant "	1.69916	1.06097	4.52482	2.48302
Solyc01g103390.2.1	0.020582	355.56	527.73	0.000428	249.82	297.84	8.25e-10	60.43	87.98	9.79e-12	85.94	85.36	"Flavin oxidoreductase/NADH oxidase (AHRD V1 **-- A0YMI2_LYNSP); contains Interpro domain(s) IPR001155 NADH:flavin oxidoreductase/NADH oxidase, N-terminal "	-2.31154	-3.80932	-14.9741	-13.3014
Solyc01g103400.2.1	0.0104181	25.82	28.34	0.00706	25.89	24.4	0.0800116	29.13	45.64	0.0153948	35.3	32.31	Unknown Protein (AHRD V1)	-2.43475	-2.70327	-1.93782	-2.19626
Solyc01g103430.2.1	0.00157	66.13	44.14	0.0542147	38.18	33.44	0.806877	21.36	18.38	0.858532	17.61	21.35	"Glycogen synthase kinase (AHRD V1 **** C7AE95_SOYBN); contains Interpro domain(s) IPR002290 Serine/threonine protein kinase "	3.40585	2.12682	1.11908	1.0678
Solyc01g103460.2.1	0.0417728	21.81	17.54	0.719438	8.96	13.45	0.783535	12.48	10.33	1	10.26	9.99	"3&apos-5&apos exonuclease (AHRD V1 ***- B0WTA6_CULQU); contains Interpro domain(s) IPR002562 3'-5' exonuclease "	2.20052	1.21961	1.16997	1.01228
Solyc01g103470.2.1	0.0151067	2.69	10.58	0.452341	20.95	6.31	0.626102	20.03	12.97	0.359966	18.95	11.72	Unknown Protein (AHRD V1)	-2.83894	-1.43881	-1.24994	-1.38711
Solyc01g103490.2.1	0.00901	12.62	12.32	0.142221	21.67	16.3	0.520305	31.82	22.61	0.341766	26.62	25.88	"Necrotic spotted lesions 1 (Fragment) (AHRD V1 *-*- B6ZA21_HELAN); contains Interpro domain(s) IPR001862 Membrane attack complex component/perforin/complement C9 "	-2.60261	-1.77522	-1.31026	-1.39954
Solyc01g103510.2.1	0.016454	11.51	23.34	0.532507	42.23	31.33	0.884183	45.31	48.92	0.706034	58.99	59.43	"Ribosomal protein L3-like (AHRD V1 ***- Q2VCJ2_SOLTU); contains Interpro domain(s) IPR000597 Ribosomal protein L3 "	-2.63299	-1.28362	-1.06129	1.15129
Solyc01g103530.2.1	0.0207126	13.26	11.65	0.292794	9.43	6.62	0.00156	15.26	22.65	1.66e-05	26.62	24.11	Receptor like kinase, RLK	2.90173	1.81674	4.01438	5.22644
Solyc01g103580.2.1	0.0630807	118.58	83.77	0.0273737	111.13	130.36	0.156553	44.37	12.41	0.0172389	29.72	17.99	"Genomic DNA chromosome 5 P1 clone MCL19 (AHRD V1 ***- Q9FNL3_ARATH); contains Interpro domain(s) IPR007770 Protein of unknown function DUF679 "	2.0033	2.30299	-1.94103	-2.39947
Solyc01g103590.2.1	1.3e-05	80.39	75.21	0.00177	150.28	45.93	1.67e-05	85.47	40.43	0.0041	169.11	157.74	"Glyoxalase/bleomycin resistance protein/dioxygenase (AHRD V1 **-- Q2HVV5_MEDTR); contains Interpro domain(s) IPR004360 Glyoxalase/bleomycin resistance protein/dioxygenase "	-4.80262	-3.98925	-6.47234	-2.58317
Solyc01g103600.2.1	2.03e-14	100.24	94.89	2.53e-06	18.74	48.64	0.509673	3.35	3.58	0.180496	4.39	5.9	"Protein TIFY 3A (AHRD V1 **-- TIF3A_ARATH); contains Interpro domain(s) IPR010399 Tify "	54.4362	18.3846	1.8428	2.63264
Solyc01g103630.2.1	0.000581	3.03	2.09	0.0605947	8.21	5.05	8.05e-08	0.75	0	6.29e-06	2	1.14	"Glyoxalase/bleomycin resistance protein/dioxygenase (AHRD V1 ***- Q2HVV5_MEDTR); contains Interpro domain(s) IPR004360 Glyoxalase/bleomycin resistance protein/dioxygenase "	-5.84551	-2.40828	-33.6343	-10.3559
Solyc01g103660.2.1	0.0280149	2.19	6.07	0.449505	7.44	8.93	0.000528	3.64	1.34	0.0171798	5.4	4.39	Alpha/beta hydrolase fold (AHRD V1 *--- B0KN71_PSEPG)	-2.84296	-1.49489	-5.02609	-2.69828
Solyc01g103700.2.1	1	0.48	1.04	1	0.22	0	0.0157609	3.39	3.56	0.0313931	3.63	2.42	"Unknown Protein (AHRD V1); contains Interpro domain(s) IPR008545 Protein of unknown function DUF827, plant "	3.73467	-1.00893	14.2131	12.1979
Solyc01g103760.2.1	0.760191	8.43	8.54	0.22304	14.48	10.58	0.164638	16.14	11.55	0.00789	17.93	23.79	"DUF803 domain membrane protein (AHRD V1 **-- C1GHB7_PARBD); contains Interpro domain(s) IPR008521 Protein of unknown function DUF803 "	1.2538	1.78578	1.86137	2.71756
Solyc01g103780.2.1	0.0781222	9.14	12.38	0.0407133	10.74	15.29	0.168619	12.01	7.08	0.234637	8.72	9.12	"TCP family transcription factor (AHRD V1 *-** A6MCZ2_9ORYZ); contains Interpro domain(s) IPR005333 Transcription factor, TCP "	2.31984	2.73035	1.89191	1.71651
Solyc01g103790.2.1	0.020488	0	3.47	0.13859	2.67	4.12	1	5.6	10.47	1	10.88	5.2	"Wall-associated receptor kinase-like 9 (AHRD V1 ***- WAKLH_ARATH); contains Interpro domain(s) IPR011009 Protein kinase-like "	-4.17973	-2.26216	-1.03663	-1.06336
Solyc01g103800.2.1	0.0302627	61.11	67.21	0.695303	131.8	110.95	0.598927	182.18	176.33	0.486429	190.78	189.35	"40S ribosomal protein S12 (AHRD V1 ***- A9P9K3_POPTR); contains Interpro domain(s) IPR000530 Ribosomal protein S12e "	-2.10121	-1.14811	1.21472	1.25196
Solyc01g103850.2.1	0.0585355	18.72	19.34	0.0410015	19.05	26.55	0.120218	17.74	18.38	0.131465	18.26	16.37	"Ubiquitin-like domain containing CTD phosphatase 1 (AHRD V1 ***- B6TA38_MAIZE); contains Interpro domain(s) IPR011943 HAD-superfamily hydrolase, subfamily IIID "	2.11078	2.46098	1.831	1.7039
Solyc01g103880.2.1	0.00362	9.52	6.09	0.00675	12.56	1.77	0.0448716	11.38	15.05	0.0628762	16.97	12.82	BZIP transcription factor family protein expressed (AHRD V1 *--- Q2R8T2_ORYSJ)	-3.27472	-3.73114	-2.14237	-1.95538
Solyc01g103960.2.1	0.741263	1.56	2.07	1	3.02	3.07	0.0167299	9.31	10.31	0.0113108	10.31	9.27	"ATP-dependent DNA helicase Q1 (AHRD V1 *-** C1GRE2_PARBA); contains Interpro domain(s) IPR004589 DNA helicase, ATP-dependent, RecQ type "	-1.30965	1.21271	3.57242	3.46468
Solyc01g103970.2.1	0.095538	10.56	5.52	0.000392	17.26	17.9	0.354742	7.55	4.57	0.117853	8.64	6.36	"RING finger protein 170 (AHRD V1 ***- C1BQ68_9MAXI); contains Interpro domain(s) IPR018957 Zinc finger, C3HC4 RING-type "	2.65556	5.56062	1.83396	2.1973
Solyc01g104030.2.1	0.000632	31.47	31.09	0.0245751	25.68	17.34	0.002	29.49	31.16	0.00203	28.4	26.77	"Inward rectifier potassium channel-like protein (Fragment) (AHRD V1 *-** Q1W7D1_SOLLC); contains Interpro domain(s) IPR000595 Cyclic nucleotide-binding "	4.39058	2.91509	3.88706	3.45087
Solyc01g104140.2.1	0.358193	20.06	27.27	0.354756	24.22	24.42	0.0282764	15.9	15.59	0.0189939	17.42	16.14	"Phosphatidylinositol-4-phosphate 5-kinase family protein (AHRD V1 ***- D7KLK6_ARALY); contains Interpro domain(s) IPR017163 Phosphatidylinositol-4-phosphate 5-kinase, plant "	-1.41963	-1.41949	-2.31899	-2.23834
Solyc01g104190.2.1	0.213922	9.8	6.74	0.02963	15.21	11.42	8.12e-05	27.37	22.33	8.13e-05	24.06	19.8	Unknown Protein (AHRD V1)	1.91256	2.95526	5.19778	4.46208
Solyc01g104230.2.1	0.0144303	0	0.34	0.3693	3.74	1.98	1	6.95	6.61	0.630073	8.92	10.28	F-box family protein (AHRD V1 ***- D7KLJ3_ARALY)	-21.3953	-2.21243	-1.01695	1.34342
Solyc01g104240.2.1	0.00673	23.29	20.91	0.00138	22.94	37.88	0.266185	13.91	11.86	0.255254	15.89	10.88	Hydroxyproline-rich glycoprotein-like (AHRD V1 *-*- Q5JLQ2_ORYSJ)	2.9292	3.91401	1.56606	1.57986
Solyc01g104280.2.1	0.0314555	7.3	5.8	0.744444	3.92	1.68	0.390434	5.01	3.78	0.549515	4.21	3.63	"Elongation of very long chain fatty acids-like 2 protein (AHRD V1 **** D4N2R0_MELGA); contains Interpro domain(s) IPR002076 GNS1/SUR4 membrane protein "	3.67543	1.5615	2.28171	1.99029
Solyc01g104300.2.1	0.62538	11.95	13.67	0.332471	11.08	11.04	0.0431667	7.26	8.08	0.0523392	9.23	8.59	"Unknown Protein (AHRD V1); contains Interpro domain(s) IPR006927 Protein of unknown function DUF639 "	-1.24604	-1.48553	-2.25843	-1.99935
Solyc01g104400.2.1	0.521565	49.38	38.63	0.939585	48.2	21.15	2.84e-06	315.5	196.07	5.23e-08	217.03	324.68	"Blue copper protein (AHRD V1 **-- B6U7P6_MAIZE); contains Interpro domain(s) IPR003245 Plastocyanin-like "	1.26809	-1.045	6.71069	6.91561
Solyc01g104530.2.1	0.167974	22.46	23.77	0.214097	26.63	22.9	0.231189	27.63	25.19	0.0388188	20.12	21.71	"Protein serine/threonine kinase (AHRD V1 *-** D3BP85_POLPA); contains Interpro domain(s) IPR002290 Serine/threonine protein kinase "	-1.66235	-1.60332	-1.59211	-2.06348
Solyc01g104570.2.1	0.738194	1.93	3.54	1	3.64	0.61	0.00101	9.61	12.13	0.000633	12.84	8.43	"Kinetochore protein ndc80 (AHRD V1 *-*- B6K5V0_SCHJY); contains Interpro domain(s) IPR005550 Kinetochore protein Ndc80 "	1.77478	1.35367	6.2518	5.95235
Solyc01g104580.2.1	0.00227	10.68	13.99	0.020229	9.23	10.45	0.0483186	8.3	7.95	0.0427938	7.44	8.64	"Harpin-induced protein 1 containing protein expressed (AHRD V1 ***- Q10NQ5_ORYSJ); contains Interpro domain(s) IPR010847 Harpin-induced 1 "	5.15291	4.01034	3.13143	3.01698
Solyc01g104650.2.1	0.144852	6.51	11.32	0.0105897	4.97	5.43	0.23668	5.96	15.89	0.0917423	11.09	9.12	"BZIP transcription factor (AHRD V1 **** Q53UC6_WHEAT); contains Interpro domain(s) IPR011700 Basic leucine zipper "	-1.80834	-3.15343	-1.61859	-1.7894
Solyc01g104660.2.1	0.463589	18.42	22.03	0.422676	17.82	22.18	0.159496	15.32	18.3	0.0376419	15.39	13.28	"Exocyst subunit Exo70-interacting protein Roh1 (Fragment) (AHRD V1 *-*- C1IJU1_TOBAC); contains Interpro domain(s) IPR008511 Protein of unknown function DUF793 "	-1.32106	-1.37375	-1.73553	-2.08734
Solyc01g104710.2.1	0.325812	1.06	4.68	0.0235546	5.25	6.8	0.000693	7.95	11.07	0.00241	7.88	8.35	Unknown Protein (AHRD V1)	2.96468	5.94345	8.80715	7.34467
Solyc01g104720.2.1	1	5.75	2.24	1	7.32	1.39	1.06e-06	37.38	47.77	2.04e-06	44.23	28.19	Unknown Protein (AHRD V1)	-1.09905	-1.05125	8.58209	7.09671
Solyc01g104740.2.1	0.672312	4.03	4.7	1	2.84	7.31	0.0038	31.3	14.77	0.107566	11.81	13.44	"Multiprotein bridging factor 1 (AHRD V1 ***- C8C4P8_WHEAT); contains Interpro domain(s) IPR013729 Multiprotein bridging factor 1, N-terminal "	-1.29091	-1.143	3.67406	1.95909
Solyc01g104760.2.1	0.0702032	3.59	3.17	0.540577	2.17	11.27	0.0039	2.03	2.94	0.000931	2.08	1.64	Homeodomain-like (AHRD V1 *-*- A7UQU9_MEDTR)	-2.74331	-1.43864	-4.02372	-5.42576
Solyc01g104770.2.1	0.0193003	244.16	185.81	0.00361	188.77	170.64	7.94e-06	94.7	92.84	3.78e-08	71.62	89.49	"Actin (AHRD V1 ***- Q6F4H4_TOBAC); contains Interpro domain(s) IPR004000 Actin/actin-like "	-2.25308	-2.80254	-5.68762	-6.79086
Solyc01g104780.2.1	8.41e-08	0.68	0.54	2.26e-06	0.62	1.56	1.02e-06	2.61	0.69	2.9e-08	0.81	1.42	"Nodulin-related integral membrane protein DUF125 (AHRD V1 *-*- C7JBI4_ACEP3); contains Interpro domain(s) IPR008217 Protein of unknown function DUF125, transmembrane "	-25.2376	-15.711	-11.4041	-16.7726
Solyc01g104800.2.1	7.69e-05	7.75	8.25	0.139657	1.49	3.06	1	0.18	0	1	0.24	0.14	"Integral membrane protein (AHRD V1 ***- B6U6B5_MAIZE); contains Interpro domain(s) IPR008217 Protein of unknown function DUF125, transmembrane "	37.7666	10.9439	-1.03069	1.3933
Solyc01g104810.2.1	0.0183678	3.66	3.19	1	0.67	0	1	0.08	0	1	0.15	0.21	"Integral membrane protein (AHRD V1 ***- B6U6B5_MAIZE); contains Interpro domain(s) IPR008217 Protein of unknown function DUF125, transmembrane "	14.0622	1.79911	-1.53177	1.1562
Solyc01g104830.2.1	0.0160089	4.21	5.84	0.660199	0	3.28	1	0.21	0.27	1	0.43	0.51	"Nodulin-related integral membrane protein DUF125 (AHRD V1 *-*- C7JBI4_ACEP3); contains Interpro domain(s) IPR008217 Protein of unknown function DUF125, transmembrane "	7.32062	2.47014	-2.02935	-1.29716
Solyc01g104880.2.1	0.230851	38.94	40.67	0.0267705	28.91	24.37	0.233791	40.23	44.83	0.0719925	36.4	37.23	"Phosphatidylserine decarboxylase proenzyme 2 (AHRD V1 **** D3AWK7_POLPA); contains Interpro domain(s) IPR005221 Phosphatidylserine decarboxylase "	-1.55152	-2.39192	-1.59132	-1.88636
Solyc01g104900.2.1	0.0356018	18.77	17.06	7.6e-06	4.78	7.17	3.3e-05	3.63	10.66	4.5e-07	8.43	4.72	"NAC domain protein IPR003441 (AHRD V1 ***- B9GZS1_POPTR); contains Interpro domain(s) IPR003441 No apical meristem (NAM) protein "	-2.16767	-6.61128	-5.91505	-6.58304
Solyc01g104910.2.1	0.053407	74.88	77.09	0.970582	41.04	38.94	0.0369257	20.45	19.04	0.492208	25.76	44.4	Os11g0223400 protein (Fragment) (AHRD V1 *--- Q0ITS2_ORYSJ)	1.91016	-1.02552	-2.19414	-1.26798
Solyc01g104950.2.1	0.517681	11.8	18.45	0.265137	18.39	5.37	0.00832	58.94	99.17	0.0114958	49.37	96.97	"Alpha-L-arabinofuranosidase/beta-D-xylosidase (AHRD V1 **** D9D7L0_MALDO); contains Interpro domain(s) IPR001764 Glycoside hydrolase, family 3, N-terminal "	-1.39047	-1.82383	3.42254	3.11457
Solyc01g104980.2.1	0.0169908	27.5	25	0.212832	17.41	18.84	0.150283	17.72	23.08	0.261574	16.32	19.85	"Kelch-like protein 14 (AHRD V1 ***- B6T7I5_MAIZE); contains Interpro domain(s) IPR015915 Kelch-type beta propeller "	2.44316	1.6365	1.73289	1.49969
Solyc01g105030.2.1	1	1.38	2.15	0.792745	0.82	5.52	0.0426608	5.03	9.63	0.0496185	7.43	6.75	"Chlorophyll a-b binding protein, chloroplastic (AHRD V1 **** CB12_PETHY); contains Interpro domain(s) IPR001344 Chlorophyll A-B binding protein "	-1.13435	1.50339	3.17658	2.99283
Solyc01g105050.2.1	1	0.77	0.42	1	0.28	0	0.0394117	3.7	5.08	0.0393201	3.96	4.86	"Chlorophyll a-b binding protein, chloroplastic (AHRD V1 **** CB12_PETHY); contains Interpro domain(s) IPR001344 Chlorophyll A-B binding protein "	1.4795	-1.85337	8.55392	8.40136
Solyc01g105070.2.1	0.351145	74.07	53.92	0.390742	69.68	60.99	7.35e-06	278.66	278.4	7.67e-06	208.78	243.1	"Peroxidase (AHRD V1 **** Q43499_SOLLC); contains Interpro domain(s) IPR002016 Haem peroxidase, plant/fungal/bacterial "	1.38432	1.35857	5.45871	4.31475
Solyc01g105080.2.1	2.46e-17	83.92	85.34	6.96e-08	13.89	28.16	1	0.91	0.54	0.250229	2.06	1.7	Receptor like kinase, RLK	462.15	113.632	4.41153	10.174
Solyc01g105150.2.1	0.0808368	11.67	12.71	0.149073	13.88	13.19	0.0680652	14.61	11.37	0.0468553	13.91	13.02	"Potassium transporter family protein (AHRD V1 ***- D7KXB7_ARALY); contains Interpro domain(s) IPR003855 K+ potassium transporter "	-1.92206	-1.78684	-1.97131	-1.95728
Solyc01g105220.2.1	0.759763	5.66	7.85	0.211747	6.37	1.16	0.0614312	4.04	2.56	0.0115906	2.11	2.24	"Alternative oxidase (AHRD V1 **** B2CKL9_VITVI); contains Interpro domain(s) IPR002680 Alternative oxidase "	-1.22135	-2.24379	-2.66606	-4.06884
Solyc01g105230.2.1	0.00732	12.72	13.68	0.152904	24.65	18.73	0.206241	26.14	22.58	0.113668	24.2	22.55	"Calmodulin-binding transcription activator 2 (AHRD V1 **** Q0WNN4_ARATH); contains Interpro domain(s) IPR005559 CG-1 "	-2.72332	-1.72007	-1.62049	-1.73784
Solyc01g105280.2.1	0.0544125	63.34	56.6	0.124555	80.35	59.92	0.0177852	56.47	49.26	0.0064	51.57	56.94	"Protein phosphatase 2C-like (AHRD V1 ***- A2Q6E4_MEDTR); contains Interpro domain(s) IPR015655 Protein phosphatase 2C "	-1.92741	-1.71119	-2.39725	-2.40179
Solyc01g105370.2.1	0.00992	25.65	32.57	0.000428	16.5	20.87	0.0255233	30.95	37.78	0.000122	23.15	18.75	"Enoyl-(Acyl-carrier-protein) reductase II (AHRD V1 **-- C7IPB6_THEET); contains Interpro domain(s) IPR004136 2-nitropropane dioxygenase, NPD "	-2.51261	-4.00704	-2.32613	-3.91587
Solyc01g105410.2.1	0.0624342	200.46	123.68	0.0311973	161.63	149.58	0.050051	157.95	182.53	0.0110104	132.36	178.19	"Os06g0220000 protein (Fragment) (AHRD V1 ***- Q0DDJ2_ORYSJ); contains Interpro domain(s) IPR006766 Phosphate-induced protein 1 conserved region "	-1.9361	-2.10486	-2.04225	-2.29176
Solyc01g105420.2.1	0.00254	63.6	54.51	0.136879	33.07	39.3	0.260298	13.01	13.88	0.224497	13.38	13.92	"Phospho-2-dehydro-3-deoxyheptonate aldolase 2 (AHRD V1 ***- B6UAK5_MAIZE); contains Interpro domain(s) IPR002480 DAHP synthetase, class II "	3.07666	1.82573	-1.55465	-1.57256
Solyc01g105520.2.1	1	0.3	0.28	0.634617	1.29	1.52	0.00123	6.11	8.37	0.00348	6.63	6.44	"DNA replication licensing factor (AHRD V1 **** Q8JGR5_DANRE); contains Interpro domain(s) IPR001208 DNA-dependent ATPase MCM "	-1.57028	2.26204	10.2937	9.08307
Solyc01g105540.2.1	0.0228902	25.11	27.74	0.2252	17.68	18.74	0.750147	14.48	12.24	0.269352	16.1	20.04	"2-oxoglutarate/malate translocator (AHRD V1 **-- Q9FMF7_ARATH); contains Interpro domain(s) IPR001898 Sodium/sulphate symporter "	2.5239	1.69399	1.17318	1.53794
Solyc01g105560.2.1	0.0162209	51.83	39.7	0.106696	77.66	44.08	0.141251	62.24	74.26	0.00427	49.65	46.1	"3 4-dihydroxy-2-butanone 4-phosphate synthase (AHRD V1 ***- D7CLR6_SYNLT); contains Interpro domain(s) IPR000422 DHBP synthase RibB "	-2.28365	-1.79292	-1.68936	-2.47229
Solyc01g105600.2.1	0.00013	15.68	14.07	0.0516643	4.16	12.8	0.390434	2.96	5.13	1	2.95	2.87	Unknown Protein (AHRD V1)	7.98372	4.47295	2.0353	1.44309
Solyc01g105610.1.1	1.37e-08	18.87	23.22	0.0155364	3.78	7.78	1	0.81	0	1	0.71	0.6	"RING finger protein (AHRD V1 *-*- C6EUD3_SOYBN); contains Interpro domain(s) IPR018957 Zinc finger, C3HC4 RING-type "	52.3357	14.3027	1.23889	1.77711
Solyc01g105630.2.1	0.011198	14.25	22.14	0.0663409	22.66	25.65	0.000322	13.76	9.06	0.000299	16.15	11.42	"Calmodulin (AHRD V1 ***- Q39890_SOYBN); contains Interpro domain(s) IPR011992 EF-Hand type "	-2.62676	-2.03116	-4.5302	-3.87648
Solyc01g105660.2.1	0.757041	14.4	4.72	0.00239	32.24	35	0.0406498	2	1.79	0.0527534	3.6	1.38	"1-aminocyclopropane-1-carboxylate oxidase (AHRD V1 **-- ACCO_TOBAC); contains Interpro domain(s) IPR005123 Oxoglutarate and iron-dependent oxygenase "	1.26211	4.21972	-4.19819	-3.33082
Solyc01g105670.2.1	0.130806	12.08	11	0.11424	11.79	14.1	0.049588	15.3	13.35	0.0110084	16.82	16.2	"Calcium-dependent protein kinase (AHRD V1 **** B6UA37_MAIZE); contains Interpro domain(s) IPR002290 Serine/threonine protein kinase "	1.94075	2.11013	2.19847	2.45985
Solyc01g105680.2.1	0.370087	6.66	3.65	0.0098	12	11.12	5.48e-06	21.47	33.59	6.34e-06	20.28	24.13	"Phototropic-responsive NPH3 family protein (AHRD V1 **-- D7KEU3_ARALY); contains Interpro domain(s) IPR004249 NPH3 "	1.9595	4.1898	9.34479	7.39134
Solyc01g105690.2.1	0.592295	16.1	12.69	0.260686	16.49	22.33	0.0492527	21.61	33.87	0.0627752	26.38	23.74	"Transcription factor/ transcription regulator (AHRD V1 **** D7M240_ARALY); contains Interpro domain(s) IPR001092 Basic helix-loop-helix dimerisation region bHLH "	1.26054	1.64173	2.19718	1.93838
Solyc01g105700.2.1	0.59243	8.63	5.2	0.213128	10.38	9.07	0.0321482	12.78	13.82	0.0225354	13.14	15.74	Unknown Protein (AHRD V1)	1.38124	1.86782	2.40174	2.5357
Solyc01g105750.1.1	1	0	0	0.021441	4.71	2.94	1	0.13	0	1	0.61	0	Unknown Protein (AHRD V1)	1	30.2286	1.47097	3.25087
Solyc01g105770.2.1	0.0795099	12.43	29.7	0.000103	211.76	25.27	3.63e-05	60.73	61.29	1.43e-05	57.63	55.7	Unknown Protein (AHRD V1)	2.26897	12.1553	6.05015	5.47554
Solyc01g105880.2.1	0.494942	11	4.95	0.740148	4.42	3.86	0.0160636	17.55	17.35	0.00939	19.23	16.96	"(E)-beta-ocimene synthase (AHRD V1 **** Q5CD81_CITUN); contains Interpro domain(s) IPR005630 Terpene synthase, metal-binding domain "	1.50982	-1.31089	2.98726	3.01931
Solyc01g105920.2.1	3.41e-05	0	0	0.00106	1.84	0	0.0325662	2.77	7.06	0.290069	9.49	11.16	"(E)-beta-ocimene synthase (AHRD V1 **** Q5CD81_CITUN); contains Interpro domain(s) IPR005630 Terpene synthase, metal-binding domain "	-126.913	-16.1293	-3.54865	-1.74776
Solyc01g105960.2.1	0.00053	1.63	2.21	0.00499	4.99	2.27	0.868707	11.76	26.9	0.636282	23.74	30.82	"(E)-beta-ocimene synthase (AHRD V1 **** Q5CD81_CITUN); contains Interpro domain(s) IPR001906 Terpene synthase-like "	-9.62992	-5.42924	-1.11365	1.24182
Solyc01g106000.2.1	0.034842	144.88	117.48	0.0704587	119.89	125.57	0.8967	67.56	55.38	0.945225	66.69	70.5	"Isochorismatase hydrolase (AHRD V1 ***- B6TNR9_MAIZE); contains Interpro domain(s) IPR000868 Isochorismatase-like "	2.22043	2.00414	-1.05488	1.02814
Solyc01g106060.2.1	7.28e-08	13.35	19.9	0.00087	53.08	15.16	0.000576	37.49	44.92	0.000416	43.8	51.91	"Glutamine amidotransferase class-I (AHRD V1 **-- A2Q1P2_MEDTR); contains Interpro domain(s) IPR000991 Glutamine amidotransferase class-I, C-terminal "	-8.89058	-4.51834	-3.93002	-3.4699
Solyc01g106090.2.1	1	1.28	0.26	0.703149	1.82	2.85	0.0396492	4.89	5.41	0.0227171	6.17	5.26	"Photosystem II oxygen evolving complex protein PsbP (AHRD V1 *-*- B8HJK6_CYAP4); contains Interpro domain(s) IPR002683 Photosystem II oxygen evolving complex protein PsbP "	-1.28971	2.06332	4.16616	4.49677
Solyc01g106160.1.1	1e-05	8.7	11.64	0.0215701	3.02	4.55	1	0.00872	0	1	0.51	0.08	"Receptor protein kinase-like protein (AHRD V1 *-*- Q9LSL5_ARATH); contains Interpro domain(s) IPR002290 Serine/threonine protein kinase "	43.5471	16.2506	-1.81663	1.66486
Solyc01g106200.1.1	0.713651	0.14	1.51	0.730246	2.01	0	0.023616	4.36	14.94	0.0813625	8.37	4.68	"Oligopeptide transporter 4 (AHRD V1 ***- B6U8Q5_MAIZE); contains Interpro domain(s) IPR004813 Oligopeptide transporter OPT superfamily "	-2.29255	-1.97657	4.08529	2.70137
Solyc01g106210.2.1	0.0307666	30.36	46.15	0.154714	58.67	40.74	0.539016	77.8	62.16	0.773574	81.18	83.49	"Chaperone DnaK (AHRD V1 ***- A2Q199_MEDTR); contains Interpro domain(s) IPR012725 Chaperone DnaK "	-2.11068	-1.67271	-1.25467	-1.09826
Solyc01g106290.2.1	0.0302747	76.46	54.65	0.0952361	58.9	52.92	0.870666	38.91	13.01	0.216312	11.41	23.76	Unknown Protein (AHRD V1)	2.48426	2.03677	-1.11052	-1.68163
Solyc01g106310.2.1	0.14192	35.64	16.78	0.355868	15.13	28.01	0.371401	11.17	10.65	0.0444155	5.84	9.06	Unknown Protein (AHRD V1)	1.85576	1.47184	-1.42001	-2.12137
Solyc01g106350.2.1	0.00794	14.13	13.62	0.302795	5.88	10.1	0.407646	7.9	6.52	0.31152	9.41	7.26	"Glutamyl-tRNA(Gln) amidotransferase subunit A (AHRD V1 ***- C5FFK2_NANOT); contains Interpro domain(s) IPR000120 Amidase signature enzyme "	3.3371	1.87791	1.60152	1.79799
Solyc01g106360.2.1	0.00609	19.59	20.56	0.427745	9.64	12.43	0.20612	13.15	12.2	0.112291	13.22	14.93	"Glutamyl-tRNA(Gln) amidotransferase subunit A (AHRD V1 ***- C5FFK2_NANOT); contains Interpro domain(s) IPR000120 Amidase signature enzyme "	2.8858	1.54976	1.67175	1.80296
Solyc01g106390.2.1	0.186861	96.42	75.42	0.609228	59.32	71.71	0.0902508	34.9	17.75	0.00302	21.12	14.53	"Glutamyl-tRNA reductase (AHRD V1 ***- A5BZY3_VITVI); contains Interpro domain(s) IPR000343 Tetrapyrrole biosynthesis, glutamyl-tRNA reductase "	1.67923	1.23695	-2.12337	-3.23803
Solyc01g106460.2.1	1.41e-10	0.82	1.05	5.92e-05	10.21	1.3	0.0442309	25.42	15.39	0.349047	32.46	36.57	"Transcription factor (AHRD V1 **** Q9M4A8_MAIZE); contains Interpro domain(s) IPR011598 Helix-loop-helix DNA-binding "	-40.5117	-7.58733	-2.27984	-1.39123
Solyc01g106500.2.1	0.000802	5.27	4.8	0.0558165	13.99	5.43	0.598092	18.22	18.12	0.351846	18.77	15.78	LRR receptor-like serine/threonine-protein kinase, RLP	-4.05439	-2.20955	-1.25302	-1.35507
Solyc01g106510.2.1	6.79e-05	1.01	0.21	0.000138	0.41	0.45	0.79487	12.28	8.07	0.0369086	6.03	3.72	"F-box protein family-like (AHRD V1 ***- Q6ZCS3_ORYSJ); contains Interpro domain(s) IPR005174 Protein of unknown function DUF295 "	-14.8478	-20.139	-1.16006	-2.46181
Solyc01g106520.1.1	0.0198198	0.23	0.28	0.0223556	0.28	0	0.346077	0.95	1.9	0.180288	0.83	1.14	"Unknown Protein (AHRD V1); contains Interpro domain(s) IPR005174 Protein of unknown function DUF295 "	-9.32625	-13.6378	-2.51911	-3.59987
Solyc01g106540.2.1	0.098845	0.11	0.98	0.678117	3.3	2.43	0.133234	11.32	10.23	0.0344754	14.15	12.41	Unknown Protein (AHRD V1)	-6.67527	-1.54551	2.20268	2.62382
Solyc01g106590.2.1	0.36513	3.4	4.09	0.743573	3.21	1.78	0.0058	7.93	8.81	0.0077	8.18	8.26	"Leaf senescence protein-like (AHRD V1 **-- Q8H2I6_ORYSJ); contains Interpro domain(s) IPR004253 Protein of unknown function DUF231, plant "	2.40733	1.58521	4.84365	4.6287
Solyc01g106610.2.1	0.0199677	5.47	25.01	0.0365512	21.09	22.2	0.253758	42.34	56.16	0.166275	38.92	47.69	"Pathogenesis-related protein-1 (AHRD V1 **-- Q40397_NICGU); contains Interpro domain(s) IPR002413 Ves allergen "	-7.02888	-4.99355	-2.34379	-2.72694
Solyc01g106620.2.1	0.192055	3.58	8.75	0.00174	2.18	1.47	0.727369	8.5	13.51	0.121781	9.62	3.97	"Pathogenesis-related protein 1a (AHRD V1 **-- Q00MX6_MALDO); contains Interpro domain(s) IPR018244 Allergen V5/Tpx-1 related, conserved site "	-1.90124	-6.27675	-1.17086	-1.93738
Solyc01g106630.2.1	0.229637	4.97	7.76	0.00356	2.69	0.74	0.200978	17.37	24.84	1	16.33	10.41	Unknown Protein (AHRD V1)	-1.75728	-6.36399	1.70339	1.0505
Solyc01g106640.2.1	0.0520157	0	7	0.00357	5.73	4.36	0.500207	0.19	1.44	0.125229	2.84	1.7	"Pathogenesis-related protein 1 (AHRD V1 ***- D2XZ57_9ROSI); contains Interpro domain(s) IPR002413 Ves allergen "	27.5529	39.5852	7.06892	17.6897
Solyc01g106690.2.1	0.144772	114.15	62.67	0.0323435	118.74	115.42	0.632288	62.68	25.2	0.366835	38.43	42.77	"Unknown Protein (AHRD V1); contains Interpro domain(s) IPR010410 Protein of unknown function DUF1005 "	1.78966	2.2674	-1.23663	-1.38194
Solyc01g106750.1.1	0.154774	0.14	0.58	0.830254	2.58	3.07	0.093414	9.65	9.88	0.0153449	14.47	10.32	Unknown Protein (AHRD V1)	-7.50167	-1.27157	2.45247	3.00632
Solyc01g106780.2.1	8.76e-06	17.19	29.83	0.0206062	12.85	7.66	0.0247099	9.21	9.14	0.0193685	8.17	10.64	"Pyruvate kinase (AHRD V1 **** B9GIN5_POPTR); contains Interpro domain(s) IPR001697 Pyruvate kinase "	9.42377	4.02776	3.43089	3.42636
Solyc01g106830.2.1	0.000313	35.88	33.71	0.0209532	26.5	19.77	0.000284	1.01	0	0.000158	1.18	0.41	"Phytosulfokines 4 (AHRD V1 *-*- B6UIM4_MAIZE); contains Interpro domain(s) IPR009438 Phytosulfokine "	4.10147	2.63841	-14.5199	-10.2734
Solyc01g106910.2.1	0.013682	0.12	0	0.426224	3.88	0.94	0.0665239	1.27	0.83	0.180655	2.75	2.05	Unknown Protein (AHRD V1)	-31.6008	-2.42536	-5.49089	-2.65027
Solyc01g106920.2.1	0.00297	7.65	9.06	0.00694	7.73	7.97	0.000338	14.02	10.1	9.51e-06	15.23	15.33	"Nucleobase ascorbate transporter (AHRD V1 **-* B9HN10_POPTR); contains Interpro domain(s) IPR006043 Xanthine/uracil/vitamin C permease "	6.90119	6.3038	9.1285	11.2407
Solyc01g107010.2.1	0.0269023	4.33	5.06	0.454095	7.43	11.73	0.0270952	5.63	5.69	0.0112225	4.47	5.74	"DNA polymerase IV (AHRD V1 *-** D6RLC7_COPC7); contains Interpro domain(s) IPR001126 DNA-repair protein, UmuC-like "	-2.75565	-1.40871	-2.50523	-2.84266
Solyc01g107050.2.1	0.122082	12.38	21.24	0.561288	5.75	5.59	0.00189	30.4	35.85	0.00232	35.26	25.11	"N-hydroxycinnamoyl/benzoyltransferase 4 (AHRD V1 **-- Q00M86_SOYBN); contains Interpro domain(s) IPR003480 Transferase "	2.06698	-1.45158	3.72648	3.30626
Solyc01g107060.2.1	0.467077	8.65	14.93	0.444247	4.96	5.42	0.00329	28.48	31.87	0.0112738	28.39	21.33	Unknown Protein (AHRD V1)	1.40135	-1.64159	3.27115	2.62668
Solyc01g107080.2.1	0.0342123	5.72	7.3	0.0199989	6.28	5.66	0.134905	8.55	10.72	0.205853	13.39	9.76	"Hydroxycinnamoyl transferase (AHRD V1 **-* Q8GSM7_TOBAC); contains Interpro domain(s) IPR003480 Transferase "	-2.43739	-2.73437	-1.81044	-1.55307
Solyc01g107090.2.1	0.972659	189.03	126.8	0.550895	88.76	171.14	0.203932	124.8	87.28	0.00162	65.63	50.46	Beta-1 4-xylosidase (AHRD V1 *-*- D7LA14_ARALY)	-1.01319	-1.27232	-1.66143	-3.13425
Solyc01g107100.2.1	0.00412	177.32	137.9	0.00622	147.09	185.34	0.535403	256.7	494.28	0.0081	216.13	196.9	Beta-1 4-xylosidase (AHRD V1 ***- D7LA14_ARALY)	-2.75007	-2.69978	-1.27921	-2.37971
Solyc01g107170.2.1	0.00106	308.65	202.68	0.00458	163.35	318.48	0.289427	73.28	14.96	0.00418	31.03	23.51	"Zinc finger protein (AHRD V1 ***- A0T3Q5_SOLTU); contains Interpro domain(s) IPR007087 Zinc finger, C2H2-type "	3.6536	3.32958	-1.73162	-2.90951
Solyc01g107180.2.1	0.0403002	7.19	8.18	0.674084	14.37	15.7	0.93903	17.95	22.88	0.645043	24.99	23.23	"Phototropic-responsive NPH3 family protein (AHRD V1 **-- D7M5U6_ARALY); contains Interpro domain(s) IPR004249 NPH3 "	-2.28488	-1.21385	1.05066	1.20709
Solyc01g107190.2.1	0.142308	5.27	12.19	0.741879	15.39	26.21	0.00163	3.56	5.18	0.455402	17.83	35.29	"LOB domain protein 38 (AHRD V1 *-*- D7LT02_ARALY); contains Interpro domain(s) IPR004883 Lateral organ boundaries, LOB "	-1.9662	1.17807	-4.19673	1.37983
Solyc01g107200.2.1	7.6e-05	19.25	20.24	0.0388239	8.71	12.02	0.142468	7.23	8.27	0.0124971	12.44	9.64	"Os02g0794300 protein (Fragment) (AHRD V1 *-*- Q0DWU9_ORYSJ); contains Interpro domain(s) IPR007573 Protein of unknown function DUF566 "	6.3078	3.24709	2.28601	3.14599
Solyc01g107250.2.1	0.0435578	15.35	18.85	0.106963	27.09	10.84	0.87869	40.34	34.52	0.694952	39.6	31.47	LRR receptor-like serine/threonine-protein kinase, RLP	-2.11574	-1.98063	-1.05904	-1.14962
Solyc01g107290.2.1	0.00075	96.15	35.57	2.86e-05	66.86	103.5	0.118099	43.54	19.36	0.230662	25.61	24.8	"RING-H2 finger protein (AHRD V1 ***- Q8LJR8_SOYBN); contains Interpro domain(s) IPR001841 Zinc finger, RING-type "	4.61233	5.70257	1.99139	1.5493
Solyc01g107310.2.1	0.354031	34.85	21.88	0.976839	43.35	47.32	0.0264323	21.93	12.18	0.00877	20.3	13.4	"Phosphatase 2C family protein (AHRD V1 ***- D7MFT9_ARALY); contains Interpro domain(s) IPR015655 Protein phosphatase 2C "	-1.49382	1.02759	-2.72481	-2.8521
Solyc01g107340.2.1	0.0427183	4.92	12.42	0.388972	40.37	27.42	0.0706261	66.51	41.49	0.0993466	42.49	53.88	Unknown Protein (AHRD V1)	-2.5637	1.47208	2.22513	1.92644
Solyc01g107350.2.1	0.00764	23.89	18.2	0.0449616	16.04	18.15	0.0106185	29.52	16.73	0.00141	23.82	27.13	"Os12g0581300 protein (Fragment) (AHRD V1 *-*- Q0IMB2_ORYSJ); contains Interpro domain(s) IPR006873 Protein of unknown function DUF620 "	2.96415	2.33027	2.97447	3.18115
Solyc01g107390.2.1	1.54e-05	289.64	225.19	0.000733	156.63	251.57	0.000177	17.27	6.86	0.000563	22.51	14.21	"Auxin-responsive GH3 product (AHRD V1 ***- Q05680_SOYBN); contains Interpro domain(s) IPR004993 GH3 auxin-responsive promoter "	4.68799	3.60021	-4.93819	-3.37397
Solyc01g107400.2.1	0.734944	1.53	1.28	0.330041	2.42	0	5.33e-07	30.28	29.17	3.3e-06	21.85	22.31	Indole-3-acetic acid-amido synthetase GH3.8 (AHRD V1 ***- B6U4E2_MAIZE)	-1.93621	-2.28615	9.20241	6.65579
Solyc01g107510.2.1	0.112428	20.62	16.68	0.0570332	18.45	14.67	0.0319718	16.14	15.29	0.0340534	16.24	18.84	"DNA polymerase IV (AHRD V1 **** C1GRH3_PARBA); contains Interpro domain(s) IPR012112 DNA repair protein, Rev1 "	-1.86225	-2.1742	-2.42389	-2.23137
Solyc01g107560.2.1	0.000893	25.74	26.55	0.0735577	13.24	18.67	0.180653	14.14	13.66	0.240821	11.75	14.29	"UDP-glucosyltransferase 1 (AHRD V1 **** C6ZRH7_CAPAN); contains Interpro domain(s) IPR002213 UDP-glucuronosyl/UDP-glucosyltransferase "	3.60673	2.14584	1.75978	1.60379
Solyc01g107590.2.1	0.0419417	339.11	491.18	0.416636	291.7	252.9	0.247102	132.22	136.98	0.0961116	124.19	119.99	"Cinnamyl alcohol dehydrogenase (AHRD V1 **** C1IC55_GOSHI); contains Interpro domain(s) IPR002085 Alcohol dehydrogenase superfamily, zinc-containing "	2.12218	1.35637	-1.57964	-1.79023
Solyc01g107610.2.1	0.115838	15.13	13.23	0.0152379	14.8	3.52	0.429948	20.24	21.5	0.199566	20.59	16.32	"PRKR interacting protein 1 (AHRD V1 *-*- B6TNU4_MAIZE); contains Interpro domain(s) IPR009548 Protein of unknown function DUF1168 "	-1.81855	-2.91928	-1.35898	-1.57986
Solyc01g107660.2.1	0.0391653	12.28	17.03	0.380911	11.05	7.98	0.861122	7.03	8.37	1	7.24	5.66	Stress enhanced protein 1 (Fragment) (AHRD V1 *-*- C6JT32_9MYRT)	2.55104	1.61303	1.24169	1.01732
Solyc01g107710.2.1	0.0214159	0	3.09	0.65946	12.9	28.44	0.000525	0.1	0.06	0.0308448	1.24	3.74	"Root cap protein 3 (Fragment) (AHRD V1 ***- Q1HVA8_MESVI); contains Interpro domain(s) IPR009646 Root cap "	-9.13143	1.35363	-76.4346	-6.39513
Solyc01g107720.2.1	0.0978761	0	3.86	0.23976	17.72	29.2	0.00177	0.31	0.05	0.0789463	1.34	4.09	"Root cap protein 3 (Fragment) (AHRD V1 ***- Q1HVA8_MESVI); contains Interpro domain(s) IPR009646 Root cap "	-5.36391	2.11617	-37.2582	-4.25771
Solyc01g107730.2.1	0.630314	1.19	2.19	0.0690655	7.44	2.9	4.45e-06	20.46	12.75	1.67e-08	18.43	35.55	"Cyclin (AHRD V1 ***- Q1XGF1_TOBAC); contains Interpro domain(s) IPR006671 Cyclin, N-terminal "	2.08825	5.89856	17.7428	28.1024
Solyc01g107780.2.1	0.000387	7.36	11.89	0.000133	9.83	4.93	0.0378134	23.01	15.89	0.00156	18.6	7.18	"UDP-glucosyltransferase family 1 protein (AHRD V1 **** C6KI43_CITSI); contains Interpro domain(s) IPR002213 UDP-glucuronosyl/UDP-glucosyltransferase "	-4.36875	-5.84225	-2.36357	-3.68482
Solyc01g107790.2.1	3.18e-05	3.7	3.34	0.000182	4.5	4.31	2.87e-05	6.49	1.84	0.000949	3.98	10.4	LRR receptor-like serine/threonine-protein kinase, RLP	-6.09736	-5.06755	-5.65261	-3.40829
Solyc01g107820.2.1	2.33e-05	108.51	96.6	0.000354	137.17	121.21	0.000199	132.46	98.95	1.97e-07	102.36	62.38	"UDP-glucosyltransferase family 1 protein (AHRD V1 **** C6KI43_CITSI); contains Interpro domain(s) IPR002213 UDP-glucuronosyl/UDP-glucosyltransferase "	-4.19389	-3.4516	-4.07311	-5.92396
Solyc01g107860.2.1	0.000171	18.29	15.92	0.0165136	36.18	21.71	0.00711	32.9	19.7	0.00118	25.17	26.88	"CBS domain-containing protein-like (AHRD V1 ***- B8AP73_ORYSI); contains Interpro domain(s) IPR000644 Cystathionine beta-synthase, core "	-4.07615	-2.51097	-2.90668	-3.02758
Solyc01g107890.2.1	0.119981	9.47	12.03	0.428167	10.89	6.41	4.12e-06	39.15	56.7	8.73e-07	45.2	38.65	"Filament-like plant protein (Fragment) (AHRD V1 *-*- FPP_SOLLC); contains Interpro domain(s) IPR008587 Protein of unknown function DUF869, plant "	2.03218	1.58512	8.18024	6.98607
Solyc01g107900.2.1	0.0471372	59.24	48.08	0.774002	29.03	31.43	0.376437	17.31	22.84	0.140326	16.58	17.51	"Acyltransferase WS/DGAT/MGAT family protein (AHRD V1 **-- A7NLM3_ROSCS); contains Interpro domain(s) IPR009721 Protein of unknown function DUF1298 "	2.07698	1.13161	-1.41123	-1.70158
Solyc01g107910.2.1	0.160568	298.63	463.3	0.00309	240.95	191.61	0.00755	212.28	271.85	0.000681	235.12	206.71	"Caffeoyl CoA 3-O-methyltransferase (AHRD V1 **** Q5I2D1_9ROSI); contains Interpro domain(s) IPR002935 O-methyltransferase, family 3 "	-1.6423	-2.96725	-2.81171	-3.16513
Solyc01g107920.2.1	0.108431	3.22	3.13	0.00647	1.5	1.01	0.00185	1.04	1.73	0.00135	1.26	1.61	Os07g0175100 protein (Fragment) (AHRD V1 ***- Q0D898_ORYSJ)	-2.41143	-5.93276	-5.72796	-5.67656
Solyc01g107930.2.1	0.908661	11.55	11.73	0.575213	10.34	10.22	0.131754	7.6	7.15	0.0358715	6.81	6.52	"RING-finger protein like (AHRD V1 *-*- B6SVN2_MAIZE); contains Interpro domain(s) IPR018957 Zinc finger, C3HC4 RING-type "	-1.11625	-1.3026	-1.91379	-2.17139
Solyc01g107980.2.1	0.0367482	13.58	10.52	0.315004	9.96	7.15	0.0948003	15.06	8.36	0.195679	9.47	10.22	"U-box domain-containing protein (AHRD V1 ***- A8IXJ0_BRACM); contains Interpro domain(s) IPR011989 Armadillo-like helical "	2.51521	1.73177	2.23602	1.83367
Solyc01g108060.1.1	1	0	0	0.0204896	0	12.16	1	0.12	0.45	1	0	0.59	"Propionyl-CoA carboxylase (AHRD V1 ***- A4ENA2_9RHOB); contains Interpro domain(s) IPR000022 Carboxyl transferase "	1	48.4578	3.0991	3.16805
Solyc01g108080.2.1	0.00202	31.12	29.36	0.0114428	20.8	38.6	0.227598	19.44	13.53	0.432123	14.97	13.34	"BZIP transcription factor (AHRD V1 **-* Q0PN11_9FABA); contains Interpro domain(s) IPR011616 bZIP transcription factor, bZIP-1 "	3.24121	3.09572	1.62284	1.35716
Solyc01g108100.2.1	0.847108	6.44	5.9	0.00863	14.67	19.41	0.855221	4.16	10.21	0.4819	4.42	3.5	Unknown Protein (AHRD V1)	1.17178	3.10302	1.24303	-1.47721
Solyc01g108120.2.1	1	16.73	13.53	1	11.63	17.28	0.0885724	7.24	8.36	0.0246736	7.79	5.75	"B3 domain-containing protein At3g19184 (AHRD V1 *-*- Y3918_ARATH); contains Interpro domain(s) IPR003340 Transcriptional factor B3 "	1.04187	-1.03679	-2.0244	-2.38874
Solyc01g108210.2.1	1.06e-05	1.9	1.13	0.161466	16.27	6.69	0.000136	5.27	1.82	0.000455	4.27	5.56	Cytochrome P450	-13.3088	-1.95582	-6.48055	-4.85191
Solyc01g108220.2.1	1.4e-06	0	0	3.53e-06	0	0	2.41e-05	0.75	1.73	1.63e-06	1.63	0	Unknown Protein (AHRD V1)	-125.725	-127.889	-12.8999	-19.1241
Solyc01g108230.2.1	0.0291491	10.52	15.18	0.187933	20.7	15.15	0.148665	17.82	19.11	0.282967	23.93	20.58	"LAG1 longevity assurance homolog 2 (AHRD V1 **-- C1BLI2_OSMMO); contains Interpro domain(s) IPR006634 TRAM, LAG1 and CLN8 homology "	-2.25581	-1.67071	-1.71709	-1.46722
Solyc01g108240.2.1	0.286028	300.95	146.49	0.0865904	265.09	334.96	0.0265346	66.27	4	1.53e-05	30.66	16.51	"Ethylene responsive transcription factor 2b (AHRD V1 *-*- C0J9I6_9ROSA); contains Interpro domain(s) IPR001471 Pathogenesis-related transcriptional factor and ERF, DNA-binding "	1.59914	2.05207	-4.35236	-6.78265
Solyc01g108250.2.1	0.714409	79.24	61.84	0.793937	75.94	76.38	0.0911419	56.87	32.43	0.0103295	39.75	34.17	"Vacuolar import and degradation protein VID27 (AHRD V1 *--- B3LP56_YEAS1); contains Interpro domain(s) IPR013863 Vacuolar import and degradation, Vid27-related "	-1.15647	-1.11142	-2.0011	-2.49656
Solyc01g108300.2.1	1	2.75	4.31	0.0479663	12.15	7.58	0.0246584	8.81	11.02	0.0055	10.24	13.12	"Myb family transcription factor (AHRD V1 **-- D7LQI3_ARALY); contains Interpro domain(s) IPR006447 Myb-like DNA-binding region, SHAQKYF class "	1.16708	3.09801	2.93516	3.35555
Solyc01g108320.2.1	8.28e-08	124.32	128.27	0.0415611	25.17	58.12	0.000429	3.68	3.72	0.00769	3.91	9.66	"Peroxidase (AHRD V1 ***- Q43004_ORYSJ); contains Interpro domain(s) IPR002016 Haem peroxidase, plant/fungal/bacterial "	7.53579	2.43164	-4.78428	-2.71893
Solyc01g108340.2.1	5.25e-05	27.78	47.6	0.0116646	19.69	22.32	0.0200508	21.79	17.92	0.000612	27.67	27.95	"Peptidyl-prolyl cis-trans isomerase D (AHRD V1 **** PPID_RAT); contains Interpro domain(s) IPR002130 Peptidyl-prolyl cis-trans isomerase, cyclophilin-type "	5.07212	2.77295	2.47288	3.36045
Solyc01g108350.2.1	5.27e-14	0.21	1.18	3.32e-13	1.57	0	5.84e-09	1.16	7.11	1.94e-11	1.16	5.34	"Copper ion binding protein (AHRD V1 **-- B6TG98_MAIZE); contains Interpro domain(s) IPR008972 Cupredoxin "	-85.1862	-79.3225	-18.1151	-23.2674
Solyc01g108360.2.1	1.51e-11	0.66	2.4	6.06e-11	2.31	0.75	1.86e-09	2.66	3.96	1.32e-11	2.42	3.56	"Copper ion binding protein (AHRD V1 **-- B6TG98_MAIZE); contains Interpro domain(s) IPR008972 Cupredoxin "	-34.8087	-35.816	-18.2783	-20.6809
Solyc01g108390.2.1	0.00357	0.2	2.18	0.130274	5.79	3.16	0.917059	6.36	17.12	0.826832	17.65	8.46	"Proteinase inhibitor (AHRD V1 ***- D6BR63_9ROSI); contains Interpro domain(s) IPR000864 Proteinase inhibitor I13, potato inhibitor I "	-7.73421	-2.27409	1.06744	1.15721
Solyc01g108400.2.1	0.00647	14.97	22.89	0.00484	17.15	18.77	0.136179	34.47	31.42	0.0692092	32.12	31.83	"Calcium-dependent protein kinase-like (AHRD V1 **** Q9LET1_ARATH); contains Interpro domain(s) IPR002290 Serine/threonine protein kinase "	-2.8619	-3.09139	-1.79384	-1.90046
Solyc01g108440.2.1	3.88e-07	4.41	7.5	6.75e-06	10.28	4.6	0.000341	10.54	16.63	2.97e-05	13.52	12.32	"Calmodulin-binding protein (AHRD V1 **-* D7L4F9_ARALY); contains Interpro domain(s) IPR012442 Protein of unknown function DUF1645 "	-9.55097	-7.92267	-4.62779	-4.98872
Solyc01g108460.1.1	6.96e-15	62.06	56.65	1.97e-07	13.72	20.06	1	0.06	0	0.500152	1.17	0.98	"Serine carboxypeptidase 1 (AHRD V1 *-** B6SW38_MAIZE); contains Interpro domain(s) IPR001563 Peptidase S10, serine carboxypeptidase "	357.434	100.382	-1.05692	6.78773
Solyc01g108470.1.1	3.64e-22	206.15	218.07	4.37e-12	46.29	74.16	1	0.05	0.05	0.0393201	5.2	3.21	"Serine carboxypeptidase 1 (AHRD V1 **** B6SW38_MAIZE); contains Interpro domain(s) IPR001563 Peptidase S10, serine carboxypeptidase "	387.47	107.771	-3.21073	7.12944
Solyc01g108480.1.1	2.02e-09	25.64	30.81	0.00288	6.58	11.69	0.500207	0.09	0	1	0.49	0.58	"Serine carboxypeptidase 1 (AHRD V1 **** B6SW38_MAIZE); contains Interpro domain(s) IPR001563 Peptidase S10, serine carboxypeptidase "	27.9502	8.91363	-6.07055	-1.68855
Solyc01g108530.2.1	1.83e-06	55.25	55.1	0.00434	23.15	30.87	0.4992	5.99	3.46	0.650704	10.18	9.81	"Acetyl esterase (AHRD V1 *--- AES_SALPB); contains Interpro domain(s) IPR013094 Alpha/beta hydrolase fold-3 "	7.76536	3.70216	-1.60456	1.25629
Solyc01g108540.2.1	8.49e-08	18.25	25.27	0.0035	6.27	12.85	0.687887	2.17	2.16	0.453625	2.16	3.13	"Acetyl esterase (AHRD V1 *--- AES_SHIFL); contains Interpro domain(s) IPR013094 Alpha/beta hydrolase fold-3 "	20.6232	8.92671	1.99627	2.353
Solyc01g108560.2.1	0.016069	3.97	5.95	0.156248	1.7	4.53	0.62531	1.38	1.57	1	0.81	1.53	"Acetyl esterase (AHRD V1 *--- AES_SHIFL); contains Interpro domain(s) IPR013094 Alpha/beta hydrolase fold-3 "	9.39158	5.86129	2.74737	2.17782
Solyc01g108610.2.1	1	0	2.52	0.0370401	4.73	6.46	0.687887	2.06	2.64	0.180288	4.64	2.54	"Cyclin-dependent kinase inhibitor 12 (AHRD V1 ***- Q6T2Z2_SOYBN); contains Interpro domain(s) IPR016701 Cyclin-dependent kinase inhibitor, plant "	1.25158	5.03461	2.06089	3.01398
Solyc01g108630.2.1	0.00652	0.08	0.81	0.471285	4.17	5.43	0.813455	2.02	12.49	0.140699	15.66	17.08	"Nitrite reductase (AHRD V1 ***- Q76KB0_TOBAC); contains Interpro domain(s) IPR006067 Nitrite and sulphite reductase 4Fe-4S region "	-13.7481	-1.63918	-1.1688	1.85581
Solyc01g108670.2.1	0.247533	0.26	1.4	1	4.59	1.53	0.000707	16.56	18.7	0.000603	18.32	17.81	"Kinesin-like protein (AHRD V1 *-*- Q75LL2_ORYSJ); contains Interpro domain(s) IPR001752 Kinesin, motor region "	-3.88493	-1.20807	4.32857	4.30662
Solyc01g108680.2.1	0.359182	0.21	33.53	0.158421	18.36	9.37	0.00729	6.39	1.22	0.221483	27.7	7.52	"Hydrolase alpha/beta fold family protein (AHRD V1 **-- D7LG04_ARALY); contains Interpro domain(s) IPR000073 Alpha/beta hydrolase fold-1 "	-2.47312	-3.00159	-11.1442	-2.595
Solyc01g108700.2.1	0.0097	3.59	7.79	0.00637	5.83	5.22	0.0317752	2.85	12.83	0.105564	15.65	8.45	Unknown Protein (AHRD V1)	-3.99733	-4.21617	-3.18914	-2.14364
Solyc01g108730.1.1	0.0112533	5.14	2.69	0.261857	0.89	1.95	1	0.22	0	1	0.41	0.21	Hydrolase alpha/beta fold family protein (AHRD V1 **-* D7LP51_ARALY)	16.941	6.35994	-1.03535	1.7143
Solyc01g108840.2.1	0.000253	21	18.78	0.00217	20.92	16.32	0.00269	24.57	12.96	0.000162	18.93	23.21	Receptor like kinase, RLK	4.59937	4.16398	3.97743	4.33545
Solyc01g108860.2.1	2.65e-11	635.68	873.32	1.03e-08	481.67	792.32	0.0878321	148.06	102.19	0.0228671	111.45	186.7	"1-aminocyclopropane-1-carboxylate oxidase (AHRD V1 **-- ACCO_MUSAC); contains Interpro domain(s) IPR005123 Oxoglutarate and iron-dependent oxygenase "	12.6075	10.4372	1.92834	2.24005
Solyc01g108910.2.1	0.00159	26.48	9.18	0.0447914	7.66	12.36	0.814739	2.57	6.98	0.285546	9.85	3.78	COSII_At2g15890 (Fragment) (AHRD V1 *-*- C0KFD9_9SOLN)	5.47996	2.96044	1.34621	1.85406
Solyc01g109070.2.1	0.0143858	17.08	19.57	0.150536	34.03	19.19	0.0516002	21.82	24.48	0.00313	19.67	15.24	"Diphthamide biosynthesis protein 3 (AHRD V1 ***- B6SIS6_MAIZE); contains Interpro domain(s) IPR007872 Zinc finger, DPH-type "	-2.4419	-1.7455	-2.11728	-2.88338
Solyc01g109090.2.1	0.444762	10.43	5.83	0.371175	8.24	7.06	0.0113297	4.7	2.81	0.798953	15.16	7.96	Unknown Protein (AHRD V1)	-1.42281	-1.5649	-3.32184	-1.13791
Solyc01g109100.2.1	0.0262487	0.99	2.42	0.0640561	3.92	0	0.0341975	1.14	3.06	0.12371	6.6	2.78	Unknown Protein (AHRD V1)	-6.43615	-5.8376	-5.77567	-2.75382
Solyc01g109110.2.1	0.00904	106.26	57.19	0.000375	115.87	118.24	1	50.76	12.27	0.645101	25.85	29.41	"Guanine nucleotide-binding protein alpha-1 subunit (AHRD V1 *-*- B6TWS6_MAIZE); contains Interpro domain(s) IPR001019 Guanine nucleotide binding protein (G-protein), alpha subunit "	2.80307	3.84219	-1.01435	-1.19645
Solyc01g109120.2.1	0.000127	7.03	4.19	0.0695858	17	10.18	0.000345	10.03	2.95	3.6e-05	8.71	4.94	"WD-40 repeat family protein (AHRD V1 **-- Q1EPE0_MUSAC); contains Interpro domain(s) IPR020472 G-protein beta WD-40 repeat, region "	-4.71398	-2.04646	-4.46899	-4.39118
Solyc01g109140.2.1	1.44e-12	9.57	22.62	1.01e-06	52.54	13.58	0.0403914	94.33	197.14	1.94e-05	99.55	60.99	Cytochrome P450	-18.4659	-9.32565	-2.23721	-4.1687
Solyc01g109210.2.1	0.0217204	12.87	9.46	0.417327	6.64	6.4	1	5.56	2.39	1	4.67	3.51	Unknown Protein (AHRD V1)	3.01014	1.71492	-1.00053	-1.00009
Solyc01g109250.2.1	0.162266	47.94	27.53	0.00712	52.84	77.96	0.106483	68.37	27.89	0.415507	32.89	33.57	TMV response-related protein (AHRD V1 **-- B6SLK0_MAIZE)	1.75211	2.9214	2.03148	1.36
Solyc01g109260.2.1	0.309024	5.26	11.4	0.486901	9.45	5.57	0.0430734	12.36	12.92	0.0431938	12.78	11.69	At2g16070/F7H1.9 (AHRD V1 ***- Q93ZL0_ARATH)	1.75496	1.54288	2.4349	2.29138
Solyc01g109300.2.1	0.00812	96.05	95.35	0.136089	68.93	65.99	0.824277	39.12	35.85	0.706829	37.1	37.77	"4-hydroxy-3-methylbut-2-enyl diphosphate reductase (AHRD V1 ***- A2TGW4_9LAMI); contains Interpro domain(s) IPR003451 LytB protein "	2.51818	1.7188	-1.10786	-1.14063
Solyc01g109330.2.1	1	0.62	1.57	1	2.56	0.38	0.0239499	6.38	7.38	0.0578953	6.25	5.72	"Cytochrome c biogenesis protein ccsB (AHRD V1 *-*- D8G1N6_9CYAN); contains Interpro domain(s) IPR007816 ResB-like "	-1.28499	-1.01212	4.10076	3.48681
Solyc01g109370.2.1	0.405647	0.4	0.72	0.450905	3.35	4.96	0.0264955	8.32	7.97	0.0319196	6.82	8.55	"1-acylglycerol-3-phosphate acyltransferase (AHRD V1 **** A2TF19_BRAJU); contains Interpro domain(s) IPR002123 Phospholipid/glycerol acyltransferase "	-3.02042	2.00526	3.63402	3.33416
Solyc01g109390.2.1	0.164013	0.11	7.09	0.565978	12.12	6.18	0.0783377	43.48	49.11	0.0308789	29.9	102.76	"PVR3-like protein (AHRD V1 ***- B6TVY8_MAIZE); contains Interpro domain(s) IPR013770 Plant lipid transfer protein and hydrophobic protein, helical "	-3.82411	-1.55502	3.04419	4.30004
Solyc01g109430.2.1	0.653537	6.17	8.3	1	4.35	6.24	0.105856	15.27	11.84	0.0142308	16.83	17.92	"PPPDE peptidase domain-containing protein 1 (AHRD V1 **-- PPDE1_XENLA); contains Interpro domain(s) IPR008580 Protein of unknown function DUF862, eukaryotic "	1.31008	-1.05901	2.2287	2.76069
Solyc01g109460.2.1	0.0941626	145.61	128.77	0.0684189	129.46	134.52	0.0109403	110.24	91.96	0.0216927	129.77	128.58	"Solute carrier family 2, facilitated glucose transporter member 3 (AHRD V1 ***- GTR3_RAT); contains Interpro domain(s) IPR003663 Sugar/inositol transporter "	-1.80389	-1.94029	-2.68427	-2.16386
Solyc01g109480.2.1	0.306575	52.99	73.32	0.74518	29.47	47.54	0.000499	6.85	13.91	0.00032	10.6	13.39	Suspensor-specific protein (AHRD V1 *-*- Q9FUP6_PHACN)	1.452	-1.15259	-4.52863	-4.01504
Solyc01g109500.2.1	0.23025	19.11	42.54	0.670088	25.29	18.99	0.00125	96.71	65.58	0.00274	57.6	74.14	"BURP domain-containing protein (AHRD V1 *--- B2ZPK5_SOLTU); contains Interpro domain(s) IPR004873 BURP "	1.74033	1.22574	4.24535	3.34591
Solyc01g109590.2.1	0.0973681	11.42	18.24	0.0551486	15.37	19.09	0.0013	27.98	29.47	0.00154	27.96	24.46	"Receptor-like protein kinase (AHRD V1 ***- Q9LYS5_ARATH); contains Interpro domain(s) IPR002290 Serine/threonine protein kinase "	2.04488	2.31679	3.62314	3.21092
Solyc01g109700.2.1	0.831941	5.46	4.33	1	5.71	2.96	9.04e-06	23.78	47.77	0.00027	20.84	18.94	"Transcription factor (AHRD V1 *-** D6MKM4_9ASPA); contains Interpro domain(s) IPR011598 Helix-loop-helix DNA-binding "	1.23771	1.06224	8.03965	4.39594
Solyc01g109710.2.1	3.56e-05	50.08	44.96	0.00135	66.96	68.95	0.011634	101.3	75.84	2.44e-05	60.72	52.73	"Universal stress protein (AHRD V1 **-- B6SNQ1_MAIZE); contains Interpro domain(s) IPR006016 UspA "	-4.51497	-3.2681	-2.65628	-4.27614
Solyc01g109720.2.1	9.67e-06	28.52	23.57	0.00319	51.06	43.88	0.000567	38.3	40.79	0.000439	55.82	35.05	"Hydrolase-like (AHRD V1 ***- Q5VNP5_ORYSJ); contains Interpro domain(s) IPR000639 Epoxide hydrolase-like "	-4.97477	-2.83665	-3.6067	-3.24132
Solyc01g109750.2.1	1	0.23	1.15	1	2	1.25	0.00018	13.54	12.35	3.94e-05	13.29	13.21	"Syntaxin (AHRD V1 ***- Q6X9V9_HORVD); contains Interpro domain(s) IPR010989 t-SNARE "	-1.63715	1.27326	8.94135	8.89539
Solyc01g109790.2.1	1.84e-05	59.89	90.11	0.000411	52.94	64.45	0.500904	22.09	17.43	0.0835118	26.29	30.2	"Glucose-1-phosphate adenylyltransferase (AHRD V1 **** Q15I66_SOLLC); contains Interpro domain(s) IPR011831 Glucose-1-phosphate adenylyltransferase IPR005836 ADP-glucose pyrophosphorylase, conserved site "	5.38503	4.12581	1.31174	1.81909
Solyc01g109860.2.1	0.164696	2.9	7.35	0.240681	6.32	5.49	0.000273	1.68	1.15	0.000558	2.04	1.57	"Phosphatidylinositol/phosphatidylcholine transfer protein-like (AHRD V1 **-* Q9LRX7_ARATH); contains Interpro domain(s) IPR001251 Cellular retinaldehyde-binding/triple function, C-terminal "	-1.96045	-1.75492	-7.24136	-5.94455
Solyc01g109890.2.1	0.001	36.68	32.68	0.154525	96.42	54.8	0.00124	44.8	18.69	0.000202	31.52	37.12	"Chaperone protein dnaJ 10 (AHRD V1 **** B6T7D7_MAIZE); contains Interpro domain(s) IPR003095 Heat shock protein DnaJ "	-3.74079	-1.7901	-4.45787	-4.25883
Solyc01g109900.2.1	7.72e-06	598.98	529.64	0.00889	250.54	370.55	0.923749	116.73	123.39	0.634205	149.94	150.83	Unknown Protein (AHRD V1)	4.95806	2.64752	-1.0413	1.17061
Solyc01g109920.2.1	1	0.75	1.52	0.0186732	6.06	4.82	1	1.88	0.4	1	2.2	0.5	"Dehydrin (AHRD V1 *-*- Q6YL18_BRAJU); contains Interpro domain(s) IPR000167 Dehydrin "	1.76566	7.55206	1.64114	1.86389
Solyc01g109930.2.1	0.183447	7.54	11.06	0.0798835	12.78	10.2	0.0135077	16.56	12.28	0.00752	13.57	15.43	"Inositol monophosphatase family protein (AHRD V1 **** D7MGB6_ARALY); contains Interpro domain(s) IPR011809 Histidinol-phosphate phosphatase, putative, inositol monophosphatase "	2.03556	2.43785	2.88306	2.81425
Solyc01g109970.2.1	0.0216275	16.96	17.11	0.334971	10.35	11.91	0.102062	10.99	16.93	0.271587	12.82	11.16	"DNA repair protein (AHRD V1 *--- Q2UQK2_ASPOR); contains Interpro domain(s) IPR001650 DNA/RNA helicase, C-terminal "	2.55672	1.62715	1.91563	1.60335
Solyc01g109980.2.1	0.000433	39.4	39.45	0.0661695	17.95	26.05	0.033077	23.03	26.9	0.0560749	27.21	17.07	"BEL1-like homeodomain protein 6 (AHRD V1 *--- BLH6_ARATH); contains Interpro domain(s) IPR006563 POX "	4.06781	2.21047	2.35782	2.03321
Solyc01g110000.2.1	0.00456	19.7	20.74	0.174146	13.04	13.51	0.00176	24.29	25.35	0.000591	25.24	25.97	"Beta-galactosidase (AHRD V1 ***- B9H0V1_POPTR); contains Interpro domain(s) IPR001944 Glycoside hydrolase, family 35 "	3.11384	1.99171	3.4925	3.50099
Solyc01g110020.2.1	0.00257	32.34	34.68	0.321062	17.49	15.91	0.199449	20.43	18.06	0.106731	18.77	23.19	"BAH-PHD domain-containing protein (Fragment) (AHRD V1 **-- A9S8N5_PHYPA); contains Interpro domain(s) IPR001025 Bromo adjacent region "	3.1053	1.50543	1.63783	1.73745
Solyc01g110060.2.1	0.0403186	3.14	3.75	0.339433	5.57	8.37	0.182713	5.99	6.8	0.709385	10.38	10.69	"Purple acid phosphatase (AHRD V1 **** Q84KZ2_TOBAC); contains Interpro domain(s) IPR015914 Purple acid phosphatase, N-terminal "	-3.21522	-1.66338	-1.92773	-1.21441
Solyc01g110130.2.1	0.0627215	1.09	4.17	1	12.69	7.08	0.012089	39.99	36.3	0.0025	43.6	45.55	"DNA replication licensing factor (AHRD V1 ***- Q2TZM7_ASPOR); contains Interpro domain(s) IPR008047 MCM protein 4 "	-3.8046	-1.07767	3.35371	3.80291
Solyc01g110140.2.1	0.0547571	8.66	5.81	0.159292	5.51	8.44	0.16233	5.79	7.27	0.0427938	8.45	7.37	"Stylish (AHRD V1 **-- D2KC71_BRARP); contains Interpro domain(s) IPR007818 Protein of unknown function DUF702 "	3.14199	2.93343	2.60172	3.06079
Solyc01g110230.1.1	0.0380757	4.4	2.17	0.258668	1.47	1.72	1	0	0	1	0.18	0.09	"MEI2-like RNA binding protein (AHRD V1 *--- Q75M35_ORYSJ); contains Interpro domain(s) IPR007201 RNA recognition motif 2 "	26.5983	13.2121	1	2.00194
Solyc01g110290.2.1	0.0414357	63.1	66.29	0.412921	119.69	77	0.441336	116.95	91.61	0.352056	92.44	119.56	"Squalene synthase (AHRD V1 ***- D0VFU8_SOLLC); contains Interpro domain(s) IPR006449 Farnesyl-diphosphate farnesyltransferase "	-1.95428	-1.33372	-1.32542	-1.33974
Solyc01g110370.2.1	0.0192202	28.89	19.52	0.0559912	17.96	24.3	0.361495	16.03	13.74	0.23047	16.47	15.99	"Zinc finger protein CONSTANS-LIKE 3 (AHRD V1 *--- COL3_ARATH); contains Interpro domain(s) IPR000315 Zinc finger, B-box "	2.62966	2.2182	1.4778	1.56734
Solyc01g110430.2.1	0.77069	41.5	30.17	0.679435	21.06	48.93	0.286679	4.93	44.21	0.000131	11.58	3.27	Unknown Protein (AHRD V1)	-1.14848	-1.20997	-1.86171	-6.23015
Solyc01g110440.2.1	0.0564404	48.68	37.12	0.638533	180.25	63.98	0.160075	295.11	105.38	0.0493996	201.75	248.31	"Arginine decarboxylase (AHRD V1 **** Q9SCF0_DATST); contains Interpro domain(s) IPR002985 Arginine decarboxylase "	-2.19015	1.23635	1.9479	2.11502
Solyc01g110500.2.1	0.0037	27.16	34.98	0.230096	13.12	20.73	0.0618809	3.06	4.85	0.0352722	5.4	3.02	"Epsin 2-like protein (Fragment) (AHRD V1 *-*- D9HWY0_LAGLG); contains Interpro domain(s) IPR001026 Epsin, N-terminal "	3.20196	1.7064	-2.59647	-2.50733
Solyc01g110560.2.1	1	2.49	3.69	0.817698	4.12	1.53	0.000224	17.16	23.15	0.000758	16.43	16.23	"Auxin responsive SAUR protein (AHRD V1 *-*- Q1SN26_MEDTR); contains Interpro domain(s) IPR003676 Auxin responsive SAUR protein "	-1.10683	-1.24033	5.19804	4.09775
Solyc01g110620.1.1	5.82e-07	10.34	17.06	0.511444	0.47	2.06	1	0	0.23	1	0.22	0.08	"Auxin-induced SAUR-like protein (AHRD V1 ***- Q8S349_CAPAN); contains Interpro domain(s) IPR003676 Auxin responsive SAUR protein "	107.024	10.7305	1.84868	2.06711
Solyc01g110630.2.1	4.42e-09	16.47	23.08	0.258228	1.18	1.48	1	0.25	0	1	0.77	0.11	"Auxin-induced SAUR-like protein (AHRD V1 ***- Q8S351_CAPAN); contains Interpro domain(s) IPR003676 Auxin responsive SAUR protein "	154.231	11.1968	1.94831	4.22811
Solyc01g110680.2.1	1	3.95	0.29	0.793759	4.77	2.53	0.080292	5.47	9.9	0.00713	8.69	11.3	"Auxin-induced SAUR-like protein (AHRD V1 ***- Q8S351_CAPAN); contains Interpro domain(s) IPR003676 Auxin responsive SAUR protein "	-1.11975	1.44474	2.82652	3.56743
Solyc01g110700.2.1	1	0.65	0.44	1	1.37	0.35	0.0399644	5.52	3.16	0.0216724	3.79	5.44	Unknown Protein (AHRD V1)	-1.02099	1.4014	5.99763	6.21326
Solyc01g110840.2.1	0.737788	1.78	3.91	0.000671	7.16	25.58	0.0977986	6.53	4.08	0.726896	3.26	1.97	Unknown Protein (AHRD V1)	1.8383	10.0389	3.08595	1.51743
Solyc01g110890.1.1	0.00916	8.68	36.81	0.00336	29.51	6.5	1.84e-05	12.32	3.11	1.17e-06	8.58	7.18	"Auxin-induced SAUR-like protein (AHRD V1 ***- Q8S351_CAPAN); contains Interpro domain(s) IPR003676 Auxin responsive SAUR protein "	-4.17287	-5.37974	-12.9301	-13.1179
Solyc01g110990.2.1	1	13.94	16.55	0.788575	11.89	15.89	0.0955771	5.37	12.22	0.00627	7.87	5.01	"ATP-dependent RNA helicase (AHRD V1 **** Q16PT8_AEDAE); contains Interpro domain(s) IPR011709 Region of unknown function DUF1605 "	-1.03498	-1.16786	-1.95179	-2.71482
Solyc01g111050.2.1	0.00372	12.97	11.58	0.229821	2.12	12.22	0.0804576	0.03	0.13	0.0717086	0.29	0.03	"Ch-cobra (AHRD V1 ***- B7S746_CUNLA); contains Interpro domain(s) IPR006918 Glycosyl-phosphatidyl inositol-anchored, plant "	4.81813	2.74352	-13.0543	-9.83465
Solyc01g111110.2.1	0.0018	14.69	7.28	0.00588	5.26	17.45	0.00177	11.02	11.21	0.00101	7.94	17.43	Unknown Protein (AHRD V1)	6.32765	6.34418	5.8353	6.49095
Solyc01g111160.2.1	0.00999	6.26	10.75	8.1e-06	100.59	9.58	8.92e-17	182.09	216.08	6.72e-20	178.27	259.09	Unknown Protein (AHRD V1)	4.98855	30.4431	105.714	113.694
Solyc01g111170.2.1	0.374682	318.06	266.08	0.337424	603.13	625.49	0.00971	1091.3	1562.18	0.00617	1333.95	1192.73	"Peptidyl-prolyl cis-trans isomerase (AHRD V1 ***- Q9XF12_SOLTU); contains Interpro domain(s) IPR002130 Peptidyl-prolyl cis-trans isomerase, cyclophilin-type "	-1.40076	1.44875	2.9379	2.72574
Solyc01g111200.2.1	0.0107596	39.85	32.24	0.190064	57.82	56.19	0.0988901	62.4	39.33	0.0355229	52.71	48.78	"Eukaryotic translation initiation factor 4B (AHRD V1 **** Q9AUJ7_WHEAT); contains Interpro domain(s) IPR010433 Plant specific eukaryotic initiation factor 4B "	-2.42345	-1.59015	-1.88327	-1.94866
Solyc01g111210.2.1	1	3.05	2.99	0.502799	6.16	4.18	0.0347838	11.55	7.82	0.0361314	9.48	8.45	"Glutamyl-tRNA(Gln) amidotransferase subunit A (AHRD V1 ***- B6JZE9_SCHJY); contains Interpro domain(s) IPR000120 Amidase signature enzyme "	1.02751	1.67784	2.93749	2.64625
Solyc01g111220.2.1	0.00382	7.95	5.46	0.0253605	3.01	6.89	1	0.4	0.17	1	1.79	0.84	"Glutamyl-tRNA(Gln) amidotransferase subunit A (AHRD V1 ***- B2WKK5_PYRTR); contains Interpro domain(s) IPR000120 Amidase signature enzyme "	14.3849	10.4222	-1.21759	2.75778
Solyc01g111230.2.1	0.00196	6.8	27.17	0.00224	11.87	15.32	0.000121	15.95	20.76	9.11e-06	22.5	18.7	"Disease resistance response like protein (AHRD V1 ***- Q9SZP7_ARATH); contains Interpro domain(s) IPR004265 Plant disease resistance response protein "	6.03663	4.78573	6.0679	6.62295
Solyc01g111250.2.1	0.0150497	139.64	114.29	0.343932	221.16	236.24	0.000564	93.8	22.59	9.98e-06	57.97	77.34	"Phosphatidylinositol-specific phospholipase c (AHRD V1 *-*- B9UXN2_LISMO); contains Interpro domain(s) IPR017946 PLC-like phosphodiesterase, TIM beta/alpha-barrel domain "	-2.47325	-1.42332	-5.87147	-5.23046
Solyc01g111260.2.1	0.0370331	67.34	67.12	0.164212	75.09	102.98	0.000188	37.79	25.54	0.000176	31.04	46.02	"Phosphatidylinositol-specific phospholipase c (AHRD V1 *-*- B9UY71_LISMO); contains Interpro domain(s) IPR017946 PLC-like phosphodiesterase, TIM beta/alpha-barrel domain "	-2.25604	-1.75378	-5.22187	-4.41153
Solyc01g111310.2.1	0.621042	1.74	2.38	0.195152	7.77	10.72	0.0216233	17.42	10.14	0.00124	17.06	17.98	"Transmembrane amino acid transporter protein (AHRD V1 **** A8NP23_BRUMA); contains Interpro domain(s) IPR013057 Amino acid transporter, transmembrane "	-1.84626	2.25361	3.14302	3.85255
Solyc01g111320.2.1	0.0984233	9.59	7.97	0.151897	7.89	9.19	0.022618	12.84	9.92	0.00659	12.4	12.61	"Thaumatin-like protein (AHRD V1 **-- Q9ZQY9_ARATH); contains Interpro domain(s) IPR001938 Thaumatin, pathogenesis-related "	2.54449	2.40275	3.00789	3.20889
Solyc01g111330.2.1	1	1.19	2.29	0.181675	6.38	5.44	2.71e-05	21.8	18.06	1.36e-06	21.07	24.3	"Thaumatin-like protein (AHRD V1 ***- Q9STX6_ARATH); contains Interpro domain(s) IPR001938 Thaumatin, pathogenesis-related "	-1.27501	2.46177	7.70917	8.52057
Solyc01g111350.2.1	7.91e-06	2.87	4.96	0.15164	24.71	3.5	0.198183	13.81	22.43	0.880508	27.38	38	"Nodulin family protein (AHRD V1 ***- D7MDH3_ARALY); contains Interpro domain(s) IPR010658 Nodulin-like "	-6.75888	-2.00525	-1.63911	1.07285
Solyc01g111400.2.1	0.05112	5.74	8.3	0.0870131	5.97	7.04	0.000534	15.19	13.56	2.19e-05	19.33	16.44	"Subtilisin-like protease (AHRD V1 **-- A9XG40_TOBAC); contains Interpro domain(s) IPR015500 Peptidase S8, subtilisin-related "	3.03118	2.74069	5.64185	6.80743
Solyc01g111440.2.1	0.0016	42.07	24.07	0.029148	55.85	52.19	0.000277	35.2	12.75	3.85e-06	23.09	23.43	"Senescence-associated protein 12 (AHRD V1 *-*- O81657_HEMSP); contains Interpro domain(s) IPR009686 Senescence-associated "	-3.62791	-2.32016	-5.49052	-5.85274
Solyc01g111450.2.1	0.251149	10	20.85	0.733712	14.85	7.79	0.000418	33.95	64.42	0.00011	44.69	45.44	"Proteasome subunit alpha type (AHRD V1 ***- Q38HT8_SOLTU); contains Interpro domain(s) IPR000426 Proteasome, alpha-subunit, conserved site "	1.66872	1.19629	4.86156	4.34758
Solyc01g111500.2.1	1.63e-06	4.83	6.68	0.0208443	22.54	11.51	0.00706	7.04	21	0.000654	17.99	8.1	"MYB transcription factor (AHRD V1 **** B9H191_POPTR); contains Interpro domain(s) IPR015495 Myb transcription factor "	-7.00767	-2.4874	-3.20053	-3.52812
Solyc01g111550.2.1	0.410765	0.28	0.81	1	2.78	0.44	0.0427686	6.15	8.28	0.0319196	7.81	6.79	"Protein MCM10 homolog (AHRD V1 *--- MCM10_XENTR); contains Interpro domain(s) IPR015408 Zinc finger, Mcm10/DnaG-type "	-3.2235	-1.28202	3.09565	3.04309
Solyc01g111570.2.1	0.0350799	12.5	15.71	0.0638276	20.61	9.37	0.667642	29.19	54.57	0.895802	41.16	34.78	"Receptor-like kinase (AHRD V1 *-*- A7VM42_MARPO); contains Interpro domain(s) IPR002290 Serine/threonine protein kinase "	-2.23197	-2.17748	1.20435	1.06671
Solyc01g111580.2.1	0.0212841	22.43	19.67	0.543199	35.62	45.91	0.246241	33.6	36.54	0.0286299	28.21	25.09	"BZIP family transcription factor (Fragment) (AHRD V1 *-*- D7LU06_ARALY); contains Interpro domain(s) IPR011700 Basic leucine zipper "	-2.37969	-1.27162	-1.57227	-2.12455
Solyc01g111590.2.1	0.148943	1.47	3.4	0.913643	8.39	10.04	0.0555114	21.39	20.23	0.0120913	28.47	25.07	"Histone-binding protein RBBP7 (AHRD V1 **-* B5X3G4_SALSA); contains Interpro domain(s) IPR020472 G-protein beta WD-40 repeat, region "	-3.17556	1.11657	2.34852	2.92465
Solyc01g111610.2.1	0.365121	6.93	7.99	0.861625	8.06	2.37	0.0354315	33.66	3.14	0.00706	18.31	10.82	Protein binding protein (AHRD V1 **-- D7L0L7_ARALY)	1.90181	1.28402	4.2622	3.28416
Solyc01g111640.2.1	0.0258079	28.68	26.1	0.243278	14.83	24.68	0.191266	6.28	7.88	0.0766267	7.26	5.39	"Skp1 (AHRD V1 ***- Q49HP3_CAPAN); contains Interpro domain(s) IPR016897 E3 ubiquitin ligase, SCF complex, Skp subunit "	2.36853	1.66141	-1.7638	-2.02267
Solyc01g111730.2.1	0.0707564	28.2	22.24	0.0374311	30.24	30.81	0.317962	19.91	20.86	0.487445	16.4	22.03	"Phosphatase 2C family protein (AHRD V1 ***- D7MEZ6_ARALY); contains Interpro domain(s) IPR015655 Protein phosphatase 2C "	1.95445	2.28383	1.44003	1.32314
Solyc01g111790.1.1	4.83e-13	45.45	69.85	8.77e-05	5.65	17.29	1	0.01	0.11	1	0.98	0.54	"Serine/threonine-protein phosphatase 2A regulatory subunit delta 1 isoform (AHRD V1 ***- Q0CAR1_ASPTN); contains Interpro domain(s) IPR002554 Protein phosphatase 2A, regulatory B subunit, B56 "	176.892	35.1588	-1.77752	2.51303
Solyc01g111820.2.1	0.000172	3.21	2.82	0.0850539	8.05	10.05	3.68e-05	4.58	0.62	7.05e-06	4.07	2.07	Unknown Protein (AHRD V1)	-5.72518	-2.02266	-7.19538	-6.30993
Solyc01g111840.2.1	0.00204	10.2	12.81	0.0392008	8.03	7.85	0.0848489	7.06	5.44	0.0313334	7.09	8.36	"MFS-type drug efflux transporter P55 (AHRD V1 *--* MFS55_MYCTU); contains Interpro domain(s) IPR016196 Major facilitator superfamily, general substrate transporter "	5.51309	3.71367	2.77831	3.33042
Solyc01g111880.2.1	0.0144088	0.98	1.23	0.0443652	2.01	1.26	0.0109412	13.96	32.17	0.345645	11.83	11.06	"Tyrosine-protein kinase transforming protein Src (AHRD V1 *-** SRC_AVIST); contains Interpro domain(s) IPR015783 ATMRK serine/threonine protein kinase-like "	-5.68596	-4.09152	3.01678	1.46518
Solyc01g111900.2.1	0.429517	0.26	1.31	0.515947	6.47	1.56	0.000188	19.34	14.56	6.55e-06	18.61	20.7	"O-methyltransferase-like protein (AHRD V1 ***- Q9T003_ARATH); contains Interpro domain(s) IPR016461 O-methyltransferase, COMT, eukaryota "	-2.4994	1.75102	6.95545	7.85506
Solyc01g111950.2.1	8.87e-07	13.34	12.35	0.506848	0.38	1.32	1	0.00948	0	1	0.07	0.17	"Receptor-like kinase (AHRD V1 *-*- A7VM42_MARPO); contains Interpro domain(s) IPR002290 Serine/threonine protein kinase "	100.957	7.50516	1.03528	1.87096
Solyc01g111960.2.1	7.97e-24	221.23	231.91	3.13e-12	38.21	78.37	1	0.03	0	0.0157252	4.69	3.21	"GDSL esterase/lipase At5g55050 (AHRD V1 ***- GDL87_ARATH); contains Interpro domain(s) IPR001087 Lipase, GDSL "	1762.88	450.833	1.09912	30.0122
Solyc01g111970.2.1	0.0297186	1.81	2.32	0.126661	2.48	3.98	0.00172	1.34	1.36	0.00135	1.36	1.45	"Laccase 1a (AHRD V1 **-- B9IG56_POPTR); contains Interpro domain(s) IPR001117 Multicopper oxidase, type 1 "	-3.62284	-2.43657	-5.86699	-5.81567
Solyc01g111980.2.1	0.143222	697.7	456.38	0.190382	590.02	539.19	0.16746	278.5	134.29	0.00713	118.74	172.5	"Lysine/histidine transporter (AHRD V1 **** B9HR02_POPTR); contains Interpro domain(s) IPR013057 Amino acid transporter, transmembrane "	1.72185	1.61493	-1.78408	-2.6041
Solyc01g112000.2.1	0.00103	601.99	331.2	1.59e-05	807.25	656.03	0.733997	252.62	55.92	0.58358	132.91	195.35	"Expansin-like protein (AHRD V1 ***- A7X331_SOLLC); contains Interpro domain(s) IPR007112 Expansin 45, endoglucanase-like IPR007117 Pollen allergen/expansin, C-terminal "	3.97009	5.93796	1.19629	1.23019
Solyc01g112040.2.1	0.000333	29.75	20.42	0.0180697	50.16	30.73	0.0156635	51.45	28.57	0.000187	27.73	32.72	Unknown Protein (AHRD V1)	-3.69298	-2.39457	-2.54489	-3.46902
Solyc01g112050.2.1	0.000375	24.83	22.38	0.0133135	47.12	17.76	0.0316531	51.88	27.48	0.000123	26.43	25.29	"Bzip transcription factor-like (AHRD V1 *-*- Q8RU34_ORYSJ); contains Interpro domain(s) IPR006867 Protein of unknown function DUF632 "	-3.61795	-2.75093	-2.3552	-3.72582
Solyc01g112070.2.1	0.34271	10.48	13.44	0.163731	39.65	25.57	0.0331538	10.78	4.58	0.0641115	12.24	8.28	"Os03g0169000 protein (Fragment) (AHRD V1 ***- Q0DUS7_ORYSJ); contains Interpro domain(s) IPR004348 Protein of unknown function DUF246, plant "	-1.46323	1.78794	-2.46623	-1.90989
Solyc01g112080.2.1	0.0055	26.36	22.93	0.216569	37.39	51.31	0.0121757	34.99	18.63	0.00338	26.22	29.51	"LysM-domain GPI-anchored protein (AHRD V1 **-- Q4VVD8_ORYSJ); contains Interpro domain(s) IPR002482 Peptidoglycan-binding Lysin subgroup "	-2.75192	-1.58077	-2.76645	-2.74476
Solyc01g112100.2.1	0.0187702	14.04	29.04	0.107684	17.6	16.32	0.739134	6.59	7.35	0.242739	5	5.31	"Dimethylaniline monooxygenase 5 (AHRD V1 **** B5X0U9_SALSA); contains Interpro domain(s) IPR012143 Dimethylaniline monooxygenase, N-oxide-forming "	2.68007	2.06774	-1.23093	-1.69656
Solyc01g112190.2.1	0.330001	49.36	77.46	0.0296802	48.1	33.22	0.000305	12.17	29.07	0.00311	28.67	41.82	"Nodule inception protein (Fragment) (AHRD V1 ***- A9DMJ4_MEDTR); contains Interpro domain(s) IPR003035 Plant regulator RWP-RK "	-1.42095	-2.27484	-4.75347	-2.84015
Solyc01g112220.2.1	0.290416	31.08	27.34	0.260471	27.89	30.27	0.145944	28.92	24.72	0.0477315	27.79	21.1	"Serine/threonine protein kinase-like (AHRD V1 **** Q5XWQ1_SOLTU); contains Interpro domain(s) IPR002290 Serine/threonine protein kinase "	-1.49949	-1.5574	-1.79012	-2.02405
Solyc01g112280.2.1	0.0210103	25.27	25.77	0.254001	17.75	18.25	0.268673	17.68	18.88	0.266072	17.49	17.99	"Succinyl-diaminopimelate desuccinylase (AHRD V1 **-- DAPE_MAGSA); contains Interpro domain(s) IPR010159 N-acyl-L-amino-acid amidohydrolase "	2.33826	1.60284	1.53244	1.44577
Solyc02g005110.2.1	0.389515	1.2	2.94	1	2.57	0	0.00724	4.51	7.43	0.00644	6.01	5.59	Unknown Protein (AHRD V1)	3.26473	2.02675	8.3647	7.94355
Solyc02g014030.1.1	1	1.71	1.22	1	2.85	0	0.00702	9.96	9.54	0.180496	6.89	4.08	Pto-like, Serine/threonine kinase protein, resistance protein	-1.28571	-1.37386	4.42631	2.4524
Solyc02g014220.2.1	0.0222764	1.07	18.05	0.0592261	5.75	4.45	0.453802	2.91	2.27	0.453625	3.03	2.14	"Endoglucanase 1 (AHRD V1 ***- B6U0J0_MAIZE); contains Interpro domain(s) IPR001701 Glycoside hydrolase, family 9 "	7.35061	3.92839	1.92754	1.87767
Solyc02g014300.1.1	0.013903	0.19	27.75	0.0100689	6.55	7.53	1	1.73	1.33	1	1.81	0.29	"Pectinesterase (AHRD V1 ***- B9RPW2_RICCO); contains Interpro domain(s) IPR000070 Pectinesterase, catalytic "	13.5516	6.89083	1.50936	1.04479
Solyc02g014460.2.1	1	1.44	1.45	0.430152	3.7	4.83	0.00282	10.12	11.65	0.00017	15.34	11.37	"WD repeat-containing protein (AHRD V1 ***- C5JDC9_AJEDS); contains Interpro domain(s) IPR017986 WD40 repeat, region "	-1.22281	2.21972	5.245	6.24492
Solyc02g014470.2.1	1	0.37	1.71	0.634578	1.65	1.49	0.00368	5.33	7.2	0.0706462	4.15	3.75	"Lipase-like protein (AHRD V1 ***- Q8LF19_ARATH); contains Interpro domain(s) IPR002921 Lipase, class 3 "	1.59522	2.25479	8.02699	4.99685
Solyc02g014730.2.1	0.366023	3.16	3.98	0.0721558	14.05	1.44	0.0104726	8.84	6.7	0.00275	8.96	9.55	Cytochrome P450	2.44536	4.95732	4.80078	5.55481
Solyc02g014830.2.1	1.14e-07	56.66	78.11	0.00251	24.56	29.77	0.0479631	2.59	3.15	0.856706	9.65	4.63	"Serine carboxypeptidase (AHRD V1 **** A6XH04_ARATH); contains Interpro domain(s) IPR001563 Peptidase S10, serine carboxypeptidase "	8.85872	3.4952	-2.76537	-1.17355
Solyc02g021400.1.1	0.0231816	68.9	178.87	0.205123	244.4	135.98	0.988725	278.67	361.39	1	424.49	232.04	"40S ribosomal protein S28 (AHRD V1 ***- B6T1V2_MAIZE); contains Interpro domain(s) IPR000289 Ribosomal protein S28e "	-2.3779	-1.58156	1.007	1.00022
Solyc02g021680.2.1	0.499017	10.97	10.87	0.416017	7.09	13.3	0.00596	4.15	5.64	0.00346	5.72	4.73	"WRKY transcription factor 37 (AHRD V1 *-*- Q6IEP4_ORYSJ); contains Interpro domain(s) IPR003657 DNA-binding WRKY "	-1.32366	-1.45824	-3.18172	-3.06788
Solyc02g022930.2.1	0.0463569	9.73	13.6	0.0806692	9.82	13.28	0.101473	11.57	11.2	0.15175	8.65	11.56	"3-hydroxyisobutyrate dehydrogenase-like protein (AHRD V1 ***- Q1ECP8_ARATH); contains Interpro domain(s) IPR011548 3-hydroxyisobutyrate dehydrogenase "	2.42479	2.3352	2.1732	1.88111
Solyc02g023950.2.1	1	1.54	3.5	0.53055	6.03	4.7	0.204204	5.52	7.95	0.0295491	8.22	10.93	Receptor like kinase, RLK	-1.13519	1.77379	2.0859	2.86597
Solyc02g024000.2.1	0.0323429	11.19	13.32	0.422811	11.25	4.2	0.0871991	9.14	12.08	0.0935859	9.99	10.71	WPP domain-associated protein (Fragment) (AHRD V1 ***- WAP_SOLLC)	2.66025	1.63226	2.11149	2.00349
Solyc02g024070.2.1	0.81577	5	4.41	0.207618	10.01	5.52	4.72e-07	41.14	38.22	5.74e-07	29.71	32.52	"Class III homeodomain-leucine zipper (AHRD V1 ***- Q1WD30_GINBI); contains Interpro domain(s) IPR013978 MEKHLA "	1.28585	2.03203	9.70323	7.40695
Solyc02g030170.2.1	0.0127388	250.79	326.44	0.0316055	278.1	264.98	0.567339	183	157.18	0.600019	152.97	182.9	"FAD linked oxidase domain protein (AHRD V1 **-- D1VPW7_9ACTO); contains Interpro domain(s) IPR006094 FAD linked oxidase, N-terminal "	2.26989	2.0783	1.22957	1.18147
Solyc02g030200.1.1	0.283997	4.72	6.93	0.173593	22.46	0	0.0618689	13.54	5	0.00205	9.83	15.52	AP2 domain-containing transcription factor (AHRD V1 ***- B9II84_POPTR)	2.37797	4.22753	3.45626	4.6017
Solyc02g030300.2.1	0.680782	15.73	9.83	0.836828	17.44	20.12	0.0100415	6.79	1.39	0.00221	4.22	3.67	"Serine/threonine-protein kinase receptor (AHRD V1 **** B6U2B7_MAIZE); contains Interpro domain(s) IPR002290 Serine/threonine protein kinase "	-1.25215	1.12782	-4.20464	-4.4809
Solyc02g030480.2.1	0.23771	0.19	8.63	0.164701	6.1	2.03	1.27e-10	41.64	57.64	2.22e-11	34.88	35.66	"Cinnamyl alcohol dehydrogenase-like protein (AHRD V1 **** A9PHZ1_POPTR); contains Interpro domain(s) IPR002085 Alcohol dehydrogenase superfamily, zinc-containing "	4.55912	4.20294	47.311	32.9467
Solyc02g031710.2.1	0.00989	14.11	11.63	0.0370096	12.62	18.88	0.0218475	14.67	16.89	0.0220228	19.78	15.61	"Protein binding protein (AHRD V1 **-- D7L0L7_ARALY); contains Interpro domain(s) IPR001841 Zinc finger, RING-type "	-2.95148	-2.49055	-2.64719	-2.43327
Solyc02g031840.2.1	0.000454	20.6	17.41	0.0482962	10.43	12.68	0.306764	6.67	7.87	0.64857	6.14	6.08	"Potassium transporter (AHRD V1 **** A9SMZ3_PHYPA); contains Interpro domain(s) IPR003855 K+ potassium transporter "	4.90792	2.90279	1.73549	1.42404
Solyc02g031960.2.1	0.501395	0.8	1.75	0.023554	0.44	10.18	1	0.69	0	0.500152	0.13	1.81	"Oil palm polygalacturonase allergen PEST361 (AHRD V1 ***- A1KXJ4_ELAGV); contains Interpro domain(s) IPR007524 Pectate lyase, N-terminal "	10.899	42.3048	3.58399	8.12408
Solyc02g031990.1.1	0.111346	9.43	4.39	0.171045	7.12	9.57	0.000237	4.29	1.06	4.59e-06	1.75	1.87	Unknown Protein (AHRD V1)	-2.08036	-1.78902	-5.72604	-8.50879
Solyc02g032100.2.1	1.71e-08	30.37	41.95	0.000907	11.38	27.08	0.614236	5.77	3.39	0.33357	6.08	6.01	"Low affinity zinc transporter (AHRD V1 **** A3LU47_PICST); contains Interpro domain(s) IPR004698 Zinc/iron permease, fungal and plant "	12.611	6.59935	1.50712	1.92115
Solyc02g032170.2.1	0.441189	3.56	7.35	0.0670382	4.07	0	0.0955725	3.12	3.93	0.0105115	2.41	0.78	Unknown Protein (AHRD V1)	-1.485	-3.97258	-2.46442	-5.35293
Solyc02g032550.1.1	0.345445	3.59	10.21	0.00322	14.26	16.97	1	5.36	1.87	0.3286	2.75	10.71	"Ectonucleoside triphosphate diphosphohydrolase 6 (AHRD V1 **-- Q6YHK4_CAVPO); contains Interpro domain(s) IPR000407 Nucleoside phosphatase GDA1/CD39 "	1.87278	4.10356	-1.08687	1.64584
Solyc02g032560.1.1	0.0274807	5.29	4.22	0.40009	0.95	2.76	1	0.24	0.51	1	0.38	0.5	"Ectonucleoside triphosphate diphosphohydrolase 6 (AHRD V1 **-- Q6YHK4_CAVPO); contains Interpro domain(s) IPR000407 Nucleoside phosphatase GDA1/CD39 "	7.38662	2.91882	-1.41665	-1.2726
Solyc02g032660.2.1	0.396932	44.39	44.97	0.248897	48.59	55.4	0.0198275	14.57	14.37	0.0142048	12.63	17.89	"MATE efflux family protein expressed (AHRD V1 **-- Q10HY1_ORYSJ); contains Interpro domain(s) IPR002528 Multi antimicrobial extrusion protein MatE "	1.35383	1.52748	-2.48216	-2.41499
Solyc02g032840.1.1	0.0141028	35.75	80.89	0.00796	52.64	74.2	0.0196021	54.53	61.44	0.140035	37.9	42.38	Unknown Protein (AHRD V1)	2.85192	3.06118	2.62688	1.7764
Solyc02g032860.2.1	8.02e-06	4.53	7.93	4.82e-06	6.14	4.06	1.99e-05	8.22	6.51	1.23e-05	10.17	7.29	"Phosphoadenosine phosphosulfate reductase (AHRD V1 *-** A6EX37_9ALTE); contains Interpro domain(s) IPR004508 Thioredoxin-independent 5'-adenylylsulphate reductase "	-6.39461	-7.99877	-5.90405	-5.14638
Solyc02g032870.2.1	0.526555	1.11	2.5	1	3.18	3.22	0.0106223	10.59	11.56	0.030406	9.95	10.03	"5&apos;-tyrosyl-DNA phosphodiesterase (AHRD V1 *--- TDP2_BOVIN); contains Interpro domain(s) IPR005135 Endonuclease/exonuclease/phosphatase "	-1.65425	1.0135	3.21476	2.82246
Solyc02g032910.1.1	0.13814	3.89	2.59	1.47e-06	14.38	21.18	0.219331	2.84	2.03	0.375381	2.36	1.59	Glycine rich protein (AHRD V1 *-*- Q43498_SOLLC)	9.15524	47.526	6.47415	5.20181
Solyc02g032940.2.1	0.634296	1.63	4.13	1	5.26	3.45	0.0342049	11.73	12.53	0.105752	11.19	10.63	"Aspartic proteinase (AHRD V1 **-* Q8L6A8_THECC); contains Interpro domain(s) IPR001461 Peptidase A1 "	-1.54798	-1.0699	2.41117	2.11192
Solyc02g036470.2.1	0.0107442	10.52	9.98	0.092695	5.16	10.25	0.222458	5.18	6.57	0.302874	6.16	5.12	"Drug/metabolite transporter (AHRD V1 ***- B4TLZ1_SALSV); contains Interpro domain(s) IPR000620 Protein of unknown function DUF6, transmembrane "	3.87495	2.85223	2.04966	1.91586
Solyc02g036480.1.1	0.00247	38.69	28.15	0.258177	84.69	60.47	0.0142234	56.33	25.39	5.54e-05	26.01	28.79	"Harpin-induced protein-like (Fragment) (AHRD V1 **-- D2CFH8_COFAR); contains Interpro domain(s) IPR010847 Harpin-induced 1 "	-3.18226	-1.52998	-2.85273	-4.38675
Solyc02g037500.1.1	0.701064	9.43	8.24	1	7.8	14.35	0.0114983	3.61	2.77	0.0466281	5.24	5.35	Unknown Protein (AHRD V1)	-1.23952	-1.01788	-3.6638	-2.31072
Solyc02g037530.2.1	0.87507	7.99	7.68	0.0629911	13.4	18.86	0.0232112	18.33	18.97	0.0235504	18.6	17.3	"Auxin response factor 8 (AHRD V1 **** A7L5C4_SOLLC); contains Interpro domain(s) IPR010525 Auxin response factor "	1.14536	2.27556	2.46662	2.30533
Solyc02g037540.1.1	0.00083	1.98	1.91	0.0015	2.57	1.71	0.00279	4.95	1.23	3.93e-05	1.91	1.53	Cc-nbs-lrr, resistance protein	-6.23456	-5.88888	-4.38221	-7.80363
Solyc02g038720.1.1	2.45e-21	141.82	195.24	3.23e-12	38.19	38.81	1	0	0	0.0626907	3.4	2.37	"Acyl carrier protein (AHRD V1 ***- B9RR02_RICCO); contains Interpro domain(s) IPR003231 Acyl carrier protein (ACP) "	1304.18	295.9	1	22.2056
Solyc02g038740.2.1	4.24e-07	71.35	73.2	0.00211	29.35	42.21	0.769227	8.64	8.35	0.118026	5.29	6.04	"3-hydroxy-3-methylglutaryl coenzyme A reductase (AHRD V1 **** Q9FS01_SOLTU); contains Interpro domain(s) IPR004554 Hydroxymethylglutaryl-CoA reductase, class I, catalytic "	7.46499	3.5996	-1.22662	-1.87431
Solyc02g055370.2.1	0.139827	3.35	0.88	0.00886	2.77	6.38	0.0192895	5.97	1.69	0.00788	2.53	5.89	"Transcriptional factor B3 family protein (AHRD V1 ***- D7LIC1_ARALY); contains Interpro domain(s) IPR003340 Transcriptional factor B3 "	17.4972	36.1369	29.5417	31.9344
Solyc02g061660.1.1	0.0356122	3.77	2.56	1	0.89	0	1	0	0	1	0.12	0.16	Unknown Protein (AHRD V1)	25.6435	4.42227	1	2.0251
Solyc02g061850.2.1	0.0445323	10.32	4.97	0.16203	5.06	6.13	1	2.17	2.22	1	1.98	1.97	"Phospholipase D (AHRD V1 **** Q6AVR2_ORYSJ); contains Interpro domain(s) IPR011402 Phospholipase D, plant "	3.49335	2.48195	-1.04641	-1.18609
Solyc02g062000.2.1	0.850659	81.78	65.82	0.797141	79.85	69.74	0.0831954	49.02	40.92	0.0193969	38.22	41.41	"RUN and FYVE domain-containing protein 1 (AHRD V1 *--- B0WS48_CULQU); contains Interpro domain(s) IPR000306 Zinc finger, FYVE-type "	-1.07652	-1.10323	-1.9392	-2.25144
Solyc02g062020.2.1	0.0110284	11.1	13.05	0.278411	17.51	22.85	0.705199	27.53	30.03	0.921484	32.28	33.63	"Ras-like GTP-binding protein RHO (AHRD V1 **-- RHO_APLCA); contains Interpro domain(s) IPR003578 Ras small GTPase, Rho type "	-2.53013	-1.56226	-1.1672	-1.04791
Solyc02g062040.2.1	0.0520884	20.08	13.15	0.0363378	13.18	25.79	0.342568	4.64	3.92	0.454931	5.97	5.21	"RING finger-like (AHRD V1 *-*- Q5Z6V1_ORYSJ); contains Interpro domain(s) IPR018957 Zinc finger, C3HC4 RING-type "	2.31644	2.62536	-1.79642	-1.42047
Solyc02g062090.1.1	0.500448	0.6	1.1	0.0205518	0.96	8.37	1	0.82	0.26	1	0.12	0.61	Unknown Protein (AHRD V1)	2.94628	14.2331	1.90386	1.38051
Solyc02g062320.2.1	0.0185265	4.18	3.47	0.50603	0.43	1.26	1	0.02	0.07	1	0.13	0	"BURP domain-containing protein (AHRD V1 **-- B7STY7_CAMSI); contains Interpro domain(s) IPR004873 BURP "	30.7727	7.49001	1.32666	1.48326
Solyc02g062360.2.1	0.00104	13.76	18.87	0.00707	27.58	11.48	0.00291	21.22	16.65	0.00033	13.89	19.35	"Histone-lysine N-methyltransferase NSD3 (AHRD V1 *--- NSD3_HUMAN); contains Interpro domain(s) IPR018144 Plus-3 domain, subgroup "	-3.86471	-3.34984	-3.62951	-4.24194
Solyc02g062370.2.1	0.000827	31.14	23.43	0.00542	43.19	26.5	0.00145	34.07	26.77	0.000278	24.02	33.7	"Zinc finger CCCH domain-containing protein 19 (AHRD V1 *-*- C3H19_ARATH); contains Interpro domain(s) IPR003169 GYF "	-3.80927	-3.11278	-3.75609	-4.06361
Solyc02g062390.2.1	0.281705	6.06	9.8	1.49e-10	98.62	77.98	1	4.29	3.53	1	7.44	1.37	"Unknown Protein (AHRD V1); contains Interpro domain(s) IPR000167 Dehydrin "	1.98702	21.1074	-1.08924	-1.00184
Solyc02g062460.2.1	0.040418	113.95	93.95	0.35784	165.76	157.25	0.222962	198	85.15	0.010568	107.95	99.07	"2-oxoglutarate-dependent dioxygenase (AHRD V1 **** B9GL08_POPTR); contains Interpro domain(s) IPR005123 Oxoglutarate and iron-dependent oxygenase "	-2.08523	-1.39285	-1.67351	-2.37023
Solyc02g062470.1.1	1	0	0	0.509858	0.16	1.42	0.0627585	2.69	2.2	0.0202656	1.19	6.57	2-oxoglutarate-dependent dioxygenase (Fragment) (AHRD V1 ***- Q944Z0_ARAHA)	-2.24897	3.11416	8.31486	12.6912
Solyc02g062490.2.1	0.629851	1.62	1.98	0.655594	2.95	0	3e-05	18.58	7.98	7.84e-06	12.74	14.53	"2-oxoglutarate-dependent dioxygenase (Fragment) (AHRD V1 ***- Q944Y0_ARATH); contains Interpro domain(s) IPR005123 Oxoglutarate and iron-dependent oxygenase "	2.67449	2.15786	17.2376	17.2061
Solyc02g062500.2.1	0.000569	7.94	13.11	0.235435	33.41	18.55	0.070699	23.42	19.57	0.0868314	22.44	26.72	"2-oxoglutarate-dependent dioxygenase (AHRD V1 **** B9GL08_POPTR); contains Interpro domain(s) IPR005123 Oxoglutarate and iron-dependent oxygenase "	-3.73343	-1.57264	-2.00167	-1.80024
Solyc02g062510.2.1	0.00199	1.38	15.26	0.0159137	6.54	2.2	7.04e-05	10.9	9.59	3.5e-06	12.03	12.7	"Peroxidase (AHRD V1 ***- Q0ZA68_9ROSI); contains Interpro domain(s) IPR002016 Haem peroxidase, plant/fungal/bacterial "	25.5686	13.5401	29.9003	35.2113
Solyc02g062550.2.1	0.0639677	53.81	23.61	0.587401	100.96	48.13	0.120395	71.14	15.05	0.00217	31.62	26.71	"Cell division protease ftsH homolog (AHRD V1 *--- FTSH_HELPY); contains Interpro domain(s) IPR003959 ATPase, AAA-type, core "	-2.31882	-1.27425	-2.29318	-3.51787
Solyc02g062560.2.1	0.781123	10.05	10.72	0.632006	14.64	9.49	0.00934	26.69	25.06	0.0266341	22.04	22.42	"TIM-barrel enzyme family protein (AHRD V1 *--- C5JTT1_AJEDS); contains Interpro domain(s) IPR008322 Uncharacterised conserved protein UCP033271 IPR009215 TIM-barrel signal transduction protein, predicted IPR018087 Glycoside hydrolase, family 5, conserved site "	1.15868	1.30067	2.62253	2.19297
Solyc02g062650.2.1	1	0.13	0.54	1	1.16	0.34	0.0627585	2.38	2.66	0.0313931	2.86	3.28	"Laccase (AHRD V1 ***- Q9AUI0_PINTA); contains Interpro domain(s) IPR017761 Laccase "	1.61862	2.99944	8.63225	10.2075
Solyc02g062670.2.1	0.00349	4.8	4.75	0.0157652	6.95	4.84	0.32487	11.67	13.71	0.248863	13.82	11.63	"Tubby-like F-box protein 5 (AHRD V1 ***- TLP5_ORYSJ); contains Interpro domain(s) IPR000007 Tubby, C-terminal "	-3.48727	-2.92577	-1.45906	-1.49753
Solyc02g062780.2.1	0.36501	1.32	2.9	0.530825	7.97	6.45	0.00091	20.69	24.99	0.000356	23.24	21.94	"Chromodomain-helicase-DNA-binding protein 6 (AHRD V1 **-* CHD6_HUMAN); contains Interpro domain(s) IPR000330 SNF2-related "	-2.22121	1.43192	4.21224	4.04502
Solyc02g062890.1.1	0.344242	6.4	3.7	1	3.06	2.3	0.00768	12.78	10.23	2.62e-07	34.97	23.84	"Myo-inositol transporter 2 (AHRD V1 **** ITR2_SCHPO); contains Interpro domain(s) IPR003663 Sugar/inositol transporter "	1.76946	-1.07629	3.63017	8.94601
Solyc02g062910.1.1	0.00919	11.63	10.36	0.137267	17.66	15.75	0.199904	18.31	20.34	0.0629818	17.34	16.52	"Pentatricopeptide repeat-containing protein (AHRD V1 ***- D7MBF2_ARALY); contains Interpro domain(s) IPR002885 Pentatricopeptide repeat "	-2.60316	-1.77883	-1.63208	-1.9116
Solyc02g062960.2.1	0.0152749	24.21	32.86	0.136381	30.64	13.08	0.248362	19.09	17.78	0.111124	19.51	22.36	"Homeobox-leucine zipper protein (AHRD V1 *-*- Q9FXN8_ZINEL); contains Interpro domain(s) IPR001356 Homeobox "	2.84286	2.11385	1.69034	1.86393
Solyc02g063030.2.1	1.11e-05	17.61	23.38	0.021386	9.41	10.28	1	3.34	2.12	0.774826	3.51	4.06	LuxR family transcriptional regulator (Fragment) (AHRD V1 *-*- D9ZBL3_9CARY)	8.26148	3.88703	1.05497	1.40666
Solyc02g063250.2.1	6.53e-06	1.24	0.15	0.000207	1.96	1.32	0.000474	2.49	3.41	0.000133	3.29	2.99	"Peptide methionine sulfoxide reductase msrA (AHRD V1 *-** D7E9W5_METEZ); contains Interpro domain(s) IPR002569 Methionine sulphoxide reductase A "	-16.706	-8.02773	-4.86558	-4.70755
Solyc02g063350.1.1	0.451951	18.2	34.41	0.000155	86.63	100.45	0.041507	96.41	23.17	0.0228721	53.29	45.6	"Calmodulin (AHRD V1 ***- A8IDP6_CHLRE); contains Interpro domain(s) IPR011992 EF-Hand type "	1.38294	4.80056	2.91273	2.32527
Solyc02g063360.2.1	0.000345	14.74	8.15	0.00454	7.75	8.87	1	1.88	0.98	1	0.92	1.09	"C2 domain-containing protein (AHRD V1 **-- D7MIH2_ARALY); contains Interpro domain(s) IPR018029 C2 membrane targeting protein "	12.8482	9.05923	1.58928	1.13166
Solyc02g063370.2.1	3.76e-07	22.01	17.44	0.0123044	4.45	10.61	0.687887	2.31	1.95	0.687786	2.21	1.77	"C2 domain-containing protein (AHRD V1 **-- D7KD31_ARALY); contains Interpro domain(s) IPR018029 C2 membrane targeting protein "	18.3382	6.86753	1.91826	1.75407
Solyc02g063420.2.1	0.00585	25.39	34.71	1.41e-05	18.7	7.6	0.223381	22.08	78.96	0.232601	50.07	68.72	Hydroxyproline-rich glycoprotein (AHRD V1 **-- A9YWR1_MEDTR)	-2.62527	-6.1698	-1.72085	-1.48697
Solyc02g063430.2.1	0.000119	1.38	1.56	0.00246	4.73	1.05	1	5.14	25.71	0.166989	9.27	9.2	"BHLH transcription factor (AHRD V1 **** A9YWR2_MEDTR); contains Interpro domain(s) IPR011598 Helix-loop-helix DNA-binding "	-9.03613	-4.9373	-1.01956	-1.73519
Solyc02g063440.2.1	0.00427	25.18	46.18	0.00714	30.7	42.11	0.488067	20.6	12.92	0.45046	21.46	13	Unknown Protein (AHRD V1)	3.1109	3.11391	1.35787	1.35321
Solyc02g063450.2.1	4.3e-06	212.5	190.27	0.0320295	80.16	96.19	0.9472	37.9	53.38	0.752195	42.54	57.6	"Hypothetical YFW family protein 5 (AHRD V1 *--- Q5AP84_CANAL); contains Interpro domain(s) IPR009836 Protein of unknown function DUF1399 "	5.07644	2.15363	1.04745	1.123
Solyc02g063480.2.1	4.12e-06	0.16	1.38	0.0179946	11.33	2.15	0.172229	81.89	54.82	0.299954	43.42	71.52	"Xylanase inhibitor (Fragment) (AHRD V1 **-- Q53IQ4_WHEAT); contains Interpro domain(s) IPR001461 Peptidase A1 "	-34.3039	-4.66256	2.04327	1.67377
Solyc02g063520.2.1	0.320562	17.91	11.21	0.288752	10.34	21.59	0.391535	11.12	3.26	0.0374951	4.74	4.53	"Homeobox-leucine zipper protein 22 (AHRD V1 ***- D7MA03_ARALY); contains Interpro domain(s) IPR003106 Leucine zipper, homeobox-associated "	1.49985	1.59303	-1.46595	-2.32305
Solyc02g064640.2.1	0.0334919	9.91	6.06	0.124485	9.88	4	0.0937731	6.64	6.27	0.0784482	5.59	6.9	"ADP-RIBOSYLATION FACTOR-like protein (AHRD V1 ***- Q8VY57_ARATH); contains Interpro domain(s) IPR006688 ADP-ribosylation factor "	4.17885	3.4854	3.10863	2.9359
Solyc02g064680.2.1	0.391666	306.54	177.05	0.0127412	603.94	363.97	0.678631	265.17	33.67	0.221386	111.9	142.68	"Calcium-transporting ATPase 1 (AHRD V1 ***- Q7XBH9_CERRI); contains Interpro domain(s) IPR006408 ATPase, P-type, calcium-transporting, PMCA-type "	1.39895	2.66381	-1.26499	-1.54218
Solyc02g064690.2.1	1.52e-10	31.49	27.62	1.1e-05	8.12	18.98	1	0.5	0.84	0.250229	2.06	0.7	"Acetyltransferase-like protein (AHRD V1 ***- Q7EYF5_ORYSJ); contains Interpro domain(s) IPR000182 GCN5-related N-acetyltransferase "	90.9374	41.0442	2.28533	4.21672
Solyc02g064830.2.1	5.41e-06	1.84	1.01	0.278743	17.67	3.76	9.29e-06	4.12	0.69	0.000439	8.1	0.78	"Indole-3-acetic acid-amido synthetase GH3.8 (AHRD V1 **** B6U4E2_MAIZE); contains Interpro domain(s) IPR004993 GH3 auxin-responsive promoter "	-11.3015	-1.68512	-7.55916	-4.33293
Solyc02g064940.1.1	1	1.77	2.59	0.747279	2.1	0.94	1.28e-05	18.47	30.61	2.47e-07	36.9	24.03	LRR receptor-like serine/threonine-protein kinase, RLP	-1.25067	-1.8054	7.80554	9.42241
Solyc02g064950.2.1	0.268718	18.02	11.18	0.339647	20.09	12.84	0.0098	10.22	8.8	0.0054	9.04	10.22	"CBS domain-containing protein-like (AHRD V1 ***- B8AP73_ORYSI); contains Interpro domain(s) IPR000644 Cystathionine beta-synthase, core "	-1.56805	-1.44913	-2.63313	-2.67158
Solyc02g064970.2.1	0.000144	363.97	450.66	0.572328	45.61	166.05	3.06e-05	4.14	13.92	0.00404	20.86	28.59	"Peroxidase (AHRD V1 **** Q43499_SOLLC); contains Interpro domain(s) IPR002016 Haem peroxidase, plant/fungal/bacterial "	5.22575	1.33899	-9.34227	-3.507
Solyc02g064980.1.1	0.0978756	107.44	60.14	0.011815	109.93	145.32	0.12416	29.86	1.48	0.0121158	19.65	6.35	"Protein serine/threonine kinase (AHRD V1 ***- D3BP85_POLPA); contains Interpro domain(s) IPR002290 Serine/threonine protein kinase "	2.13784	3.12609	-2.72085	-3.43414
Solyc02g065000.1.1	0.0487192	17.79	6.93	0.702101	4.89	6.29	0.144352	12.86	7.22	1	6.03	4.12	"Calmodulin-like protein (AHRD V1 ***- Q67TZ4_ORYSJ); contains Interpro domain(s) IPR011992 EF-Hand type "	2.96524	1.30529	2.19551	1.09606
Solyc02g065010.1.1	0.495862	8.49	7.54	0.852064	6.01	19.7	0.310646	5.4	9.91	0.00104	3.88	2.47	"EF hand family protein (AHRD V1 ***- B6UAJ2_MAIZE); contains Interpro domain(s) IPR011992 EF-Hand type "	-1.38233	1.12773	-1.58369	-3.83181
Solyc02g065050.1.1	7.18e-07	2.55	1.64	5.22e-05	4.02	3.05	0.000298	5.36	6.52	0.000346	7	7.52	"Aspartic proteinase nepenthesin I (AHRD V1 **-- A9ZMF9_NEPAL); contains Interpro domain(s) IPR001461 Peptidase A1 "	-10.8893	-6.81676	-4.36068	-3.67752
Solyc02g065070.2.1	0.00117	23.29	22.07	0.0370208	12.53	19.24	0.147617	11.57	14.31	0.157224	14.16	11.22	"Calcium-dependent protein kinase-like (AHRD V1 **** Q9LET1_ARATH); contains Interpro domain(s) IPR002290 Serine/threonine protein kinase "	3.57819	2.43883	1.87262	1.78743
Solyc02g065090.2.1	0.168869	11.15	5.21	0.109788	8.49	6.99	0.000663	68.36	58.23	0.00552	71.17	31.99	"Patatin-like protein 3 (AHRD V1 ***- Q9FZ08_TOBAC); contains Interpro domain(s) IPR002641 Patatin "	-1.82837	-2.00363	3.79775	2.98646
Solyc02g065170.2.1	0.168506	2.02	37.18	0.0927431	26.34	9.38	0.00112	62.89	20.95	6.51e-05	33.36	48	"Laccase-22 (AHRD V1 **-- LAC22_ORYSJ); contains Interpro domain(s) IPR001117 Multicopper oxidase, type 1 "	2.48747	2.25905	5.05481	4.75911
Solyc02g065190.2.1	9.76e-06	0.76	3.83	0.000276	6.21	2.28	0.0366907	69.12	141.77	0.327449	47.2	72.35	Cytochrome P450	-14.4298	-8.22308	2.76534	1.54063
Solyc02g065240.2.1	0.00334	0.29	1.57	0.0116821	1.43	1.71	0.82847	6.17	18	0.439596	7.01	6.86	"Hydrolase alpha/beta fold family protein (AHRD V1 **-- D7LG04_ARALY); contains Interpro domain(s) IPR000073 Alpha/beta hydrolase fold-1 "	-8.98658	-5.7367	1.17457	-1.49701
Solyc02g065380.2.1	0.0235044	19.49	44.68	0.279942	52.13	51.14	0.748149	75.65	66.53	0.644764	73.35	69.29	"Cold acclimation protein COR413-like (AHRD V1 ***- A6YDU6_LOLTE); contains Interpro domain(s) IPR008892 Cold acclimation WCOR413 "	-2.31221	-1.46607	-1.12911	-1.15918
Solyc02g065390.1.1	0.478748	0	1.93	0.031931	3.37	21.05	0.727014	1.69	1.86	0.219179	0.88	0.46	Unknown Protein (AHRD V1)	-2.33278	4.742	-1.45208	-3.54189
Solyc02g065430.1.1	0.500195	0.9	0.99	1	0.65	0	0.0079	4.52	4.42	0.00395	5.07	4.58	TMV response-related protein (AHRD V1 **-- B6UG28_MAIZE)	8.30422	3.50612	34.281	36.4663
Solyc02g065470.1.1	2.14e-11	9.99	13.6	3.3e-08	25.05	15.72	0.00593	65.89	79.97	0.00107	53.19	81.71	"Pathogenesis-related protein (AHRD V1 ***- B3TLW3_ELAGV); contains Interpro domain(s) IPR001283 Allergen V5/Tpx-1 related "	-15.9294	-9.55794	-2.84015	-3.13841
Solyc02g065520.1.1	0.00139	12.01	11.54	0.325203	3.4	6.38	1	2.11	3.28	1	2.51	2.24	"Receptor-like protein kinase 5 (AHRD V1 *-*- RLK5_ARATH); contains Interpro domain(s) IPR002290 Serine/threonine protein kinase "	5.96431	2.44119	1.3021	1.12362
Solyc02g065570.1.1	0.0112357	2.69	5.91	1	0	0	0.0426333	7.39	0	0.250229	1.34	2.19	"DVL1 (AHRD V1 **-- Q6X5V0_ARATH); contains Interpro domain(s) IPR012552 DVL "	34.2945	1	28.775	13.9667
Solyc02g065590.2.1	0.0201321	1.33	2.59	0.0121818	2.89	0	0.595606	4.18	10.86	0.375689	5.75	8.51	"Alpha/beta hydrolase fold-3 (AHRD V1 *--- C8PY72_9GAMM); contains Interpro domain(s) IPR002018 Carboxylesterase, type B "	-4.6165	-6.34921	-1.37924	-1.48234
Solyc02g065610.2.1	0.0154218	13.36	11.31	0.0810537	18.16	14.02	7.75e-06	5.79	2.8	0.000603	12.07	6.7	"Leaf senescence protein-like (AHRD V1 ***- Q8RV74_ORYSJ); contains Interpro domain(s) IPR004253 Protein of unknown function DUF231, plant "	-2.5948	-2.06678	-8.00019	-3.84165
Solyc02g065650.1.1	0.0719749	16.38	27.14	0.0362456	19.19	19.25	0.00497	14.41	15.67	0.00249	17.48	14.35	"RING finger protein 13 (AHRD V1 *--- RNF13_BOVIN); contains Interpro domain(s) IPR018957 Zinc finger, C3HC4 RING-type "	-1.99994	-2.31792	-3.13786	-3.05108
Solyc02g065680.2.1	0.000419	84.9	105.43	0.302685	47.94	35.49	0.557231	29.75	47.48	0.390332	37.03	46.59	"Amino acid transporter (AHRD V1 ***- B9N1V7_POPTR); contains Interpro domain(s) IPR013057 Amino acid transporter, transmembrane "	3.44911	1.4683	1.28108	1.3566
Solyc02g066800.1.1	0.0368288	7.75	9.48	0.000536	6.62	0	0.506461	26.79	29.64	0.113675	10.33	14.58	Unknown Protein (AHRD V1)	-2.25624	-5.95313	1.31352	-1.75824
Solyc02g066820.1.1	0.00511	4.19	4.73	0.0126727	2.95	5.15	0.500207	0.96	1.71	1	0.27	0.84	Unknown Protein (AHRD V1)	16.7174	14.8991	4.99827	2.307
Solyc02g066930.2.1	0.0550995	7.85	9.7	0.0239958	13.81	8.18	0.0165741	12.29	8.96	0.00422	13.01	12.68	"RNA-binding protein (AHRD V1 *--* Q941H9_TOBAC); contains Interpro domain(s) IPR015465 RNA recognition motif, glycine rich protein "	2.80653	3.39747	3.10882	3.6443
Solyc02g066960.2.1	0.0345511	1.93	16.29	0.00614	6.97	12.52	1	1.2	0.88	1	0.96	1.25	"UDP-glycosyltransferase (AHRD V1 **** D7KLQ4_ARALY); contains Interpro domain(s) IPR002213 UDP-glucuronosyl/UDP-glucosyltransferase "	5.02125	5.32782	-1.6878	-1.6414
Solyc02g067020.1.1	5.21e-05	12.83	13.18	0.0184014	3.66	11.64	0.500207	0.02	0	0.500152	0.3	0.11	"Ethylene-responsive transcription factor 4 (AHRD V1 *-*- B6TYT8_MAIZE); contains Interpro domain(s) IPR001471 Pathogenesis-related transcriptional factor and ERF, DNA-binding "	11.7558	6.77434	-8.38853	-3.6605
Solyc02g067090.2.1	0.0325908	28.15	22.51	0.0462112	25.12	27.44	0.400965	16.62	17.55	0.331152	19.54	17.83	Unknown Protein (AHRD V1)	2.20307	2.20994	1.35714	1.44217
Solyc02g067100.2.1	0.204151	0	0.64	0.811763	2.95	0.79	0.0337782	11.47	11.21	0.0079	14.26	11.57	"Targeting protein for Xklp2 containing protein expressed (AHRD V1 *-*- Q10Q22_ORYSJ); contains Interpro domain(s) IPR009675 Targeting for Xklp2 "	-7.72874	-1.7814	3.00816	3.3162
Solyc02g067190.2.1	1	0	0.61	0.00511	12.01	3.56	0.0450219	6.08	2.26	0.0118502	7.33	3.88	"UPF0497 membrane protein 2 (AHRD V1 ***- U4972_MAIZE); contains Interpro domain(s) IPR006459 Uncharacterised protein family UPF0497, trans-membrane plant subgroup "	-1.38206	12.7613	6.61717	8.59858
Solyc02g067230.2.1	0.0402475	2.02	1.61	0.0206413	1.45	1.05	0.57938	4.93	5.39	0.42454	5.5	4.86	"Dof zinc finger protein (AHRD V1 ***- C4B6D7_IPOBA); contains Interpro domain(s) IPR003851 Zinc finger, Dof-type "	-3.5567	-5.16507	-1.43342	-1.47229
Solyc02g067250.1.1	0.552266	27.27	21.89	0.713949	18.04	30.12	0.0520672	11.79	9.2	0.0102278	9.31	8.51	"Structural constituent of ribosome (AHRD V1 **-- D7LAI5_ARALY); contains Interpro domain(s) IPR008195 Ribosomal protein L34e "	1.24734	1.18501	-2.04421	-2.4691
Solyc02g067410.1.1	0.726254	2.49	24.74	1	15.56	21.56	0.00281	1.62	3.3	0.0579003	8.81	3.17	"Homeobox-leucine zipper-like protein (AHRD V1 *-*- Q3HRT1_PICGL); contains Interpro domain(s) IPR001356 Homeobox "	-1.3369	1.01581	-7.57226	-3.30721
Solyc02g067430.2.1	0.154321	7.63	10.58	0.862807	13.74	16.81	0.000562	5.47	2.76	0.021077	8.81	6.8	"WRKY transcription factor 73 (AHRD V1 *-*- Q6IEK8_ORYSI); contains Interpro domain(s) IPR003657 DNA-binding WRKY "	-1.7794	-1.0974	-4.21669	-2.3217
Solyc02g067440.2.1	1.03e-05	1.18	1.02	0.00773	10.68	8.33	0.476973	4.82	69.19	0.0825304	16.45	27.41	"Cupin RmlC-type (AHRD V1 **-- B4F886_MAIZE); contains Interpro domain(s) IPR012864 Protein of unknown function DUF1637 "	-48.3896	-6.38954	-1.78002	-3.02241
Solyc02g067470.2.1	0.0415609	15.04	12.64	0.159042	10.23	12.63	0.192568	11.66	9.37	0.180431	11.95	10.68	"SPFH domain / Band 7 family protein (AHRD V1 **-- Q6L4B0_SOLDE); contains Interpro domain(s) IPR001107 Band 7 protein "	2.48343	1.99044	1.72995	1.80976
Solyc02g067530.2.1	0.00289	8.44	13.77	0.317615	26.91	19.11	0.705432	47.62	36.34	0.964036	38.12	37.95	"Prolyl 4-hydroxylase alpha subunit-like protein (AHRD V1 ***- Q9LSI6_ARATH); contains Interpro domain(s) IPR006620 Prolyl 4-hydroxylase, alpha subunit "	-2.95447	-1.47686	1.16723	1.02694
Solyc02g067580.2.1	0.00477	26.47	41.74	0.0925475	62.65	45.95	0.0240649	138.08	500.83	0.355181	154.65	150.81	"B12D-like protein (AHRD V1 ***- D2XQY6_WOLAR); contains Interpro domain(s) IPR010530 B12D "	-2.92237	-1.8891	2.91115	1.36658
Solyc02g067600.1.1	6.08e-06	113.37	143.73	1.91e-09	68.88	56.75	9.25e-08	46.37	91.96	2.78e-12	61.47	41.07	Unknown Protein (AHRD V1)	-5.09312	-10.7238	-10.3689	-14.3503
Solyc02g067610.1.1	0.00925	360.67	483.75	0.0127857	564.48	233.08	6.56e-06	153.08	205.86	4.24e-08	177.87	123.07	Unknown Protein (AHRD V1)	-2.61502	-2.8706	-6.71382	-8.24384
Solyc02g067700.1.1	0.498574	8.01	6.46	0.26047	8.64	2.56	0.0309398	25.58	30.67	0.380233	17.48	16.49	"RING finger protein (AHRD V1 *-*- C6EUD3_SOYBN); contains Interpro domain(s) IPR018957 Zinc finger, C3HC4 RING-type "	-1.44111	-1.92966	2.42471	1.43445
Solyc02g067750.2.1	0.000995	0	0	0.0014	0	0	0.0135173	2.4	0.07	0.0245448	0.58	2.38	"Carbonic anhydrase (AHRD V1 ***- B1VK36_SOLLC); contains Interpro domain(s) IPR001765 Carbonic anhydrase "	-55.9394	-56.9129	-5.73493	-4.96831
Solyc02g067800.2.1	2.85e-06	13.53	18.27	8.86e-05	24.3	22.61	0.0028	28.36	45.91	0.00063	36.99	36.66	"LOB domain protein 1 (AHRD V1 ***- B2KKZ3_ORYSJ); contains Interpro domain(s) IPR004883 Lateral organ boundaries, LOB "	-7.78183	-5.44049	-3.66381	-3.78409
Solyc02g067810.1.1	2.54e-07	5.48	1.91	9.82e-09	3.58	0	4.21e-05	8.2	7.13	0.000303	10.86	12.36	Genomic DNA chromosome 5 TAC clone K21I16 (AHRD V1 ***- Q9FI64_ARATH)	-10.672	-22.156	-5.75537	-3.92646
Solyc02g067840.2.1	0.253192	60.27	54.42	0.348278	64.1	62.96	0.00504	37.74	26.84	0.00265	38.13	34.56	"Sucrase/ferredoxin domain protein (AHRD V1 *--- A1CK27_ASPCL); contains Interpro domain(s) IPR009737 Sucraseferredoxin-like "	-1.48091	-1.38341	-2.87466	-2.63534
Solyc02g067930.2.1	1.65e-10	47.41	44.24	0.000851	11.92	17.56	0.0887854	5.99	6.33	0.0784482	8.13	5.35	"Glycerol-3-phosphate dehydrogenase (AHRD V1 **** B4FZV9_MAIZE); contains Interpro domain(s) IPR017751 NAD-dependent glycerol-3-phosphate dehydrogenase, eukaryotic "	23.8418	7.49141	2.97421	3.1583
Solyc02g068010.2.1	0.158267	17.29	16.57	0.143979	13.32	19.41	0.00635	13.17	8.48	0.0253839	13.92	15.96	"DNA-binding protein (Fragment) (AHRD V1 *-*- Q5IRD2_9ROSI); contains Interpro domain(s) IPR006634 TRAM, LAG1 and CLN8 homology "	-1.65484	-1.76234	-2.81644	-2.10794
Solyc02g068030.1.1	1	29.73	16.98	0.249721	29.59	45.96	0.0600688	16.03	7.4	0.0160748	12.34	9.41	Unknown Protein (AHRD V1)	1.01805	1.58519	-2.14228	-2.37758
Solyc02g068040.2.1	0.203212	6.57	7.23	0.0491756	7.21	0	3.67e-05	1.36	1.16	1.28e-05	1.92	0.96	Unknown Protein (AHRD V1)	-1.70347	-3.32636	-9.41174	-8.58498
Solyc02g068090.2.1	0.087496	10.79	14.28	0.200051	11.15	11.24	0.0452811	12.31	17.88	0.112673	13.13	11.89	"30S ribosomal protein S21, chloroplastic (Fragment) (AHRD V1 *--- RR21_SPIOL); contains Interpro domain(s) IPR001911 Ribosomal protein S21 "	2.12321	1.84754	2.33605	1.88567
Solyc02g068120.2.1	0.00406	16.42	13.65	0.0361177	28.45	12.3	0.537041	37.85	43.07	0.621014	43.17	45.38	"Gda-1 (AHRD V1 **-- B6TDG4_MAIZE); contains Interpro domain(s) IPR013089 Kelch related "	-3.10691	-2.39539	-1.27556	-1.1964
Solyc02g068170.1.1	0.00016	24.6	12.63	0.0759682	8.25	7.86	0.781195	2.11	5.5	0.774826	3.28	3.91	Unknown Protein (AHRD V1)	7.9237	3.32734	1.51268	1.39686
Solyc02g068240.2.1	0.0367463	22.61	19.43	0.382038	16.56	11.81	1	8.82	11.41	1	9.65	10.42	"Diacylglycerol acyltransferase family (AHRD V1 **** D7LTV7_ARALY); contains Interpro domain(s) IPR007130 Diacylglycerol acyltransferase "	2.33485	1.52455	1.03257	-1.00095
Solyc02g068260.1.1	1.26e-12	28.95	43.11	0.0154731	2.49	6.21	0.500207	0.74	1.29	0.250229	1.38	1.61	"Integral membrane protein (AHRD V1 *-*- B6U6B5_MAIZE); contains Interpro domain(s) IPR008217 Protein of unknown function DUF125, transmembrane "	208.446	25.5514	6.27772	8.78238
Solyc02g068280.2.1	0.119141	10.71	8.01	0.286533	9.5	6.46	0.0015	15.62	20.89	0.00634	15.09	14.1	"Subtilisin-like serine protease (AHRD V1 **-* C3VDI0_CARPA); contains Interpro domain(s) IPR015500 Peptidase S8, subtilisin-related "	2.18501	1.80412	3.86334	3.01422
Solyc02g068320.2.1	0.0164684	11.17	10.88	0.248759	8.98	5.1	0.192806	7.87	6.14	0.0244635	9.57	9.83	"2-oxoglutarate-dependent dioxygenase (AHRD V1 **-- B9GJL0_POPTR); contains Interpro domain(s) IPR005123 Oxoglutarate and iron-dependent oxygenase "	3.46883	2.1619	2.02932	2.71465
Solyc02g068390.2.1	0.546584	9.02	10.26	0.268674	9.08	15.5	0.0568684	13.88	20.44	0.0465642	17.78	15.33	"Mitochondrial inner membrane protease subunit 1 (AHRD V1 **-- B6T7U7_MAIZE); contains Interpro domain(s) IPR000223 Peptidase S26A, signal peptidase I "	1.34848	1.6687	2.18156	2.05106
Solyc02g068400.2.1	0.0144613	8.1	4.79	0.0147279	6.84	6.96	0.0239184	7.3	6.24	0.0077	8.92	7.05	"AT4G20050-like protein (Fragment) (AHRD V1 *-*- D6PQZ2_9BRAS); contains Interpro domain(s) IPR011050 Pectin lyase fold/virulence factor "	5.05187	5.23025	4.85837	5.56447
Solyc02g068430.2.1	0.000365	139.31	116.1	0.0151046	199.62	208.56	6.92e-05	110.38	99.31	3.21e-06	104.09	95.47	"Choline-phosphate cytidylyltransferase B (AHRD V1 **** B4F7T8_MAIZE); contains Interpro domain(s) IPR004820 Cytidylyltransferase "	-3.90087	-2.52986	-5.22044	-5.64962
Solyc02g068460.1.1	0.615535	49.25	36.44	0.544688	50.48	85.06	7.97e-05	14.36	5.88	2.06e-06	12.18	6.93	"Unknown Protein (AHRD V1); contains Interpro domain(s) IPR008889 VQ "	-1.20476	1.27057	-5.53824	-6.06634
Solyc02g068470.1.1	0.900503	13.52	8.37	0.15369	12.52	25.26	0.00451	3.18	1.24	0.0028	2.49	1.99	Unknown Protein (AHRD V1)	1.13805	1.89578	-4.55288	-4.62034
Solyc02g068660.1.1	0.0593541	17.13	16.46	0.706407	10.49	9.98	0.0474172	3.1	1.93	0.0691796	3.09	3.34	"Receptor-like protein kinase At3g21340 (AHRD V1 *-** RLK6_ARATH); contains Interpro domain(s) IPR002290 Serine/threonine protein kinase "	2.13062	1.26186	-3.28101	-2.66221
Solyc02g068680.1.1	0.0187947	37.06	20.33	0.433018	66.52	52.12	0.0256898	43.01	6.85	6.38e-05	16.59	18.15	"CHP-rich zinc finger protein-like (AHRD V1 **-- Q9FK70_ARATH); contains Interpro domain(s) IPR011424 C1-like "	-2.7103	-1.37432	-3.41442	-5.0726
Solyc02g068870.1.1	0.452055	4.83	8.87	0.376938	5.89	6.44	0.213284	1.85	9.24	0.0334455	7.38	0.47	Unknown Protein (AHRD V1)	-1.40992	-1.60576	-1.89445	-2.72411
Solyc02g068900.2.1	0.206393	58.74	109.2	0.0420722	68.86	63.74	0.0309106	346.18	276.08	0.599938	191.94	152.66	"Glutathione transferase (AHRD V1 **** Q2KKB6_THLCA); contains Interpro domain(s) IPR016639 Glutathione S-transferase, predicted "	-1.5579	-2.01421	2.19843	1.17941
Solyc02g068910.2.1	0.0256746	15.73	16.91	0.156099	14.91	11.26	0.104103	14.78	13.78	0.113561	12.12	16.5	"Peptidase trypsin-like serine and cysteine proteases (Fragment) (AHRD V1 ***- A2Q138_MEDTR); contains Interpro domain(s) IPR009003 Peptidase, trypsin-like serine and cysteine "	2.40668	1.87286	1.92915	1.8821
Solyc02g068920.2.1	0.0106752	69.19	75.21	1	27.04	35	0.863584	28.08	42.58	0.711375	31.96	25.82	"Lecithin cholesterol acyltransferase (AHRD V1 ***- A2Q294_MEDTR); contains Interpro domain(s) IPR003386 Lecithin:cholesterol acyltransferase "	2.41916	1.01319	1.08146	-1.16057
Solyc02g069060.2.1	1.91e-09	7.1	4.19	8.89e-06	16.94	8.65	2.45e-09	6.02	5.1	2.29e-10	5.51	7.7	Phloem lectin (AHRD V1 --*- Q8LK67_9ROSI)	-12.9065	-5.99909	-14.3864	-12.4783
Solyc02g069130.2.1	0.0185938	3.8	2.98	0.0778624	4.05	1.44	0.0627585	2.41	2.55	0.375381	2.56	1.81	"Peptidyl-prolyl cis-trans isomerase (AHRD V1 *-*- B1WW43_CYAA5); contains Interpro domain(s) IPR001179 Peptidyl-prolyl cis-trans isomerase, FKBP-type "	10.5742	8.40519	7.30351	6.34864
Solyc02g069170.1.1	0.0473471	2.34	2.68	0.103757	2.23	3.89	0.0692675	3.29	3.7	0.03903	4.3	2.32	"Os12g0574800 protein (Fragment) (AHRD V1 *-*- Q0IME3_ORYSJ); contains Interpro domain(s) IPR006565 Bromodomain transcription factor "	-3.14941	-2.68432	-2.50238	-2.70187
Solyc02g069180.2.1	5.8e-06	4.35	6.58	0.000879	10.33	7.93	0.125959	18.48	22.15	0.0482167	20.59	17.24	Protein binding protein (AHRD V1 **-- D7L0L7_ARALY)	-5.9922	-3.73005	-1.79025	-1.97667
Solyc02g069230.2.1	0.0369494	20.19	20.52	0.313523	15.93	13.75	0.206549	16.28	16.76	0.100525	18.78	17.88	"IBR finger domain-containing protein (AHRD V1 *--- C1GML6_PARBD); contains Interpro domain(s) IPR002867 Zinc finger, C6HC-type "	2.1742	1.53974	1.61504	1.74071
Solyc02g069250.2.1	0.694838	1.56	0.69	1	2.23	1.5	0.186577	9.19	3.26	0.000782	14.8	11.39	"Cinnamyl alcohol dehydrogenase-like protein (AHRD V1 **** A9PHZ1_POPTR); contains Interpro domain(s) IPR002085 Alcohol dehydrogenase superfamily, zinc-containing "	-1.94932	-1.26391	2.3845	4.8149
Solyc02g069290.2.1	4.85e-06	19.03	25.54	0.0287678	8.58	10.49	0.231989	4.08	8.08	0.14584	4.49	8.03	"Transducin-like (AHRD V1 **-- Q6H6D6_ORYSJ); contains Interpro domain(s) IPR011989 Armadillo-like helical "	8.69404	3.64961	2.21245	2.22001
Solyc02g069310.2.1	6.19e-05	29.02	20.68	0.00177	43.26	31.25	0.00159	44.93	27.63	0.000403	37.12	40.56	"NPR1-2 protein (Fragment) (AHRD V1 ***- B8XQT6_SOYBN); contains Interpro domain(s) IPR013069 BTB/POZ "	-4.80379	-3.34303	-3.61736	-3.48327
Solyc02g069350.2.1	0.0186643	8.63	19.01	0.286703	21.44	23.91	0.268087	22.23	24.06	0.37344	24.63	28.91	"Transmembrane protein 56 (AHRD V1 ***- B6TI82_MAIZE); contains Interpro domain(s) IPR006634 TRAM, LAG1 and CLN8 homology "	-2.37998	-1.4879	-1.54831	-1.3751
Solyc02g069370.2.1	0.223747	94.63	124.01	0.0388634	85.79	78.21	0.112804	92.34	108.82	0.11009	111.49	110.78	"Ras-related protein Rab-5C (AHRD V1 ***- C1C0G6_9MAXI); contains Interpro domain(s) IPR015599 Rab5-related "	-1.51058	-2.06984	-1.79158	-1.6649
Solyc02g069420.2.1	1.99e-10	71.37	71.9	0.000147	19.35	31.41	0.111932	1.5	0.58	0.815037	5.81	4.81	"Phospholipid-translocating P-type ATPase flippase family protein (AHRD V1 **** A2DBI9_TRIVA); contains Interpro domain(s) IPR006539 ATPase, P-type, phospholipid-translocating, flippase "	18.048	6.2411	-3.73079	1.21242
Solyc02g069430.2.1	1.39e-09	85.27	81.57	0.000382	24.52	36.74	0.0319558	1.7	1.41	0.845626	5.93	5.84	"Phospholipid-transporting ATPase (AHRD V1 **** C1HB29_PARBA); contains Interpro domain(s) IPR001757 ATPase, P-type, K/Mg/Cd/Cu/Zn/Na/Ca/Na/H-transporter "	13.0096	4.65214	-4.18495	-1.20971
Solyc02g069470.2.1	0.0674108	15.37	17.7	0.0369547	15.9	13.95	0.00494	9.27	13.71	0.0012	10.63	11.75	"Inter-alpha-trypsin inhibitor heavy chain H3 (AHRD V1 *--- ITIH3_MESAU); contains Interpro domain(s) IPR002035 von Willebrand factor, type A "	-2.006	-2.29073	-3.14919	-3.31224
Solyc02g069490.2.1	0.0128422	14.45	49.08	0.374314	147.78	103.05	0.278156	132.31	94.95	0.720154	178.45	226.09	"FAD linked oxidase domain protein (AHRD V1 **-- D1VPW7_9ACTO); contains Interpro domain(s) IPR006094 FAD linked oxidase, N-terminal "	-7.4559	-1.92068	-2.23274	-1.29059
Solyc02g069550.1.1	1.57e-13	49.5	71.49	9.84e-06	13.31	14.88	1	0.31	0.1	0.625229	2.5	1.1	Prune homolog 2 (AHRD V1 *-*- D6RTK6_HUMAN)	95.7383	21.9912	-1.99586	2.77371
Solyc02g069560.2.1	1	0.53	0.24	0.636031	1.94	1.32	0.0233853	6.6	5.34	0.00427	8.27	7.26	"Chloroplast unusual positioning 1A (AHRD V1 *--- A2V813_PHYPA); contains Interpro domain(s) IPR015425 Actin-binding FH2 "	-1.63141	2.03789	6.68999	8.43959
Solyc02g069600.2.1	0.0061	32.05	25.97	0.390268	9.99	20.75	0.022116	4.09	3.42	0.00741	2.12	4.27	Cytochrome P450	2.83083	1.46124	-2.90218	-3.47496
Solyc02g069630.2.1	0.0751324	12.76	13.55	0.379054	10.72	9.35	0.00148	25.47	20.17	0.00171	19.75	24.45	"Subtilisin-like serine protease (AHRD V1 **-* Q948Q4_ARATH); contains Interpro domain(s) IPR015500 Peptidase S8, subtilisin-related "	2.19216	1.62655	3.46966	3.26651
Solyc02g069670.2.1	0.0083	8.14	7.81	0.0556691	5.74	6.7	0.390434	4.62	4.19	0.388578	4.22	4.36	"Alpha-glucosidase 1 (AHRD V1 **** O22444_ARATH); contains Interpro domain(s) IPR000322 Glycoside hydrolase, family 31 "	4.37066	3.32642	2.24369	2.1291
Solyc02g069680.2.1	0.0506458	2.29	5.38	0.57735	16.19	16.86	0.00283	48.92	53.97	0.00151	57.06	44.58	"Charged multivesicular body protein 2a (AHRD V1 ***- B6TQT7_MAIZE); contains Interpro domain(s) IPR005024 Snf7 "	-3.11624	1.31338	3.83388	3.67246
Solyc02g069730.2.1	0.160475	7.48	17.64	0.396959	16.61	4.74	3.09e-06	57.21	47.14	2.57e-08	63.6	66.53	"UPF0497 membrane protein 15 (AHRD V1 ***- U497F_RICCO); contains Interpro domain(s) IPR006459 Uncharacterised protein family UPF0497, trans-membrane plant subgroup "	2.10242	1.73304	7.9961	9.69767
Solyc02g069740.2.1	0.0268073	0.67	0.66	0.0904208	1.88	0	0.0668086	1.32	1	0.0929241	1.57	1.79	"Lysine-specific demethylase 5B (AHRD V1 *--- KDM5B_MOUSE); contains Interpro domain(s) IPR013129 Transcription factor jumonji "	-6.07687	-4.65138	-4.06195	-2.97521
Solyc02g069830.2.1	0.479329	7.47	8.1	0.747696	9.57	4.65	0.00436	16.76	20.72	0.00924	15.25	17.04	"Class III homeodomain-leucine zipper (AHRD V1 ***- Q1WD30_GINBI); contains Interpro domain(s) IPR013978 MEKHLA "	1.44307	1.27413	3.14633	2.64553
Solyc02g069880.2.1	0.00925	7.27	6.77	0.00784	9.39	3.69	0.254698	12.39	17.11	0.262611	12.79	17.38	"E3 ubiquitin-protein ligase sina (AHRD V1 **-* B0WR23_CULQU); contains Interpro domain(s) IPR004162 Seven in absentia protein "	-2.88198	-3.20411	-1.51879	-1.52146
Solyc02g069910.1.1	0.00114	53.76	15.96	4.59e-07	52.9	83.87	0.00778	43.57	13.1	0.00765	15.14	30.07	Unknown Protein (AHRD V1)	5.28606	9.89199	3.88298	3.01816
Solyc02g070000.2.1	1	2.49	3.18	0.434654	4.79	3.79	0.00723	10.55	8.75	0.000425	13.55	10.89	Receptor like kinase, RLK	1.44034	2.08931	4.35885	5.35063
Solyc02g070020.1.1	0.714911	51.3	44.9	0.897976	57.56	51.07	0.00992	26.47	15.25	0.000125	16.83	12.83	"UDP-glucosyltransferase (AHRD V1 **-* Q8LKG3_STERE); contains Interpro domain(s) IPR002213 UDP-glucuronosyl/UDP-glucosyltransferase "	-1.15168	-1.05741	-2.89618	-4.19872
Solyc02g070040.1.1	0.000471	89.47	83.73	0.0063	56.25	74.88	0.413916	44.3	14.27	1	24.95	13.51	Ethylene-responsive nuclear protein (AHRD V1 *-*- Q38MV1_SOLLC)	5.03924	3.70109	1.56721	-1.00675
Solyc02g070060.1.1	0.00164	4.57	6.86	0.0441873	1.57	4.15	1	0.06	0	1	0.26	0.12	"FAD-binding domain-containing protein (AHRD V1 **-- D7MFH6_ARALY); contains Interpro domain(s) IPR006094 FAD linked oxidase, N-terminal "	25.8743	13.0057	-1.46512	1.331
Solyc02g070090.1.1	1.59e-07	3.53	4.6	5.02e-06	3.18	6.96	0.0475956	15.52	23.44	0.0178649	15.14	22.18	"FAD-binding domain-containing protein (AHRD V1 **-- D7KFN2_ARALY); contains Interpro domain(s) IPR006094 FAD linked oxidase, N-terminal "	-9.2562	-7.67053	-2.1685	-2.31565
Solyc02g070110.1.1	0.0273005	1.03	0	0.416919	5.75	0	0.461164	3.36	2.96	0.455613	4.73	2.04	"FAD-binding domain-containing protein (AHRD V1 **-- D7MFH6_ARALY); contains Interpro domain(s) IPR006094 FAD linked oxidase, N-terminal "	-7.70538	-1.71513	-1.64982	-1.58771
Solyc02g070130.1.1	0.0748348	2.31	0.85	0.035989	0.33	1.64	0.6868	7.17	2.76	0.239178	2.78	3.82	"FAD-binding domain-containing protein (AHRD V1 **-- D7MFI0_ARALY); contains Interpro domain(s) IPR006094 FAD linked oxidase, N-terminal "	-3.42083	-5.40013	-1.25196	-1.9138
Solyc02g070210.2.1	0.245571	1.24	68.03	0.0201039	47.22	38.76	0.00191	75.03	61.59	0.000184	93.28	76.64	"Phosphatidylinositol transfer protein SFH5 (AHRD V1 *--- C6HEF9_AJECH); contains Interpro domain(s) IPR001251 Cellular retinaldehyde-binding/triple function, C-terminal "	2.57534	3.19362	4.7975	5.77015
Solyc02g070260.2.1	0.649685	18.47	24.5	0.320804	32.99	21.3	0.00125	69.5	66.91	0.000785	59.45	67.86	"Protein phosphatase 1 regulatory subunit 7 (AHRD V1 *--- C0S143_PARBP); contains Interpro domain(s) IPR001611 Leucine-rich repeat "	1.19076	1.45568	3.45263	3.13734
Solyc02g070430.2.1	4.37e-09	0.83	0.59	8.52e-08	1.41	0.51	1.27e-08	0.43	1.92	2.53e-10	0.8	0.39	"Gibberellin 2-oxidase 1 (AHRD V1 **** A7LCJ5_SOLTU); contains Interpro domain(s) IPR005123 Oxoglutarate and iron-dependent oxygenase "	-34.8981	-27.7694	-24.5142	-44.9957
Solyc02g070450.1.1	0.00702	0	0.38	0.0394579	0.81	0	0.671824	3.53	4.23	1	5.42	5.14	"Glucan endo-1 3-beta-glucosidase 7 (AHRD V1 ***- B6T478_MAIZE); contains Interpro domain(s) IPR013781 Glycoside hydrolase, subgroup, catalytic core "	-16.4792	-10.0065	-1.4289	-1.09322
Solyc02g070460.2.1	0.349646	10.54	13.63	1	10.95	5.37	0.03547	18.26	19.83	0.0707858	17.84	15.65	"Cullin 4 (AHRD V1 ***- A9LK40_SOLLC); contains Interpro domain(s) IPR001373 Cullin, N-terminal "	1.57101	1.03435	2.25947	1.93223
Solyc02g070540.2.1	0.71718	10.57	14.2	0.0644147	34.29	13.79	3.83e-07	126.51	79.19	3.25e-09	96.46	116.27	"Os01g0611000 protein (Fragment) (AHRD V1 ***- Q0JLB5_ORYSJ); contains Interpro domain(s) IPR006946 Protein of unknown function DUF642 "	1.22268	2.28275	9.27728	9.30699
Solyc02g070580.1.1	0.000591	14.51	19.81	0.00087	19.71	14.83	0.00125	17.66	20.03	0.000923	21.5	23.11	Cytochrome p450	-3.48647	-3.57033	-3.46718	-3.01142
Solyc02g070590.2.1	0.244045	3.98	1.29	0.00989	2.78	11.23	0.62531	1.02	1.86	1	1.17	1.23	Unknown Protein (AHRD V1)	5.01838	12.6446	2.63494	2.1784
Solyc02g070690.1.1	0.0095	6.16	5.27	1	1.38	0	0.62531	1.76	1.21	1	0	1.79	"C2 domain-containing protein (AHRD V1 ***- D7LFS6_ARALY); contains Interpro domain(s) IPR018029 C2 membrane targeting protein "	13.1192	1.78671	3.35917	2.09199
Solyc02g070770.2.1	0.249115	3.89	3.93	1	3.62	1.07	0.0166398	6.09	8.87	0.0355635	7.31	5.52	"NAD-dependent epimerase/dehydratase (AHRD V1 **-- B8HW76_CYAP4); contains Interpro domain(s) IPR016040 NAD(P)-binding domain "	2.43624	1.4472	4.20744	3.52295
Solyc02g070780.2.1	0.0518052	1.58	6.35	0.955073	17.51	15.54	0.0552016	48.72	48.07	0.0247539	56.78	54.59	"DNA replication licensing factor MCM3 (AHRD V1 **** Q16NY8_AEDAE); contains Interpro domain(s) IPR008046 MCM protein 3 "	-3.87237	1.02966	2.83067	3.1613
Solyc02g070790.2.1	0.356829	14.45	18.26	0.519305	19.31	11.1	0.217797	20.58	20.19	0.0441182	32.1	24.07	"3-oxoacyl-(Acyl-carrier-protein) synthase 2 (AHRD V1 **** D0ZZB8_CHLPP); contains Interpro domain(s) IPR017568 3-oxoacyl-[acyl-carrier-protein] synthase 2 "	1.57805	1.42391	1.7998	2.39841
Solyc02g070890.2.1	1.56e-09	7.91	9.68	0.000465	42.91	13.82	0.00235	31.28	51.29	0.000398	34.9	44.65	Receptor like kinase, RLK	-15.2196	-4.95988	-3.59565	-3.81307
Solyc02g070900.1.1	0.00674	4.83	2.66	0.027203	4.52	4.82	0.00149	3.9	2.87	0.00777	6.23	4.21	Unknown Protein (AHRD V1)	-3.62695	-3.02351	-4.36312	-2.9496
Solyc02g071070.2.1	3.48e-07	12.17	17.26	3.71e-08	13.36	8.41	1.34e-07	12.57	12.27	2.35e-05	28.03	25.54	"Cation/H(+) antiporter 18 (AHRD V1 **** CHX18_ARATH); contains Interpro domain(s) IPR006153 Cation/H+ exchanger "	-6.71049	-9.31953	-8.65165	-4.15067
Solyc02g071090.2.1	8.08e-08	29.36	30.84	0.0264971	5.86	14.38	0.77636	4.81	2.78	0.33357	5.29	6.26	"Purine permease family protein (AHRD V1 **-* D7MCV2_ARALY); contains Interpro domain(s) IPR004853 Protein of unknown function DUF250 "	10.8966	3.60362	1.29759	1.90009
Solyc02g071110.2.1	0.0948783	12.54	9.9	1	2.97	8.81	0.0396492	0.83	0.97	0.0929241	1.26	2.65	"Purine permease family protein (AHRD V1 **-* D7MCV2_ARALY); contains Interpro domain(s) IPR004853 Protein of unknown function DUF250 "	2.20604	1.1365	-5.44161	-2.76693
Solyc02g071130.2.1	7.06e-08	7.08	6.15	8.8e-07	10.63	5.36	0.000156	12.32	18.86	0.000419	22.03	22.09	"WRKY transcription factor 29 (AHRD V1 ***- C9DI18_9ROSI); contains Interpro domain(s) IPR003657 DNA-binding WRKY "	-10.1812	-8.76644	-4.79615	-3.48405
Solyc02g071160.2.1	0.7881	7.6	10.41	0.371555	18.33	14.15	0.0310979	24.17	29.59	0.00826	28.5	32.76	Os10g0578600 protein (Fragment) (AHRD V1 ***- Q0IVC7_ORYSJ)	-1.1756	1.4798	2.30314	2.55581
Solyc02g071210.2.1	0.000238	33.17	20.79	0.0365705	13.84	15.76	0.362035	12.95	5.16	0.00946	14.84	16.58	"Cold acclimation protein COR413-like (AHRD V1 *-*- A6YDU6_LOLTE); contains Interpro domain(s) IPR008892 Cold acclimation WCOR413 "	5.30384	2.81213	1.637	2.72403
Solyc02g071310.2.1	0.342201	6.89	8.95	0.920888	18.28	9.17	0.0283712	31.62	27.09	0.0167961	32.19	30.26	"Plasma membrane associated protein (AHRD V1 ***- B4FLA8_MAIZE); contains Interpro domain(s) IPR008390 AWPM-19-like "	-1.50004	1.10945	2.23797	2.31225
Solyc02g071340.1.1	0.00161	6.02	4.77	0.258801	1.7	1.56	1	0.03	0.1	1	0.23	0.2	"Lipid A export ATP-binding/permease protein msbA (AHRD V1 *--- MSBA_SYNAS); contains Interpro domain(s) IPR003439 ABC transporter-like "	39.9458	12.5188	1.37566	2.38684
Solyc02g071350.2.1	0.0109997	0.5	0.53	0.0958571	2.86	0.66	0.13047	2.39	1.66	0.0227171	1	1.45	"Lipid A export ATP-binding/permease protein msbA (AHRD V1 *--* MSBA_CHRVO); contains Interpro domain(s) IPR003439 ABC transporter-like "	-8.7281	-3.0707	-2.83377	-4.61647
Solyc02g071360.2.1	0.148414	20.96	21.5	0.0638773	16.67	19.33	0.032266	15.74	17.84	0.0153147	20.09	13.18	"1-aminocyclopropane-1-carboxylate oxidase 1 (AHRD V1 **-- ACCO1_MALDO); contains Interpro domain(s) IPR005123 Oxoglutarate and iron-dependent oxygenase "	-1.74249	-2.1163	-2.4105	-2.50422
Solyc02g071430.2.1	0.476724	8.49	7.35	4.09e-05	41.4	24.61	0.637181	3.97	3.38	1	8.37	3.23	"1-aminocyclopropane-1-carboxylate oxidase (AHRD V1 **-- ACCO_ACTDE); contains Interpro domain(s) IPR005123 Oxoglutarate and iron-dependent oxygenase "	1.55755	6.18359	-1.48258	1.021
Solyc02g071440.2.1	3.19e-08	29.86	35.8	0.00316	14.87	10.92	0.311439	5.07	5.11	0.58182	4.93	3.44	"1-aminocyclopropane-1-carboxylate oxidase 1 (AHRD V1 **-- ACCO1_MALDO); contains Interpro domain(s) IPR005123 Oxoglutarate and iron-dependent oxygenase "	12.0507	4.61954	1.7559	1.41394
Solyc02g071450.2.1	0.415516	23.25	22.59	0.103949	18.88	16.17	0.0797031	14.63	20.36	0.0362088	18.26	15.87	"1-aminocyclopropane-1-carboxylate oxidase 1 (AHRD V1 **-- ACCO1_MALDO); contains Interpro domain(s) IPR005123 Oxoglutarate and iron-dependent oxygenase "	-1.36085	-1.83651	-1.95257	-2.05627
Solyc02g071470.2.1	0.354924	192.57	200.87	0.370556	122.84	92.47	0.0123012	45.86	72.99	0.000109	50.61	32.98	"1-aminocyclopropane-1-carboxylate oxidase 1 (AHRD V1 **-* ACCO1_MALDO); contains Interpro domain(s) IPR005123 Oxoglutarate and iron-dependent oxygenase "	1.37112	-1.37892	-2.64894	-3.86948
Solyc02g071490.2.1	0.0134285	6.31	18.19	0.0783721	21.29	11.91	0.498406	17.4	35.46	0.193684	21.64	23.83	"1-aminocyclopropane-1-carboxylate oxidase 1 (AHRD V1 **-- ACCO1_MALDO); contains Interpro domain(s) IPR005123 Oxoglutarate and iron-dependent oxygenase "	-2.60585	-1.97643	-1.32086	-1.56887
Solyc02g071560.2.1	0.712407	97.54	59.3	0.21285	48.63	68.21	0.000117	20.19	20.97	0.00476	41.74	34.38	"Subtilisin-like protease (AHRD V1 ***- Q9FK77_ARATH); contains Interpro domain(s) IPR015500 Peptidase S8, subtilisin-related "	-1.15602	-1.61114	-4.85191	-2.70831
Solyc02g071620.2.1	0.0159251	0.68	0.9	1	6.26	3.45	0.830024	5.59	4.46	0.825855	3.29	6.92	"GDSL esterase/lipase At1g29670 (AHRD V1 ***- GDL15_ARATH); contains Interpro domain(s) IPR001087 Lipase, GDSL "	-5.88892	-1.12334	-1.14725	-1.16073
Solyc02g071640.1.1	0.401703	3.42	1.57	0.418905	1.76	3.42	0.0243911	0.83	0.38	0.0585433	1.96	0.5	"GDSL esterase/lipase At1g29670 (AHRD V1 ***- GDL15_ARATH); contains Interpro domain(s) IPR001087 Lipase, GDSL "	-1.95931	-1.9563	-7.60747	-4.23546
Solyc02g071740.2.1	0.00399	48.41	43.12	0.0792702	89.41	42.8	0.249456	84.4	93.72	0.0650307	83.08	72.38	"Protein-tyrosine kinase 6 (AHRD V1 **** PTK6_MOUSE); contains Interpro domain(s) IPR016253 Integrin-linked protein kinase "	-2.68336	-1.93867	-1.51697	-1.78777
Solyc02g071750.2.1	0.0027	17.87	15	0.395799	5.35	9.68	0.835213	5.63	5.79	1	4.79	3.96	"Cyclic phosphodiesterase (AHRD V1 ***- D7M9D2_ARALY); contains Interpro domain(s) IPR012386 2 , 3 cyclic phosphodiesterase, plant "	3.85998	1.72555	1.24559	-1.06582
Solyc02g071770.2.1	0.161921	9.76	7.47	0.138157	10.54	8.6	0.0398659	0.69	0.47	0.0393201	0.77	0.63	"DUF1264 domain protein (AHRD V1 **-- A1CBM4_ASPCL); contains Interpro domain(s) IPR010686 Protein of unknown function DUF1264 "	2.03747	2.1841	-6.5539	-5.78547
Solyc02g071780.2.1	0.00199	41.81	32.85	0.18078	91.52	54.24	0.0128871	60.77	29.02	0.000771	40.44	43.25	"Necrotic spotted lesions 1 (Fragment) (AHRD V1 *-*- B6ZA38_HELPE); contains Interpro domain(s) IPR001862 Membrane attack complex component/perforin/complement C9 "	-3.05717	-1.63567	-2.78314	-3.08309
Solyc02g071800.2.1	0.0528771	7.78	12.36	0.0251788	9.22	7.66	0.599881	23.98	32.05	1	21.04	24.82	Receptor like kinase, RLK	-2.02008	-2.47377	1.25003	-1.00037
Solyc02g071810.2.1	0.00549	0.03	0.19	0.0038	0.32	0	0.01213	0.17	0.98	0.0118502	0.38	0.6	Receptor like kinase, RLK	-21.2933	-17.5822	-7.62836	-8.95813
Solyc02g071820.2.1	0.0154158	18.82	15.52	0.41499	47.22	16.6	0.00345	131.44	168.5	0.370199	76.21	58.32	Receptor like kinase, RLK	-2.53	-1.42892	3.11514	1.36058
Solyc02g071920.2.1	0.697763	62.32	55.24	0.168015	24.48	36.84	0.000818	15.81	13.19	0.011961	28.31	20	"Transmembrane water channel Aquaporin Z (AHRD V1 **** B7VL99_VIBSL); contains Interpro domain(s) IPR012269 Aquaporin "	1.15619	-1.70604	-3.81944	-2.374
Solyc02g071930.1.1	1	0.28	1.71	0.48874	3.76	1.49	0.000737	10.62	8.17	4.1e-05	12.93	10.52	"CTD small phosphatase-like protein (AHRD V1 *-** C3KI43_ANOFI); contains Interpro domain(s) IPR011948 Dullard-like phosphatase domain "	1.22174	2.90997	9.51293	11.5261
Solyc02g071950.1.1	0.145228	34.99	55.71	1	11.66	36.84	0.000899	6.41	3.83	0.00244	4.74	8.83	Unknown Protein (AHRD V1)	1.87973	-1.00687	-4.99166	-3.88632
Solyc02g071970.1.1	0.00766	1.38	2.78	0.00454	2.01	1.1	0.787187	12.19	6.07	0.324291	6.88	7.16	Unknown Protein (AHRD V1)	-4.50005	-6.06748	-1.16764	-1.55358
Solyc02g071980.2.1	0.540406	24.46	26.87	0.177698	20.58	19.07	0.0598043	16.43	18.69	0.0205007	16.84	16.03	"Actin-binding protein involved in bundling of actin filaments and endocytosis of actin cortical patches activity stimulated by Las17p contains SH3 domain similar to Rvs167p (AHRD V1 *--* D3DKW1_YEAST); contains Interpro domain(s) IPR007461 Ysc84 actin-binding domain "	-1.26464	-1.68623	-2.01829	-2.21426
Solyc02g072000.2.1	0.524035	17.57	15.05	0.239305	10.75	16.88	0.00147	8.68	4.11	9.32e-05	6.24	5.69	"Heat stress transcription factor A3 (AHRD V1 *-*- D1M7W9_SOLLC); contains Interpro domain(s) IPR000232 Heat shock factor (HSF)-type, DNA-binding "	-1.30528	-1.58633	-3.59948	-3.96446
Solyc02g072080.1.1	0.319397	157.36	114.33	0.721801	98.67	123.18	0.0327292	56.18	20.87	0.00149	33.51	31.02	"U-box domain-containing protein 17 (AHRD V1 **-- PUB17_ARATH); contains Interpro domain(s) IPR011989 Armadillo-like helical "	1.46186	1.1515	-2.63619	-3.25684
Solyc02g072100.2.1	1	2.86	3.37	0.2413	6.36	7.35	0.0936082	10.95	7.48	0.0244973	9.02	12.01	Ubiquitin domain containing 1 (AHRD V1 ***- B6T693_MAIZE)	-1.03598	2.01879	2.54439	2.81304
Solyc02g072130.2.1	0.0613043	277.82	276.18	0.26647	387.27	338.36	0.0828808	320.58	273.98	0.0436557	299.19	312.49	"Protein transport protein SEC61 alpha subunit (AHRD V1 ***- D3B1K5_POLPA); contains Interpro domain(s) IPR002208 SecY protein "	-1.85208	-1.46302	-1.8889	-1.88931
Solyc02g072150.2.1	0.00244	95.32	67.49	0.0115653	120.76	79.61	0.00179	95.08	59.7	0.000147	78.56	78.04	"Alpha alpha-trehalose-phosphate synthase (UDP-forming) (AHRD V1 **** A3CXN9_METMJ); contains Interpro domain(s) IPR001830 Glycosyl transferase, family 20 "	-2.91505	-2.47474	-3.36957	-3.43704
Solyc02g072190.2.1	0.000444	43.8	44.29	0.0143094	69.57	59.75	8.33e-08	16.92	19.61	1.38e-06	38.52	23.82	"WRKY transcription factor 5 (AHRD V1 ***- A7UGD2_SOLTU); contains Interpro domain(s) IPR003657 DNA-binding WRKY "	-3.34126	-2.35556	-8.79392	-5.3317
Solyc02g072210.1.1	0.82819	51.27	32.9	0.621657	52.98	44.55	0.000682	10.84	3.96	9.86e-06	7.37	3	Unknown Protein (AHRD V1)	1.11362	1.23682	-5.53446	-8.12038
Solyc02g072300.2.1	0.0146456	67.92	72.2	0.0533006	90.71	77.54	0.392783	121.63	132.87	0.251191	125.57	123.54	"Glycogen synthase kinase (AHRD V1 **** C7AE95_SOYBN); contains Interpro domain(s) IPR002290 Serine/threonine protein kinase "	-2.25618	-1.94197	-1.36162	-1.42927
Solyc02g072310.2.1	0.369236	6.21	4.92	0.671689	7.9	1.99	0.0217524	9.96	10.39	0.0237788	9.48	10.07	Receptor like kinase, RLK	1.86734	1.60685	3.09076	2.88907
Solyc02g072320.1.1	0.198528	11.13	7.85	1	4.7	6.84	0.033455	11.52	15.1	0.125611	10.22	12.69	Somatic embryogenesis receptor-like kinase 2 (AHRD V1 ***- Q659J1_POAPR)	1.87577	1.11439	2.39061	2.00606
Solyc02g072370.1.1	1.55e-19	110.82	126.18	2.98e-10	27.04	25.5	1	0.00927	0	0.250229	1.51	1.96	"Subtilisin-like protease (AHRD V1 ***- Q9LWA3_SOLLC); contains Interpro domain(s) IPR015500 Peptidase S8, subtilisin-related "	920.938	202.101	1.0345	13.7742
Solyc02g072400.1.1	0.00472	0.68	1.21	0.00469	2.07	0.38	0.496564	3.1	8.58	0.0542791	3.34	3.22	Receptor like kinase, RLK	-7.49256	-6.1515	-1.47831	-2.6497
Solyc02g072480.2.1	0.352365	7.73	6.49	0.0335804	11.24	13.29	0.0455155	1.41	0.24	0.109911	1.16	1.02	Receptor like kinase, RLK	1.79664	2.98098	-4.56815	-3.67919
Solyc02g072490.2.1	0.374038	4.29	3.07	0.128152	5.05	5.52	0.0159722	7.86	9.11	0.180496	6.21	4.93	"Os01g0841200 protein (Fragment) (AHRD V1 *--- Q0JHU9_ORYSJ); contains Interpro domain(s) IPR004348 Protein of unknown function DUF246, plant "	2.09251	2.88452	4.34491	2.80324
Solyc02g072500.2.1	1	3.3	4.69	0.120273	10.19	7.28	0.0285242	14.27	8.19	0.00956	12.93	13.28	"Nucleobase ascorbate transporter (AHRD V1 **-* B9I1J7_POPTR); contains Interpro domain(s) IPR006043 Xanthine/uracil/vitamin C permease "	1.12843	2.3549	2.85511	3.22583
Solyc02g076660.2.1	0.179336	36.55	37.81	1	17.66	27.71	5.52e-05	4.19	3.87	5.47e-05	5.8	3.84	Receptor like kinase, RLK	1.6691	-1.00747	-5.86649	-5.06984
Solyc02g076670.2.1	0.00328	20.98	19.77	0.00231	20.72	18.57	1.81e-06	7.63	7.52	3.51e-06	13.33	8.05	"Myb-like DNA-binding domain SHAQKYF class family protein expressed (AHRD V1 *--- Q2QYV2_ORYSJ); contains Interpro domain(s) IPR006447 Myb-like DNA-binding region, SHAQKYF class "	-3.3672	-3.61184	-9.82477	-7.20974
Solyc02g076680.2.1	1	0.41	1.34	0.393803	2.74	1.78	0.000389	8.93	8.29	1.25e-05	12.89	9.95	"Unknown Protein (AHRD V1); contains Interpro domain(s) IPR007789 Protein of unknown function DUF688 "	1.51359	3.49388	12.1177	15.6109
Solyc02g076750.1.1	0.257967	29.66	39.64	0.637399	53.16	40.53	0.0462403	27.64	22.31	0.217663	33.99	40.89	"Cathepsin B-like cysteine proteinase (AHRD V1 **-* CYSP_SCHMA); contains Interpro domain(s) IPR013128 Peptidase C1A, papain "	-1.62343	-1.23775	-2.4462	-1.6809
Solyc02g076760.2.1	0.00622	12.95	8.97	0.412106	17.57	27.42	0.0697283	18.58	15.21	0.0501532	17.15	18.08	"N-(5&apos-phosphoribosyl)anthranilate isomerase (AHRD V1 **** B9SQM9_RICCO); contains Interpro domain(s) IPR011060 Ribulose-phosphate binding barrel "	-2.75416	-1.39276	-1.96844	-1.94257
Solyc02g076820.2.1	1	6.92	2.12	0.86062	5.88	0	4.31e-06	31.33	39.41	0.000115	19.98	28.88	"Light-dependent short hypocotyls 1 (AHRD V1 ***- D7M6V0_ARALY); contains Interpro domain(s) IPR006936 Protein of unknown function DUF640 "	1.16119	-1.38455	8.06008	5.46326
Solyc02g076830.1.1	1.41e-05	5.83	4.25	8.82e-05	2.29	8.52	0.0014	8.33	11.06	0.000755	10.39	10.61	"S-locus-specific glycoprotein (Fragment) (AHRD V1 **-- Q84V84_CICIN); contains Interpro domain(s) IPR001480 Curculin-like (mannose-binding) lectin "	-5.92079	-5.68943	-3.41842	-3.24376
Solyc02g076850.1.1	0.00608	12.69	13.78	0.114402	22.45	22.69	0.015753	12.34	20.48	0.030298	25.46	15.69	"Dof zinc finger protein (AHRD V1 *-*- C4B6D7_IPOBA); contains Interpro domain(s) IPR003851 Zinc finger, Dof-type "	-3.18109	-1.93062	-2.81892	-2.31878
Solyc02g076880.2.1	1	0.22	1.82	1	2.32	1.77	0.236697	5.88	2.53	0.0077	9.29	6.42	"Copper ion binding protein (AHRD V1 **-* B6T4F6_MAIZE); contains Interpro domain(s) IPR006121 Heavy metal transport/detoxification protein "	-1.39481	1.31642	2.48572	4.45528
Solyc02g076890.1.1	0.366924	4.4	105.6	0.835461	33.64	25.56	0.00351	2.75	1.41	0.612885	73.27	8.66	"Unknown Protein (AHRD V1); contains Interpro domain(s) IPR007493 Protein of unknown function DUF538 "	2.1796	1.17841	-12.0108	1.47401
Solyc02g076910.2.1	1.48e-08	63.46	55.47	0.000963	15.13	40.13	0.011897	1.13	0.05	0.00198	0.57	0.08	"Cathepsin B-like cysteine proteinase (AHRD V1 **-* CYSP_SCHMA); contains Interpro domain(s) IPR013128 Peptidase C1A, papain "	11.7677	5.34408	-7.69161	-12.3449
Solyc02g076920.2.1	0.0228309	23	31.43	0.580391	7.77	23.41	0.000138	0.55	0.71	8.08e-05	0.73	0.79	"Transcription factor MYC2 (AHRD V1 *--* RAP1_ARATH); contains Interpro domain(s) IPR001092 Basic helix-loop-helix dimerisation region bHLH "	2.46775	1.38836	-15.7479	-13.8348
Solyc02g076930.1.1	1.91e-06	8.06	8.45	1.53e-06	6.2	8.69	1.63e-08	4.15	4.97	2.03e-10	4.64	3.37	"Armadillo/beta-catenin repeat family protein (AHRD V1 **-- D7MAU3_ARALY); contains Interpro domain(s) IPR011989 Armadillo-like helical "	-6.98825	-7.96262	-13.6669	-15.9472
Solyc02g076970.1.1	2.44e-28	563.58	492.02	1.01e-11	50.18	93.14	1	0.58	0.17	0.0166085	12.86	3.84	"Cathepsin B-like cysteine proteinase (AHRD V1 **-* CYSP_SCHMA); contains Interpro domain(s) IPR013128 Peptidase C1A, papain "	407.518	53.9607	-2.78704	5.80244
Solyc02g076980.2.1	0.00561	11.46	6.47	0.547974	4.72	1.51	0.346077	4.85	2.83	0.0129483	8.13	7.05	"Cathepsin B-like cysteine proteinase (AHRD V1 **-* CYSP_SCHMA); contains Interpro domain(s) IPR013128 Peptidase C1A, papain IPR000169 Peptidase, cysteine peptidase active site "	5.67639	1.95158	2.26712	4.28603
Solyc02g077000.2.1	0.368877	17.07	48.92	0.703306	16.85	20.77	0.00862	67.18	70	0.00766	61.05	68.87	"Lipase-like (AHRD V1 ***- Q8RZ40_ORYSJ); contains Interpro domain(s) IPR002921 Lipase, class 3 "	1.49299	-1.18513	2.8787	2.65879
Solyc02g077030.2.1	1	2.77	0.95	1	2.16	1.38	0.00261	8.27	10.84	0.0016	10.09	9.49	"Lipase-like (AHRD V1 ***- Q8RZ40_ORYSJ); contains Interpro domain(s) IPR002921 Lipase, class 3 "	1.20416	1.11403	5.37539	5.36897
Solyc02g077060.1.1	5.95e-07	36.12	39.25	6.71e-05	24.89	30.1	0.114616	18.89	4.53	0.53232	9.41	5.08	"RPW8.2 (AHRD V1 **-- C4P0N9_ARALP); contains Interpro domain(s) IPR008808 Mildew-resistance, broad-spectrum "	8.16918	5.79872	2.35444	1.42145
Solyc02g077070.2.1	0.46601	2.02	2.64	0.0260794	2.9	11.52	0.500207	0	0	0.500152	0	0.17	Unknown Protein (AHRD V1)	1.8642	5.43702	-10.6913	-6.70655
Solyc02g077080.2.1	0.875036	105.44	98.13	0.628963	81.39	104.4	0.0996557	62.86	64.11	0.010689	55.37	47.93	"Os06g0207500 protein (Fragment) (AHRD V1 **-- Q0DDQ9_ORYSJ); contains Interpro domain(s) IPR004253 Protein of unknown function DUF231, plant "	-1.05825	-1.19571	-1.8607	-2.35263
Solyc02g077090.2.1	1	5.84	8.08	0.0772078	13.12	16.72	0.0174771	23.41	15.64	0.00502	21.06	21.44	Chloroplast unusual positioning 1A (AHRD V1 *--- B3IYT7_ADICA)	1.09683	2.27087	2.79241	2.94026
Solyc02g077190.1.1	0.00283	8.07	8.64	1	1.32	1.54	1	1.37	1.61	1	1.76	1.31	Unknown Protein (AHRD V1)	7.01802	1.25301	1.23157	1.23631
Solyc02g077210.1.1	0.00233	8.61	5.92	0.0608774	0.89	9.38	0.62531	1.48	2.24	0.625229	1.39	1.62	Unknown Protein (AHRD V1)	16.9075	11.8116	4.22256	3.38519
Solyc02g077240.2.1	3.84e-08	8.13	7.7	0.00056	38.24	11.08	0.131775	42.19	957.05	0.514061	125.37	129.25	"Pyruvate decarboxylase (AHRD V1 **** Q1I1D9_CITSI); contains Interpro domain(s) IPR012110 Pyruvate decarboxylase/indolepyruvate decarboxylase "	-18.6084	-6.30665	2.99988	-1.32274
Solyc02g077260.2.1	0.0108905	15.48	29.83	0.0125541	22.83	22.11	0.00737	22.35	23.57	0.021493	21.87	18.34	"Calmodulin binding protein (AHRD V1 **-* B6TIB2_MAIZE); contains Interpro domain(s) IPR000048 IQ calmodulin-binding region "	2.99103	2.90054	2.79783	2.38832
Solyc02g077270.2.1	0.190761	11.68	9.79	0.0996362	7.96	10.96	0.00232	7.11	4.19	0.00581	6.88	7.18	"Calcium ion binding protein (AHRD V1 *-*- B6U1M5_MAIZE); contains Interpro domain(s) IPR011992 EF-Hand type "	-1.73003	-2.02267	-3.5579	-2.94993
Solyc02g077280.2.1	0.0102586	10.49	8.13	0.0621773	5.31	9.05	0.123373	5.43	5.95	0.388578	4.18	4.71	"GTP-binding protein era homolog (AHRD V1 ***- D0MDG4_RHOM4); contains Interpro domain(s) IPR005662 GTP-binding protein Era "	4.39807	3.30749	2.48397	1.90152
Solyc02g077290.1.1	0.166272	1.54	1.52	0.30833	2.81	1.42	0.0668086	1.07	1.28	0.0118502	0.89	0.74	"Glutamate-gated kainate-type ion channel receptor subunit GluR5 (AHRD V1 **** B9H2M2_POPTR); contains Interpro domain(s) IPR015683 Glutamate receptor-related "	-2.92728	-2.22937	-4.0465	-5.73876
Solyc02g077370.1.1	0.0312406	69.5	23.88	0.0966778	20.41	58.1	0.620089	33.63	15.36	0.730403	22.25	13.67	"Ethylene-responsive transcription factor 2 (AHRD V1 ***- B6SSU7_MAIZE); contains Interpro domain(s) IPR001471 Pathogenesis-related transcriptional factor and ERF, DNA-binding "	2.58559	2.0892	1.22478	-1.15163
Solyc02g077400.2.1	1	8.02	7.35	0.481599	12.4	10.36	0.00689	26.02	26.42	0.172223	16.3	14.36	"Rac-like GTP binding protein (AHRD V1 **-- Q9S821_PHYPA); contains Interpro domain(s) IPR003578 Ras small GTPase, Rho type "	1.00298	1.42766	3.09063	1.77001
Solyc02g077420.2.1	3.19e-05	31.52	44.62	0.046048	142.29	76.21	0.0176841	72.25	117.84	0.082859	63.36	190.59	"Lipase-like (AHRD V1 ***- Q8RZ40_ORYSJ); contains Interpro domain(s) IPR002921 Lipase, class 3 "	-6.97664	-2.51741	-3.06033	-2.32068
Solyc02g077430.2.1	4.37e-07	6.8	22.54	7.83e-06	32.75	13.59	0.0049	54.1	81.4	0.0360764	92.02	124.37	"Lipase-like (AHRD V1 ***- Q8RZ40_ORYSJ); contains Interpro domain(s) IPR002921 Lipase, class 3 "	-16.7751	-10.8955	-3.94775	-2.5264
Solyc02g077440.2.1	0.0321444	46.63	54.12	0.385305	40.25	28.66	0.0669041	45.03	60.41	0.209718	50.38	33.33	"Transcription elongation factor 1 homolog (AHRD V1 **** C1C367_9MAXI); contains Interpro domain(s) IPR007808 Protein of unknown function DUF701, zinc-binding putative "	2.10801	1.39747	2.01509	1.55474
Solyc02g077470.2.1	0.00701	29.71	20.11	0.877149	89.66	64.75	0.194199	63.42	21.81	0.0259425	38.45	34.86	"Optic atrophy 3 protein homolog (AHRD V1 **-- OPA3_DANRE); contains Interpro domain(s) IPR010754 Optic atrophy 3-like "	-2.78082	1.06533	-1.78244	-2.146
Solyc02g077480.1.1	0.0395892	18.19	57.94	0.682429	116.46	126.22	0.302055	354.96	291.4	0.227789	401.84	321.23	"Histone H3 (AHRD V1 ***- D8L9K7_WHEAT); contains Interpro domain(s) IPR000164 Histone H3 "	-4.08683	-1.29748	1.93483	2.09592
Solyc02g077520.2.1	0.170395	40.37	51.38	0.929028	21.17	38.89	0.038376	15.01	12.22	0.0165627	16.11	10.36	"O-methyltransferase (AHRD V1 ***- A5HK00_VITVI); contains Interpro domain(s) IPR016461 O-methyltransferase, COMT, eukaryota "	1.63958	1.05093	-2.2228	-2.35687
Solyc02g077560.2.1	0.2409	15.52	7.57	0.243453	15	8.71	0.0283646	16.28	19.16	0.0402491	15.17	17.3	"Auxin response factor 3 (AHRD V1 **** Q2LAJ4_SOLLC); contains Interpro domain(s) IPR010525 Auxin response factor "	1.72254	1.69729	2.39174	2.13653
Solyc02g077590.1.1	0.500768	0	0	0.506469	0.42	0	0.00264	5.03	20	0.0578953	6.72	5.09	"Homeobox-leucine zipper-like protein (AHRD V1 *-*- Q3HRT1_PICGL); contains Interpro domain(s) IPR001356 Homeobox "	-10.8944	-4.25321	8.24406	3.84849
Solyc02g077610.2.1	0.734655	1.83	1.12	1	1.75	2.09	0.000413	22.43	12.47	0.000824	14.9	12.76	"NAC domain protein IPR003441 (AHRD V1 ***- B9H2Q1_POPTR); contains Interpro domain(s) IPR003441 No apical meristem (NAM) protein "	-1.78795	-1.44018	5.62593	4.33345
Solyc02g077630.2.1	0.0823	3.66	7.74	0.126583	6.58	3.93	7.38e-06	14.62	19.79	3.03e-05	13.96	17.3	Receptor like kinase, RLK	3.46912	3.12045	9.48974	8.40926
Solyc02g077670.2.1	0.0373045	10.17	10.54	0.0879777	10.46	7.85	0.280341	6.87	6.63	0.386818	7.73	5.88	"Chaperone protein dnaJ 2 (AHRD V1 ***- DNAJ2_ARATH); contains Interpro domain(s) IPR003095 Heat shock protein DnaJ "	2.81422	2.41397	1.6931	1.66153
Solyc02g077700.1.1	0.385693	2.51	1.31	0.106516	5.57	1.43	0.0220716	5.17	4.26	0.0216724	5.22	4.58	Unknown Protein (AHRD V1)	3.26672	5.62582	7.17049	7.25518
Solyc02g077710.1.1	0.0775163	41.05	31.64	0.013972	109.17	24.89	3.32e-07	236.49	150.14	3.67e-09	177.26	227.96	E6-2 protein kinase (AHRD V1 *-*- B6E139_GOSHI)	2.03496	3.55226	9.83676	10.031
Solyc02g077770.2.1	0.280976	15.63	6.91	0.139405	10.33	8.92	0.0294282	8.13	4.43	0.392441	20.1	10.95	Unknown Protein (AHRD V1)	-1.85203	-2.26311	-3.63754	-1.54484
Solyc02g077780.2.1	2.66e-06	19	19.34	0.00325	47.69	26.27	0.00099	36.48	31.29	7.91e-05	31.02	33.88	"Necrotic spotted lesions 1 (Fragment) (AHRD V1 *-*- B6ZA38_HELPE); contains Interpro domain(s) IPR001862 Membrane attack complex component/perforin/complement C9 "	-5.6259	-3.03732	-3.49094	-3.74848
Solyc02g077870.1.1	1.06e-16	130.02	102.59	1.38e-07	18.52	52.41	0.500207	0.13	0	1	2.57	0.39	Unknown Protein (AHRD V1)	125.36	37.3975	-5.07019	1.54893
Solyc02g077880.2.1	5.78e-10	967.29	454.67	2.14e-05	190	477.11	0.000519	165.12	277.44	0.00026	217.19	168.36	"Auxin-repressed protein (AHRD V1 ***- Q6PXE1_9SOLN); contains Interpro domain(s) IPR008406 Dormancyauxin associated "	13.8512	6.26189	3.85813	3.27409
Solyc02g077920.2.1	0.0444115	8.94	7.62	1	3.23	1.88	0.383818	2.7	8.85	1	3.46	3.69	"Squamosa promoter binding-like protein (AHRD V1 ***- Q0PY35_SOLLC); contains Interpro domain(s) IPR004333 Transcription factor, SBP-box "	2.97337	-1.08941	1.90644	1.17024
Solyc02g077950.1.1	0.246237	6.56	6.87	0.615114	9.69	8.06	0.212507	17.48	22.13	0.0117402	31.82	29.72	"Dof zinc finger protein (AHRD V1 ***- Q0PY33_SOLLC); contains Interpro domain(s) IPR003851 Zinc finger, Dof-type "	-1.67815	-1.31572	1.58576	2.39221
Solyc02g078010.2.1	1	13.62	13.1	0.849753	8.98	16.06	0.0493563	8.04	5.52	0.201036	10.6	7.92	Unknown Protein (AHRD V1)	-1.03251	-1.13064	-2.20583	-1.67347
Solyc02g078030.1.1	0.0619446	171.2	135.1	0.112336	179.12	169.97	0.000568	97.66	63.89	1.59e-05	70.69	77.32	"DNA-binding WRKY VQ (AHRD V1 ***- Q2HTS9_MEDTR); contains Interpro domain(s) IPR008889 VQ "	-1.95459	-1.78107	-4.06394	-4.57092
Solyc02g078040.2.1	0.00611	22.07	10.75	0.00122	29.56	13.67	2.78e-10	116.49	86.15	1.5e-12	96.66	104.47	"Pistil extensin like protein (Fragment) (AHRD V1 *-*- Q40552_TOBAC); contains Interpro domain(s) IPR006041 Pollen Ole e 1 allergen and extensin "	3.9038	4.90145	21.7771	20.9659
Solyc02g078100.2.1	0.0102863	0.4	12.46	0.374148	41.22	65.79	0.0198451	19.09	3.39	0.659742	93.35	79.62	"pistil extensin-like protein (Fragment) (AHRD V1 *-*- Q49I33_NICPL); contains Interpro domain(s) IPR006041 Pollen Ole e 1 allergen and extensin "	-17.507	-2.12407	-10.5726	-1.44552
Solyc02g078110.1.1	0.00698	0	0	0.0307629	0.68	0	0.841541	0.76	20.57	0.828047	4.93	9.04	Unknown Protein (AHRD V1)	-63.5899	-18.0391	1.19204	-1.29374
Solyc02g078130.2.1	4.07e-05	1.74	1.59	0.00598	3.58	6.08	0.0119148	9.6	1.15	0.203464	15.3	11.03	"Basic helix-loop-helix family protein (AHRD V1 ***- D7MFG5_ARALY); contains Interpro domain(s) IPR011598 Helix-loop-helix DNA-binding "	-11.1655	-4.16267	-3.96268	-1.69649
Solyc02g078140.2.1	0.0432342	76.5	75.07	0.910777	29.35	44.15	0.490166	28.06	36.18	0.413233	31.66	32.59	"Protein kinase (AHRD V1 ***- Q39886_SOYBN); contains Interpro domain(s) IPR002290 Serine/threonine protein kinase "	1.98756	-1.06552	-1.29996	-1.33363
Solyc02g078150.2.1	0.00692	0	1.72	0.0593543	3.93	3.22	0.0554029	6.42	1.66	0.773468	26.17	6.66	"Plant-specific domain TIGR01615 family protein (AHRD V1 *-*- B6UDN7_MAIZE); contains Interpro domain(s) IPR006502 Protein of unknown function DUF506, plant "	-18.9654	-5.17457	-4.83099	-1.27706
Solyc02g078170.1.1	0.0603511	6.71	3.88	0.0822487	6.17	5.74	0.0840879	6.31	6.62	0.0175553	5.52	5.44	"Receptor protein kinase like protein (AHRD V1 **** O49445_ARATH); contains Interpro domain(s) IPR001220 Legume lectin, beta chain "	-2.34283	-2.16001	-2.10978	-2.54561
Solyc02g078300.2.1	0.156315	10.12	14.53	0.0452552	11.67	7.03	0.21359	13.63	15.14	0.365257	21.26	13.15	"Transcription initiation factor TFIID subunit (AHRD V1 ***- D3BV86_POLPA); contains Interpro domain(s) IPR003195 Transcription initiation factor IID, 18 kDa subunit "	-1.70726	-2.31136	-1.59816	-1.37924
Solyc02g078320.1.1	0.618165	31.64	31.61	0.127564	22.78	20.76	0.0499759	20.42	17.08	0.0345558	22.72	16.68	"RING finger protein 5 (AHRD V1 *--- B6UBI0_MAIZE); contains Interpro domain(s) IPR018957 Zinc finger, C3HC4 RING-type "	-1.20346	-1.80374	-2.2148	-2.1742
Solyc02g078380.2.1	0.6038	3.26	2.54	0.610074	8.94	6.51	0.00252	12.35	93.91	0.0931191	17.03	10.89	Aluminum-induced protein-like protein (AHRD V1 **-- Q8S2R9_THEHA)	-1.80076	1.38779	8.82899	2.26353
Solyc02g078400.2.1	8.51e-07	2.08	6.39	0.0029	12.2	9.93	0.736462	29.83	35.98	0.035051	18.25	18.86	"Allantoinase (AHRD V1 **** Q6S4R9_ROBPS); contains Interpro domain(s) IPR017593 Allantoinase "	-7.97501	-3.19673	-1.14862	-2.08504
Solyc02g078450.2.1	1	1.34	0.87	0.0207304	3.89	6.3	0.0707649	4.2	2.92	0.219179	2.23	2.98	"Tetraspanin family protein (AHRD V1 ***- B6TTZ1_MAIZE); contains Interpro domain(s) IPR000301 Tetraspanin, subgroup "	2.16268	8.94315	5.98263	4.33408
Solyc02g078480.2.1	9.79e-06	8.94	16.94	0.0212305	43.55	15.96	0.142094	53.21	39.2	0.105015	47.78	50.18	"CBS domain containing protein (AHRD V1 ***- B6SWR6_MAIZE); contains Interpro domain(s) IPR000644 Cystathionine beta-synthase, core "	-5.718	-2.58482	-1.7482	-1.69842
Solyc02g078500.2.1	2.76e-05	0.77	1.64	0.00157	10.73	2.55	0.016726	23.65	13.95	0.183317	82.14	22.28	Aluminum-induced protein-like (AHRD V1 ***- Q9FG81_ARATH)	-113.142	-23.0674	-8.60559	-3.25514
Solyc02g078530.2.1	0.000263	40.11	28.18	0.00644	57.2	47.28	1.1e-05	27.34	22.91	3.61e-07	23.02	24.58	"Receptor-like protein kinase At3g21340 (AHRD V1 **** RLK6_ARATH); contains Interpro domain(s) IPR002290 Serine/threonine protein kinase "	-4.11144	-2.80143	-6.14241	-6.66876
Solyc02g078570.2.1	3.1e-07	108.33	115.68	0.00093	49.3	85.63	0.524442	26.05	22.14	0.209832	29.51	28.9	"Epoxide hydrolase 3 (AHRD V1 **** D8L7V9_PRUPE); contains Interpro domain(s) IPR000639 Epoxide hydrolase-like "	6.53062	3.83924	1.29134	1.51959
Solyc02g078630.2.1	0.0856838	6.72	7.25	0.139749	7.08	7.58	0.0374172	7.16	6.27	0.065873	6.12	8.96	"Os10g0495900 protein (Fragment) (AHRD V1 *-*- Q0IWP8_ORYSJ); contains Interpro domain(s) IPR009606 Protein of unknown function DUF1218 "	-1.9483	-1.91472	-2.21035	-2.02724
Solyc02g078650.2.1	0.000407	3.16	13.61	0.0640512	39.24	16.56	0.776474	73.25	69.17	0.386141	54.39	56.33	"Polyphenol oxidase (AHRD V1 ***- B3WFP2_TAROF); contains Interpro domain(s) IPR016213 Polyphenol oxidase, plant "	-9.10788	-2.82848	-1.16825	-1.54487
Solyc02g078660.2.1	5.18e-06	1.44	2.8	0.000446	6.12	1.11	0.0278391	12.2	6.81	0.06025	10.24	14.43	Phosphoinositide-binding clathrin adaptor N-terminal Wiscott-Aldrich syndrome C-terminal (AHRD V1 *--- A2Q4Q2_MEDTR)	-9.66719	-6.01876	-2.46066	-1.95434
Solyc02g078670.2.1	0.0300576	34.94	69.56	0.0590255	77.07	38.89	0.0436532	45.91	71.44	0.141215	63.05	93.6	COP1-Interacting ProteinI 7 (CIP7) (Fragment) (AHRD V1 *-*- Q7GDB1_ARATH)	-2.25808	-2.0907	-2.18369	-1.66993
Solyc02g078710.1.1	7.38e-09	17.27	18.43	0.0378318	3.13	3.57	1	0	0	1	0.31	0.48	"Kelch-like 8 (AHRD V1 *-*- Q28D69_XENTR); contains Interpro domain(s) IPR015915 Kelch-type beta propeller "	139.711	26.6514	1	3.88895
Solyc02g078780.2.1	0.0382961	14.11	14.1	0.0252505	17.3	14.38	0.000423	28.96	23.01	0.000121	25.38	27.36	Receptor like kinase, RLK	2.47032	2.68377	4.14956	4.09402
Solyc02g078800.2.1	0.56765	9.77	11.34	0.780392	10.36	8.9	0.0363232	19.9	18.71	0.134802	15.25	14.88	"WD-repeat protein (AHRD V1 *--- B0C2Q9_ACAM1); contains Interpro domain(s) IPR020472 G-protein beta WD-40 repeat, region "	1.35174	1.19801	2.25079	1.70947
Solyc02g078820.2.1	0.0174086	13.5	19.34	0.18981	25.59	25.47	0.137371	28.62	22.29	0.173993	27.66	30.6	"Lysine ketoglutarate reductase trans-splicing related 1 (AHRD V1 ***- Q8H767_ARATH); contains Interpro domain(s) IPR007877 Protein of unknown function DUF707 "	-2.53769	-1.68164	-1.78628	-1.60643
Solyc02g078870.1.1	0.0016	48.34	79.79	0.00515	95.77	47.21	0.230408	84.52	207.07	0.0881169	186.99	44.35	Unknown Protein (AHRD V1)	-3.53793	-3.26837	-1.70129	-2.2187
Solyc02g078880.2.1	0.0556523	25.35	25.34	0.0353539	24.75	22.51	0.214625	31.3	37.94	0.0766989	32.72	30.41	"ATP-dependent RNA helicase (AHRD V1 ***- C4QVZ6_PICPG); contains Interpro domain(s) IPR011545 DNA/RNA helicase, DEAD/DEAH box type, N-terminal "	-1.97702	-2.19041	-1.58927	-1.7899
Solyc02g078890.1.1	0.560357	188.8	206.35	0.853989	248.16	228.99	0.0667598	110.01	136.44	0.0340565	162.16	57.34	Unknown Protein (AHRD V1)	-1.26471	-1.08082	-2.22116	-2.5864
Solyc02g078900.2.1	4.86e-05	39.58	33.98	0.0154845	78.23	58.63	0.0137814	83.54	44.4	0.00104	58.82	62.66	"NADH dehydrogenase (AHRD V1 **** Q38A31_9TRYP); contains Interpro domain(s) IPR013027 FAD-dependent pyridine nucleotide-disulphide oxidoreductase "	-4.17022	-2.33118	-2.62438	-2.85339
Solyc02g078950.2.1	3.39e-08	31.17	33.96	0.0013	11.46	18.73	0.453802	1.79	0.93	1	2.4	3.16	"Beta-galactosidase (AHRD V1 **** B9HYZ2_POPTR); contains Interpro domain(s) IPR001944 Glycoside hydrolase, family 35 "	11.7748	5.33973	-2.02645	-1.06625
Solyc02g079010.2.1	0.0104791	9.97	12.86	0.316478	34.43	10.97	0.443058	38.4	14.79	0.141841	21.13	22.97	"Cotton fiber expressed protein 1 (AHRD V1 ***- O81373_GOSHI); contains Interpro domain(s) IPR008480 Protein of unknown function DUF761, plant "	-3.14375	-1.65418	-1.47388	-1.83394
Solyc02g079100.2.1	6.78e-05	62.16	60.32	0.018642	30.53	40.88	0.527059	20.25	18.83	0.491538	20.2	19.3	"Riboflavin kinase (AHRD V1 **-* A8IM09_CHLRE); contains Interpro domain(s) IPR015865 Riboflavin kinase "	4.4322	2.51224	1.29703	1.27451
Solyc02g079170.2.1	7.34e-06	19.76	37.11	0.00339	67.4	35.26	0.0144893	78.3	49.91	0.000249	59.84	37.97	"NADH dehydrogenase like protein (AHRD V1 **** O65414_ARATH); contains Interpro domain(s) IPR013027 FAD-dependent pyridine nucleotide-disulphide oxidoreductase "	-5.2791	-3.01502	-2.53671	-3.44305
Solyc02g079220.2.1	0.0559599	336.99	332.81	0.00412	240.61	239.81	0.0100704	233.93	299.22	0.00524	332.37	247.81	"Solute carrier family 2, facilitated glucose transporter member 8 (AHRD V1 **** GTR8_HUMAN); contains Interpro domain(s) IPR003663 Sugar/inositol transporter "	-1.8601	-2.6787	-2.56673	-2.4279
Solyc02g079230.2.1	0.000644	27.13	26.76	0.0026	33.49	28.87	0.0377097	47.84	45.44	0.00559	43.25	38.78	"Vesicle-associated membrane family protein (AHRD V1 ***- D7MET3_ARALY); contains Interpro domain(s) IPR000535 Major sperm protein "	-3.39881	-3.03956	-2.15504	-2.52131
Solyc02g079280.2.1	0.000136	1.86	1.01	0.00376	5.93	0	0.000498	3.97	1.95	0.00059	3.79	3.27	"MYB transcription factor (AHRD V1 **-* Q9LDR8_ARATH); contains Interpro domain(s) IPR015495 Myb transcription factor "	-10.8458	-5.73327	-6.00336	-5.20984
Solyc02g079320.2.1	0.696669	6.26	6.21	0.486643	6.42	8.12	0.0372708	11.43	13.36	0.0274561	14.03	11.17	Unknown Protein (AHRD V1)	1.39429	1.57576	2.50903	2.47722
Solyc02g079330.2.1	1.17e-06	14.48	14.65	6.27e-06	19.84	10.16	0.00909	33.46	39.97	0.000933	31.65	35.43	"Equilibrative nucleoside transporter (AHRD V1 **** B9H1Z9_POPTR); contains Interpro domain(s) IPR002259 Delayed-early response protein/equilibrative nucleoside transporter "	-5.99375	-6.03848	-2.62061	-2.94193
Solyc02g079350.2.1	4.14e-05	7.59	4.61	0.00697	12.18	10.79	0.306445	29.11	16.84	0.36419	24.86	27.33	"Equilibrative nucleoside transporter (AHRD V1 **** B9H1Z9_POPTR); contains Interpro domain(s) IPR002259 Delayed-early response protein/equilibrative nucleoside transporter "	-5.16482	-2.86842	-1.52246	-1.38325
Solyc02g079360.1.1	0.807219	77.21	59.09	1.45e-05	12.2	13.61	3.4e-06	9.9	12.58	2.83e-05	13.65	21.64	"Octicosapeptide/Phox/Bem1p domain-containing protein (AHRD V1 *--- D7L8F8_ARALY); contains Interpro domain(s) IPR000270 Octicosapeptide/Phox/Bem1p "	-1.09555	-5.95243	-7.25173	-4.74654
Solyc02g079390.2.1	1.78e-09	14.59	17.11	2.05e-05	40.79	15.59	0.000776	24.59	60.53	0.000141	58.56	43.22	"Uncharacterized Cys-rich domain (AHRD V1 **-- Q2HTU7_MEDTR); contains Interpro domain(s) IPR006461 Protein of unknown function Cys-rich "	-9.66918	-5.66771	-3.97976	-3.41136
Solyc02g079410.2.1	0.0227744	29.54	20.92	0.0533054	27.14	31.88	0.040629	29.75	30.14	0.0233687	31.25	30	"Universal stress protein (Usp) (AHRD V1 *--- A2Q2X4_MEDTR); contains Interpro domain(s) IPR006016 UspA "	-2.29953	-2.0387	-2.13482	-2.14772
Solyc02g079440.1.1	0.00577	0.05	6.24	0.00391	5.07	1.22	0.0471036	7.24	10.49	0.268023	22.69	10.98	"FAD-binding domain-containing protein (AHRD V1 **-- D7MFH6_ARALY); contains Interpro domain(s) IPR006094 FAD linked oxidase, N-terminal "	-9.00862	-9.17039	-3.52032	-1.92817
Solyc02g079460.1.1	0.175805	0.15	0.75	1	3.85	2.87	0.00982	9.21	15.14	0.00214	27.48	9.61	"FAD-binding domain-containing protein (AHRD V1 **-- D7MFH6_ARALY); contains Interpro domain(s) IPR006094 FAD linked oxidase, N-terminal "	-5.62597	1.0334	3.41372	5.02935
Solyc02g079480.1.1	1	0.39	6.26	0.814101	4.55	2.34	0.242965	6.09	5.25	0.0202496	9.62	8.97	"FAD-binding domain-containing protein (AHRD V1 **-- D7MFH6_ARALY); contains Interpro domain(s) IPR006094 FAD linked oxidase, N-terminal "	1.31294	1.33028	2.02964	3.20026
Solyc02g079500.2.1	0.397548	3.12	0.69	0.0885764	6.97	1	1.35e-09	51.8	23.58	1.47e-10	27.15	37.34	"Peroxidase (AHRD V1 **** Q50LG4_TOBAC); contains Interpro domain(s) IPR019793 Peroxidases heam-ligand binding site IPR019794 Peroxidase, active site IPR002016 Haem peroxidase, plant/fungal/bacterial "	2.92517	5.67074	50.217	41.841
Solyc02g079530.2.1	1.78e-06	2.96	4.28	7.98e-05	7.43	3.48	8.21e-05	6.68	6.34	7.59e-06	6.89	5.24	"Serine/threonine-protein kinase receptor (AHRD V1 **** B6U2B7_MAIZE); contains Interpro domain(s) IPR002290 Serine/threonine protein kinase "	-7.77859	-5.39288	-4.79157	-5.28165
Solyc02g079540.1.1	0.0750379	13.33	10.39	0.000652	21.37	25.78	0.314787	3.04	2.21	0.180496	2.44	2.22	"Serine/threonine-protein kinase receptor (AHRD V1 **** B6U2B7_MAIZE); contains Interpro domain(s) IPR002290 Serine/threonine protein kinase "	2.28081	4.36703	-2.08348	-2.39488
Solyc02g079570.2.1	0.540836	70.48	47.75	0.462673	49.62	66.75	0.00546	33.18	21.8	1.39e-05	22.22	12.8	"Serine/threonine-protein kinase receptor (AHRD V1 **** B6U2B7_MAIZE); contains Interpro domain(s) IPR002290 Serine/threonine protein kinase "	-1.25222	-1.3191	-2.9559	-4.78847
Solyc02g079580.2.1	0.0445492	15.33	11.51	0.19372	9.49	24.11	0.00906	8.62	14.16	0.00182	13.27	8.21	"Receptor-like protein kinase (AHRD V1 **** Q9ZT06_ARATH); contains Interpro domain(s) IPR002290 Serine/threonine protein kinase "	-2.1089	-1.7331	-2.7271	-2.97359
Solyc02g079590.2.1	0.0137244	32.44	31.76	0.213914	51.78	49.15	0.503558	72.38	58.2	0.157707	54.94	53.27	"Serine/threonine kinase receptor (AHRD V1 **** Q7DMS5_BRANA); contains Interpro domain(s) IPR002290 Serine/threonine protein kinase "	-2.37687	-1.56464	-1.28106	-1.59138
Solyc02g079750.2.1	0.0582356	178.85	232.07	0.016419	164.97	179.34	0.0506895	204.19	207.25	0.00199	162.86	162.78	"Flavoprotein wrbA (AHRD V1 ***- B6U724_MAIZE); contains Interpro domain(s) IPR010089 Flavoprotein WrbA "	-1.84722	-2.26183	-2.01092	-2.61166
Solyc02g079760.2.1	0.0034	51.44	36.25	0.000297	34.7	34.93	2.71e-07	19.36	14.44	1.39e-09	17.66	13.4	"BHLH transcription factor-like protein (AHRD V1 *-*- Q5ZAK6_ORYSJ); contains Interpro domain(s) IPR011598 Helix-loop-helix DNA-binding "	-2.83836	-3.71023	-8.0625	-9.04582
Solyc02g079770.2.1	0.198878	23.72	25.32	0.0270628	36.8	37.56	0.203099	25.44	28.31	0.156737	27.95	28.72	DAG protein (AHRD V1 ***- B6TYI4_MAIZE)	1.60132	2.3507	1.60304	1.64506
Solyc02g079780.1.1	0.000666	17.9	13.56	1.58e-06	33.96	31.56	0.000396	21.09	15.05	1.82e-05	21.21	20.45	Pro-resilin (AHRD V1 *--- B6T4Q5_MAIZE)	4.73748	9.5005	4.96667	5.55423
Solyc02g079790.2.1	5.05e-05	11.25	20.01	2.19e-05	16.94	17.26	1.62e-07	29.41	24.07	4.25e-08	22.53	30.4	"POT family domain containing protein expressed (AHRD V1 ***- D8L9H8_WHEAT); contains Interpro domain(s) IPR007493 Protein of unknown function DUF538 "	8.9369	9.53421	14.0611	13.561
Solyc02g079800.1.1	0.0445725	1.84	16.42	0.00124	10.84	12.63	0.000611	23.5	7.2	0.00324	14.26	7.5	Unknown Protein (AHRD V1)	5.31804	6.84034	8.45815	5.84855
Solyc02g079870.2.1	0.131883	11.48	27.65	0.668097	17.33	8.84	2.51e-05	44.05	127.91	3.02e-05	61.42	50.04	Unknown Protein (AHRD V1)	1.87096	1.22522	7.48658	4.76068
Solyc02g079920.2.1	0.114321	3.48	5.84	0.133257	5.38	4.31	0.000859	1.94	1.82	0.00151	1.84	2.34	"Transcription factor (Fragment) (AHRD V1 *-** D6MKQ1_9ASPA); contains Interpro domain(s) IPR007087 Zinc finger, C2H2-type "	-2.19908	-2.18339	-5.69777	-5.30076
Solyc02g080050.1.1	1	4.27	3.59	0.00694	13.99	17.06	0.379488	16.85	1.57	0.667068	6.67	6.41	"Cysteine-rich receptor-like protein kinase (AHRD V1 ***- C6ZRS1_SOYBN); contains Interpro domain(s) IPR002902 Protein of unknown function DUF26 "	-1.05814	3.53453	1.99718	1.38812
Solyc02g080070.2.1	1	1.29	1.59	0.00231	8.84	13.06	6.65e-05	20.32	13.06	6.57e-05	16.33	12.22	RLK, Receptor like protein, putative resistance protein with an antifungal domain	-1.15011	5.96747	8.56433	7.13042
Solyc02g080080.2.1	1	0.19	0	1	0.53	0	0.0079	4.72	3.69	0.0157252	4.45	3.02	RLK, Receptor like protein, putative resistance protein with an antifungal domain	1.37527	2.36768	25.2082	22.0865
Solyc02g080120.1.1	0.000495	0.07	0.66	8.27e-05	0.46	0	0.00688	0.89	3.17	0.000501	0.78	1.94	"Gibberellin 2-beta-dioxygenase 7 (AHRD V1 **-* B6SZM8_MAIZE); contains Interpro domain(s) IPR005123 Oxoglutarate and iron-dependent oxygenase "	-20.6027	-29.1433	-5.13411	-7.60682
Solyc02g080130.2.1	0.0656612	52.08	58.32	0.201683	65	70.1	0.148816	54.47	77.5	0.0349757	67.28	49.98	"Chaperone dnaj-like protein (AHRD V1 ***- B7FX28_PHATR); contains Interpro domain(s) IPR003095 Heat shock protein DnaJ "	-1.85171	-1.55855	-1.69886	-1.96538
Solyc02g080160.2.1	1	0.42	1.28	0.65835	3.51	0	0.00395	11.59	4.92	0.000753	8.36	10.15	"Xyloglucan endotransglucosylase/hydrolase 1 (AHRD V1 **** C0IRG0_9ERIC); contains Interpro domain(s) IPR016455 Xyloglucan endotransglucosylase/hydrolase "	1.21102	2.25716	9.60357	10.4504
Solyc02g080190.2.1	0.441802	2.07	2.32	0.827215	4.83	1.84	0.00327	13.55	22.81	0.0106538	18	11.66	"Nuclear transport factor 2 (AHRD V1 ***- B3TLR5_ELAGV); contains Interpro domain(s) IPR018222 Nuclear transport factor 2, Eukaryote "	-1.84738	-1.27661	3.89301	3.08875
Solyc02g080200.2.1	0.107383	4.76	11.72	0.443001	15.83	14.49	0.0161228	68.97	157.35	0.0180455	102.5	91.13	"Pectinesterase (AHRD V1 ***- B9RXQ4_RICCO); contains Interpro domain(s) IPR000070 Pectinesterase, catalytic "	-2.89283	-1.61495	4.3012	3.59511
Solyc02g080210.2.1	0.480986	17.34	20.35	0.194393	19.73	5.69	0.0403778	63.85	136.58	0.0510938	69.09	106.98	"Pectinesterase (AHRD V1 ***- B9RXQ4_RICCO); contains Interpro domain(s) IPR000070 Pectinesterase, catalytic "	-1.49391	-2.29419	3.22387	2.78337
Solyc02g080220.2.1	0.624152	17.19	25.45	0.16173	10.47	7.47	0.000368	44.81	230.19	0.00259	45.14	83.81	"Pectinesterase (AHRD V1 ***- B9RXQ4_RICCO); contains Interpro domain(s) IPR000070 Pectinesterase, catalytic "	1.24979	-1.93916	7.31203	3.38819
Solyc02g080290.2.1	0.0242657	12.76	17.97	0.0317419	19.89	12.22	0.732396	34.63	35.64	0.674496	35.99	34.77	"Beta-glucosidase 47 (AHRD V1 **** D7MEP5_ARALY); contains Interpro domain(s) IPR001360 Glycoside hydrolase, family 1 "	-2.40033	-2.37146	-1.15046	-1.17386
Solyc02g080310.2.1	0.342759	3.87	6.45	0.0454275	13.43	5.34	0.227003	6.82	5.42	0.0446486	6.38	11.44	"Beta-glucosidase 47 (AHRD V1 **** D7MEP5_ARALY); contains Interpro domain(s) IPR001360 Glycoside hydrolase, family 1 "	1.92443	3.33894	2.09124	2.94498
Solyc02g080370.2.1	0.150089	53.07	47.43	0.202014	52.55	56.68	0.00148	29.83	24	0.00164	33.56	31.93	"Tobamovirus multiplication protein (Fragment) (AHRD V1 ***- B0ZZ80_ARAHY); contains Interpro domain(s) IPR009457 Protein of unknown function DUF1084 "	-1.64916	-1.56908	-3.36714	-2.85324
Solyc02g080390.2.1	0.634654	0.47	0.57	1	1.84	1.55	0.0568663	6.97	7.13	0.0496185	7.64	6.77	"Abnormal spindle-like microcephaly-associated protein (Fragment) (AHRD V1 *-*- B6UL97_HYLME); contains Interpro domain(s) IPR016146 Calponin-homology "	-2.90395	-1.0567	3.50787	3.48416
Solyc02g080400.1.1	0.228343	0.49	0.3	0.615441	3.6	5.24	0.00491	11.33	13.02	0.0065	12.3	10.63	"Abnormal spindle-like microcephaly-associated protein homolog (AHRD V1 *-*- ASPM_MOUSE); contains Interpro domain(s) IPR016024 Armadillo-type fold "	-5.27914	1.59358	4.06528	3.73052
Solyc02g080410.2.1	0.0561246	101.73	80.25	0.0247158	92.08	70.84	0.0115064	25.58	97.06	9.59e-05	55.95	40.28	"class I heat shock protein (AHRD V1 ***- Q69BI7_CARPA); contains Interpro domain(s) IPR008978 HSP20-like chaperone "	-2.10919	-2.45139	-3.47752	-4.52322
Solyc02g080450.1.1	0.0222816	2.36	20.35	0.204052	25.48	15.1	0.00112	11.27	8.12	0.124093	14.55	25.88	Unknown Protein (AHRD V1)	-2.8342	-1.61745	-3.54445	-1.75509
Solyc02g080480.2.1	5.56e-05	42.56	58.03	0.0057	29.5	33.47	0.26734	8.13	5.43	0.181757	5.53	7.33	"Multidrug resistance protein mdtK (AHRD V1 **-- MDTK_EDWI9); contains Interpro domain(s) IPR002528 Multi antimicrobial extrusion protein MatE "	4.88471	2.98707	-1.6236	-1.75583
Solyc02g080510.1.1	0.000892	33.88	28.39	0.209351	11.49	20.09	1	5.65	13.31	0.744221	6.39	10.5	"Arabidopsis thaliana genomic DNA chromosome 5 P1 clone MOK16 (AHRD V1 *-*- Q9LYW2_ARATH); contains Interpro domain(s) IPR007608 Protein of unknown function DUF584 "	3.51462	1.73601	-1.01781	-1.16772
Solyc02g080520.2.1	0.0134696	8.3	6.93	0.121399	4.74	5.63	0.727014	2.71	3.01	0.726896	2.68	2.65	Os04g0625000 protein (Fragment) (AHRD V1 *-*- Q0J9Y7_ORYSJ)	5.04862	3.36183	1.78758	1.62979
Solyc02g080530.2.1	4.05e-06	255.2	243.81	1.4e-05	253.92	244.83	2.73e-08	535.45	457.67	6.74e-10	432.87	483.04	"Peroxidase (AHRD V1 **** C7DYB2_9ERIC); contains Interpro domain(s) IPR002016 Haem peroxidase, plant/fungal/bacterial "	4.90309	4.73872	8.90654	7.98913
Solyc02g080550.1.1	0.0231187	3.72	7.32	0.0562842	11.19	0	0.85714	16.47	28.15	0.776243	23.48	12.06	Unknown Protein (AHRD V1)	-3.27803	-3.3545	1.11065	-1.16343
Solyc02g080560.1.1	3.11e-09	0	0	0.000607	6.32	2.21	0.43772	25.77	34.91	0.836264	29.04	21.24	Unknown Protein (AHRD V1)	-159.797	-4.83294	1.35338	1.09071
Solyc02g080600.1.1	0.00168	76.78	156.03	0.144779	44.78	56.38	0.0366669	50.94	103.62	0.110733	62.57	48.63	Unknown Protein (AHRD V1)	4.70877	2.01843	2.87859	2.02523
Solyc02g080610.2.1	0.500925	0.9	1.49	0.259625	1.71	0.98	0.000664	8.59	7.62	0.000284	8.79	8.28	"Ankyrin repeat domain-containing protein 13C-A (AHRD V1 **** C0H9Z7_SALSA); contains Interpro domain(s) IPR002110 Ankyrin "	4.46073	4.85179	25.8915	26.6624
Solyc02g080630.2.1	0.55127	87.01	88.25	0.236361	126.82	96.98	0.00782	214.92	198.42	0.00656	190.15	187.48	"Lactoylglutathione lyase (AHRD V1 ***- D2D330_GOSHI); contains Interpro domain(s) IPR004361 Glyoxalase I "	1.22487	1.51004	2.63697	2.34147
Solyc02g080640.2.1	7.33e-06	17.35	17.29	0.000323	28.58	22.23	0.0148161	47.36	37.14	0.0647567	55.13	63.9	"Phosphoadenosine phosphosulfate reductase (AHRD V1 *-** B7I7M3_ACIB5); contains Interpro domain(s) IPR013766 Thioredoxin domain "	-5.6726	-4.01124	-2.5536	-1.86566
Solyc02g080660.2.1	0.827125	2.02	7.51	0.698985	8.37	3.68	0.0705451	9.91	10.59	0.00327	13.72	15.53	"Glucan endo-1 3-beta-glucosidase 3 (AHRD V1 ***- B6UBU1_MAIZE); contains Interpro domain(s) IPR012946 X8 "	1.22981	1.50428	2.40105	3.3205
Solyc02g080670.2.1	0.100695	0.34	15.08	0.86391	38.22	30.33	0.0151706	5.36	4.08	0.417979	28.53	18.04	"Laccase-22 (AHRD V1 **-- LAC22_ORYSJ); contains Interpro domain(s) IPR001117 Multicopper oxidase, type 1 "	-5.01958	-1.14367	-8.56593	-1.83675
Solyc02g080770.2.1	0.00876	2.49	23.07	0.00281	9.59	11.52	0.00762	6.25	11.22	0.000277	9.06	14.02	Unknown Protein (AHRD V1)	7.64472	6.28398	4.91294	6.30553
Solyc02g080790.2.1	0.179166	0.23	3.31	0.858136	7.66	0	2.18e-06	37.21	53.55	6.36e-07	34.22	45.82	"Deoxyhypusine synthase (AHRD V1 ***- Q5ZN61_9ASTE); contains Interpro domain(s) IPR002773 Deoxyhypusine synthase "	-2.59804	-1.29244	8.45084	7.2882
Solyc02g080830.1.1	0.000211	42.47	31.52	0.0918659	12.22	21.57	0.646888	7.49	4.36	0.388952	4.61	5.03	F-box-like (AHRD V1 ***- Q6H6K1_ORYSJ)	5.11245	2.26708	-1.31568	-1.65103
Solyc02g080900.2.1	0.333436	2.96	2.66	1	4.94	5.26	0.0193957	15.66	13.59	0.0384948	14.04	12.75	Genomic DNA chromosome 5 TAC clone K6A12 (AHRD V1 **-- Q9FGR6_ARATH)	-1.74752	-1.01302	2.63097	2.34579
Solyc02g080920.1.1	2.84e-05	26.73	10.96	0.000685	30.36	31.84	5.23e-13	3.96	1.46	3.76e-13	8.02	2.37	"Stig1 (Fragment) (AHRD V1 *-*- Q9SBR0_PETHY); contains Interpro domain(s) IPR006969 Stigma-specific protein Stig1 "	-5.34415	-3.39259	-39.4322	-21.7948
Solyc02g080930.1.1	2.65e-07	5.71	2.47	1.66e-05	8.91	2.69	9.24e-12	1.39	0.44	1.15e-10	3.64	1.12	"Stig1 (Fragment) (AHRD V1 *-*- Q9SBR0_PETHY); contains Interpro domain(s) IPR006969 Stigma-specific protein Stig1 "	-9.3353	-6.91575	-41.1718	-17.7008
Solyc02g081030.2.1	7.07e-11	22.2	32.76	5.15e-06	75.71	20.04	5.03e-05	97.36	75.84	0.000125	104.26	132.91	"Uncharacterized membrane protein C2G11.09 (AHRD V1 **-- YAB9_SCHPO); contains Interpro domain(s) IPR003864 Protein of unknown function DUF221 "	-15.6953	-9.38099	-5.4265	-4.07373
Solyc02g081040.2.1	0.000665	8.21	6.32	0.0056	8.68	10.51	8.87e-05	7.09	5.24	0.000487	8.79	8.86	"Receptor-like kinase (AHRD V1 *-** A7VM33_MARPO); contains Interpro domain(s) IPR002290 Serine/threonine protein kinase "	-3.91881	-3.07955	-5.04182	-3.6451
Solyc02g081050.2.1	0.000326	45.31	48.11	0.0928888	13.02	40.26	0.00057	2.12	0.85	0.00225	3.36	2.69	"Receptor-like kinase (AHRD V1 *-** C6ZRP5_SOYBN); contains Interpro domain(s) IPR002290 Serine/threonine protein kinase "	4.06537	2.27162	-7.77094	-4.0821
Solyc02g081070.2.1	0.324502	7.35	31.97	0.433037	25.56	9.34	0.00417	44.86	40.33	0.001	48.14	45.31	Receptor like kinase, RLK	1.68114	1.46422	3.38269	3.5978
Solyc02g081150.1.1	0.00999	3.76	2.58	0.0625959	4.72	5	0.107178	6.32	7.04	0.0873702	7.37	6.23	Unknown Protein (AHRD V1)	-3.73265	-2.54397	-1.98263	-2.00669
Solyc02g081170.2.1	0.00123	33.77	26.85	0.00216	29.03	31.2	0.884258	10.31	5.63	0.615932	8.13	5.88	"Plastid-lipid-associated protein, chloroplastic (AHRD V1 **-- PAP_CITUN); contains Interpro domain(s) IPR006843 PAP fibrillin "	3.67173	3.52269	-1.1203	-1.30595
Solyc02g081180.1.1	0.00811	35.72	36.45	0.928336	11.17	19.31	4.75e-05	2	1.54	0.00167	5.03	3.08	"Zinc finger family protein (AHRD V1 *--- D7MVE2_ARALY); contains Interpro domain(s) IPR001841 Zinc finger, RING-type "	2.65729	1.09733	-7.84334	-3.66825
Solyc02g081190.2.1	0.00394	232.15	241.11	0.000861	207.35	185.81	0.059049	385.16	300.28	0.000645	256.1	199.08	"1-aminocyclopropane-1-carboxylate oxidase (AHRD V1 ***- Q9ZWP2_SOLLC); contains Interpro domain(s) IPR005123 Oxoglutarate and iron-dependent oxygenase "	-2.74213	-3.41023	-2.06902	-3.21854
Solyc02g081210.2.1	0.00273	1.53	1.87	0.177734	5.53	4.58	0.372896	14.13	17.75	0.528326	15.27	14.21	"Expansin (AHRD V1 ***- Q9ZP33_SOLLC); contains Interpro domain(s) IPR002963 Expansin "	-5.5564	-2.02073	1.4478	1.30534
Solyc02g081220.1.1	3.97e-08	13.03	20.83	1	1.22	0	0.0627585	1.92	3.24	0.250229	1.11	1.85	Unknown Protein (AHRD V1)	132.008	5.67122	20.1991	11.8718
Solyc02g081240.1.1	2.75e-36	1218.53	1328.88	3.5e-21	251.59	452.5	1	0.76	0.33	1.68e-08	19.13	16.29	"Glutathione S-transferase (AHRD V1 **** A1YW90_VITVI); contains Interpro domain(s) IPR004046 Glutathione S-transferase, C-terminal "	2679.48	727.048	1.31628	33.8539
Solyc02g081300.2.1	0.255586	3.5	4.59	0.522984	8.34	2.67	0.0190125	20.41	21.71	0.305121	14.11	12.29	"Sucrose synthase (AHRD V1 **** Q9FHU4_ARATH); contains Interpro domain(s) IPR012820 Sucrose synthase, plants and cyanobacteria "	-1.85724	-1.42359	2.50126	1.52956
Solyc02g081330.2.1	0.000108	17.61	13.88	0.000328	11.78	22.09	0.555011	4.24	3.71	1	2.55	3.02	Phytoene synthase 2	7.62165	7.94673	1.80944	1.25079
Solyc02g081430.2.1	0.0290177	119.39	163	0.0335223	129.88	155.71	0.0511929	175.28	134.49	0.041202	188.37	156.96	"Microsomal glutathione S-transferase 3 (AHRD V1 **** B4FLH3_MAIZE); contains Interpro domain(s) IPR001129 Membrane-associated, eicosanoid and glutathione metabolism (MAPEG) "	-2.09199	-2.11813	-2.07201	-1.91908
Solyc02g081440.2.1	0.0471582	1.1	0.95	0.505302	5.04	3.3	1	8.06	8.08	0.44067	14.03	11.51	Os02g0638200 protein (Fragment) (AHRD V1 *-*- Q0DZ92_ORYSJ)	-6.53687	-1.8154	-1.01186	1.50454
Solyc02g081450.2.1	0.00631	64.14	55.1	0.011173	48.14	71.2	0.786304	34.49	17.15	0.603435	19.99	18.71	"NHL1 (Fragment) (AHRD V1 *--- B0LZI0_ARATH); contains Interpro domain(s) IPR010847 Harpin-induced 1 "	2.86128	2.77585	1.13603	-1.20859
Solyc02g081560.1.1	0.0224452	60.1	35.24	0.00454	38.88	101.28	0.445928	24.76	3.61	0.245067	10.9	18.19	Unknown Protein (AHRD V1)	2.41942	3.44332	-1.51232	-1.52593
Solyc02g081600.2.1	1.44e-09	28.63	41.66	0.0385102	7.78	5.71	1	2.81	1.78	0.267803	4.65	5.42	"Zinc transporter protein (AHRD V1 **** D5LMF9_9FABA); contains Interpro domain(s) IPR004698 Zinc/iron permease, fungal and plant "	19.1595	3.63541	1.21629	2.51932
Solyc02g081690.1.1	1.45e-07	50.41	57.01	0.00326	15.69	29.97	0.123214	16.02	9.88	0.0655694	13.82	12.77	"Glucosyltransferase (AHRD V1 **** Q94IF2_TOBAC); contains Interpro domain(s) IPR002213 UDP-glucuronosyl/UDP-glucosyltransferase "	9.06122	3.77406	2.01555	2.00551
Solyc02g081800.1.1	1.35e-14	53.14	59.19	9.1e-05	8.17	9.63	1	0.03	0	0.0626907	4.17	0.92	"Acyltransferase (Fragment) (AHRD V1 **-- C1JZ77_9SOLA); contains Interpro domain(s) IPR003480 Transferase "	437.205	69.2027	1.10829	19.7196
Solyc02g081810.2.1	0.00635	16.2	27.11	0.22012	42.48	41.21	0.871589	83.66	72.23	0.526355	103.06	86.68	"tRNA pseudouridine synthase B (AHRD V1 *-*- TRUB_PELTS); contains Interpro domain(s) IPR004802 Pseudouridine synthase, putative "	-3.08952	-1.64233	1.06921	1.26105
Solyc02g081830.2.1	0.0252571	5.26	5.49	0.424391	11.1	12.94	0.345744	11.27	56.36	1	16.93	21.51	"HAD-superfamily hydrolase (AHRD V1 ***- D5A3P4_SPIPL); contains Interpro domain(s) IPR011949 HAD-superfamily hydrolase, subfamily IA, REG-2-like "	-3.25739	-1.51988	1.71717	-1.04187
Solyc02g081880.2.1	0.019703	91.65	80.4	0.0834425	60.33	90.52	0.788548	43.27	50.42	1	45.36	41.87	"Molybdenum cofactor sulfurase protein-like (AHRD V1 **-- Q653D7_ORYSJ); contains Interpro domain(s) IPR005303 MOSC, N-terminal beta barrel "	2.23656	1.90352	1.10919	1.00476
Solyc02g082020.2.1	0.0469745	37.63	34.11	0.233666	42.12	53.57	0.722963	64.54	72.97	0.80686	89.7	58.88	Unknown Protein (AHRD V1)	-1.98046	-1.5329	-1.13649	-1.08504
Solyc02g082060.1.1	0.879706	23.68	10.8	0.0168347	7.14	2.05	0.0888566	25.4	48.11	1	20.15	14.59	"PPPDE peptidase domain-containing protein 1 (AHRD V1 *--- PPDE1_XENLA); contains Interpro domain(s) IPR008580 Protein of unknown function DUF862, eukaryotic "	1.08821	-3.54148	2.07847	-1.03643
Solyc02g082090.2.1	0.0355905	0	26.84	0.0418064	7.31	5.95	1	1.18	1.91	1	1.69	0.47	"Peroxidase (AHRD V1 **** Q5W5I3_PICAB); contains Interpro domain(s) IPR002016 Haem peroxidase, plant/fungal/bacterial "	7.71895	3.83054	-1.11485	-1.57995
Solyc02g082170.1.1	1.37e-06	12.23	18.78	0.0138483	3.22	9.56	1	0.46	0.76	1	1.33	2.15	"Purine permease (AHRD V1 *--* B6TET5_MAIZE); contains Interpro domain(s) IPR004853 Protein of unknown function DUF250 "	18.8151	7.69123	-1.20772	2.03102
Solyc02g082180.2.1	0.0235609	1.54	4.2	0.84787	12.41	8.57	0.058013	28.83	28.52	0.0259514	30.74	33.1	"DNA replication licensing factor (AHRD V1 ***- Q2TWS7_ASPOR); contains Interpro domain(s) IPR008049 MCM protein 6 "	-3.90393	-1.13342	2.25965	2.44308
Solyc02g082200.2.1	0.0156048	47.6	43.81	0.196258	23.51	44.43	0.565832	25.37	27.44	0.5348	28	26.37	"Glutaredoxin (AHRD V1 ***- A9LC71_PTEVI); contains Interpro domain(s) IPR004480 Glutaredoxin-related protein "	2.38055	1.72331	1.25588	1.25761
Solyc02g082240.1.1	0.13366	7.69	6.88	0.033534	7.03	0	0.22075	11.1	7.45	0.169179	11.41	7.85	Unknown Protein (AHRD V1)	-2.08422	-4.44609	-1.79583	-1.78317
Solyc02g082250.2.1	0.0127448	23.2	27.21	0.0200497	28.81	25.01	0.139229	35.49	41.32	0.103192	44.13	35.74	"Thioredoxin reductase (AHRD V1 **** B9SRA3_RICCO); contains Interpro domain(s) IPR005982 Thioredoxin reductase "	-2.38769	-2.30681	-1.717	-1.69917
Solyc02g082270.2.1	0.0234975	93.1	77.01	0.177572	73.43	57.86	0.31978	64.43	58.76	0.592619	48.34	55.84	"RNA-binding protein 68390-68829 (AHRD V1 *--* Q9C805_ARATH); contains Interpro domain(s) IPR000504 RNA recognition motif, RNP-1 "	2.1925	1.62933	1.44602	1.19042
Solyc02g082350.2.1	1.42e-07	17.23	23.36	4.64e-06	32.01	16.96	0.000117	38.47	32.57	8.07e-06	35.57	37.49	Lrr, resistance protein fragment	-6.88879	-5.90762	-4.29859	-4.30042
Solyc02g082420.2.1	0.00516	3.09	1.79	0.327545	15.34	4.56	0.306737	6.5	15.52	0.164416	7.33	11.25	"Ring finger protein (AHRD V1 *-*- O49869_HORVU); contains Interpro domain(s) IPR018957 Zinc finger, C3HC4 RING-type "	-6.93786	-1.84989	-1.76892	-2.13699
Solyc02g082430.2.1	1.32e-05	27.62	25.36	0.000175	41	20.4	5.68e-06	24.89	22.18	9.4e-07	27.92	24.77	"MLO-like protein 3 (AHRD V1 ***- C6EWE6_VITVI); contains Interpro domain(s) IPR004326 Mlo-related protein "	-4.90864	-4.41109	-6.05121	-5.57021
Solyc02g082450.2.1	0.000304	0.65	2.64	0.00161	3.29	1.05	0.306558	9.5	9.87	0.0610952	11.28	1.33	"Auxin efflux carrier family protein (AHRD V1 **** D7L9F0_ARALY); contains Interpro domain(s) IPR004776 Auxin efflux carrier "	-7.84263	-6.23681	-1.54879	-2.43851
Solyc02g082480.2.1	0.0762437	14.03	15.31	0.488858	11.57	8.87	0.0141162	19.62	18.63	0.0220608	18.16	18.51	"Glutamate-gated kainate-type ion channel receptor subunit GluR5 (AHRD V1 **** B9H686_POPTR); contains Interpro domain(s) IPR017103 Ionotropic glutamate-like receptor, plant "	2.09962	1.42255	2.49975	2.33152
Solyc02g082510.1.1	0.103915	70.8	63.91	0.245792	100.54	61.15	0.0844286	68.5	68.19	0.0471666	65.77	72.31	"Amino acid transporter family protein (AHRD V1 **** D7LI10_ARALY); contains Interpro domain(s) IPR013057 Amino acid transporter, transmembrane "	-1.80487	-1.56514	-1.95287	-1.98534
Solyc02g082550.2.1	0.442371	36.84	24.76	0.808211	15.12	37.88	0.107036	16.24	9.68	0.00192	9.35	6.83	"Kinase family protein (AHRD V1 ***- D7MD00_ARALY); contains Interpro domain(s) IPR002290 Serine/threonine protein kinase "	1.36265	1.1377	-1.90508	-3.12306
Solyc02g082560.1.1	0.00201	0.53	0	0.114787	4.82	4.21	0.0885603	3.38	6.97	0.0392508	3.51	4.44	"CTP synthase-like protein (AHRD V1 ***- Q8L6Z9_ARATH); contains Interpro domain(s) IPR000991 Glutamine amidotransferase class-I, C-terminal "	-37.5446	-3.28131	-3.0484	-4.02608
Solyc02g082570.1.1	0.500412	32.84	38.22	0.152012	26.39	28.24	0.0965122	26.1	27.35	0.0284458	24.9	23.87	Unknown Protein (AHRD V1)	-1.27148	-1.70017	-1.84529	-2.07746
Solyc02g082630.2.1	0.00128	3.83	5.59	0.000164	3.98	1.04	0.000499	5.88	3.38	0.00524	6.33	9.38	"Phosphoinositide phosphatase family protein (AHRD V1 *-*- D7LTV1_ARALY); contains Interpro domain(s) IPR002013 Synaptojanin, N-terminal "	-5.04589	-9.57656	-5.58499	-3.42078
Solyc02g082650.2.1	0.00226	10.19	3.62	0.00137	9.92	0	0.0840386	19.98	11.6	0.157492	19.16	19.88	Unknown Protein (AHRD V1)	-4.32731	-6.3154	-2.10541	-1.75705
Solyc02g082670.2.1	0.254422	23.39	26.81	0.120457	38.37	24.92	0.00117	65.06	61.72	0.00172	54.48	56.3	"WUSCHEL-related homeobox 14 (AHRD V1 ***- B6T910_MAIZE); contains Interpro domain(s) IPR001356 Homeobox "	1.53853	1.87206	3.54355	3.01489
Solyc02g082680.2.1	0.0118774	4.83	11.82	0.00201	7.64	5.6	0.0139577	7.99	11.54	0.0117325	11.82	9.64	Unknown Protein (AHRD V1)	-2.83765	-3.64289	-2.63574	-2.46509
Solyc02g082690.2.1	0.0438552	14.46	11.14	0.42548	11.13	5.69	0.453406	8.28	7.81	0.560785	7.67	8.47	"Syntaxin binding protein 5 (Tomosyn) (AHRD V1 *--- Q14DD4_HUMAN); contains Interpro domain(s) IPR011046 WD40 repeat-like "	2.49403	1.58832	1.44085	1.40637
Solyc02g082740.1.1	2.32e-06	23.23	11.31	0.000122	9.97	11.46	5.61e-08	42.93	15.31	1.95e-13	44.08	45.16	"Dirigent-like protein 1 (AHRD V1 ***- D2DMN2_GOSHI); contains Interpro domain(s) IPR004265 Plant disease resistance response protein "	38.1342	22.9251	59.1541	87.7901
Solyc02g082760.2.1	0.30353	168.54	152.05	0.939782	101.75	120.58	0.0264989	54.07	48.08	0.0987754	70.92	71.2	"Catalase (AHRD V1 **** O24511_TOBAC); contains Interpro domain(s) IPR018028 Catalase related subgroup "	1.44078	-1.03325	-2.38526	-1.76596
Solyc02g082820.2.1	1	0.15	1.03	0.242936	3.18	1.64	0.00857	7.47	6.55	0.000135	11.59	9.42	"Cyclin B2 (AHRD V1 **** Q9XGI1_SOLLC); contains Interpro domain(s) IPR014400 Cyclin, A/B/D/E IPR006671 Cyclin, N-terminal "	-1.2091	2.82961	7.53209	10.9348
Solyc02g082830.1.1	0.0174024	25.87	37.13	0.0527146	45.41	27.3	0.607696	59.34	69.87	0.37852	63.07	58.58	"Phosphoserine aminotransferase (AHRD V1 **** B9H657_POPTR); contains Interpro domain(s) IPR003248 Phosphoserine aminotransferase "	-2.28076	-2.03951	-1.21498	-1.3259
Solyc02g082850.2.1	0.00237	19.6	15.06	0.0712741	11.58	11.09	0.80705	4.02	3.93	1	5.01	4.02	"Serine O-acetyltransferase (AHRD V1 **** Q21LT3_SACD2); contains Interpro domain(s) IPR005881 Serine O-acetyltransferase "	3.751	2.38061	-1.24295	-1.129
Solyc02g082880.2.1	0.129676	2.28	2.24	1	1.26	0	8.58e-06	16.26	7.39	0.000993	6.85	5.48	"Acyl-CoA synthetase/AMP-acid ligase II (AHRD V1 **** Q2W3Z0_MAGSA); contains Interpro domain(s) IPR000873 AMP-dependent synthetase and ligase "	9.95159	3.09501	46.8674	24.1085
Solyc02g082900.2.1	0.807288	63.2	59.6	0.469764	56.48	50.84	0.00432	28.54	21.38	0.00806	32.63	30.72	"Strictosidine synthase family protein (AHRD V1 **-- D7LTU8_ARALY); contains Interpro domain(s) IPR004141 Strictosidine synthase "	-1.08859	-1.28861	-2.92219	-2.37541
Solyc02g082910.2.1	0.00212	1.63	2.24	0.0790906	6.25	3.26	0.00664	5.6	1.44	0.0145183	6.11	2.97	"Acyl-CoA synthetase/AMP-acid ligase II (AHRD V1 **** D0C359_9GAMM); contains Interpro domain(s) IPR000873 AMP-dependent synthetase and ligase "	-5.62953	-2.45574	-3.47528	-2.7977
Solyc02g082920.2.1	0.618851	2.57	2.35	9.01e-06	75.29	23.7	0.236309	12.41	4.81	0.00815	33.12	6.43	"Endochitinase (Chitinase) (AHRD V1 **** Q43184_SOLTU); contains Interpro domain(s) IPR000726 Glycoside hydrolase, family 19, catalytic "	-1.55769	11.7493	1.99033	4.32873
Solyc02g082930.2.1	0.500448	0.54	1.24	0.000726	14.6	3.24	1	1.15	0.12	0.250229	3.21	0.35	"Endochitinase (Chitinase) (AHRD V1 **** Q43184_SOLTU); contains Interpro domain(s) IPR016283 Glycoside hydrolase, family 19 IPR000726 Glycoside hydrolase, family 19, catalytic "	2.90754	24.9637	2.03668	4.97335
Solyc02g082960.2.1	1.2e-06	24.69	12.35	0.0182601	3.32	8.28	0.62531	2.79	0.91	1	1.58	1	"Endochitinase (Chitinase) (AHRD V1 **** Q43184_SOLTU); contains Interpro domain(s) IPR000726 Glycoside hydrolase, family 19, catalytic "	51.8846	15.9828	5.09056	3.57749
Solyc02g083110.1.1	0.306035	2.35	1.69	0.59264	7.88	5.51	7.67e-05	26.4	23.81	0.000179	22.29	21.55	"UNE1-like protein (AHRD V1 ***- B2ZAS0_9ROSI); contains Interpro domain(s) IPR006943 Protein of unknown function DUF641, plant "	-2.16551	1.42061	4.96398	4.21111
Solyc02g083120.1.1	0.06053	0.26	1.42	0.454406	5.75	0.69	0.0481321	11.97	15.88	0.137058	10.33	12.67	"CM0216.240.nc protein (AHRD V1 ***- B0BLH5_LOTJA); contains Interpro domain(s) IPR004320 Protein of unknown function DUF241, plant "	-5.63065	-1.69257	2.36541	1.91008
Solyc02g083130.2.1	0.123111	1.29	0.95	0.460176	8.65	4.47	5.98e-05	22.99	27.16	0.000599	19.16	17.85	"IST1 homolog (AHRD V1 *--- C1BSR8_9MAXI); contains Interpro domain(s) IPR005061 Protein of unknown function DUF292, eukaryotic "	-3.38668	1.53288	5.45992	3.92895
Solyc02g083160.1.1	3.31e-19	112.41	112.52	1.1e-10	28.05	28.03	1	0	0	0.125229	2.74	1.56	"GDSL esterase/lipase At5g33370 (AHRD V1 ***- GDL79_ARATH); contains Interpro domain(s) IPR001087 Lipase, GDSL "	876.311	215.734	1	16.7941
Solyc02g083200.2.1	0.33715	67.56	32.75	0.820783	31.86	134.73	0.0287325	41.31	28.54	0.0615981	41.4	48.73	Unknown Protein (AHRD V1)	-1.44505	1.11311	-2.29451	-1.83149
Solyc02g083240.2.1	0.023542	3.89	3.91	0.843276	11.01	13.03	0.163362	7.37	8.08	0.404213	13.06	8.39	"DNA-directed RNA polymerase (Fragment) (AHRD V1 ***- Q1L5Y6_SOLLC); contains Interpro domain(s) IPR007066 RNA polymerase Rpb1, domain 3 "	-3.27095	-1.11818	-1.83329	-1.36426
Solyc02g083250.2.1	7.13e-05	22.12	24.41	0.00409	49.59	28.58	0.315695	44.88	141.33	0.0905167	82.58	75.59	"Cellular retinaldehyde-binding/triple function C-terminal (AHRD V1 **-- B6SN40_MAIZE); contains Interpro domain(s) IPR001251 Cellular retinaldehyde-binding/triple function, C-terminal "	-5.93512	-3.67024	-1.64243	-1.97274
Solyc02g083280.2.1	0.0736185	19.48	8.28	0.085748	13.93	16.98	0.0248555	11.19	10.55	0.0739656	24.63	7.18	"Thiosulfate sulfurtransferase/rhodanese-like domain-containing protein 1 (AHRD V1 *--* TSTD1_HUMAN); contains Interpro domain(s) IPR001763 Rhodanese-like "	-3.81461	-3.58718	-5.39993	-3.85163
Solyc02g083310.2.1	0.0283135	11.49	12.51	0.0645035	19.97	8.04	0.693077	20.12	44.04	0.611074	35.66	27.8	"Wound responsive protein (Fragment) (AHRD V1 *--- A6N0L4_ORYSI); contains Interpro domain(s) IPR003729 Protein of unknown function DUF151 "	-3.00299	-2.67703	-1.24329	-1.28935
Solyc02g083340.2.1	0.0937561	8.46	8.66	0.15101	9.59	6.82	0.0290086	10.32	11.18	0.030406	10.11	10.49	"Phospholipase D (AHRD V1 **** Q6AVR2_ORYSJ); contains Interpro domain(s) IPR011402 Phospholipase D, plant "	2.39525	2.22575	2.74515	2.56174
Solyc02g083380.2.1	0.00133	321.28	265.01	0.251863	106.34	203.12	0.10499	59.35	58.78	0.110169	64.77	66.58	Unknown Protein (AHRD V1)	3.01956	1.54879	-1.80526	-1.66889
Solyc02g083390.2.1	0.0379434	14.27	20.91	0.544827	39.22	24.69	0.947575	45.77	43.94	1	44.55	45.32	"Prolyl 4-hydroxylase alpha subunit-like protein (AHRD V1 ***- Q9FKX6_ARATH); contains Interpro domain(s) IPR006620 Prolyl 4-hydroxylase, alpha subunit "	-2.24367	-1.27762	1.0393	1.01194
Solyc02g083410.2.1	0.0150847	11.55	9.89	0.176426	5.81	9.01	1	2.72	3.35	1	2.7	2.61	"Receptor-like kinase (AHRD V1 *-*- A7VM40_MARPO); contains Interpro domain(s) IPR002290 Serine/threonine protein kinase "	3.58086	2.41527	-1.04551	-1.21969
Solyc02g083420.2.1	0.000196	26.85	23.43	0.00212	37.76	25.53	0.000671	31.2	26.39	0.000304	33.28	32.24	"Protein phosphatase 2C (AHRD V1 ***- B6SYG9_MAIZE); contains Interpro domain(s) IPR015655 Protein phosphatase 2C "	-3.70203	-3.0571	-3.54574	-3.21064
Solyc02g083460.2.1	0.0133355	36.23	38.07	0.182995	63.76	50.41	0.0578623	59.45	31.77	0.00454	39.05	38.11	"Aspartyl protease family protein (AHRD V1 **-- D7LAA8_ARALY); contains Interpro domain(s) IPR001461 Peptidase A1 "	-2.42169	-1.63187	-2.15059	-2.62447
Solyc02g083480.2.1	1	2.62	1.01	0.584775	5.35	1.1	6.88e-06	19.14	19.39	0.0319196	6.66	8.71	"Peroxidase (AHRD V1 ***- A9PGX3_POPTR); contains Interpro domain(s) IPR002016 Haem peroxidase, plant/fungal/bacterial "	1.1061	1.82976	10.129	3.9853
Solyc02g083490.2.1	0.387944	2.82	1.26	0.141063	7.18	0.61	9.08e-11	55.52	42.71	1.73e-11	34.35	48.16	"Peroxidase (AHRD V1 **** A9PGX3_POPTR); contains Interpro domain(s) IPR002016 Haem peroxidase, plant/fungal/bacterial "	3.00092	5.34529	62.8281	51.5477
Solyc02g083500.2.1	0.286276	4.24	7.78	0.152148	8.25	8.62	0.153995	8.05	7.69	0.0451006	10.59	8.7	"Genomic DNA chromosome 5 TAC clone K2A18 (AHRD V1 ***- Q9FKX3_ARATH); contains Interpro domain(s) IPR006016 UspA "	1.75342	2.38275	2.09555	2.49046
Solyc02g083540.2.1	0.269246	9.12	11.96	0.495822	8.3	9.36	0.0153767	16.02	19.74	0.0197307	15.47	19.53	"Protein kinase domain containing protein (AHRD V1 *--- Q2R001_ORYSJ); contains Interpro domain(s) IPR006461 Protein of unknown function Cys-rich "	1.83989	1.50734	2.84058	2.70473
Solyc02g083570.2.1	0.325951	58.69	61.76	0.213287	57.14	53.46	0.212261	41.49	73.77	0.0482469	45.52	52.38	"Ubiquitin-conjugating enzyme E2 10 (AHRD V1 ***- UBC10_ARATH); contains Interpro domain(s) IPR000608 Ubiquitin-conjugating enzyme, E2 "	-1.42621	-1.60329	-1.63875	-1.97044
Solyc02g083580.2.1	5.54e-05	8.91	27.08	0.000554	30.76	19.42	0.0281206	45.36	42.65	0.0845395	55.16	60.99	"Ras-like GTP-binding protein RHO (AHRD V1 **-- RHO_APLCA); contains Interpro domain(s) IPR003578 Ras small GTPase, Rho type "	-4.9784	-3.65307	-2.20443	-1.71789
Solyc02g083590.2.1	0.0206507	47.66	59.61	0.00534	40.19	48.66	0.0752741	59.67	74.32	0.00755	51.44	59.96	"Dehydroquinate synthase (AHRD V1 ***- Q8RU74_SOLLC); contains Interpro domain(s) IPR016037 3-dehydroquinate synthase AroB, subgroup "	-2.17555	-2.69457	-1.90439	-2.34671
Solyc02g083620.2.1	0.140952	0.99	0.24	0.323942	1.5	0.53	0.0318362	9.39	9.52	0.117853	7.73	6.92	"Ascorbate peroxidase (AHRD V1 **** Q39780_GOSHI); contains Interpro domain(s) IPR002207 Plant ascorbate peroxidase "	-4.07801	-2.72759	2.89275	2.18841
Solyc02g083630.2.1	0.332139	3.61	4.41	1	10.51	6.6	0.00424	22.21	26.04	0.0308995	20.65	15.64	"Ascorbate peroxidase (AHRD V1 **** Q9XGS8_ZANAE); contains Interpro domain(s) IPR002207 Plant ascorbate peroxidase "	-1.8208	1.1176	2.94708	2.15762
Solyc02g083640.2.1	0.133932	0.09	0.93	1	4.8	3.68	0.0104435	14.36	14.88	0.000869	17.16	18.16	"Male sterility 5 family protein (Fragment) (AHRD V1 *-*- B1Q3A0_BRACM); contains Interpro domain(s) IPR011990 Tetratricopeptide-like helical "	-6.00264	1.10413	3.48648	4.08303
Solyc02g083660.1.1	0.0229578	28.87	23.16	0.337861	9.15	26.21	0.232183	14.64	24.46	0.181983	17.9	20.7	"RING finger protein (AHRD V1 *-*- A1C6D2_ASPCL); contains Interpro domain(s) IPR018957 Zinc finger, C3HC4 RING-type "	2.42947	1.61593	1.66059	1.59718
Solyc02g083670.2.1	5.41e-07	34.81	41.94	0.00577	12.29	24.1	0.0526446	5.97	24.39	0.0624236	14.02	9.43	"Histidine kinase (AHRD V1 ***- B5E8B3_GEOBB); contains Interpro domain(s) IPR001789 Signal transduction response regulator, receiver region "	7.96708	3.70271	2.8823	2.18988
Solyc02g083680.1.1	1.82e-05	18.89	20.38	0.0790856	6.77	8.95	0.245988	2.76	11.2	0.608075	4.69	4.65	"Multi-sensor hybrid histidine kinase (AHRD V1 *-** A8ZX44_DESOH); contains Interpro domain(s) IPR004358 Signal transduction histidine kinase-related protein, C-terminal "	7.08843	2.78325	2.3243	1.53944
Solyc02g083700.2.1	6.31e-15	78.97	85.17	1.48e-07	19.23	37.25	1	1.64	0.99	0.289662	2.61	3.4	"Alpha-mannosidase (AHRD V1 **** Q9FKW9_ARATH); contains Interpro domain(s) IPR011682 Glycosyl hydrolases 38, C-terminal "	87.3781	29.4736	1.42179	2.99624
Solyc02g083730.2.1	0.00198	50.6	52.08	0.153599	18.21	43.69	0.00756	1.95	9.29	2.37e-05	4.21	2.06	"Thiosulfate sulfurtransferase rhodanese domain protein (AHRD V1 **** A5ID08_LEGPC); contains Interpro domain(s) IPR001763 Rhodanese-like "	3.15648	1.86098	-3.11135	-5.59374
Solyc02g083750.1.1	0.248801	29.4	27.14	0.235904	31.16	25.93	0.0860489	23.97	25.02	0.0438721	24.71	23.31	"Transcription regulator (AHRD V1 *--* D7L304_ARALY); contains Interpro domain(s) IPR007592 Protein of unknown function DUF573 "	-1.50036	-1.53849	-1.89766	-1.99088
Solyc02g083760.2.1	0.00451	7.68	10.45	0.030281	14.19	10.37	0.0259508	15.3	10.06	0.0585265	13.3	18.9	"Thaumatin-like protein (AHRD V1 ***- Q9STX6_ARATH); contains Interpro domain(s) IPR001938 Thaumatin, pathogenesis-related "	-3.37387	-2.57759	-2.63634	-2.13694
Solyc02g083790.2.1	4.13e-05	1.97	2.51	0.00552	5.23	4.76	1.34e-05	2.55	1.94	0.00344	5.65	6.79	"Thaumatin-like protein (AHRD V1 ***- Q9ZQY9_ARATH); contains Interpro domain(s) IPR001938 Thaumatin, pathogenesis-related "	-6.99479	-3.33139	-7.59681	-2.92956
Solyc02g083810.2.1	0.174484	6.32	6.34	0.633951	6.46	2	0.0695264	6.29	10.35	0.0237788	9.15	10.29	"Ferredoxin--NADP reductase (AHRD V1 ***- D7MN04_ARALY); contains Interpro domain(s) IPR012146 Ferredoxin--NADP reductase "	2.32516	1.51527	2.78558	3.16412
Solyc02g083820.1.1	0.582956	48.4	42.12	1	43.6	33.03	0.12959	27.81	12.67	0.0264976	15.93	19.68	"Armadillo/beta-catenin repeat family protein (AHRD V1 **-- D7MDH4_ARALY); contains Interpro domain(s) IPR011989 Armadillo-like helical "	1.24397	1.01497	-1.9584	-2.2921
Solyc02g083850.2.1	1.25e-10	7.25	5.41	3.24e-05	27.2	15.15	2.81e-06	20.47	12.42	5.58e-07	17.16	20.94	"Calcium-dependent protein kinase (AHRD V1 **** C6KGT3_SOLLC); contains Interpro domain(s) IPR002290 Serine/threonine protein kinase "	-17.4817	-5.50946	-7.4548	-6.6298
Solyc02g083870.2.1	1	0	25.88	0.014155	49	47.11	0.424075	9.71	6.62	0.0935758	54.31	18.44	"Gibberellin-regulated protein 2 (AHRD V1 **-- B6SKV6_MAIZE); contains Interpro domain(s) IPR003854 Gibberellin regulated protein "	1.00057	3.68723	-1.6656	2.53888
Solyc02g083880.2.1	0.00133	3.73	44.44	0.193066	123.32	37.91	0.0422598	230.72	415.85	0.00659	331.21	387.59	"Gibberellin-regulated protein 2 (AHRD V1 *--- B6SKV6_MAIZE); contains Interpro domain(s) IPR003854 Gibberellin regulated protein "	-5.70709	-1.73248	2.19483	2.38965
Solyc02g083890.2.1	0.154283	0.66	5.29	0.804429	18.87	4.71	0.000767	54.85	51.63	9e-05	62.39	56.34	Unknown Protein (AHRD V1)	-3.02756	1.23561	5.25348	5.67488
Solyc02g083920.1.1	1	0	1.15	1	0.57	0	0.031444	2.11	4.06	0.250229	1.74	1.46	Unknown Protein (AHRD V1)	3.15378	1.83001	13.5411	7.16411
Solyc02g083940.2.1	0.0366299	3.63	3.69	0.129903	6.7	2.58	0.146263	6.86	5.26	0.026856	3.76	5.53	"WD repeat protein-like (AHRD V1 **-- Q8RXD8_ARATH); contains Interpro domain(s) IPR020472 G-protein beta WD-40 repeat, region "	-2.72503	-2.23842	-1.82255	-2.42841
Solyc02g083980.2.1	0.000148	17.53	25.98	0.268269	4.73	12.17	0.111043	1.11	0.9	0.109911	0.46	1.46	"Endoglucanase 1 (AHRD V1 ***- B6U0J0_MAIZE); contains Interpro domain(s) IPR001701 Glycoside hydrolase, family 9 "	5.28406	2.02489	-3.95605	-4.21434
Solyc02g084190.1.1	0.039395	0.43	0	0.0440337	0.4	0	0.292521	1.1	0.77	0.1254	0.36	0.76	Unknown Protein (AHRD V1)	-9.70468	-10.5048	-3.45442	-5.44001
Solyc02g084240.2.1	0.000847	174.47	159.47	0.0573232	63.2	182.62	0.656737	48.73	91.54	0.83363	81.84	48.5	"H1 histone-like protein (AHRD V1 ***- Q43511_SOLLC); contains Interpro domain(s) IPR005818 Histone H1/H5 "	3.13725	2.25939	1.19624	1.08078
Solyc02g084280.2.1	0.00312	11.29	4.66	0.219459	19.48	15.24	0.0806284	17.1	13.04	0.0380187	12.71	16.91	Unknown Protein (AHRD V1)	-3.28984	-1.58592	-1.92928	-2.01765
Solyc02g084290.1.1	0.104616	2.69	0.99	0.0280398	2.46	0	0.057455	1.17	2.84	0.0219756	0	3.2	Unknown Protein (AHRD V1)	-3.27495	-4.90788	-3.28613	-4.16028
Solyc02g084300.1.1	0.120949	2.09	1.53	0.0230616	0.96	0	0.475363	2.49	4.43	0.631122	3.13	4.26	CTP synthase (AHRD V1 ***- D7MFK7_ARALY)	-2.64288	-8.72023	-1.55851	-1.5005
Solyc02g084330.2.1	0.0409992	6.45	3.88	0.108798	8.11	4.83	0.0391768	5.09	7.38	0.104456	5.88	10.06	Unknown Protein (AHRD V1)	-2.51344	-2.08738	-2.29634	-1.85406
Solyc02g084340.1.1	0.739364	29.39	28.79	0.761086	24.1	35.84	0.153999	17.95	24.81	0.0428711	18.12	19.06	"Pre-mRNA-splicing factor CWC25-like protein (AHRD V1 *-*- D0MR21_PHYIN); contains Interpro domain(s) IPR019339 CBF1-interacting co-repressor CIR, N-terminal "	-1.15423	-1.15258	-1.72074	-2.02804
Solyc02g084370.1.1	0.64878	0.41	0.8	0.606282	4.46	2.72	0.0312139	9.79	6.41	0.00195	10.05	11.39	Receptor like kinase, RLK	-2.6728	1.83295	3.82071	4.88704
Solyc02g084390.2.1	0.0188403	9.67	18.03	0.331636	9.7	7.72	0.359127	8.4	8.84	0.256525	8.34	10.6	"Kinesin like protein (AHRD V1 *-*- Q0WLK7_ARATH); contains Interpro domain(s) IPR001752 Kinesin, motor region "	2.82301	1.73976	1.62767	1.73821
Solyc02g084410.2.1	3.41e-10	3.53	1.37	0.00524	23.1	17.37	0.000885	19.32	12.94	7.38e-06	6.51	15.18	"Glyoxalase (AHRD V1 ***- B4ERW1_WHEAT); contains Interpro domain(s) IPR004360 Glyoxalase/bleomycin resistance protein/dioxygenase "	-21.7062	-2.85286	-3.77263	-5.73179
Solyc02g084430.2.1	0.00352	6.29	3.46	0.520269	2.16	0	0.0627585	2.45	2.36	0.125229	2.88	1.74	COL domain class transcription factor (AHRD V1 ***- D9ZIX1_MALDO)	38.9772	9.21458	18.8966	17.9604
Solyc02g084510.2.1	0.0183152	3.56	5.03	0.112848	8.75	4.45	0.19469	8.59	8.05	0.133669	7.54	8.77	"Novel protein containing a PHD-finger domain (Fragment) (AHRD V1 *--- Q07G27_XENTR); contains Interpro domain(s) IPR018144 Plus-3 domain, subgroup "	-2.98241	-2.02904	-1.70462	-1.78455
Solyc02g084570.2.1	0.00793	84.39	62.87	0.000105	44.81	42.7	5.84e-06	19.38	37.58	8.96e-07	26.41	36.64	Cytochrome P450	-2.92078	-5.10173	-8.33925	-7.68722
Solyc02g084590.2.1	0.765174	3.75	2.83	0.581101	3.19	4.28	0.00706	6.66	13.72	0.00761	8.6	9.39	"GATA transcription factor 9 (AHRD V1 *-*- B6STZ1_MAIZE); contains Interpro domain(s) IPR016679 Transcription factor, GATA, plant "	1.58884	1.74468	4.38482	3.77695
Solyc02g084610.1.1	0.000385	7.05	16.42	0.0161556	7.89	5.26	0.000183	12.75	9.24	0.00241	7.35	8.98	LRR receptor-like serine/threonine-protein kinase, RLP	11.7559	6.49875	10.2374	7.43916
Solyc02g084630.2.1	0.365977	15.67	17.68	0.043352	29.68	24.68	0.224289	24.22	17.74	0.460212	20.51	14.63	"MADS-box transcription factor (AHRD V1 ***- Q4LEZ4_ASPOF); contains Interpro domain(s) IPR002100 Transcription factor, MADS-box "	1.44241	2.26843	1.66039	1.35213
Solyc02g084640.2.1	0.0483674	7.67	6.87	0.0105657	10.85	8.91	0.0163156	9.1	8.3	0.0220028	6.06	9.97	"Aldehyde dehydrogenase (AHRD V1 **** Q71LY7_ORYSI); contains Interpro domain(s) IPR012394 Aldehyde dehydrogenase NAD(P)-dependent IPR015590 Aldehyde dehydrogenase "	3.51578	4.6011	3.84788	3.45805
Solyc02g084650.2.1	0.0723906	22.24	11.45	0.0896752	18.8	18.26	0.284032	27.52	21.64	0.00771	14.97	15.17	"Unknown Protein (AHRD V1); contains Interpro domain(s) IPR019180 Oxidoreductase-like protein, N-terminal "	-2.01186	-1.906	-1.52442	-2.54969
Solyc02g084720.2.1	0.0440285	11.01	20.73	0.390708	35.44	13.27	0.042451	77.37	81.76	0.0312387	77.37	80.05	"Beta-galactosidase (AHRD V1 ***- Q9LLS9_SOLLC); contains Interpro domain(s) IPR019801 Glycoside hydrolase, family 35, conserved site IPR001944 Glycoside hydrolase, family 35 IPR000922 D-galactoside/L-rhamnose binding SUEL lectin "	-2.14803	-1.4503	2.13358	2.05567
Solyc02g084780.2.1	3.64e-05	48.74	52.89	2.22e-06	86.48	63.91	1.29e-13	391.22	291.32	6.29e-18	341.17	480.2	"Peroxidase (AHRD V1 ***- Q0ZA68_9ROSI); contains Interpro domain(s) IPR002016 Haem peroxidase, plant/fungal/bacterial "	4.80716	6.87435	29.5552	34.6291
Solyc02g084790.2.1	0.000139	28.81	41.73	1.34e-05	81.83	36.69	5.7e-16	421.22	376.34	2.42e-19	352.14	509.49	"Peroxidase (AHRD V1 ***- Q0ZA68_9ROSI); contains Interpro domain(s) IPR002016 Haem peroxidase, plant/fungal/bacterial "	4.62302	7.48386	47.8476	50.4762
Solyc02g084800.2.1	1	6.7	2.89	0.382505	7.49	8.18	0.0790976	13.5	9.73	0.00375	19.56	14.25	"Peroxidase (AHRD V1 ***- Q0ZA68_9ROSI); contains Interpro domain(s) IPR002016 Haem peroxidase, plant/fungal/bacterial "	1.02452	1.60324	2.23098	3.1416
Solyc02g084820.2.1	0.323971	8.53	12.93	0.114977	14.9	13.44	0.0285812	18.47	15.65	0.00794	20.68	18.93	"Glycosyl transferase group 1 (AHRD V1 *-** B5WGB2_9BURK); contains Interpro domain(s) IPR001296 Glycosyl transferase, group 1 "	1.60803	2.06123	2.33689	2.62969
Solyc02g084850.2.1	0.0500742	12.26	19.37	3.99e-08	797.49	468.54	0.853908	55.05	40.04	0.146974	181.47	24.88	"Unknown Protein (AHRD V1); contains Interpro domain(s) IPR000167 Dehydrin "	-2.47524	15.543	1.1132	2.29727
Solyc02g084860.1.1	0.003	36.84	78.99	0.00154	44.05	96.61	0.411515	12.87	15.83	0.602141	22.81	26.31	"BZIP transcription factor (AHRD V1 **-* C0KYN1_SOLLC); contains Interpro domain(s) IPR011616 bZIP transcription factor, bZIP-1 "	3.20444	3.85373	-1.35389	1.22697
Solyc02g084870.2.1	0.0497116	13.83	17.67	0.262869	13.07	13.13	0.118156	14.61	15.95	0.0802304	13.73	17.84	"Mitogen-activated protein kinase 7 (AHRD V1 ***- D9IV43_SOLLC); contains Interpro domain(s) IPR002290 Serine/threonine protein kinase "	2.11892	1.71461	1.88416	1.8954
Solyc02g084890.1.1	3.85e-06	90.58	74.38	0.000793	47.12	60.7	0.377464	31.2	8.97	0.818515	11.42	11.3	Cc-nbs-lrr, resistance protein	6.9749	4.41159	1.56122	-1.15936
Solyc02g084900.2.1	0.632816	14.35	9.5	0.269687	20.28	11.32	0.0166392	32.07	21.17	0.0837948	16.52	22.04	"Cell division protease ftsH homolog (AHRD V1 *--- FTSH_BACPE); contains Interpro domain(s) IPR003959 ATPase, AAA-type, core "	1.28982	1.63767	2.61149	1.84572
Solyc02g084930.2.1	3.75e-09	344.88	373.05	0.000182	129.87	258.78	5.75e-07	4.65	4.5	1.96e-05	10.49	6.38	Cytochrome P450	8.89454	4.70653	-9.37497	-5.3093
Solyc02g084940.1.1	2.4e-07	56.32	39.44	0.00116	9.6	61.37	0.00423	0.18	0.45	0.0389187	2.13	0.3	Unknown Protein (AHRD V1)	9.94161	7.23949	-11.9185	-4.06735
Solyc02g084950.2.1	1.61e-05	51.77	34.7	0.0236821	13.47	23.76	1	6.68	5.13	1	3.55	7.98	"Carboxyl methyltransferase 4 (AHRD V1 **** B0ZB58_HUMLU); contains Interpro domain(s) IPR005299 SAM dependent carboxyl methyltransferase "	7.65743	3.19616	-1.03086	-1.08291
Solyc02g084960.1.1	0.406326	10.85	6.83	0.318211	13.22	1.75	0.0186818	5.83	4.45	0.0224609	6.3	4.75	Genomic DNA chromosome 5 TAC clone K1F13 (AHRD V1 ***- Q9FJZ5_ARATH)	-1.4367	-1.77468	-2.67893	-2.56585
Solyc02g084980.2.1	1.36e-06	141.43	83.76	6.29e-08	127.07	168.97	0.252768	13.75	0.76	0.0266161	3.77	7.5	"Galactinol synthase (AHRD V1 ***- C7G304_SOLLC); contains Interpro domain(s) IPR002495 Glycosyl transferase, family 8 "	8.28242	10.4683	-2.02433	-2.66885
Solyc02g084990.2.1	1	3.66	3.84	0.0554858	7.83	11.03	4.51e-07	26.14	47.65	3.77e-07	33.37	22.52	"Mannan endo-1 4-beta-mannosidase (AHRD V1 ***- A8FDC6_BACP2); contains Interpro domain(s) IPR001547 Glycoside hydrolase, family 5 "	1.29237	3.09313	11.2422	8.31343
Solyc02g085000.2.1	0.00128	20.98	16.29	0.0853985	28.58	39.44	0.00255	24.75	16.26	0.000132	20.62	15.27	Genomic DNA chromosome 5 TAC clone K1F13 (AHRD V1 ***- Q9FJZ1_ARATH)	-3.40396	-1.93219	-3.39382	-3.99972
Solyc02g085010.1.1	0.572719	153.35	224	0.568985	113.53	120.21	0.0240801	63.3	46.35	0.00872	66.39	33.88	Unknown Protein (AHRD V1)	1.28151	-1.28927	-2.90724	-3.29816
Solyc02g085030.2.1	0.00925	8.6	15.63	0.0703647	10.11	7.76	0.00149	12.3	19.93	0.00213	12.66	14.95	"UBA/TS-N domain protein (AHRD V1 *--- B8NTJ3_ASPFN); contains Interpro domain(s) IPR001623 Heat shock protein DnaJ, N-terminal "	3.80036	2.73979	4.63031	3.86976
Solyc02g085050.2.1	0.0352798	63.54	60.05	0.735905	136.45	104.04	0.122691	90.12	67.61	0.0483312	80.26	72.08	"Inorganic pyrophosphatase-like protein (AHRD V1 **** Q8LA73_ARATH); contains Interpro domain(s) IPR008162 Inorganic pyrophosphatase "	-2.13017	-1.13639	-1.82746	-1.95144
Solyc02g085060.1.1	3.36e-14	46.28	63.65	4.77e-07	12.81	19.74	1	0.00717	0	1	0.68	0.54	Replication factor C subunit 5 (AHRD V1 *-*- B6T5I0_MAIZE)	426.281	126.011	1.0267	5.45983
Solyc02g085070.1.1	1.01e-06	13.77	11.73	0.0503393	1.24	4.81	1	0	0	1	0.25	0.13	"Hydrolase alpha/beta fold family protein (AHRD V1 ***- D7MBG9_ARALY); contains Interpro domain(s) IPR000639 Epoxide hydrolase-like "	79.3156	19.1271	-1.27701	1.87617
Solyc02g085080.2.1	0.073425	7.85	11.12	0.263141	5.64	8.65	0.0804705	9.55	8.55	0.027195	12.49	10.2	"Transmembrane protein 53 (AHRD V1 *-*- B5X6E4_SALSA); contains Interpro domain(s) IPR008547 Protein of unknown function DUF829, transmembrane 53 "	2.61988	1.93205	2.29419	2.78824
Solyc02g085100.2.1	0.0413339	13.3	17.1	0.269757	11.87	10.07	0.0503176	14.73	16.35	0.0786677	14.96	13.36	"Aldose 1-epimerase family protein (AHRD V1 **** D7MMG0_ARALY); contains Interpro domain(s) IPR014718 Glycoside hydrolase-type carbohydrate-binding, subgroup "	2.3783	1.67368	2.22563	1.97177
Solyc02g085120.2.1	0.40796	0.88	6	0.583634	6.14	0.67	7.38e-05	13.64	17.17	0.0120672	8.8	8.48	"Laccase (AHRD V1 ***- Q9AUI0_PINTA); contains Interpro domain(s) IPR017761 Laccase "	1.96074	1.88991	7.8745	4.32623
Solyc02g085130.2.1	0.201693	5.67	7.4	0.52826	8	2.69	0.0438785	11.54	8.31	0.0957595	7.89	9.29	"Tubby-like F-box protein 5 (AHRD V1 ***- TLP5_ORYSJ); contains Interpro domain(s) IPR000007 Tubby, C-terminal "	1.9986	1.58832	2.76526	2.33057
Solyc02g085260.1.1	0.500448	1.03	1.42	1	0.24	0	0.000851	21.81	1.14	0.0157252	4.52	3.46	Unknown Protein (AHRD V1)	10.5387	1.90436	87.5682	30.3119
Solyc02g085300.2.1	3.52e-05	17.37	14.5	0.000732	16.52	24.99	1.93e-07	6.87	10.58	5.68e-10	7.09	7.8	"CRAL/TRIO domain containing protein expressed (AHRD V1 **-- Q75GU9_ORYSJ); contains Interpro domain(s) IPR001251 Cellular retinaldehyde-binding/triple function, C-terminal "	-4.64678	-3.68512	-9.26719	-11.1059
Solyc02g085310.2.1	0.000436	21.36	14.05	0.0480068	48.71	20.4	0.0130902	30.41	31.03	0.00506	32.87	28.95	Unknown Protein (AHRD V1)	-4.3375	-2.33645	-2.76366	-2.8253
Solyc02g085320.1.1	0.527925	3.1	14.22	0.020218	4.25	0	0.145324	4.03	8.21	0.180278	9.47	3.76	Unknown Protein (AHRD V1)	-1.43803	-5.73511	-2.17334	-2.07263
Solyc02g085400.2.1	0.00189	0.46	1.09	0.118837	4.58	0.73	0.015455	2.25	0.76	0.0129483	0.46	2.7	"Os01g0786800 protein (Fragment) (AHRD V1 ***- Q0JIP0_ORYSJ); contains Interpro domain(s) IPR002781 Protein of unknown function DUF81 "	-8.13445	-2.71354	-4.87949	-4.79986
Solyc02g085500.2.1	0.502777	1.52	0	0.258893	1.71	1.11	0.00116	9.11	3.23	0.0313931	3.57	2.78	Ovate protein (AHRD V1 ***- Q8GSM4_SOLLC)	6.91721	11.7639	47.0596	24.3267
Solyc02g085600.1.1	0.00828	26.83	16.46	0.071654	32.56	30.16	0.00143	22.78	12.2	7.72e-05	15.51	16.08	"GRAS family transcription factor (AHRD V1 **-* B9HET8_POPTR); contains Interpro domain(s) IPR005202 GRAS transcription factor "	-2.72909	-1.96392	-3.70774	-4.23059
Solyc02g085720.1.1	0.327138	5.49	5.78	0.452947	5.96	7.02	0.01551	3.33	2.33	0.0237788	2.93	4.32	"Geranylgeranyl pyrophosphate synthase (AHRD V1 ***- Q9SSU0_9ROSI); contains Interpro domain(s) IPR000092 Polyprenyl synthetase "	-1.60304	-1.43683	-3.41432	-2.76593
Solyc02g085730.2.1	4.46e-11	37.4	43.53	1.01e-05	115.67	47.16	1.18e-05	102.1	94.63	8.38e-07	93.77	110.96	"Allene oxide cyclase (AHRD V1 **** Q9LEG5_SOLLC); contains Interpro domain(s) IPR009410 Allene oxide cyclase "	-12.4483	-6.44287	-5.60203	-5.52841
Solyc02g085830.2.1	0.000153	46.82	50.3	6.66e-05	52.58	62.5	0.249866	15.36	23.03	1	14.04	10.25	"IST1 homolog (AHRD V1 **-- C1BSR8_9MAXI); contains Interpro domain(s) IPR005061 Protein of unknown function DUF292, eukaryotic "	4.31812	4.96852	1.56574	-1.03169
Solyc02g085870.2.1	0.694594	2.45	1.35	0.34029	4.97	1.24	0.180501	4.05	3.67	0.0389187	5.73	5.28	"Fatty acid elongase 3-ketoacyl-CoA synthase (AHRD V1 **** Q6DUV5_BRANA); contains Interpro domain(s) IPR012392 Very-long-chain 3-ketoacyl-CoA synthase "	1.68849	2.60358	3.04812	4.19294
Solyc02g085880.1.1	1	0.66	0.1	0.0394455	3.93	2.2	1	0.34	0.49	1	0.09	0.19	Cytochrome P450	1.66494	10.1763	1.66794	-1.20772
Solyc02g085910.2.1	2.15e-09	0.22	1.38	0.000271	13.99	5.99	0.746563	27.4	117.61	0.224238	45.46	53.67	"LOB domain protein 42 (AHRD V1 ***- D7KWD0_ARALY); contains Interpro domain(s) IPR004883 Lateral organ boundaries, LOB "	-86.1822	-8.17405	-1.21209	-1.8003
Solyc02g086130.2.1	0.604425	3.86	4.26	0.106214	8.32	5.84	0.0151711	10.37	10.65	0.00673	10.99	11.91	Unknown Protein (AHRD V1)	1.48605	2.48187	3.45819	3.66066
Solyc02g086140.1.1	1	1.56	2.63	0.309883	4.16	4.78	0.00422	9.19	10.97	0.00178	12.85	9.04	Genomic DNA chromosome 5 P1 clone MSI17 (AHRD V1 ***- Q9FKN3_ARATH)	1.07056	2.15342	4.51117	4.76029
Solyc02g086160.2.1	0.00201	35.96	33.45	0.0487526	21.25	27.5	0.908156	15.77	9.99	0.550375	13.5	16.78	"D-xylose transporter (AHRD V1 **** D0DTW3_LACFE); contains Interpro domain(s) IPR003663 Sugar/inositol transporter "	3.24163	2.21151	1.10526	1.25912
Solyc02g086180.2.1	0.0212745	9.31	19.39	0.80357	81.1	67.47	0.935607	100.07	77.01	0.739513	101.61	143.91	"Sterol C-5 desaturase (AHRD V1 **** D7FW86_ECTSI); contains Interpro domain(s) IPR006694 Fatty acid hydroxylase "	-6.07354	-1.20634	-1.06939	1.26254
Solyc02g086210.2.1	0.0962642	24.74	8.33	0.00131	25.96	32.9	0.376136	19.03	5.14	0.245771	11.9	12.87	"Receptor-like protein kinase (AHRD V1 ***- D3G6F0_CAPAN); contains Interpro domain(s) IPR002290 Serine/threonine protein kinase "	2.40981	4.09732	1.60079	1.59777
Solyc02g086260.1.1	0.0116843	6.58	6.52	0.482293	3.42	1.42	0.0235962	9.63	3.45	0.0389187	5.93	4.86	Unknown Protein (AHRD V1)	6.05086	2.23602	5.56335	4.48407
Solyc02g086280.2.1	0.00194	8.35	9.25	0.120364	7.13	2.2	0.0908684	7.68	2.35	0.0158877	3.9	8.85	Receptor protein kinase-like protein (AHRD V1 ***- Q9FF32_ARATH)	7.64674	3.95002	4.0558	5.00106
Solyc02g086430.2.1	0.136894	3.21	2.43	1	2.42	0	0.01213	4.59	6	0.219179	2.05	2.97	"Zinc finger protein 36 C3H type-like 1 (Fragment) (AHRD V1 *-*- C5H180_ACRGR); contains Interpro domain(s) IPR000571 Zinc finger, CCCH-type "	3.8053	1.67096	6.45776	3.06212
Solyc02g086440.2.1	0.0342607	26.43	25.87	0.177249	16.43	26.1	1	14.63	12.05	0.898975	11.62	12.69	"Unknown Protein (AHRD V1); contains Interpro domain(s) IPR001810 Cyclin-like F-box "	2.21229	1.74944	1.0376	-1.08495
Solyc02g086460.2.1	0.711825	106.18	91.67	0.00463	35.27	37.45	0.150362	24.9	99.33	3.21e-05	21.74	25.1	Unknown Protein (AHRD V1)	-1.16055	-3.26146	-2.05103	-5.50697
Solyc02g086470.2.1	0.643703	0	0.69	1	2.06	0.37	0.278345	5.51	4.46	0.0319196	8.27	6.39	"WD repeat protein (AHRD V1 **-- B8MBM8_TALSN); contains Interpro domain(s) IPR020472 G-protein beta WD-40 repeat, region "	-3.98434	-1.43874	2.48626	3.52342
Solyc02g086530.2.1	0.500195	1.22	0.65	0.000573	18.4	2.81	0.500207	1.96	0.08	1	0.51	0.11	"Alpha-galactosidase (AHRD V1 **-- C0NUM4_AJECG); contains Interpro domain(s) IPR008811 Raffinose synthase "	5.27002	51.6111	5.41859	2.04695
Solyc02g086550.2.1	0.355842	10.04	9.91	0.27567	13.04	8.64	0.0257147	17.1	17.53	0.0455294	15.82	14.55	"Os06g0661900 protein (Fragment) (AHRD V1 ***- Q0DAD0_ORYSJ); contains Interpro domain(s) IPR004949 Protein of unknown function DUF266, plant "	1.57912	1.66067	2.4926	2.12517
Solyc02g086590.2.1	0.0153793	15.77	13.46	0.0153427	16.02	12.63	0.778825	33.66	36.31	0.189222	29.4	22.26	RLK, Receptor like protein, putative resistance protein with an antifungal domain	-2.43239	-2.5708	-1.12106	-1.56144
Solyc02g086730.1.1	0.0144537	11.04	10.26	0.104498	6.16	10.31	0.00817	14.48	10.63	0.00229	12.54	15.68	"50S ribosomal protein L12-C (AHRD V1 ***- Q8LBJ7_ARATH); contains Interpro domain(s) IPR015608 Ribosomal protein L12, chloroplast "	3.33444	2.51436	3.59305	3.92563
Solyc02g086760.1.1	0.628991	1.6	1.58	0.637645	0.9	1.96	0.0232634	6.17	3.25	0.219179	1.94	3.21	Unknown Protein (AHRD V1)	3.71448	3.29243	9.71686	5.3155
Solyc02g086810.1.1	0.911793	10.3	13.02	0.673408	14.17	7.19	0.150623	6.03	9.26	0.0224504	6.91	4.74	"Unknown Protein (AHRD V1); contains Interpro domain(s) IPR012442 Protein of unknown function DUF1645 "	-1.08985	-1.23004	-1.80393	-2.41607
Solyc02g086830.2.1	0.00184	18.82	25.84	0.130153	10.37	18.12	0.12138	13.55	13.24	0.205238	11.98	12.36	"Protease Do-like (S2 serine-type protease) (AHRD V1 **** Q7UQ70_RHOBA); contains Interpro domain(s) IPR001254 Peptidase S1 and S6, chymotrypsin/Hap "	3.43633	2.15045	1.89694	1.67608
Solyc02g086860.2.1	0.00996	9.03	11.07	0.0525073	8.81	7.52	0.219239	6.36	5.37	0.302874	5.77	5.36	"UPF0497 membrane protein At2g36330 (AHRD V1 *-*- U497A_ARATH); contains Interpro domain(s) IPR006702 Uncharacterised protein family UPF0497, trans-membrane plant "	4.05891	3.21159	2.19581	2.02847
Solyc02g086880.2.1	7.47e-07	125.07	123.47	0.00209	300.22	104.07	0.244993	267.27	699.53	0.0121628	365.62	352.42	"Formate dehydrogenase (AHRD V1 **** Q5NE18_SOLLC); contains Interpro domain(s) IPR006140 D-isomer specific 2-hydroxyacid dehydrogenase, NAD-binding "	-5.74522	-3.69287	-1.63295	-2.2434
Solyc02g086930.2.1	0.00626	166.39	151.15	0.0334091	121.13	144.81	0.481259	98.89	63.37	0.750027	69.69	70.89	"Homeobox-leucine zipper-like protein (AHRD V1 *-*- Q3HRT1_PICGL); contains Interpro domain(s) IPR001356 Homeobox IPR017970 Homeobox, conserved site "	2.88563	2.34052	1.34853	1.13361
Solyc02g086950.1.1	0.016465	10.4	11.13	1	3.17	4.16	0.129259	0.52	0.76	0.508412	2.17	1.26	"Ring H2 finger protein (AHRD V1 *-*- D9ZHD8_HYPPE); contains Interpro domain(s) IPR018957 Zinc finger, C3HC4 RING-type "	3.55117	1.19851	-4.31209	-1.85627
Solyc02g087000.2.1	0.000734	38.51	31.88	0.0809245	17.35	23.63	1	9.42	11.95	1	10.04	10.83	"Potassium transporter (AHRD V1 **** D2JYH2_GOSHI); contains Interpro domain(s) IPR018519 Potassium uptake protein, kup IPR003855 K+ potassium transporter "	3.594	2.03112	1.00216	-1.04978
Solyc02g087010.2.1	0.0338037	17.91	16.2	0.0311496	13.49	24.82	0.265734	11.71	14.13	0.353041	12.37	11.28	"NHL repeat-containing protein (AHRD V1 ***- D7KY00_ARALY); contains Interpro domain(s) IPR001258 NHL repeat "	2.38135	2.59821	1.65185	1.47302
Solyc02g087040.1.1	0.0206011	10.58	16.57	0.0446233	11.34	13.44	0.340871	9.63	6.86	0.152135	8.05	12.18	"RING finger protein (AHRD V1 ***- C6EUD3_SOYBN); contains Interpro domain(s) IPR018957 Zinc finger, C3HC4 RING-type "	2.91367	2.59195	1.63611	1.94794
Solyc02g087050.2.1	0.0195438	9.34	12.84	0.059893	10.67	11.57	0.0267472	11.84	11.66	0.00433	13.77	14.29	"Nodulin MtN21 family protein (AHRD V1 ***- D7MJA5_ARALY); contains Interpro domain(s) IPR000620 Protein of unknown function DUF6, transmembrane "	2.83902	2.76736	2.75624	3.19751
Solyc02g087060.2.1	1e-09	71.01	79	0.000204	21.74	39.77	0.235723	9.45	9.76	0.135552	10.92	11.85	Nodulin MtN21 family protein (AHRD V1 ***- D7LPP0_ARALY)	14.4381	5.79004	1.71988	1.98239
Solyc02g087070.2.1	0.000283	21.14	39.35	3.01e-05	30.52	16.51	0.687718	96.22	193.69	0.0589952	86.05	49.6	"Peroxidase family protein (AHRD V1 **-- Q1D1V4_MYXXD); contains Interpro domain(s) IPR002007 Haem peroxidase, animal "	-3.72711	-4.92014	1.17497	-1.86756
Solyc02g087090.2.1	0.789195	14.31	23.11	0.0421344	3.31	12.43	0.00045	4.53	4.22	0.000171	4.05	4.66	"Prostaglandin G/H synthase 2 (AHRD V1 **-- PGH2_CHICK); contains Interpro domain(s) IPR002007 Haem peroxidase, animal "	-1.13064	-2.7144	-5.13253	-5.29475
Solyc02g087190.1.1	0.226954	10.82	22.14	0.010696	32.2	26.61	0.000562	51.11	40.4	0.000185	39.6	57.35	"Peroxidase 65 (AHRD V1 **** B6TYF5_MAIZE); contains Interpro domain(s) IPR002016 Haem peroxidase, plant/fungal/bacterial "	1.64055	2.84732	4.18802	4.31929
Solyc02g087200.1.1	0.213989	6.14	10.01	0.30431	10.08	5.9	0.0279051	13.34	11.78	0.0164596	11.41	16.03	"U-box domain-containing protein 40 (AHRD V1 **-- PUB40_ARATH); contains Interpro domain(s) IPR011989 Armadillo-like helical "	1.85851	1.78864	2.63751	2.80016
Solyc02g087210.2.1	0.0047	129.81	95.43	0.164821	234.81	196.36	0.00971	159.66	33.35	4.29e-05	84.1	72.79	"Zinc finger AN1 domain-containing stress-associated protein 12 (AHRD V1 ***- SAP12_ARATH); contains Interpro domain(s) IPR000058 Zinc finger, AN1-type "	-3.25717	-1.77304	-4.14486	-5.30686
Solyc02g087280.2.1	1.88e-05	19.28	20.02	0.156218	3.33	11.03	0.727014	1.71	1.51	0.453625	1.04	1.47	"Peptide transporter (AHRD V1 **-* A6YJX5_9MAGN); contains Interpro domain(s) IPR000109 TGF-beta receptor, type I/II extracellular region "	8.2038	2.9515	-1.50612	-1.93656
Solyc02g087330.2.1	0.000484	33.37	83.1	0.0311774	116.84	97.8	0.051394	121.43	115.3	0.043778	141.5	121.49	"B12D-like protein (AHRD V1 ***- D2XQY6_WOLAR); contains Interpro domain(s) IPR010530 B12D "	-3.80492	-2.10335	-2.01875	-1.8725
Solyc02g087350.1.1	0.0638371	286.98	252	0.633847	113.29	174.75	0.518315	131.8	32.92	0.0307542	52.16	35.28	"Glycosyltransferase (AHRD V1 ***- B9N4D7_POPTR); contains Interpro domain(s) IPR002495 Glycosyl transferase, family 8 "	2.45162	1.27202	-1.45069	-2.84453
Solyc02g087400.1.1	0.628205	1.34	1.5	1	1.29	0	0.071352	2.95	4.98	0.0393201	5.87	2.96	"Ankyrin repeat domain containing protein (AHRD V1 *--- B2WQ30_PYRTR); contains Interpro domain(s) IPR002110 Ankyrin "	2.39646	1.16843	5.8577	6.34767
Solyc02g087440.2.1	1	0.23	0.42	0.402312	2.91	0.91	0.125542	3.55	3.01	0.0118502	5.88	5.13	Unknown Protein (AHRD V1)	1.00125	4.41123	7.01974	11.3157
Solyc02g087480.2.1	0.540424	57.66	46.93	0.931277	68.29	63.14	0.0280235	39.18	18.17	0.014869	26.92	35.97	"cDNA clone J075153F01 full insert sequence (AHRD V1 **-- B7F9A7_ORYSJ); contains Interpro domain(s) IPR009769 Protein of unknown function DUF1336 "	-1.25762	-1.03877	-2.50485	-2.35425
Solyc02g087500.1.1	2.57e-21	145.79	169.56	3.53e-10	23.03	57.62	1	0	0.09	0.125229	2.91	1.91	"ER glycerol-phosphate acyltransferase (AHRD V1 **** B9S2F2_RICCO); contains Interpro domain(s) IPR002123 Phospholipid/glycerol acyltransferase "	1224.47	312.653	1.35348	18.7222
Solyc02g087580.2.1	2.66e-08	0.73	2.03	3.14e-07	2.79	1.11	0.000158	5.81	8.69	2.19e-05	6.93	6.98	"cDNA clone J023121M11 full insert sequence (AHRD V1 *--- B7F743_ORYSJ); contains Interpro domain(s) IPR007679 Protein of unknown function DUF569 "	-23.492	-17.5958	-5.25521	-5.61273
Solyc02g087650.2.1	0.143338	10.33	8.71	0.038523	13.14	15.18	0.106398	10.71	11.84	0.152636	11.18	9.94	Unknown Protein (AHRD V1)	1.94218	2.79125	2.09364	1.90681
Solyc02g087740.2.1	9.49e-07	16.52	16.53	0.00371	44.03	30.67	0.510652	82.75	228.06	0.416274	87.77	95.79	"Cupin RmlC-type (AHRD V1 **-- B4F886_MAIZE); contains Interpro domain(s) IPR012864 Protein of unknown function DUF1637 "	-6.3911	-2.94095	1.32432	-1.30268
Solyc02g087840.2.1	0.781812	12.1	16.27	0.528727	14.46	10.99	4.82e-06	1.26	1.15	0.000182	3.95	2.96	"Homeobox-leucine zipper-like protein (AHRD V1 *-*- Q3HRT1_PICGL); contains Interpro domain(s) IPR001356 Homeobox "	-1.13631	-1.30477	-13.2194	-5.07266
Solyc02g087850.1.1	0.00193	80.94	70.57	0.0149086	52.24	79.74	0.637065	37.49	27.73	0.709444	24.17	24.35	"Glutaredoxin family protein (AHRD V1 **-- D7LM49_ARALY); contains Interpro domain(s) IPR012335 Thioredoxin fold "	3.07721	2.60073	1.21124	-1.14059
Solyc02g087880.2.1	0.169359	5.51	12.7	0.603516	30.18	28.93	0.00992	107.52	92.17	0.00164	126.66	124.4	"Tubulin alpha-7 chain (AHRD V1 ***- B9IJV8_POPTR); contains Interpro domain(s) IPR002452 Alpha tubulin "	-2.3287	1.35286	4.3023	5.24717
Solyc02g087890.2.1	0.527847	9.5	9.12	0.560955	12.3	7.01	2.21e-05	1.34	1.29	9.74e-07	0.61	0.89	Unknown Protein (AHRD V1)	-1.32163	-1.31989	-9.40964	-15.8027
Solyc02g087920.2.1	2.8e-13	41.05	37.96	0.000144	7.6	8.85	1	0.14	0.18	0.250229	2.31	0.78	"NAC domain transcription factor (AHRD V1 *-** Q4U0D4_WHEAT); contains Interpro domain(s) IPR003441 No apical meristem (NAM) protein "	207.74	42.8347	1.46664	8.14591
Solyc02g087950.2.1	0.00217	6.97	6.66	0.0610565	15.48	6.37	0.0191716	13.82	5.47	0.00494	10.48	8.43	"cDNA clone J023065D24 full insert sequence (AHRD V1 *-*- B7EKP5_ORYSJ); contains Interpro domain(s) IPR012870 Protein of unknown function DUF1666 "	-3.48812	-2.27733	-2.70485	-2.84314
Solyc02g087970.1.1	0.0478558	7.53	6.62	0.0195182	6.88	12.03	0.687887	1.38	0.8	0.687786	0.75	0.96	"Zinc finger-homeodomain protein 1 (Fragment) (AHRD V1 **-- B0LK17_YUCFI); contains Interpro domain(s) IPR006456 ZF-HD homeobox protein Cys/His-rich dimerisation region "	3.75895	4.85566	-1.70754	-2.15991
Solyc02g087980.2.1	0.102647	1.12	2.48	0.650865	9.26	6.31	0.0014	23.23	24.85	0.000841	24.86	22.19	"Structural maintenance of chromosomes protein 4 (AHRD V1 **-- D8TXU8_VOLCA); contains Interpro domain(s) IPR003395 RecF/RecN/SMC protein, N-terminal "	-3.03006	1.31391	3.7816	3.59194
Solyc02g087990.2.1	0.000558	38.36	36.63	0.035542	17.71	30.89	0.0022	1.78	0.61	0.0163792	3.79	1.95	"cDNA clone J023065D24 full insert sequence (AHRD V1 *-*- B7EKP5_ORYSJ); contains Interpro domain(s) IPR012870 Protein of unknown function DUF1666 "	4.07067	2.56789	-7.60664	-3.45532
Solyc02g088070.2.1	0.0316592	1.41	1.56	0.0753351	3.06	1.51	1	6.66	10.52	1	9.62	8.14	"Dof zinc finger protein (AHRD V1 ***- C4B6D7_IPOBA); contains Interpro domain(s) IPR003851 Zinc finger, Dof-type "	-4.81918	-3.32352	1.02095	1.02411
Solyc02g088080.1.1	0.000583	0	0	0.0914051	4.58	5.34	0.00155	0.38	1.18	0.0242007	2.78	3.59	Unknown Protein (AHRD V1)	-148.381	-3.86449	-22.8836	-6.45761
Solyc02g088090.1.1	2.72e-05	296.35	317.42	0.00467	119.87	262.19	0.341492	149.98	27.49	0.686205	77.34	51.02	"Calmodulin-like protein (AHRD V1 *-*- B6TXW9_MAIZE); contains Interpro domain(s) IPR011992 EF-Hand type "	6.41673	3.90671	1.71505	1.19009
Solyc02g088100.2.1	0.633949	2.29	1.15	0.0766586	7.81	2.77	7.6e-08	39.04	18.49	2.4e-08	17.98	39.65	"Expansin (AHRD V1 ***- Q9ZP31_SOLLC); contains Interpro domain(s) IPR007112 Expansin 45, endoglucanase-like IPR007117 Pollen allergen/expansin, C-terminal "	2.02623	5.75969	29.3185	28.6493
Solyc02g088130.1.1	0.264811	67.39	183.86	0.0275688	83.66	96.31	0.00622	39.21	95.7	3.38e-05	64.79	33.29	Unknown Protein (AHRD V1)	-1.53955	-2.1726	-3.09979	-4.37738
Solyc02g088180.2.1	0.0121238	36.27	38.26	0.0534527	29.17	56.7	3.52e-06	15.25	14.23	1.55e-05	26.97	14.25	"NAC domain protein (AHRD V1 ***- C0KLH1_PONTR); contains Interpro domain(s) IPR003441 No apical meristem (NAM) protein "	-2.41616	-2.14999	-6.64661	-4.92424
Solyc02g088200.2.1	0.842587	23.84	23.59	0.781714	18.24	20.72	0.00368	8.14	7.3	0.00407	8.47	9.25	Activating signal cointegrator 1 complex subunit 1 (AHRD V1 **-- C3KHG7_ANOFI)	1.10674	-1.13325	-3.00075	-2.69369
Solyc02g088220.2.1	0.00135	41.25	40.7	0.0397526	28.03	26.35	0.219435	20.15	21.15	0.164809	24.4	18.32	"Xenotropic and polytropic retrovirus receptor (AHRD V1 **-* B2GU54_XENTR); contains Interpro domain(s) IPR004342 EXS, C-terminal "	3.62997	2.33533	1.67747	1.68772
Solyc02g088240.2.1	0.402293	87.26	83.78	0.863962	155.43	111.56	2.18e-05	21.62	14.37	0.000165	16.32	35.13	"Xenotropic and polytropic retrovirus receptor (AHRD V1 **-- B2GU54_XENTR); contains Interpro domain(s) IPR004342 EXS, C-terminal "	-1.3932	1.07929	-7.20066	-5.16884
Solyc02g088250.2.1	0.396615	47.73	57.12	1	107.32	46.72	1.5e-05	11.16	7.64	0.000161	11.2	19.15	"Xenotropic and polytropic retrovirus receptor (AHRD V1 *--- B2GU54_XENTR); contains Interpro domain(s) IPR004331 SPX, N-terminal "	-1.41884	-1.00414	-8.52508	-5.44558
Solyc02g088260.2.1	0.0953513	210.27	180.4	0.202654	229.3	227.73	0.0644627	206.93	173.07	0.0231599	191	185.35	Latex abundant protein 1 (AHRD V1 *--- Q6XNP6_HEVBR)	-1.75452	-1.55406	-1.97993	-2.0591
Solyc02g088310.1.1	1.73e-06	12.2	17.73	0.0576061	3.09	5.52	1	0.23	0.07	1	0.45	0.2	"AP2/ERF domain-containing transcription factor (AHRD V1 ***- B9IK18_POPTR); contains Interpro domain(s) IPR001471 Pathogenesis-related transcriptional factor and ERF, DNA-binding "	25.9546	7.44539	-2.2207	-1.398
Solyc02g088320.2.1	0.0208902	8.54	8.26	0.0312144	6.53	9.93	0.154371	5.35	7.13	0.424954	5.26	4.79	"cDNA clone J075153F01 full insert sequence (AHRD V1 **-- B7F9A7_ORYSJ); contains Interpro domain(s) IPR009769 Protein of unknown function DUF1336 "	3.72127	3.5418	2.54583	2.00817
Solyc02g088340.2.1	8.69e-09	11.56	11.65	3.05e-07	20.11	7.95	0.245545	7.53	155.24	0.000169	48.83	30.27	"WRKY transcription factor-c (AHRD V1 **** Q5DJV3_CAPAN); contains Interpro domain(s) IPR003657 DNA-binding WRKY "	-13.6584	-11.7668	-2.18545	-4.56774
Solyc02g088350.2.1	0.344306	6.94	7.69	1	4.18	3.44	0.0149838	10.02	16.56	0.0589619	9.41	10.65	Genomic DNA chromosome 3 P1 clone MXO21 (AHRD V1 ***- Q9LS78_ARATH)	1.80384	-1.07866	2.97198	2.18737
Solyc02g088460.2.1	0.0755399	50.92	82.08	0.111852	81.15	62.78	0.106056	68.37	79.63	0.0320246	76.15	62.91	"Chorismate mutase 1 (AHRD V1 **** D2CSU4_PETHY); contains Interpro domain(s) IPR008238 Chorismate mutase of the AroQ class, eukaryotic type "	-1.83185	-1.73734	-1.78994	-1.95977
Solyc02g088480.2.1	0.721951	20.96	22.89	1	17.76	19.64	0.0195132	7.81	8.82	0.0118211	8.62	7.76	"T7.1 protein (AHRD V1 *-*- Q9FZE6_ARATH); contains Interpro domain(s) IPR008581 Protein of unknown function DUF863, plant "	1.16416	-1.03672	-2.45184	-2.55513
Solyc02g088490.2.1	0.0948306	19.72	24.14	0.184696	20.33	20.07	0.0527286	27.09	26.22	0.0231062	29.83	27.33	"Saccharopine dehydrogenase (AHRD V1 ***- B6T3D2_MAIZE); contains Interpro domain(s) IPR005097 Saccharopine dehydrogenase "	1.91761	1.71862	2.13484	2.22068
Solyc02g088500.1.1	1.49e-06	38.28	70.85	0.0930737	12.28	17.02	0.0562714	2.23	2.51	0.168298	3.2	3.06	"C-glucosyltransferase (AHRD V1 **** C3W7B0_ORYSJ); contains Interpro domain(s) IPR002213 UDP-glucuronosyl/UDP-glucosyltransferase "	8.06837	2.14121	-2.92922	-2.30186
Solyc02g088600.2.1	0.021863	13.83	10.43	0.165439	7.77	11.76	0.830176	5.58	6.03	0.824338	6.05	5.8	"Pentatricopeptide repeat-containing protein (AHRD V1 ***- D7MRA3_ARALY); contains Interpro domain(s) IPR002885 Pentatricopeptide repeat "	2.79092	2.18191	1.23497	1.22635
Solyc02g088630.2.1	0.00401	62.61	53.69	0.672472	169.49	142.48	0.0186985	95.18	29.64	0.00436	59.47	78.47	"Glycosyltransferase (AHRD V1 ***- B9IK47_POPTR); contains Interpro domain(s) IPR002495 Glycosyl transferase, family 8 "	-3.03806	-1.17698	-3.0852	-2.88654
Solyc02g088740.1.1	1	36.62	61	0.796204	62.87	46.9	0.118964	37.06	12.82	0.0114006	21.65	19.02	Genomic DNA chromosome 5 TAC clone K3 (AHRD V1 ***- Q9FL84_ARATH)	1.0158	1.11284	-2.07217	-2.62784
Solyc02g088750.1.1	4.7e-20	127.67	129.55	7.47e-10	21.37	37.82	1	0	0	0.125229	2.37	1.81	"UDP-glucuronosyltransferase (AHRD V1 **** Q5UB81_ARATH); contains Interpro domain(s) IPR002213 UDP-glucuronosyl/UDP-glucosyltransferase "	1001.75	228.821	1	16.3298
Solyc02g088830.2.1	0.267839	1.1	6.05	0.928054	13.7	7.69	0.00167	44.38	53.95	0.000784	55.63	44.55	F1C9.9 protein (AHRD V1 *-*- Q9SGB0_ARATH)	-2.50666	1.13908	4.89823	4.83948
Solyc02g088910.2.1	1.43e-08	20.72	20.64	0.00021	55.52	20.27	0.00127	34.46	68.12	0.0011	72.23	60.92	"Ninja-family protein 3 (AHRD V1 ***- NNJA3_WHEAT); contains Interpro domain(s) IPR012463 Protein of unknown function DUF1675 "	-7.9399	-4.52843	-3.53676	-2.79371
Solyc02g088920.2.1	0.0159375	9.87	9.47	0.139486	14.77	13.35	0.0775414	10.86	16.66	0.230822	18.72	17.89	"Ras GTPase-activating protein-binding protein 2 (AHRD V1 *--- B5X4A8_SALSA); contains Interpro domain(s) IPR018222 Nuclear transport factor 2, Eukaryote "	-2.4925	-1.7785	-1.929	-1.49154
Solyc02g089010.1.1	0.0311497	4.88	1.84	0.0153823	4.2	2.29	0.168642	8.16	5.31	0.565478	10.63	9.09	"Receptor-like kinase (AHRD V1 *-*- A7VM32_MARPO); contains Interpro domain(s) IPR001245 Tyrosine protein kinase "	-3.17977	-3.40392	-1.76843	-1.25035
Solyc02g089090.2.1	0.0687681	12.21	13.19	0.307107	8.92	11.14	0.0019	26.36	19.18	0.0043	20.27	17.3	Pto-like, Serine/threonine kinase protein, resistance protein	2.2368	1.71806	3.65824	2.93906
Solyc02g089110.2.1	0.00547	9.71	10.93	0.0652388	16.73	12.86	0.0626692	18.24	13.51	0.0600878	17.07	16.89	"Mitochondrial carrier protein (AHRD V1 ***- Q69FA0_PHAVU); contains Interpro domain(s) IPR002067 Mitochondrial carrier protein "	-2.79149	-2.01873	-1.98989	-1.91585
Solyc02g089120.2.1	0.0423276	24.22	11.24	0.037118	12.35	26.28	1	6.58	8.49	0.54466	6.23	5.07	"Ch-cobra (AHRD V1 ***- B7S746_CUNLA); contains Interpro domain(s) IPR017391 COBRA-like "	2.55863	2.6889	-1.00441	-1.36736
Solyc02g089130.2.1	1	1.76	1.66	0.475008	2.53	2.41	0.00579	8.5	8.04	0.146733	4.82	4.8	"COBRA-like protein (AHRD V1 ***- B6E8Y8_9MYRT); contains Interpro domain(s) IPR017391 COBRA-like "	1.41107	1.93654	5.91672	3.39285
Solyc02g089150.2.1	6.07e-15	55.27	63.31	6.15e-07	10.77	27.2	1	0.61	1	0.250229	1.93	1.73	"MAPprotein kinase-like protein (AHRD V1 **-- Q6YW97_ORYSJ); contains Interpro domain(s) IPR017946 PLC-like phosphodiesterase, TIM beta/alpha-barrel domain "	387.686	123.654	5.82783	12.0319
Solyc02g089190.1.1	0.00315	12.67	16.33	1.86e-06	34.33	31.01	1	7.07	0	0.0706462	0.67	0.13	"MYB transcription factor (AHRD V1 **-* Q9LRU5_ARATH); contains Interpro domain(s) IPR015495 Myb transcription factor "	4.25426	9.25198	-1.01935	-7.18571
Solyc02g089210.2.1	0.264084	40.14	41.4	0.799107	20.64	40.76	0.00533	9.56	7.83	0.00387	11.01	8.07	"MADS box transcription factor (AHRD V1 ***- Q689E7_GENTR); contains Interpro domain(s) IPR002487 Transcription factor, K-box "	1.54371	1.13397	-3.2815	-3.08162
Solyc02g089250.2.1	0.564237	4.24	11.45	0.139609	17.43	9.31	4.55e-08	69.17	128.42	7.2e-07	41.97	105.72	"Pollen Ole e 1 allergen and extensin (AHRD V1 *-*- Q2HSE9_MEDTR); contains Interpro domain(s) IPR006041 Pollen Ole e 1 allergen and extensin "	1.41221	2.32893	16.1115	11.886
Solyc02g089490.2.1	0.00107	33	32.4	0.906108	11.13	7.99	0.117936	2.94	3.68	0.159029	4.58	3.49	Unknown Protein (AHRD V1)	4.04048	1.14967	-2.58547	-2.19051
Solyc02g089500.2.1	0.00258	53.47	30.36	0.550459	11.25	23.06	0.0022	3.41	3.08	0.00291	4.05	4.42	Tomato CONSTANS-like 2	3.37083	1.33612	-4.08145	-3.25099
Solyc02g089510.2.1	0.00294	29.12	27.8	0.436673	12.04	15.94	0.00949	2.29	3.17	0.213592	7.64	5.1	Unknown Protein (AHRD V1)	3.00612	1.43968	-3.64228	-1.64699
Solyc02g089520.1.1	0.0318879	19.91	10.29	1	4.09	6.94	0.0611125	1.39	2.18	0.33357	4.01	2.7	Tomato CONSTANS-like 3	2.70531	-1.03443	-3.22094	-1.82325
Solyc02g089530.2.1	0.877862	13.27	18.72	0.00285	3.73	0	0.0761473	3.63	8.56	0.0132881	4.25	4.9	Unknown Protein (AHRD V1)	1.09924	-7.62913	-2.57743	-3.48425
Solyc02g089540.2.1	0.0939359	6.48	2.62	0.0290825	2.33	4.48	0.00159	2	1.53	0.0019	3.06	1.81	Tomato CONSTANS-like 1	-2.49355	-3.41774	-6.74949	-5.12651
Solyc02g089550.2.1	0.00804	14.97	15.31	0.000507	20.81	23.08	1.47e-05	31.52	27.5	1.98e-06	32.27	34.69	Receptor like kinase, RLK	3.33216	4.67449	5.92232	6.53218
Solyc02g089610.1.1	0.496608	431.11	179.63	0.547871	605.95	536.67	0.00651	163.01	34.35	0.000137	107.91	76.92	"S-adenosylmethionine decarboxylase proenzyme (AHRD V1 **** Q7XZQ9_VITVI); contains Interpro domain(s) IPR001985 S-adenosylmethionine decarboxylase "	-1.37181	1.2954	-4.67828	-5.21113
Solyc02g089620.2.1	0.0178408	293.43	207.23	0.551026	656.84	349.68	0.0004	175.03	142.31	0.00112	228.65	210.36	"Proline dehydrogenase (AHRD V1 **** A1E289_ACTDE); contains Interpro domain(s) IPR015659 Proline oxidase "	-2.42035	-1.26219	-4.20655	-3.1353
Solyc02g089630.2.1	0.000211	86.81	54.98	0.100334	204.68	121.29	0.00069	100.33	58.18	0.000486	68.37	115.49	"Proline dehydrogenase (AHRD V1 **** A1E289_ACTDE); contains Interpro domain(s) IPR015659 Proline oxidase "	-4.04213	-1.84465	-3.98031	-3.52483
Solyc02g089640.2.1	0.00193	354.71	266.07	0.000756	415.27	328.33	0.843789	166.67	31.76	0.764223	73.4	87.6	Cellulose synthase-like C1-2 glycosyltransferase family 2 protein (AHRD V1 **** D8T077_SELML)	3.82339	4.39465	1.12159	-1.13933
Solyc02g089660.1.1	0.144921	23.6	34.78	0.894525	20.42	13.47	0.131996	9.28	3.72	0.0363571	3.16	6.74	Unknown Protein (AHRD V1)	1.97291	1.11767	-2.42381	-3.25611
Solyc02g089680.2.1	0.029324	50.07	43.44	0.389351	97.44	58.38	0.0743071	74.29	32.06	0.0349625	50.66	61.79	"Leaf senescence protein-like (AHRD V1 ***- Q8RV74_ORYSJ); contains Interpro domain(s) IPR004253 Protein of unknown function DUF231, plant "	-2.21864	-1.3878	-2.13032	-2.08012
Solyc02g089690.2.1	0.144338	4.85	5.81	0.721997	18.59	9.49	0.0310828	32.03	28.72	0.0114603	32.1	37.24	"Leaf senescence protein-like (AHRD V1 ***- Q8RV74_ORYSJ); contains Interpro domain(s) IPR004253 Protein of unknown function DUF231, plant "	-2.07941	1.20445	2.46231	2.73782
Solyc02g089700.2.1	0.00867	19.52	30.67	0.342262	72.69	32.19	0.135369	39.34	48.86	0.132249	38.02	56.03	"Leaf senescence protein-like (AHRD V1 ***- Q8RV74_ORYSJ); contains Interpro domain(s) IPR004253 Protein of unknown function DUF231, plant "	-3.10797	-1.54197	-1.93034	-1.85087
Solyc02g089720.1.1	0.000143	23.82	24.49	0.0394701	59.45	29.19	0.103059	70.11	38.56	0.00382	39.45	42.53	"Endo-beta-1 3-glucanase (AHRD V1 ***- B5THH0_PNECA); contains Interpro domain(s) IPR005200 Glycoside hydrolase, family 81 "	-3.85629	-2.18947	-1.87381	-2.56112
Solyc02g089730.1.1	0.598428	6.23	13.65	1	16.14	10.9	0.0316783	38.77	31.97	0.0123513	38.36	37.48	"Endo-1 3-beta-glucanase (AHRD V1 ***- C5FLR9_NANOT); contains Interpro domain(s) IPR005200 Glycoside hydrolase, family 81 "	-1.32135	-1.00043	2.46247	2.55998
Solyc02g089740.2.1	0.543258	4.73	7.76	0.363265	12.98	3.98	0.00245	20.74	14.28	0.00527	11.82	19.11	Unknown Protein (AHRD V1)	1.41291	1.84364	3.58982	3.08907
Solyc02g089750.2.1	1	2.73	12.11	0.185382	12.9	11.82	0.061136	21.8	11.75	0.0251979	15.64	19.33	"Receptor kinase (AHRD V1 ***- B8XA57_GOSBA); contains Interpro domain(s) IPR002290 Serine/threonine protein kinase "	1.11438	1.80815	2.31493	2.34216
Solyc02g089870.1.1	0.0464362	23.92	25.91	0.0109577	23.69	15.85	0.237077	31.53	38.27	0.162415	36.03	35.57	"RING finger protein 5 (AHRD V1 **-- B6TLS1_MAIZE); contains Interpro domain(s) IPR018957 Zinc finger, C3HC4 RING-type "	-1.99798	-2.60146	-1.56436	-1.56661
Solyc02g089900.1.1	0.0280908	78.28	55.68	0.276731	117.63	92.84	0.00721	71.98	19.83	1.68e-05	36.98	36.7	"Receptor-like kinase (AHRD V1 *-*- A7VM35_MARPO); contains Interpro domain(s) IPR002290 Serine/threonine protein kinase "	-2.24966	-1.49322	-3.58504	-4.62976
Solyc02g089920.1.1	0.115338	3.6	4.97	0.132361	4.79	3.9	0.000123	0.73	0.55	0.000418	0.7	1.23	"Receptor-like protein kinase At3g21340 (AHRD V1 *-*- RLK6_ARATH); contains Interpro domain(s) IPR002290 Serine/threonine protein kinase "	-2.09406	-2.12729	-13.0059	-9.41367
Solyc02g089930.2.1	0.0348267	95.75	80.16	0.175922	53.81	90.54	0.638532	54.26	54.21	0.617658	43.08	35.31	"Homeobox protein LIM-3 (Fragment) (AHRD V1 *--- O42286_DANRE); contains Interpro domain(s) IPR001781 Zinc finger, LIM-type "	2.13172	1.69771	1.19662	-1.18918
Solyc02g089940.2.1	0.00362	34.09	38.39	0.156848	18.88	23.01	0.725835	8.96	10.01	1	12.47	10.94	"BEL1-like homeodomain protein 2 (AHRD V1 **-- BLH2_ARATH); contains Interpro domain(s) IPR006563 POX "	3.37031	1.89752	-1.22446	-1.02072
Solyc02g089950.1.1	0.369171	6.4	10.92	0.386529	9.66	8.33	0.0111326	15.2	21.01	0.00179	21	19.92	Os12g0596600 protein (Fragment) (AHRD V1 *-*- Q0IM59_ORYSJ)	1.6294	1.64911	3.09519	3.39494
Solyc02g089980.2.1	0.391552	14.84	22.61	0.037005	31.93	29.38	0.031988	31.93	34.65	0.0238448	33.9	33.99	"Ternary complex factor MIP1 (AHRD V1 **-- B6UE27_MAIZE); contains Interpro domain(s) IPR006869 Protein of unknown function DUF547 "	1.44293	2.29639	2.35074	2.32973
Solyc02g089990.1.1	5.3e-08	45.32	45.89	5.47e-06	33.24	31.08	0.000711	33.55	14.32	0.000908	13.66	24.73	TMV response-related protein (AHRD V1 *--- B6UG28_MAIZE)	12.6492	8.65044	6.11087	4.78698
Solyc02g090000.2.1	1	4.06	3.13	0.560308	3.64	0	0.0481461	7.01	10.97	0.0805308	8.73	7.42	"UPF0497 membrane protein At3g50810 (AHRD V1 ***- U497K_ARATH); contains Interpro domain(s) IPR006702 Uncharacterised protein family UPF0497, trans-membrane plant "	1.1789	-1.68025	2.64019	2.31439
Solyc02g090030.2.1	0.0118799	5.51	2.55	0.516725	1.91	0	4.64e-07	10.6	15.81	2.36e-05	9.97	11.49	"Oxygen-evolving enhancer protein 1 of photosystem II (AHRD V1 ***- A8J0E4_CHLRE); contains Interpro domain(s) IPR002628 Photosystem II manganese-stabilizing protein PsbO "	17.1681	4.35104	51.338	41.0198
Solyc02g090050.2.1	0.196563	4.04	3.18	0.483112	3.87	1.54	0.0260799	4.11	7.81	0.453625	2.72	2.69	Unknown Protein (AHRD V1)	4.05214	2.97742	6.06921	2.75999
Solyc02g090070.2.1	0.722949	5.92	8.27	0.143697	15.83	8.18	0.0513612	16.21	12.96	0.00144	18.55	23.17	"Phototropic-responsive NPH3 family protein (AHRD V1 **-- D7MMF7_ARALY); contains Interpro domain(s) IPR004249 NPH3 "	1.24183	2.01929	2.31835	3.21774
Solyc02g090080.1.1	4.83e-21	140.01	241.25	6.16e-08	29.69	13.51	1	0	0	0.125229	2.82	1.47	Unknown Protein (AHRD V1)	1468.35	165.326	1	16.7711
Solyc02g090100.1.1	0.0207451	7.9	8.01	0.0449284	5.84	9.4	0.0103908	9.95	7.86	0.025867	5.32	11.14	Unknown Protein (AHRD V1)	3.78756	3.52704	3.88197	3.50088
Solyc02g090110.2.1	0.00395	20.59	18.68	0.44549	53.15	32.96	0.0790821	25.95	36.92	0.0124904	32.19	21.43	"Receptor-like kinase (AHRD V1 *-** A7VM25_MARPO); contains Interpro domain(s) IPR002290 Serine/threonine protein kinase "	-2.80322	-1.33219	-1.92882	-2.32579
Solyc02g090120.1.1	6.38e-07	3.78	2.89	5.56e-05	9.21	5.03	0.566816	4.26	224.72	0.0814548	47.47	13	Unknown Protein (AHRD V1)	-18.8193	-9.32676	1.57951	-2.44679
Solyc02g090210.2.1	0.188275	13.44	15.95	0.267826	24.82	6.74	0.000667	42.66	37.39	7.84e-05	45.75	45.55	"GDSL esterase/lipase At2g23540 (AHRD V1 **** GDL38_ARATH); contains Interpro domain(s) IPR001087 Lipase, GDSL "	1.79455	1.84043	4.44439	4.93116
Solyc02g090220.2.1	0.00677	4.36	1.33	0.0349976	5.32	5.08	0.161302	12.34	6.42	0.0944898	9.09	8.88	"Dof zinc finger protein (AHRD V1 *-*- Q9SXG5_ORYSA); contains Interpro domain(s) IPR003851 Zinc finger, Dof-type "	-6.15158	-3.57426	-2.11539	-2.27441
Solyc02g090300.2.1	1	0.9	2.47	1	1.73	2.39	0.0610238	5.46	6.34	0.0496185	8.57	5.69	Cytochrome P450	1.02038	1.20076	3.11498	3.64781
Solyc02g090310.1.1	0.001	6.09	6.16	0.0651848	12.48	11.74	0.733259	25.23	20.74	0.544877	33.22	36.89	"Dof zinc finger protein 4 (AHRD V1 *-*- A5HWF3_HORVD); contains Interpro domain(s) IPR003851 Zinc finger, Dof-type "	-3.98612	-2.10273	-1.17918	1.25575
Solyc02g090330.2.1	0.0988429	6.85	5.82	1	4.36	0.79	0.0377618	6.47	8.93	0.119307	5.7	5.83	"Autophagy-related protein 101 (AHRD V1 *--- ATGA1_XENLA); contains Interpro domain(s) IPR012445 Protein of unknown function DUF1649 "	3.09851	1.24964	3.43799	2.52351
Solyc02g090360.2.1	0.596913	221.34	140.6	0.00922	673.03	311.19	0.259064	560.99	65.6	0.11213	237.24	388.42	"Laccase-22 (AHRD V1 **-- LAC22_ORYSJ); contains Interpro domain(s) IPR001117 Multicopper oxidase, type 1 "	1.24912	3.22716	1.98055	1.90857
Solyc02g090380.2.1	1.45e-07	45.77	43.48	5.05e-05	27.98	27.29	0.00285	24.55	12.3	0.00329	16.31	15.25	Nbs-lrr, resistance protein	10.0708	6.04732	3.82652	3.18119
Solyc02g090390.2.1	0.548328	106.75	95.34	0.547996	101.96	106.63	0.0242895	46.9	68.69	0.00292	53.61	50.55	"Serine-threonine protein kinase (AHRD V1 **** O24395_WHEAT); contains Interpro domain(s) IPR015740 Plant protein serine/threonine kinase-like "	-1.2349	-1.23773	-2.37603	-2.70307
Solyc02g090400.2.1	9.28e-07	5.23	5.71	0.00672	18.33	9.95	1.47e-05	8.07	6.1	2.54e-05	8.92	9.59	"Myb family transcription factor (AHRD V1 **-* D7LQI3_ARALY); contains Interpro domain(s) IPR006447 Myb-like DNA-binding region, SHAQKYF class "	-7.42807	-3.01885	-6.29783	-4.97753
Solyc02g090450.2.1	0.71273	15.54	21.89	8.1e-05	0.66	0	0.113267	0.9	12.09	0.0194144	5.84	4.86	"Peroxidase (AHRD V1 ***- Q58GF4_9ROSI); contains Interpro domain(s) IPR002016 Haem peroxidase, plant/fungal/bacterial "	1.2102	-34.8944	-2.59013	-3.17587
Solyc02g090460.2.1	0.0036	12.21	13.19	0.132866	11.56	29.61	0.442657	31.5	31.15	0.0482188	26.69	16.16	Unknown Protein (AHRD V1)	-3.0235	-1.91622	-1.34875	-2.03062
Solyc02g090470.2.1	0.338187	21.96	39.48	0.000733	5.72	14.53	0.0217656	5.77	27.14	0.000582	15.75	12.24	"Peroxidase (AHRD V1 ***- Q58GF4_9ROSI); contains Interpro domain(s) IPR002016 Haem peroxidase, plant/fungal/bacterial "	-1.43685	-4.39614	-2.92544	-3.50354
Solyc02g090480.2.1	0.0636705	0.84	1.54	0.629462	6.25	1.03	0.079172	13.76	15.48	0.0136567	17.57	17.72	"Peptidyl-prolyl cis-trans isomerase D (AHRD V1 **** PPID_RAT); contains Interpro domain(s) IPR002130 Peptidyl-prolyl cis-trans isomerase, cyclophilin-type "	-4.48499	-1.61906	2.27223	2.65883
Solyc02g090490.2.1	0.713671	157.92	81.83	0.769574	148.69	112.54	0.0258065	79.58	31.64	0.000841	51.4	39.06	"Patatin-like protein 3 (AHRD V1 ***- Q9FZ08_TOBAC); contains Interpro domain(s) IPR002641 Patatin "	-1.16645	-1.1238	-2.76903	-3.53098
Solyc02g090500.2.1	0.0837683	2.28	0.9	0.89012	1.94	11.73	0.171566	4	1.15	0.0355635	1.49	2.47	HAD-superfamily hydrolase subfamily IA variant 3 containing protein expressed (AHRD V1 ***- Q10ME8_ORYSJ)	-3.3908	1.1637	-2.34867	-3.0889
Solyc02g090590.1.1	0.0462532	0	2.42	0.0229824	1.21	0	0.0112616	0.38	0.87	0.0445616	2.2	1.06	Unknown Protein (AHRD V1)	-7.23187	-13.4685	-13.7607	-6.11674
Solyc02g090620.2.1	0.00397	4.89	7.1	0.161943	10.25	11.82	0.682971	14.76	20.18	1	21.85	18.45	Unknown Protein (AHRD V1)	-3.06836	-1.73063	-1.16694	-1.04121
Solyc02g090740.2.1	0.0172322	5.27	3.78	0.0532047	6	5.36	0.00965	4.88	5.5	0.00628	4.75	5.17	"Multidrug resistance protein mdtK (AHRD V1 *-*- MDTK_PHOLL); contains Interpro domain(s) IPR002528 Multi antimicrobial extrusion protein MatE "	-3.08787	-2.55793	-2.95664	-3.17005
Solyc02g090750.2.1	0.00678	2.98	3.97	0.0031	4.29	1.44	0.00702	4.35	5.01	0.000707	3.46	3.04	ATP-dependent RNA helicase fal1 (AHRD V1 ***- B2WHT2_PYRTR)	-3.56583	-4.42802	-2.91704	-4.26461
[truncated: 5,666 more rows]

## Sheet: Table_S2
Table S2. Differentially expressed genes (DEGs) significantly regulated (P ≤ 0.05) for each condition, in comparison with control,
[truncated: 4,182 more rows]

[truncated: 10 more sheets: Table_S3, Table_S4, Table_S5, Table_S6, Table_S7, Table_S8, Table_S9, Table_S10, Table_S11, Table_S12]
